# Supplementary material for: Age-dependent remodeling of gut microbiome and host serum metabolome in mice
Source: Aging (Albany NY). 2021 Feb 17;13(5):6330–45. doi: 10.18632/aging.202525 (PMC7993679; doi:10.18632/aging.202525)
Supplement: Supplementary Table 1 [file aging-13-202525-s001.xls]

## Sheet: peaks list
Supplementary Table 1. List of annotated metabolite features.
Label	Name	Formula	Molecular Weight	RT [min]	3M1	3M2	3M3	3M4	12M1	12M2	12M3	12M4	12M5	18M1	18M2	18M3	18M4	28M1	28M2	28M3	28M4
M_0001	(1,5-Cyclohexadien-1-ylsulfonyl)benzene	C12 H12 O2 S	220.056	1.13	1.63797e+08	1.49188e+08	1.57568e+08	2.26709e+08	2.132e+08	182247061	1.74148e+08	213700505	1.98643e+08	1.51997e+08	1.78795e+08	1.75654e+08	1.5683e+08	4.04443e+07	1.13406e+08	1.51797e+08	8.9526e+07
M_0002	DA9185000	C12 H10 O S	202.045	1.128	1.6379e+08	1.49037e+08	1.57406e+08	2.2645e+08	2.12978e+08	1.82051e+08	1.73944e+08	2.13476e+08	1.98409e+08	1.51834e+08	1.78537e+08	1.7547e+08	1.56693e+08	4.04125e+07	1.13309e+08	1.51702e+08	8.94415e+07
M_0003	2,4,6-tricyclohexyloxy-1,3,5-triazine	C21 H33 N3 O3	375.252	8.425	1.70759e+08	1.59598e+08	1.4886e+08	1.85364e+08	1.32454e+08	1.84586e+08	1.57141e+08	1.67264e+08	1.83348e+08	177681474	1.64753e+08	150790625	1.18091e+08	85108881	9.09512e+07	8.86734e+07	1.15536e+08
M_0004	L-Norleucine	C6 H13 N O2	131.095	1.59	5.66983e+07	4.55896e+07	9.44848e+07	6.01605e+07	7.62755e+07	1.15734e+08	8.00671e+07	5.46841e+07	3.5036e+07	6.26846e+07	4.55966e+07	8.93722e+07	6.20096e+07	1.5547e+08	7.82015e+07	1.00124e+08	6.42012e+07
M_0005	L-(+)-Valine	C5 H11 N O2	117.079	1.172	1.06491e+08	9.9706e+07	1.51437e+08	1.41249e+08	1.23034e+08	1.46503e+08	1.10307e+08	1.18842e+08	1.07644e+08	1.08049e+08	1.03516e+08	1.44355e+08	1.05781e+08	1.16489e+08	9.24802e+07	1.28421e+08	9.54746e+07
M_0006	DL-Tryptophan	C11 H12 N2 O2	204.09	3.495	6.20383e+07	9.28266e+07	9.14198e+07	5.99538e+07	1.07055e+08	116277727	8.3161e+07	7.91175e+07	9.1504e+07	8.42516e+07	7.59409e+07	1.00885e+08	8.50374e+07	5.92434e+07	8.2134e+07	8.58743e+07	1.03436e+08
M_0007	L-Phenylalanine	C9 H11 N O2	165.079	2.445	6.8557e+07	6.53624e+07	9.37593e+07	6.12691e+07	7.89186e+07	1.05056e+08	7.92042e+07	5.77665e+07	4.90628e+07	6.47042e+07	4.37854e+07	8.05012e+07	5.8198e+07	1.39532e+08	8.0807e+07	139426272	8.47624e+07
M_0008	trans-3-Indoleacrylic acid	C11 H9 N O2	187.063	3.495	6.09737e+07	9.08672e+07	8.92763e+07	5.87864e+07	1.04844e+08	1.13939e+08	8.1913e+07	7.71981e+07	8.97504e+07	8.30138e+07	7.43648e+07	9.87513e+07	8.32858e+07	5.82603e+07	8.05213e+07	8.4009e+07	1.0155e+08
M_0009	Cinnamic acid	C9 H8 O2	148.053	2.45	6.68719e+07	6.3814e+07	9.12598e+07	5.97655e+07	7.66701e+07	1.02086e+08	7.7147e+07	5.64482e+07	4.78493e+07	6.30648e+07	4.278e+07	7.80951e+07	5.66458e+07	1.37466e+08	7.8887e+07	1.3548e+08	8.30848e+07
M_0010	1-Linoleoyl-sn-glycero-3-phosphocholine	C26 H50 N O7 P	519.333	9.882	6.11839e+07	6.31579e+07	6.88834e+07	5.14279e+07	7.65401e+07	5.64131e+07	6.24105e+07	6.69017e+07	5.73377e+07	1.02628e+08	6.7722e+07	5.72971e+07	5.59211e+07	1.76671e+07	5.33544e+07	3.73915e+07	6.70808e+07
M_0011	1H-1,2,4-triazolo[4,3-b][1,2,4]triazole-3,6-diamine	C3 H5 N7	139.061	1.144	6.42559e+07	5.38879e+07	9.28112e+07	9.86434e+07	8.03192e+07	9.0542e+07	6.9058e+07	7.56021e+07	7.25932e+07	6.46004e+07	7.09887e+07	8.6414e+07	5.93461e+07	3.26365e+07	5.00933e+07	5.48799e+07	4.96876e+07
M_0012	(2-Amino-3-hydroxybutanoyl)oxonium	C4 H10 N O3	120.065	1.195	1.63138e+07	1.40609e+07	1.26086e+07	8.69857e+06	1.03124e+07	1.47863e+07	1.95693e+07	8.01164e+06	8.74332e+06	1.50659e+07	1.23901e+07	1.28633e+07	1.31234e+07	9.60733e+07	4.03532e+07	2.9583e+07	3.68974e+07
M_0013	1-Stearoylglycerol	C21 H42 O4	358.308	10.464	6.78217e+07	8.58458e+07	8.97205e+07	7.23403e+07	6.74529e+07	5.23624e+07	6.40304e+07	8.24694e+07	9.44303e+07	6.7215e+07	5.62272e+07	6.53198e+07	5.02825e+07	4.9318e+07	6.04361e+07	5.78058e+07	4.76223e+07
M_0014	Choline	C5 H13 N O	103.1	1.063	4.63292e+07	8.21984e+07	4.54095e+07	4.28024e+07	4.43561e+07	4.49637e+07	4.71538e+07	5.14293e+07	5.94296e+07	5.32681e+07	6.44315e+07	4.7682e+07	6.84414e+07	4.51382e+07	5.68236e+07	3.93943e+07	5.91102e+07
M_0015	Choline	C5 H13 N O	103.1	0.96	175485	8.21984e+07	204614	275732	151087	2.23409e+06	5.60098e+06	5.14293e+07	3.44091e+06	320590	5.50855e+06	2.98061e+06	6.84414e+07	2.92698e+06	6.21981e+06	1.61062e+06	4.61261e+06
M_0016	2-Hydroxy-3-(palmitoyloxy)propyl 2-(trimethylammonio)ethyl phosphate	C24 H50 N O7 P	495.333	10.195	5.14235e+07	5.55275e+07	4.62085e+07	6.26961e+07	8.20496e+07	6.3257e+07	5.32513e+07	5.05914e+07	6.15687e+07	6.61065e+07	5.60717e+07	4.71213e+07	5.66552e+07	3.4152e+07	3.32056e+07	4.22168e+07	5.38765e+07
M_0017	g-Butyrobetaine	C7 H15 N O2	145.11	1.121	230844	223676	229358	179971	114488	140668	198859	59603.5	127256	179272	182456	125720	164849	124542	146521	198332	179190
M_0018	TRIS(HYDROXYETHYL)AMINOMETHANE	C7 H17 N O3	163.121	1.078	218750	218595	214671	164844	159961	126946	240434	119929	115317	168012	169492	133369	154976	154567	157277	258202	194028
M_0019	N-[[(8R,9R)-6-[(2S)-1-hydroxypropan-2-yl]-8-methyl-5-oxo-10-oxa-1,6,14,15-tetrazabicyclo[10.3.0]pentadeca-12,14-dien-9-yl]methyl]-N-methylcarbamic acid methyl ester	C18 H31 N5 O5	397.234	8.445	4.93697e+07	5.45959e+07	3.70329e+07	4.56097e+07	3.40818e+07	6.35963e+07	4.60342e+07	4.82821e+07	6.16255e+07	849762	5.72792e+07	5.9206e+07	3.91549e+07	1.66858e+07	2.53686e+07	2.98884e+07	3.56557e+07
M_0020	D-(+)-Proline	C5 H9 N O2	115.064	1.141	2.42977e+07	1.93621e+07	3.82824e+07	2.2732e+07	3.42688e+07	5.03045e+07	3.52481e+07	2.63695e+07	1.56449e+07	1.71221e+07	2.52557e+07	4.15012e+07	2.38126e+07	2.22229e+07	2.3801e+07	6.75284e+07	2.91619e+07
M_0021	N-[[(8R,9R)-6-[(2S)-1-hydroxypropan-2-yl]-8-methyl-5-oxo-10-oxa-1,6,14,15-tetrazabicyclo[10.3.0]pentadeca-12,14-dien-9-yl]methyl]-N-methylcarbamic acid methyl ester	C18 H31 N5 O5	397.234	8.485	4.93697e+07	5.45959e+07	3.70329e+07	4.83172e+06	1.0275e+07	6.35963e+07	4.60342e+07	4.82821e+07	6.16255e+07	849762	1.13124e+07	5.9206e+07	2.33825e+06	1.66858e+07	2.53686e+07	9.47595e+06	3.56557e+07
M_0022	D-(+)-Proline	C5 H9 N O2	98.0371	1.141	2.22286e+07	1.79065e+07	3.50976e+07	2.10549e+07	3.07913e+07	4.53352e+07	3.13676e+07	2.39304e+07	1.44949e+07	1.51955e+07	2.29686e+07	3.7522e+07	2.16458e+07	1.83485e+07	2.17021e+07	6.01467e+07	2.60594e+07
M_0023	Caprylic anhydride	C16 H30 O3	270.219	8.7	5.0879e+07	2.18521e+07	2.83182e+07	1.66394e+07	1.44076e+07	9.37197e+06	2.05822e+07	1.22804e+07	3.35752e+07	4.54769e+07	2.13849e+07	1.95685e+07	1.66816e+07	1.92572e+07	2.56997e+07	1.57606e+07	2.4085e+06
M_0024	DA9185000	C12 H10 O S	202.045	1.341	3.02516e+07	1.84842e+07	2.44812e+07	3.33299e+07	3.93209e+07	1.74372e+07	3.44694e+07	3.57258e+07	4.04528e+07	3.95568e+07	5.08699e+07	3.68067e+07	1.3444e+07	4.76057e+06	1.60588e+07	1.55788e+07	4.68546e+06
M_0025	Creatine	C4 H9 N3 O2	131.07	1.095	2.4423e+07	4.96743e+07	2.61448e+07	2.34325e+07	1.67452e+07	1.93763e+07	2.39095e+07	3.41605e+07	1.76449e+07	1.53783e+07	2.06336e+07	2.23259e+07	2.0251e+07	2.78871e+07	1.13933e+07	1.08505e+07	1.20847e+07
M_0026	Acetophenone	C8 H8 O	120.058	1.333	31014	29362.3	33847.5	29322.4	27428	33767.9	29837.1	24459.5	23193.6	24966.7	26186.2	29939	25581.8	55212	35232.2	34852.9	34159.7
M_0027	aloxistatin	C17 H30 N2 O5	342.217	9.094	8.84532e+06	1.55252e+07	7.56152e+06	6.73945e+06	9.14912e+06	9.0872e+06	1.42909e+07	1.26161e+07	8.21395e+06	1.1733e+07	7.06173e+06	1.08414e+07	7.79477e+06	3.246e+07	3.60188e+07	2.20874e+07	4.2151e+07
M_0028	quinapyramine	C17 H22 N6	310.191	9.1	8.61827e+06	1.52886e+07	7.37334e+06	6.52478e+06	9.02202e+06	8.91647e+06	1.40422e+07	1.2374e+07	8.05989e+06	1.15118e+07	6.93136e+06	1.06323e+07	7.62258e+06	3.2027e+07	3.55994e+07	2.17843e+07	4.15849e+07
M_0029	Anthranilic acid	C7 H7 N O2	137.048	6.119	209395	259123	218927	173863	107506	168699	184916	91087.7	85457.9	78035.2	142120	186696	242874	163174	74959.1	155686	163490
M_0030	8-{3-Oxo-2-[(2E)-2-penten-1-yl]-1-cyclopenten-1-yl}octanoic acid	C18 H28 O3	292.201	8.698	3.64411e+07	4.16746e+06	2.04677e+07	1.17923e+07	5.90669e+06	2.15155e+06	1.46306e+07	8.68268e+06	2.42188e+07	3.46272e+07	1.53146e+07	1.40109e+07	1.37245e+07	1.3887e+07	1.85529e+07	1.13095e+07	3.24119e+06
M_0031	Phenylacetylene	C8 H6	102.047	2.448	1.58074e+07	1.51267e+07	2.24609e+07	1.36036e+07	1.77073e+07	2.37625e+07	1.80159e+07	1.35243e+07	1.14979e+07	1.4762e+07	1.03253e+07	1.72357e+07	1.34814e+07	3.28694e+07	1.86072e+07	34807822	1.96329e+07
M_0032	L-(+)-Leucine	C6 H13 N O2	131.095	1.328	1.67829e+07	1.22236e+07	2.11387e+07	1.28472e+07	1.446e+07	1.4628e+07	1.43243e+07	15302689	1.02839e+07	1.82112e+07	1.12803e+07	1.71372e+07	1.49221e+07	3.46888e+07	1.64327e+07	8.13078e+06	7.54897e+06
M_0033	Indoline	C8 H9 N	119.074	2.444	1.46379e+07	1.39762e+07	2.08157e+07	1.26241e+07	1.64466e+07	2.21644e+07	1.69517e+07	1.25497e+07	1.0713e+07	1.37298e+07	9.56093e+06	1.59418e+07	1.25455e+07	3.05901e+07	1.72916e+07	3.25932e+07	1.8252e+07
M_0034	Υ-Aminobutyric acid (GABA)	C4 H9 N O2	103.064	1.061	665613	769111	757499	675463	540187	582446	684500	776179	962397	549785	805744	767505	780007	7.91206e+06	2.11958e+06	1.74626e+06	2.08628e+06
M_0035	L-(-)-Methionine	C5 H11 N O2 S	149.051	1.223	2.03317e+07	1.59188e+07	2.87333e+07	1.5895e+07	2.1824e+07	2.15563e+07	2.52657e+07	1.91677e+07	1.28678e+07	9.84434e+06	1.33577e+07	3.02818e+07	1.26473e+07	1.79544e+07	1.49079e+07	2.37038e+07	1.44315e+07
M_0036	1-O-Tetradecanoyl-D-glucitol	C20 H40 O7	392.279	8.486	2.05274e+07	1.63481e+07	1.34703e+06	1.09459e+06	1.49958e+07	1.79856e+07	1.86815e+07	2.36486e+07	2.96586e+07	1.59988e+06	1.80529e+07	1.64586e+07	814476	5.2216e+06	9.82015e+06	4.91274e+06	1.01302e+06
M_0037	Tryptamine	C10 H12 N2	160.1	1.697	18004	17156.5	23849.5	18177.8	18443.7	25305.3	21799.5	16628.5	14273.7	17776	16545.3	22346.4	17282.8	34710.2	21164.2	23858.9	18746.6
M_0038	3-Methylsulfolene	C5 H8 O2 S	132.025	1.221	1.97228e+07	1.54304e+07	2.75186e+07	1.53789e+07	2.11259e+07	1.82844e+07	2.44042e+07	1.8437e+07	1.2422e+07	9.42542e+06	1.28685e+07	2.87057e+07	1.19995e+07	1.75852e+07	1.45867e+07	2.22206e+07	1.38007e+07
M_0039	16(R)-HETE	C20 H32 O3	302.224	9.094	6.16465e+06	9.77247e+06	5.32797e+06	4.56694e+06	6.58869e+06	6.72169e+06	1.03331e+07	9.08042e+06	5.9785e+06	8.86347e+06	5.22174e+06	7.85347e+06	5.66865e+06	2.74972e+07	2.69968e+07	1.6723e+07	2.79836e+07
M_0040	(2Z,4Z)-6-Amino-2,4-diimino-5-nitro-1,3(2H,4H)-pyrimidinediol	C4 H6 N6 O4	202.045	1.223	1.17893e+07	1.59481e+06	2.8356e+07	2.45826e+06	3.18572e+06	1.06583e+06	550546	650770	2.69201e+06	2.49851e+07	1.85935e+07	3.79992e+06	1.38243e+07	1.34613e+06	5.25222e+06	9.18614e+06	1.00335e+06
M_0041	1-arachidonoyl-sn-glycero-3-phosphocholine	C28 H50 N O7 P	543.333	9.785	1.38031e+07	2.24309e+07	1.94098e+07	9.19029e+06	2.81674e+07	2.41196e+07	2.32888e+07	2.46604e+07	2.42671e+07	2.54098e+07	1.7393e+07	2.2969e+07	2.24231e+07	4.84734e+06	9.40247e+06	1.25481e+07	1.36781e+07
M_0042	8-{3-Oxo-2-[(2E)-2-penten-1-yl]-1-cyclopenten-1-yl}octanoic acid	C18 H28 O3	292.201	8.659	2.78704e+07	455694	2.04677e+07	1.17923e+07	5.90669e+06	2.15155e+06	1.46306e+07	8.68268e+06	60782.8	1.75544e+06	1.53146e+07	1.40109e+07	2.65692e+06	1.3887e+07	4.72488e+06	2.48617e+06	802585
M_0043	Choline Alfoscerate	C8 H20 N O6 P	257.103	1.118	8.26086e+06	8.9761e+06	6.09179e+06	8.81888e+06	1.2925e+07	9.3018e+06	1.24642e+07	1.02714e+07	9.95365e+06	1.42658e+07	1.14479e+07	9.05867e+06	1.21951e+07	3.73868e+06	1.79896e+07	8.6979e+06	9.5591e+06
M_0044	DL-Glutamine	C5 H10 N2 O3	146.069	1.105	1.86462e+07	2.01875e+07	1.71075e+07	1.52651e+07	1.98256e+07	1.63747e+07	2.18665e+07	2.30215e+07	2.34635e+07	1.86085e+07	2.54541e+07	2.66444e+07	2.20663e+07	2.24338e+07	1.50992e+07	1.22662e+07	1.6487e+07
M_0045	D-PANTOTHENIC ACID	C9 H17 N O5	219.111	3.322	1.25882e+06	1.62994e+06	1.46038e+06	1.14049e+06	4.91452e+06	2.67014e+06	3.1408e+06	3.52513e+06	2.93284e+06	2.81505e+06	4.82206e+06	1.92464e+06	1.97678e+06	2.55213e+07	1.08514e+07	2.53742e+07	1.27584e+07
M_0046	Edaravone	C10 H10 N2 O	174.079	6.032	22121	21635.7	21255.2	20512.8	20409.1	22000.9	21034.7	20624.5	21222.9	19363.7	21680.6	21253.2	21354.4	22398.6	21345.6	21218.8	22336
M_0047	L-(+)-Valine	C5 H11 N O2	117.079	1.024	82191	63095.2	678579	80256.4	982343	182302	95184.3	1.1868e+06	115220	76694.5	135491	95355	157552	84128.9	119151	93056.9	93127.6
M_0048	N-methylethanolamine phosphate	C3 H10 N O4 P	155.035	1.149	2.4823e+07	1.32279e+07	1.949e+07	1.70185e+07	6.08179e+06	6.80675e+06	4.15287e+06	7.61331e+06	1.41708e+07	5.30396e+06	9.10496e+06	9.30565e+06	5.61815e+06	4.43853e+06	9.25781e+06	4.49083e+06	5.53365e+06
M_0049	iodonitrotetrazolium	C H I N5 O2	241.918	0.984	1.74265e+07	2.41746e+07	2.33052e+07	2.06834e+07	1.36841e+07	6.0172e+06	1.25845e+07	1.60046e+07	1.30576e+07	1.18171e+07	9.74719e+06	6.16181e+06	1.09265e+07	1.32908e+07	1.32724e+07	1.06663e+07	1.40445e+07
M_0050	Benzoxazole	C7 H5 N O	119.037	6.121	115704	163155	123286	117949	64889.5	91850	119368	73768.6	72777.7	61675.5	85364.4	120037	165205	117917	40493.5	110428	116071
M_0051	L-Isoleucine	C6 H13 N O2	131.095	1.41	8.26545e+06	1.92934e+06	1.2209e+06	6.44462e+06	2.23044e+06	612930	3.09706e+06	9.96578e+06	3.66186e+06	2.31388e+06	1.82675e+06	7.19117e+06	3.05306e+06	803772	1.19936e+07	414686	302175
M_0052	Paracetamol	C8 H9 N O2	151.063	0.882	31751.7	28489.5	29412.8	33612.6	30508.7	31491.4	30584.8	29722.6	29538.4	29531.8	31213.8	30480	30816.8	31211.6	30911.9	30370.9	30587.4
M_0053	DL-Glutamine	C5 H10 N2 O3	105.043	1.108	1.45068e+07	1.61284e+07	1.41505e+07	1.24645e+07	1.70178e+07	1.43219e+07	1.87901e+07	1.96807e+07	1.98505e+07	1.58112e+07	2.13767e+07	2.29024e+07	1.90021e+07	1.90374e+07	1.27924e+07	1.08913e+07	1.39409e+07
M_0054	MNA	C7 H8 N2 O2	152.059	2.337	3.59819e+06	2.71481e+06	1.80049e+06	1.80809e+06	2.95053e+06	2.80669e+06	4.94846e+06	5.8911e+06	5.28061e+06	4.38227e+06	2.69356e+06	1.79687e+06	2.47264e+06	2.24329e+07	6.09878e+06	6.6737e+06	6.56637e+06
M_0055	Benzene	C6 H6	78.0472	2.46	1.46391e+07	1.39773e+07	2.08213e+07	1.26257e+07	1.64508e+07	767582	1.6953e+07	905140	1.0714e+07	660828	9.56187e+06	1.59439e+07	1.25503e+07	1.20581e+06	1.7293e+07	1.91864e+06	1.82551e+07
M_0056	(R)-3-Hydroxy myristic acid	C14 H28 O3	226.193	8.66	1.48208e+07	1.8657e+07	1.92216e+07	1.66515e+07	1.54074e+07	1.82161e+07	1.38811e+07	1.7552e+07	1.59177e+07	2.05438e+07	1.49722e+07	1.41645e+07	1.32492e+07	1.33312e+07	8.5936e+06	1.69727e+07	9.51516e+06
M_0057	Naphthalen-2-amine	C10 H9 N	143.074	1.737	12760.8	11700.1	18098.3	13308.6	13541.1	19474.9	16511.8	12420	9976.15	12786	12206.4	16686.7	12224.5	25500.2	16095.5	17143.7	14532.3
M_0058	5-Chloro-2-pentanone	C5 H9 Cl O	120.034	6.108	4937.85	4726.9	4816.33	4827.2	4687.53	4689.97	4810.17	4732.29	4854.85	4190.71	4813.56	4772.2	4809.64	5029.29	4772.65	4838.06	4863.05
M_0059	Betaine	C5 H11 N O2	117.079	1.401	1.15451e+07	5.49673e+06	1.17679e+07	8.72845e+06	8.6561e+06	1.6305e+07	6.85592e+06	6.32837e+06	6.17998e+06	5.972e+06	5.68836e+06	9.18055e+06	6.89288e+06	1.62167e+07	8.26187e+06	1.96739e+07	8.89692e+06
M_0060	g-Butyrobetaine	C7 H15 N O2	145.11	1.061	214036	207991	210340	160112	153871	122221	189381	114143	110677	163482	164215	107883	149564	113555	132347	270983	166524
M_0061	Betaine	C5 H11 N O2	117.079	1.48	1.69845e+06	2.69385e+06	5.29889e+06	7.3508e+06	3.28735e+06	4.95933e+06	2.29575e+06	3.82535e+06	4.9906e+06	3.03898e+06	2.72184e+06	5.82671e+06	3.48119e+06	1.62081e+07	3.14351e+06	5.40115e+06	8.98901e+06
M_0062	Betaine	C5 H11 N O2	117.079	1.528	3.01633e+06	2.54874e+06	5.90029e+06	2.94569e+06	6.28444e+06	8.38812e+06	4.94651e+06	3.82535e+06	8.85159e+06	3.03898e+06	6.24066e+06	9.9716e+06	3.48119e+06	1.62081e+07	3.14351e+06	5.40115e+06	8.98901e+06
M_0063	Hypoxanthine	C5 H4 N4 O	136.039	1.755	6.6901e+06	8.65191e+06	2.00305e+06	3.56707e+06	4.93563e+06	4.1703e+06	8.17176e+06	1.04292e+07	1.93957e+07	6.5428e+06	1.21595e+07	5.74836e+06	8.15067e+06	3.41063e+06	2.86449e+06	109597	2.50872e+06
M_0064	Serotonin	C10 H12 N2 O	176.095	1.497	1.75867e+06	1.2991e+06	2.49e+06	12600.2	1.9178e+06	3.13784e+06	2.23071e+06	876990	598060	1.44373e+06	1.80312e+06	2.31664e+06	1.73654e+06	2.33737e+06	2.96589e+06	3.21256e+06	7.08821e+06
M_0065	6-Methoxyquinoline	C10 H9 N O	159.068	1.528	1.753e+06	1.29386e+06	2.48408e+06	8453.49	1.91033e+06	3.12059e+06	2.22384e+06	871835	593821	1.43401e+06	1.79534e+06	2.30499e+06	1.72881e+06	2.31671e+06	2.92992e+06	3.15076e+06	6.93022e+06
M_0066	Taurine	C2 H7 N O3 S	125.015	1.119	1.03131e+07	1.81169e+07	1.00508e+07	1.2287e+07	1.04982e+07	1.01351e+07	1.32957e+07	1.58888e+07	1.18191e+07	1.27238e+07	1.32784e+07	1.44101e+07	1.05257e+07	1.79817e+07	1.21805e+07	7.56569e+06	1.4597e+07
M_0067	Choline	C5 H13 N O	103.1	1.167	2.04076e+06	2.63184e+06	1.50369e+06	1.25892e+07	1.04321e+07	5.83017e+06	1.80988e+07	1.09153e+07	1.52219e+06	1.66785e+07	5.47925e+06	1.65696e+06	1.67276e+06	1.72345e+06	1.44244e+07	1.88278e+06	2.7805e+06
M_0068	L-Norleucine	C6 H13 N O2	131.095	1.783	3.33907e+06	6.56044e+06	1.76574e+07	7.06804e+06	5.40268e+06	3.00022e+06	8.26973e+06	2.60844e+06	864715	3.82415e+06	1.33287e+06	6.7461e+06	2.41265e+06	1.26962e+07	8.45562e+06	7.00851e+06	6.38642e+06
M_0069	Choline	C5 H13 N O	71.0742	1.337	4.43572e+06	1.0885e+07	1.01259e+07	3.90134e+06	2.17248e+06	8.93691e+06	2.88602e+06	4.09855e+06	1.69254e+06	5.46449e+06	2.89586e+06	2.35808e+06	2.63239e+06	5.70168e+06	1.75031e+07	8.05579e+06	1.1257e+07
M_0070	2-Bromo-N-methyl-4-nitrobenzenesulfonamide	C7 H7 Br N2 O4 S	293.931	0.989	6.78813e+06	1.15828e+07	5.90674e+06	1.23924e+07	1.14896e+07	1.68702e+07	1.2021e+07	9.21023e+06	9.87823e+06	1.70829e+07	1.15223e+07	1.05409e+07	1.24737e+07	1.45587e+07	1.2012e+07	1.56444e+07	1.01734e+07
M_0071	Tetranor-12(S)-HETE	C16 H26 O3	248.175	8.656	1.13579e+07	1.51003e+07	1.52393e+07	1.33947e+07	1.23535e+07	1.49149e+07	1.10532e+07	1.43866e+07	1.29458e+07	1.63493e+07	1.19379e+07	1.13134e+07	1.05541e+07	1.03636e+07	2.06516e+06	1.33961e+07	7680572
M_0072	Choline	C5 H13 N O	103.1	10.459	5.65906e+06	1.61908e+07	6.09977e+06	4.38079e+06	6.70542e+06	4.09475e+06	4.94572e+06	4.37678e+06	4.74573e+06	4.86114e+06	3.49194e+06	2.88767e+06	2.56482e+06	253065	816460	1.6848e+06	2.25557e+06
M_0073	2-Aminonicotinic acid	C6 H6 N2 O2	138.045	6.099	2363.19	2214.97	2258.79	2263.89	2198.38	2199.53	2274.84	2219.38	2276.85	1965.38	2257.49	2290.1	2255.65	2358.66	2238.3	2268.98	2280.7
M_0074	1H-1,2,4-triazolo[4,3-b][1,2,4]triazole-3,6-diamine	C3 H5 N7	139.061	1.357	7.15065e+06	4.01267e+06	8.56532e+06	9.70179e+06	1.17274e+07	2.60745e+06	6.83277e+06	9.34063e+06	7.04105e+06	6.3557e+06	6.43445e+06	1.35093e+07	5.85884e+06	3.02108e+06	3.99934e+06	1.01606e+06	1.2553e+06
M_0075	TM0860000	C7 H16 N2	128.131	0.817	5.28617e+06	6.69586e+06	5.02097e+06	1.52347e+07	2.07768e+06	2.95407e+06	1.3345e+06	1.24799e+06	1.29688e+06	1.13701e+06	1.9662e+06	1.49157e+06	1.34517e+06	2.3353e+06	1.81947e+06	1.35748e+06	1.8971e+06
M_0076	Spermidine	C7 H19 N3	145.158	0.817	4.97169e+06	6.29534e+06	4.68744e+06	1.46891e+07	1.97323e+06	2.81607e+06	1.25749e+06	1.17747e+06	1.24957e+06	1.08544e+06	1.86576e+06	1.42462e+06	1.26977e+06	2.21219e+06	1.72209e+06	1.2882e+06	1.83065e+06
M_0077	Tryptamine	C10 H12 N2	160.1	2.629	10556.6	10515.5	10859.8	9806.81	9574.23	10156.5	10378.6	9756.88	9217.66	9604.12	9622.99	10715	9545.88	13385.9	10529	11311.8	10720.8
M_0078	Choline	C5 H13 N O	103.1	1.29	7.95217e+06	1.36807e+07	9.29277e+06	4.7749e+06	4.19931e+06	9.60018e+06	5.12168e+06	4.70678e+06	5.04187e+06	8.54767e+06	4.08642e+06	6.90419e+06	5.6633e+06	1.41539e+07	1.15709e+07	9.64069e+06	1.22567e+07
M_0079	1H-1,2,4-triazolo[4,3-b][1,2,4]triazole-3,6-diamine	C3 H5 N7	139.061	1.485	175500	53533.2	156715	157108	395061	183463	268965	110888	96786.4	96981.2	51784.8	77744.6	98630.8	29713	32264	175830	79914.6
M_0080	Acetyl-L-carnitine	C9 H17 N O4	203.116	1.096	1.1487e+07	1.36355e+07	1.23521e+07	1.2911e+07	6.95594e+06	8.38194e+06	9.18667e+06	7.59962e+06	7.15535e+06	8.97207e+06	8.60109e+06	6.73787e+06	8.1364e+06	7.74252e+06	4.26284e+06	4.03861e+06	5.57998e+06
M_0081	1962763	C11 H21 N O4	231.147	1.766	8.20051e+06	5.43872e+06	1.23555e+07	3.33831e+06	7.09745e+06	8.77607e+06	1.01156e+07	4.73301e+06	3.63925e+06	6.70918e+06	6.57475e+06	1.15214e+07	7.424e+06	7.58921e+06	9.72686e+06	4.83068e+06	1.33386e+07
M_0082	N-methylethanolamine phosphate	C3 H10 N O4 P	155.035	1.254	4.7937e+06	8.05832e+06	8.62433e+06	8.16449e+06	2.69168e+06	3.7304e+06	4.0387e+06	5.15789e+06	449403	5.30396e+06	9.10496e+06	4.73235e+06	2.64232e+06	967372	599838	407625	1.92769e+06
M_0083	1-Linoleoyl-sn-glycero-3-phosphocholine	C26 H50 N O7 P	519.333	9.683	4.77636e+06	3.1858e+06	3.7035e+06	1.30798e+07	4.37074e+06	3.47435e+06	53798.9	4.11681e+06	3.42354e+06	3.53699e+06	3.58829e+06	2.18097e+06	3.30885e+06	696453	51575.5	4.20135e+06	1.17704e+06
M_0084	Hypoxanthine	C5 H4 N4 O	136.039	2.256	3.10223e+06	940594	1.03937e+06	2.43957e+06	2.69807e+06	2.81678e+06	5.01707e+06	1.28081e+07	8.3177e+06	5.19614e+06	9.13236e+06	4.04402e+06	4.52552e+06	6.7475e+06	5.98611e+06	2.51552e+06	1.11122e+07
M_0085	3-Methylsulfolene	C5 H8 O2 S	132.025	1.368	1.63029e+06	1.40452e+06	3.32386e+06	1.78487e+06	2.77241e+06	1.26318e+07	2.89581e+06	5.177e+06	2.24993e+06	616930	1.64309e+06	3.93074e+06	4.96952e+06	905569	2.78113e+06	379508	1.54414e+06
M_0086	2-(Phenylthio)-1-[4-(1H-pyrrol-1-yl)piperidino]ethan-1-one	C17 H20 N2 O S	300.134	8.957	1.9672e+06	8.72561e+06	7.53627e+06	9.70392e+06	8.18627e+06	1.23615e+07	6.48614e+06	9.26775e+06	7.94888e+06	6.11632e+06	7.64051e+06	1.08312e+07	6.42506e+06	5.87964e+06	6.02682e+06	8.44414e+06	1.1752e+07
M_0087	Bis(4-ethylbenzylidene)sorbitol	C24 H30 O6	414.204	8.535	7.14999e+06	9.6499e+06	6.86885e+06	4.13362e+06	3.82165e+06	5.10049e+06	3.66224e+06	5.10201e+06	6.11585e+06	5.43968e+06	3.93221e+06	5.48867e+06	1.8393e+06	2.83005e+06	3.83772e+06	2.85887e+06	5.07087e+06
M_0088	DL-Lysine	C6 H14 N2 O2	146.106	0.813	5.62377e+06	5.64755e+06	9.45262e+06	5.98767e+06	3.81338e+06	4.68681e+06	3.66524e+06	3.38973e+06	3.26417e+06	2.84693e+06	3.07261e+06	5.71932e+06	3.31418e+06	1.22962e+07	3.97618e+06	4.93836e+06	3.24661e+06
M_0089	Pipecolic acid	C6 H11 N O2	129.079	0.809	5.58635e+06	5.60314e+06	9.39414e+06	5.94737e+06	3.78701e+06	4.64083e+06	3.65011e+06	3.36394e+06	3.23986e+06	2.82517e+06	3.0487e+06	5.67334e+06	3.28741e+06	1.21983e+07	3.94414e+06	4.89381e+06	3.22851e+06
M_0090	L-(-)-Methionine	C5 H11 N O2 S	149.051	1.362	1.81204e+06	1.5824e+06	3.52191e+06	2.13866e+06	3.1934e+06	1.21659e+07	2.97132e+06	5.26494e+06	2.39704e+06	1.04776e+06	2.00304e+06	3.68831e+06	5.32224e+06	1.4828e+06	3.42091e+06	111002	603551
M_0091	L-(-)-methionine	C5 H11 N O2 S	149.051	1.288	463602	251267	894890	302651	248822	1.20167e+07	480567	300948	335631	164971	421282	481556	187706	917454	294853	114036	178157
M_0092	Hippuric acid	C9 H9 N O3	179.058	5.331	5.92591e+06	3.01782e+06	5.03622e+06	1.90843e+06	3.39773e+06	4.04542e+06	4.49588e+06	913051	1.3363e+06	2.25386e+06	2.78765e+06	3.86951e+06	3.909e+06	3.47423e+06	5.87737e+06	1.20028e+07	6.30344e+06
M_0093	Octylbenzene	C14 H22	190.172	8.666	9.86281e+06	9.33325e+06	1.00313e+07	7.94772e+06	8.1132e+06	8.05321e+06	7.38758e+06	7.60244e+06	9.32143e+06	1.19697e+07	8.09546e+06	6.6848e+06	7.20765e+06	3.64534e+06	6.70486e+06	8.32497e+06	4.27746e+06
M_0094	2-Decylfuran	C14 H24 O	208.183	8.664	9.91838e+06	8.88438e+06	1.00331e+07	7.70673e+06	7.95723e+06	7.79971e+06	7.30361e+06	7.47785e+06	6.56731e+06	1.17814e+07	7.95677e+06	6.68051e+06	6.98733e+06	6.85721e+06	5.41261e+06	7.86456e+06	4.18415e+06
M_0095	Oleamide	C18 H35 N O	281.272	9.941	1.49519e+06	554383	207157	579175	8.62297e+06	1.09856e+07	5.76481e+06	922782	364905	2.62794e+06	1.4764e+06	60846.7	129533	429685	505021	999244	347883
M_0096	2,2,4-TRIMETHYL-1,3-PENTANEDIOL 1-ISOBUTYRATE	C12 H24 O3	216.172	8.625	3.59827e+06	3.10193e+06	3.66644e+06	3.28753e+06	3.76344e+06	4.93504e+06	2.72309e+06	3.21967e+06	3.44669e+06	3.81599e+06	5.58298e+06	4.72641e+06	2.64042e+06	2.6921e+06	2.85188e+06	3.83544e+06	9.31554e+06
M_0097	Muscimol	C4 H6 N2 O2	114.043	1.432	793006	1.06301e+07	4.51864e+06	3.18051e+06	1.21782e+06	1.73504e+06	2.09675e+06	3.5936e+06	1.45841e+06	950249	1.76131e+06	1.18043e+06	2.39764e+06	1.26229e+06	657216	380638	451819
M_0098	1-(4Z,7Z,10Z,13Z,16Z,19Z-docosahexaenoyl)-sn-glycero-3-phosphocholine	C30 H50 N O7 P	567.333	9.759	7.25471e+06	1.06196e+07	7.73796e+06	2.79798e+06	1.01071e+07	9.88419e+06	9.93104e+06	1.03804e+07	9.71478e+06	9.55495e+06	1.0467e+07	9.31746e+06	8.13148e+06	1.08639e+06	4.5774e+06	6.23577e+06	7.51946e+06
M_0099	Creatine	C4 H9 N3 O2	131.07	1.415	779009	1.04946e+07	4.32753e+06	3.0599e+06	1.27291e+06	1.71637e+06	2.01434e+06	3.67572e+06	1.47094e+06	933282	1.67668e+06	1.20679e+06	2.35691e+06	1.57131e+06	136926	457149	528501
M_0100	Prolinamide	C5 H10 N2 O	114.079	0.815	4.64364e+06	4.86542e+06	8.00655e+06	4.94191e+06	3.15221e+06	3.84034e+06	2.96174e+06	2.84979e+06	2.7593e+06	2.5231e+06	2.53989e+06	4.78152e+06	2.69229e+06	1.04438e+07	3.39623e+06	4.08946e+06	2.74704e+06
M_0101	bis(tetrazolyl)amine	C2 H3 N9	153.051	1.099	4.76697e+06	9.56751e+06	6.83903e+06	6.23636e+06	6.33266e+06	6.80325e+06	8.02426e+06	1.00865e+07	5.69769e+06	4.98356e+06	6.59118e+06	7.51305e+06	6.44473e+06	8.0823e+06	3.53753e+06	4.37744e+06	4.00935e+06
M_0102	DL-Carnitine	C7 H15 N O3	161.105	1.076	5.04872e+06	5.1792e+06	7.43111e+06	7.17803e+06	7.99868e+06	7.94905e+06	7.29226e+06	7.03719e+06	6.7282e+06	6.48705e+06	5.54172e+06	7.61753e+06	7.25102e+06	4.161e+06	4.91489e+06	6.45502e+06	6.05402e+06
M_0103	Hypoxanthine	C5 H4 N4 O	136.039	1.601	5.27033e+06	4.33506e+06	4.84585e+06	5.43916e+06	4.53253e+06	5.6517e+06	7.12397e+06	9.86315e+06	3.95083e+06	9.23436e+06	1.00226e+07	8.50768e+06	6.77675e+06	4.42057e+06	3.22939e+06	115000	2.46748e+06
M_0104	2-Ethoxy-4-hydrazino-6-(1-piperidinyl)-1,3,5-triazine	C10 H18 N6 O	238.154	8.621	3.12124e+06	2.8477e+06	3.38311e+06	3.09248e+06	3.45566e+06	4.56594e+06	2.42727e+06	3.06574e+06	3.25023e+06	3.48077e+06	5.01613e+06	4.28269e+06	2.31689e+06	2.46915e+06	2.52938e+06	3.5809e+06	8.40175e+06
M_0105	1728235	C19 H38 O4	330.277	9.848	9.75812e+06	7.2033e+06	7.48253e+06	9.20526e+06	3.92131e+06	3.76907e+06	4.17462e+06	5.6146e+06	6.53473e+06	4.1108e+06	5.96312e+06	5.16645e+06	3.75585e+06	9.04671e+06	5.60898e+06	7.04275e+06	3.6694e+06
M_0106	Betaine	C5 H11 N O2	76.0527	1.603	3.01633e+06	6.43233e+06	5.90029e+06	9.61274e+06	2.99709e+06	3.42879e+06	2.65076e+06	3.63642e+06	4.9906e+06	2.61745e+06	3.51882e+06	4.14489e+06	2.38061e+06	2.90714e+06	3.14351e+06	5.40115e+06	1.55711e+06
M_0107	Hypoxanthine	C5 H4 N4 O	136.039	2.024	780042	1.2012e+06	1.11741e+06	1.84944e+06	2.69002e+06	2.05924e+06	5.46087e+06	9.247e+06	3.9306e+06	4.18031e+06	9.5191e+06	2.97901e+06	2.07668e+06	804027	3.81928e+06	1.58378e+06	9.5837e+06
M_0108	Hypoxanthine	C5 H4 N4 O	136.039	2.119	219361	1.23732e+06	885787	1.40416e+06	199459	1.76811e+06	5.46087e+06	9.247e+06	3.9306e+06	4.18031e+06	9.5191e+06	2.97901e+06	2.07668e+06	6.7475e+06	3.81928e+06	1.56196e+06	426167
M_0109	D-(+)-Pipecolinic acid	C6 H11 N O2	129.079	1.208	2.50769e+06	2.77542e+06	2.39185e+06	2.23336e+06	3.07793e+06	3.71766e+06	4.38393e+06	3.01738e+06	2.95964e+06	3.39748e+06	3.28223e+06	3.41405e+06	4.27117e+06	9.47391e+06	523119	6.82031e+06	5.95182e+06
M_0110	L-Tyrosine	C9 H11 N O3	181.074	1.629	4.49686e+06	4.10157e+06	6.56103e+06	4.27481e+06	3.98559e+06	6.48204e+06	4.50367e+06	3.63983e+06	2.56344e+06	3.06021e+06	3.8532e+06	4.88134e+06	3.64919e+06	9.41388e+06	3.35899e+06	4.16471e+06	5.84178e+06
M_0111	Naphtho(2,3-b)thiophene-4,9-dione	C12 H6 O2 S	214.009	2.491	1.44666e+06	5.52115e+06	2.72155e+06	3.89407e+06	31923.3	1.58895e+06	3.88656e+06	1.6768e+06	963186	2.92919e+06	3.2433e+06	424179	1.72274e+06	156909	6.49026e+06	5.53894e+06	4.19801e+06
M_0112	1792831	C16 H30 O4	286.214	9.224	5.86437e+06	7.11284e+06	5.45199e+06	6.71706e+06	6.07722e+06	8.85564e+06	4.29837e+06	5.49039e+06	6.65003e+06	6.53395e+06	4.58464e+06	8.57654e+06	3.36561e+06	4.15835e+06	2.83379e+06	5.05719e+06	7.55413e+06
M_0113	nabilone	C24 H36 O3	372.266	8.814	1.70367e+06	756181	1.57799e+06	275785	129481	898406	28086.8	87260.3	645606	339225	958511	1.03218e+06	346942	407884	644010	3.27774e+06	9.12108e+06
M_0114	4-Morpholinylphosphonic difluoride	C4 H8 F2 N O2 P	171.025	11.317	7.21693e+06	906040	690406	580327	755992	469061	566826	1.00147e+06	256610	576235	1.05085e+06	322461	6.60316e+06	739574	766704	267897	6.23847e+06
M_0115	4-Indolecarbaldehyde	C9 H7 N O	145.053	7.54	14821.2	16220.4	13867	12467.2	11662.8	3221.05	13021.1	13061.3	14941.8	11954.3	11753.6	5476.98	10453.9	6269.55	15609.8	15408.3	15808
M_0116	Betaine	C5 H11 N O2	117.079	1.598	3.01633e+06	3.88359e+06	5.90029e+06	6.66705e+06	2.99709e+06	3.42879e+06	2.65076e+06	3.63642e+06	4.9906e+06	1.44001e+06	3.51882e+06	4.14489e+06	3.48119e+06	8.01582e+06	3.14351e+06	5.40115e+06	3.36779e+06
M_0117	4-Hydroxyisoleucine	C6 H13 N O3	147.09	1.206	3.17791e+06	3.48738e+06	3.09922e+06	3.0021e+06	3.65062e+06	4.39616e+06	4.79165e+06	3.67606e+06	3.62922e+06	4.02633e+06	3.93238e+06	4.22116e+06	4.96627e+06	8.75516e+06	5.00917e+06	6.55502e+06	5.80786e+06
M_0118	Koiganal II	C18 H32 O	264.245	9.947	1.24899e+06	415546	155652	454317	6.86021e+06	8.67187e+06	4.69752e+06	733419	292932	2.06064e+06	1.12753e+06	56869.7	114636	309705	360817	774845	294680
M_0119	2-Hydroxycinnamic acid	C9 H8 O3	164.047	1.631	3.93004e+06	3.71512e+06	5.74067e+06	3.83763e+06	3.59623e+06	5.66387e+06	4.05166e+06	3.30412e+06	2.29887e+06	2.86061e+06	3.60482e+06	4.45074e+06	3.33199e+06	8.64584e+06	3.06353e+06	3.58023e+06	5.37362e+06
M_0120	g-Butyrobetaine	C7 H15 N O2	145.11	1.246	53967.5	71820.6	109034	128672	47029.7	36391.6	79922.8	29736.8	25438.1	63742.5	24621.2	36999.4	40087.1	381584	193716	759936	1.06326e+06
M_0121	DL-Stachydrine	C7 H13 N O2	143.095	1.207	7.53349e+06	5.19972e+06	7.23721e+06	5.38387e+06	5.33818e+06	7.24201e+06	8.47796e+06	5.08905e+06	3.34624e+06	7.05638e+06	3.18134e+06	7.54553e+06	6.00714e+06	6.52317e+06	7.93934e+06	4.97999e+06	7.4409e+06
M_0122	g-Butyrobetaine	C7 H15 N O2	145.11	1.432	98172.6	25765.9	123205	97603.3	36412.7	65777.4	42171.1	34600.8	22415.1	46679.3	35215	25800.6	54620.9	391512	219780	224930	267617
M_0123	Eicosatetraynoic acid	C20 H24 O2	308.196	9.234	5.21116e+06	6.39934e+06	4.85292e+06	5.96801e+06	5.40536e+06	7.8744e+06	3.83274e+06	4.92613e+06	5.93113e+06	5.81653e+06	4.09375e+06	7.64096e+06	3.00691e+06	3.63405e+06	576274	4.49936e+06	6.74707e+06
M_0124	Nicotinamide	C6 H6 N2 O	122.048	1.386	6.23067e+06	8.11523e+06	4.37062e+06	4.92203e+06	2.90343e+06	2.29867e+06	3.8551e+06	5.12085e+06	3.22992e+06	3.35419e+06	3.28641e+06	2.38036e+06	2.82802e+06	1.04914e+06	1.6037e+06	497121	822798
M_0125	Pregabalin	C8 H17 N O2	159.126	1.089	1.88488e+06	1.47197e+06	1.56726e+06	1.54157e+06	1.27654e+06	2.58012e+06	1.35218e+06	1.25044e+06	1.23785e+06	3.50731e+06	7.90025e+06	1.3888e+06	1.11098e+06	908529	555465	763779	929095
M_0126	DL-Carnitine	C7 H15 N O3	161.105	1.394	1.73252e+06	2.07056e+06	2.11648e+06	1.83688e+06	2.15688e+06	5.81571e+06	2.01066e+06	1.45759e+06	2.1027e+06	2.40369e+06	782187	2.34529e+06	2.10332e+06	2.21738e+06	1.99003e+06	3.46008e+06	4.58021e+06
M_0127	Trigonelline	C7 H7 N O2	137.045	1.139	1.97767e+06	1.43892e+06	3.26626e+06	1.78348e+06	3.70509e+06	5.29194e+06	3.97287e+06	2.56411e+06	316144	1.95412e+06	2.34111e+06	4.37989e+06	815925	3.82117e+06	2.06582e+06	7.84246e+06	3.28631e+06
M_0128	Phenylacetylglycine	C10 H11 N O3	193.074	5.919	5.01449e+06	4.80788e+06	4.59942e+06	3.65302e+06	2.81632e+06	3.90461e+06	6.72941e+06	1.39284e+06	2.01808e+06	2.80114e+06	4.54045e+06	4.63491e+06	7.72986e+06	6.699e+06	2.20357e+06	6.43935e+06	7.02013e+06
M_0129	3,3,3-Trifluoropropanol	C3 H5 F3 O	114.03	1.201	3.38721e+06	5.13578e+06	1.63294e+06	2.457e+06	3.79447e+06	4.55405e+06	4.35272e+06	4.20488e+06	5.0205e+06	7.67591e+06	4.49241e+06	2.15379e+06	4.32828e+06	863313	1.55012e+06	1.03422e+06	2.22095e+06
M_0130	(1R,4aS)-7-(2-Hydroxypropan-2-yl)-1,4a-dimethyl-9-oxo-3,4,10,10a-tetrahydro-2H-phenanthrene-1-carboxylic acid	C20 H26 O4	330.181	8.762	776024	2.87525e+06	1.86037e+06	202968	5.42083e+06	7.41476e+06	4.76393e+06	5.63237e+06	4.19495e+06	4.71365e+06	5.08977e+06	7.65724e+06	3.79301e+06	3.14327e+06	4.39165e+06	3.81201e+06	3.60557e+06
M_0131	1962763	C11 H21 N O4	231.147	1.66	1.75552e+06	1.47607e+06	1.49782e+06	80552.3	33273.8	1.57809e+06	1.11721e+06	364167	3.63764e+06	2.02853e+06	54163.9	2.42632e+06	7.42226e+06	7.58614e+06	2.56369e+06	1.24608e+06	3.24521e+06
M_0132	CB0700000	C15 H12	192.095	3.412	18299.4	23459	23122	25701.1	24180	25531.1	21418.1	27685.1	25473.1	20802.1	20059.3	23265.4	20308.4	16875.5	20383.4	20838.1	24469.3
M_0133	Octylbenzene	C14 H22	190.172	8.772	6.43276e+06	22515.2	26341.2	18830.4	18350.5	16136.6	13920.3	193357	5.70629e+06	7.45236e+06	23713	188539	19353.8	25254.7	1.34279e+06	263914	8111.02
M_0134	1-[(9Z)-hexadecenoyl]-sn-glycero-3-phosphocholine	C24 H48 N O7 P	493.317	9.701	4.19437e+06	3.42142e+06	3.46402e+06	2.93973e+06	5.03248e+06	4.07733e+06	5.17945e+06	3.87748e+06	3.73729e+06	7.39231e+06	4.54569e+06	4.38609e+06	5.5085e+06	919439	2.43515e+06	4.14165e+06	4.98817e+06
M_0135	1-Phenyl-1,2,3,4-tetrahydroisoquinoline	C15 H15 N	209.121	3.409	21228.2	16964.4	17105.5	12978.3	17018.3	19098.7	15749.8	13776.7	15002	14869.9	14782.4	16713.2	14561.3	13051.1	14848	15788.8	17385.8
M_0136	DL-TYROSINE	C9 H11 N O3	181.074	1.239	5.46776e+06	5.87602e+06	5.59268e+06	4.71303e+06	4.65009e+06	4.02404e+06	3.66168e+06	4.12123e+06	2.58453e+06	2.03479e+06	2.59932e+06	4.7911e+06	2.81899e+06	4.05485e+06	2.36644e+06	2.49299e+06	3.642e+06
M_0137	2,6-Dioxo(4-~14~C)-1,2,3,6-tetrahydro-4-pyrimidinecarboxylic acid	C4 [14]C H4 N2 O4	158.02	1.617	2.33617e+06	2.9349e+06	2.47863e+06	4.11474e+06	3.54616e+06	5.9248e+06	3.04389e+06	4.31534e+06	3.6197e+06	4.47962e+06	236639	7.02258e+06	5.24617e+06	1.10629e+06	911264	547924	1.23351e+06
M_0138	Serotonin	C10 H12 N2 O	176.095	1.213	1.48307e+06	1.5091e+06	2.08608e+06	49460	1.94678e+06	2.75206e+06	1.97395e+06	908336	567400	1.14618e+06	1.40736e+06	1.75958e+06	1.23953e+06	5.86762e+06	4.38499e+06	3.1184e+06	7.00213e+06
M_0139	Caprolactam	C6 H11 N O	113.084	4.426	134735	133889	134772	117668	256032	2.40627e+06	256077	6.90484e+06	5.76389e+06	1.51385e+06	2.3213e+06	1.67457e+06	1.42609e+06	116811	65761.3	113297	97208
M_0140	Adenosine 5'-monophosphate	C10 H14 N5 O7 P	347.063	1.412	2.82689e+06	2.89443e+06	3.02128e+06	1.67661e+06	1.71769e+06	1.44413e+06	1.60088e+06	1.29225e+06	927269	1.64388e+06	1.32056e+06	1.99826e+06	1.93554e+06	16958.6	1.14481e+06	35401.2	2.28391e+06
M_0141	(2-Amino-3-hydroxybutanoyl)oxonium	C4 H10 N O3	120.065	1.422	1.21679e+06	1.05106e+06	1.21099e+06	1.51034e+06	927672	753486	1.26626e+06	587441	633096	1.03609e+06	1.09725e+06	793495	1.0449e+06	6.82111e+06	1.99777e+06	2.46123e+06	1.08321e+06
M_0142	6-Methoxyquinoline	C10 H9 N O	159.069	1.212	4.17286e+06	2.76351e+06	3.71498e+06	657896	2.37408e+06	3.44601e+06	2.71041e+06	1.40238e+06	935277	2.00721e+06	1.74246e+06	2.48644e+06	1.83937e+06	6.07552e+06	5.11007e+06	3.17592e+06	3.62319e+06
M_0143	quinolizidine	C9 H17 N	139.136	0.79	1.62438e+06	1.14595e+06	2.15972e+06	3.0329e+06	3.90485e+06	1.96685e+06	6.0532e+06	2.09649e+06	1.11859e+06	3.44558e+06	4.17431e+06	6.77165e+06	4.21614e+06	1.59405e+06	1.18537e+06	2.76324e+06	1.47742e+06
M_0144	L-Methionine sulfoxide	C5 H11 N O3 S	165.046	1.577	1.89172e+06	1.88323e+06	2.51088e+06	3.33865e+06	2.90167e+06	6.74853e+06	2.62151e+06	2.10815e+06	1.28331e+06	1.0928e+06	2.37287e+06	3.34203e+06	1.75586e+06	4.70014e+06	1.98448e+06	3.56177e+06	813705
M_0145	Hypoxanthine	C5 H4 N4 O	136.038	1.859	2.0383e+06	3.35876e+06	732618	1.84979e+06	2.38713e+06	2.4168e+06	4.10533e+06	6.74648e+06	5.61243e+06	3.37975e+06	4.85178e+06	4.15886e+06	1.99243e+06	2.88779e+06	294864	1.43921e+06	2.69506e+06
M_0146	Choline	C5 H13 N O	103.1	10.539	3.23773e+06	5.03887e+06	6.09977e+06	828515	6.70542e+06	1.20122e+06	258227	1.76401e+06	249818	1.64396e+06	565930	380795	408792	81140.3	136311	305128	464384
M_0147	2,2,6,6-Tetramethyl-4-piperidinamine	C9 H20 N2	156.163	0.789	1.61582e+06	1.13681e+06	2.14994e+06	3.00517e+06	3.86618e+06	1.94665e+06	6.00076e+06	2.07527e+06	1.11214e+06	3.41099e+06	4.12521e+06	6.69654e+06	4.16951e+06	1.5868e+06	1.17814e+06	2.73696e+06	1.47579e+06
M_0148	Creatine	C4 H9 N3 O2	131.07	1.594	1.96575e+06	4.71037e+06	267420	6.6255e+06	2.42803e+06	1.71137e+06	4.3982e+06	4.31516e+06	2.10208e+06	2.09915e+06	3.38467e+06	2.85673e+06	3.21343e+06	5.83496e+06	1.50751e+06	1.45271e+06	1.14484e+06
M_0149	(8S,9S)-6-[(2R)-1-hydroxypropan-2-yl]-8-methyl-9-[[methyl(pyridin-4-ylmethyl)amino]methyl]-10-oxa-1,6,14,15-tetrazabicyclo[10.3.0]pentadeca-12,14-dien-5-one	C22 H34 N6 O3	430.27	8.813	1.47954e+06	736760	1.33588e+06	208794	144469	812288	63627.6	109985	608411	283037	902296	861537	281174	313432	537798	1.91899e+06	6.60638e+06
M_0150	N,N-Bis(2-hydroxyethyl)dodecanamide	C16 H33 N O3	287.246	8.698	6.60426e+06	2.87347e+06	3.46477e+06	2.11051e+06	2.50654e+06	1.40151e+06	2.49567e+06	1.48537e+06	4.11971e+06	5.54847e+06	2.70291e+06	2.44453e+06	2.43611e+06	1.88098e+06	2.98512e+06	1.92187e+06	640199
M_0151	Choline	C5 H13 N O	103.1	1.401	2.81908e+06	4.99964e+06	5.42947e+06	3.67801e+06	1.86176e+06	2.6416e+06	2.59412e+06	2.46573e+06	3.34341e+06	5.23028e+06	2.96913e+06	2.05191e+06	2.24884e+06	5.46883e+06	6.50697e+06	801541	2.07364e+06
M_0152	(2S)-2-({N-[(2S)-2-Ammonio-4-methylpentanoyl]-L-leucyl}amino)-3-phenylpropanoate	C21 H33 N3 O4	391.247	8.66	277810	1.35628e+06	710689	2.20746e+06	285662	4.12999e+06	2.4742e+06	1.34093e+06	130627	1.37858e+06	783462	2.3823e+06	1.40405e+06	4.69567e+06	4.6834e+06	6.43375e+06	5.33117e+06
M_0153	L-(+)-Citrulline	C6 H13 N3 O3	175.096	1.108	4.04306e+06	3.47217e+06	3.78158e+06	2.34406e+06	2.46521e+06	2.48121e+06	3.11492e+06	3.05253e+06	2.74325e+06	2.84425e+06	2.97029e+06	3.24841e+06	2.70396e+06	6.42602e+06	3.63404e+06	2.03808e+06	4.25477e+06
M_0154	(E)-p-coumaric acid	C9 H8 O3	164.047	1.239	5.01743e+06	5.16264e+06	5.07451e+06	4.22315e+06	4.46609e+06	3.33788e+06	3.24571e+06	3.60179e+06	3.11702e+06	2.01019e+06	2.21412e+06	4.40715e+06	2.3677e+06	3.38931e+06	2.09375e+06	2.03449e+06	3.32934e+06
M_0155	1,3-Propanediolate	C3 H6 O2	74.0376	10.614	88926.7	4.00895e+06	2.34267e+06	3.00102e+06	4.52182e+06	5.34766e+06	5.36565e+06	4.93201e+06	5.48071e+06	5.13875e+06	5.44983e+06	5.35644e+06	5.67542e+06	5.63167e+06	5.65422e+06	145750	5.30579e+06
M_0156	4-Hydrazino-1H-pyrazolo[3,4-d]pyrimidin-6-amine	C5 H7 N7	165.077	1.202	3.63615e+06	2.92784e+06	4.10411e+06	3.84887e+06	3.98563e+06	4.98702e+06	6.28274e+06	3.7298e+06	2.51578e+06	5.11465e+06	2.34768e+06	5.41533e+06	4.5068e+06	2.79431e+06	5.23782e+06	2.96968e+06	4.44472e+06
M_0157	3-Thiomorpholinecarboxylic acid	C5 H9 N O2 S	147.035	1.566	1.82138e+06	1.81209e+06	2.41728e+06	3.03888e+06	2.7223e+06	6.22883e+06	2.46839e+06	2.06842e+06	1.30897e+06	996087	2.23788e+06	3.21581e+06	1.5983e+06	4.40847e+06	1.68503e+06	3.36649e+06	649934
M_0158	Diethoxyethylamine	C6 H15 N O2	133.11	1.07	158621	147376	118056	121637	36171	57629.7	102020	44532.5	81492.1	110139	290173	100100	92172.2	895758	6.19756e+06	163258	541177
M_0159	Trimethylamine N-oxide	C3 H9 N O	75.0684	1.079	57304	33545.5	41320.6	18098.7	8438.4	29342.3	74758.5	5757.89	5016.56	48184.8	57824.2	48283.2	65293.1	864438	6.13868e+06	154498	522331
M_0160	Phosphoric acid	H3 O4 P	97.9774	1.461	903791	1.28644e+06	952927	1.1085e+06	207033	713859	295864	6.11992e+06	5.6291e+06	293008	316118	173731	389640	741848	204508	222329	312676
M_0161	D-(+)-Pyroglutamic Acid	C5 H7 N O3	129.043	1.309	3.2763e+06	3.88429e+06	3.19063e+06	4.55262e+06	5.11866e+06	4.22477e+06	4.37548e+06	3.7394e+06	4.11388e+06	3.78509e+06	6.07218e+06	5.1e+06	4.64311e+06	4.46153e+06	2.60527e+06	1.70092e+06	2.40335e+06
M_0162	2,6-Dimethylpyrazine	C6 H8 N2	108.069	0.804	1.02386e+06	1.61117e+06	1.08795e+06	899458	1.35862e+06	1.30095e+06	1.50293e+06	1.02006e+06	991231	1.44075e+06	1.53815e+06	1.5692e+06	1.15368e+06	2.64829e+06	5.06741e+06	1.60487e+06	6.02701e+06
M_0163	N-(7-Butyl-8-hydroxy-4,9-dimethyl-2,6-dioxo-1,5-dioxonan-3-yl)-3-formamidosalicylamide	C21 H28 N2 O8	436.186	8.534	4.21487e+06	6.01422e+06	3.49298e+06	2.72667e+06	2.28659e+06	2.30877e+06	1.83907e+06	3.13032e+06	3.37822e+06	2.25482e+06	2.22086e+06	2.74668e+06	1.453e+06	2.03901e+06	2.39958e+06	1.72915e+06	2.79884e+06
M_0164	MFCD00037583	C5 [13]C H13 N O2	132.098	1.526	597298	2.51702e+06	4.79634e+06	99507.4	3.66878e+06	5.77773e+06	3.94206e+06	2.73165e+06	1.75911e+06	712648	2.56767e+06	4.41524e+06	4.24576e+06	2.06662e+06	5.7045e+06	900516	3.26549e+06
M_0165	Adenosine 5'-monophosphate	C10 H14 N5 O7 P	309.107	1.402	2.48463e+06	2.62381e+06	2.70345e+06	1.64751e+06	1.3772e+06	1.18872e+06	1.31003e+06	1.10569e+06	770739	1.34347e+06	1.0842e+06	1.60977e+06	1.60184e+06	31694	910025	33695.3	1.87716e+06
M_0166	2-Chloro-1,3,2-oxathiaphospholane	C2 H4 Cl O P S	141.941	1.266	2.63161e+06	4.27064e+06	1.68488e+06	1.66411e+06	1.96335e+06	4.9718e+06	2.20992e+06	1.6668e+06	1.96962e+06	2.27639e+06	1.86075e+06	1.31963e+06	3.69311e+06	5.74455e+06	1.5405e+06	1.05763e+06	1.68021e+06
M_0167	nabilone	C24 H36 O3	372.266	8.579	635168	686962	989748	231609	110496	236125	38235.2	116556	253331	539114	1.14053e+06	705004	549250	228912	230866	2.18164e+06	5.7186e+06
M_0168	1,1,2-Trimethyldisilane	C3 H12 Si2	104.048	1.988	3.15685e+06	5.66881e+06	3.27846e+06	4.03103e+06	1.44254e+06	2.02925e+06	2.41513e+06	1.43489e+06	1.91332e+06	2.51357e+06	3.07523e+06	1.47386e+06	3.77504e+06	5.26752e+06	2.7541e+06	1.82302e+06	2.00291e+06
M_0169	N-Methylhistamine	C6 H11 N3	125.096	0.806	936410	1.55201e+06	1.03639e+06	837649	1.28833e+06	1.22479e+06	1.37434e+06	947518	916165	1.33634e+06	1.44386e+06	1.45379e+06	1.08482e+06	2.45923e+06	4.72079e+06	1.50542e+06	5.61058e+06
M_0170	1-(4-Morpholinyl)-1-dodecanone	C16 H31 N O2	269.235	8.7	5.63798e+06	2.91858e+06	3.1511e+06	1.83505e+06	2.53864e+06	1.20638e+06	2.54262e+06	1.32355e+06	3.72419e+06	5.08703e+06	2.39051e+06	2.21482e+06	2.19434e+06	2.4557e+06	3.04884e+06	1.6842e+06	552083
M_0171	DL-Arginine	C6 H14 N4 O2	174.112	0.863	2.89993e+06	5.51678e+06	3.9768e+06	4.38749e+06	2.35222e+06	2.96536e+06	2.30497e+06	1.58471e+06	3.13633e+06	1.70042e+06	2.11788e+06	2.21126e+06	2.14152e+06	1.99671e+06	3.51801e+06	1.6485e+06	1.74672e+06
M_0172	DL-Arginine	C6 H14 N4 O2	174.112	1.059	1.45479e+06	4.40242e+06	4.3666e+06	3.106e+06	1.4301e+06	1.77463e+06	1.5546e+06	1.5342e+06	2.38547e+06	4.35256e+06	1.63699e+06	3.23958e+06	2.19962e+06	1.74632e+06	3.42023e+06	766233	2.28424e+06
M_0173	4-Nitro-N-(tetrahydro-2-furanylmethyl)benzamide	C12 H14 N2 O4	250.095	6.379	129873	203638	213190	136814	205144	183743	197404	109219	141705	151456	139321	151966	94367.7	5.60756e+06	661996	2.43251e+06	1.25529e+06
M_0174	Cyclopentadecanolide	C15 H28 O2	240.209	8.662	4.09161e+06	3.98689e+06	4.86304e+06	4.01962e+06	3.77617e+06	4.25434e+06	3.54652e+06	3.96286e+06	3.3653e+06	5.57984e+06	3.83603e+06	3.53977e+06	3.46674e+06	3.68897e+06	3.1875e+06	3.53862e+06	2.434e+06
M_0175	(2E,6E)-Farnesol	C15 H26 O	222.198	8.657	4.17161e+06	1.8711e+06	4.75643e+06	3.9625e+06	3.7167e+06	4.07715e+06	3.44953e+06	3.90528e+06	1.88692e+06	5.57305e+06	3.71893e+06	3.40695e+06	3.53169e+06	3.64691e+06	3.2203e+06	4.20446e+06	2.37396e+06
M_0176	6-Trifluoromethyloxindole	C9 H6 F3 N O	201.04	5.326	2.91437e+06	1.37578e+06	2.25356e+06	878445	1.60078e+06	1.86232e+06	2.05027e+06	436243	612539	258009	1.29052e+06	1.81699e+06	1.80959e+06	1.58029e+06	2.7307e+06	5.5476e+06	2.9456e+06
M_0177	Inosine	C10 H12 N4 O5	268.081	2.266	1.33032e+06	818948	630275	1.13691e+06	966977	920391	2.74332e+06	5.50578e+06	3.52967e+06	2.18055e+06	4.20069e+06	1.72512e+06	1.83324e+06	1.55871e+06	2.50338e+06	1.18749e+06	4.72504e+06
M_0178	2515	C16 H28 O2	252.209	8.699	5.48918e+06	2.86898e+06	3.0604e+06	1.78797e+06	2.46789e+06	1.16447e+06	2.47271e+06	1.28154e+06	3.62912e+06	4.95857e+06	2.32277e+06	2.15028e+06	2.13079e+06	2.414e+06	3.00024e+06	1.65931e+06	534020
M_0179	Phosphorodifluoridous hydrazide, trimethyl-	C3 H9 F2 N2 P	142.047	1.193	648591	706970	592175	432448	621588	771131	1.05523e+06	404537	469404	742543	638119	754555	762602	5.48303e+06	2.33676e+06	1.40911e+06	1.9499e+06
M_0180	DC2810000	C9 H12 O3	168.079	7.913	810554	1.17597e+06	2.29653e+06	208778	1.93148e+06	1.62113e+06	1.03377e+06	3.35896e+06	626700	1.02619e+06	1.72835e+06	637016	875492	313407	89144.4	2.34552e+06	98469.6
M_0181	5,7-Dihydroxytryptamine	C10 H12 N2 O2	192.09	1.535	1.83371e+06	2.54297e+06	3.35612e+06	36220.9	5.24644e+06	3.91319e+06	4.0823e+06	1.99306e+06	1.51806e+06	2.66038e+06	2.54046e+06	2.28062e+06	2.96754e+06	4.08306e+06	5.40527e+06	4.39361e+06	4.09811e+06
M_0182	144183	C11 H20 N2 O	196.157	8.598	587494	835655	1.03662e+06	188495	149496	317275	51255.2	134818	305293	494289	830358	524835	385946	204527	305503	3.28529e+06	5.32062e+06
M_0183	Tributyl phosphate	C12 H27 O4 P	266.165	8.89	3.06056e+06	3.82223e+06	3.59084e+06	4.1315e+06	3.63243e+06	5.30277e+06	2.89544e+06	4.55497e+06	4.08153e+06	3.65756e+06	4.14205e+06	4.82441e+06	3.22066e+06	3.31644e+06	2.79087e+06	4.36257e+06	3.57308e+06
M_0184	Acetyl-L-carnitine	C9 H17 N O4	203.116	1.272	1.08153e+06	3.88527e+06	3.0213e+06	4.60508e+06	552212	3.16856e+06	727515	522165	495211	2.31399e+06	885296	302476	787155	5.29556e+06	288078	2.23975e+06	964478
M_0185	DL-Carnitine	C7 H15 N O3	161.105	1.261	1.50317e+06	1.76356e+06	1.36868e+06	2.31094e+06	1.18055e+06	3.8069e+06	1.68064e+06	1.14002e+06	748387	1.29623e+06	703545	1.63928e+06	1.20306e+06	5.27685e+06	406144	5.27294e+06	2.02262e+06
M_0186	Edaravone	C10 H10 N2 O	174.079	1.534	1.7099e+06	2.39156e+06	3.00038e+06	36737.6	4.8815e+06	3.5465e+06	3.86776e+06	1.82613e+06	1.38449e+06	2.46469e+06	2.36401e+06	2.09768e+06	2.75748e+06	4.11815e+06	5.27584e+06	4.19194e+06	4.11966e+06
M_0187	Creatinine	C4 H7 N3 O	113.059	1.086	1.84203e+06	3.33777e+06	2.22561e+06	2.47627e+06	2.02393e+06	2.07412e+06	2.58137e+06	3.18632e+06	2.25946e+06	1.77424e+06	2.17268e+06	2.04583e+06	2.00224e+06	5.26606e+06	1.89881e+06	1.81866e+06	2.59451e+06
M_0188	2-linoleoyl-sn-glycero-3-phosphoethanolamine	C23 H44 N O7 P	477.286	9.313	1.81786e+06	2.75722e+06	1.65938e+06	1.1632e+06	2.29866e+06	3.32922e+06	4.06115e+06	3.25167e+06	2.28223e+06	2.58078e+06	2.09287e+06	3.41494e+06	1.6927e+06	547702	3.30367e+06	2.74676e+06	4.88883e+06
M_0189	D-(+)-Proline	C5 H9 N O2	115.064	1.345	3.21614e+06	2.20523e+06	4.08827e+06	2.55813e+06	3.63181e+06	5.01818e+06	3.40571e+06	3.19615e+06	2.0434e+06	1.86911e+06	3.02105e+06	4.73554e+06	2.46751e+06	1.65115e+06	1.57748e+06	2.85978e+06	1.92425e+06
M_0190	D-(+)-Proline	C5 H9 N O2	115.064	1.249	302123	670531	534838	488000	813404	5.01818e+06	1.01517e+06	623845	442011	344922	614821	4.73554e+06	434849	903583	353670	911035	1.92425e+06
M_0191	VS1150000	C18 H34 O4	314.246	8.73	5.17695e+06	788411	1.1205e+06	348795	1.29606e+06	1.40583e+06	1.43287e+06	1.07244e+06	2.06384e+06	538855	1.93466e+06	1.04759e+06	468660	2.00603e+06	1.63553e+06	966894	996527
M_0192	Nicotinamide	C6 H6 N2 O	122.048	1.431	182731	1.14299e+06	627805	431278	104759	62282.5	143930	5.12085e+06	3.22992e+06	83323.1	116835	88831.9	75336.1	24494.3	48418.2	28235	21877.3
M_0193	L-Phenylalanine	C9 H11 N O2	165.079	2.616	515153	423139	282331	166834	315974	423644	460209	2.85062e+06	399787	263432	2.04488e+06	281886	1.82974e+06	571920	320656	602231	470362
M_0194	Inosine-5'-monophosphate (IMP)	C10 H13 N4 O8 P	348.047	2.671	538335	4.94971e+06	2.46332e+06	1.24799e+06	153988	230798	210494	980691	200842	198491	274120	368841	494473	12243.4	83704.4	6458.33	92681.1
M_0195	Dimethylphosphoramidocyanidic acid	C3 H7 N2 O2 P	134.025	0.792	4.91906e+06	3.09916e+06	3.84815e+06	4.91372e+06	1.22974e+06	2.40312e+06	1.28363e+06	994470	571069	1.03737e+06	1.05879e+06	992359	862973	3.84431e+06	2.188e+06	1.69241e+06	3.60721e+06
M_0196	Adenosine 5'-monophosphate	C10 H14 N5 O7 P	347.063	1.222	4.50162e+06	2.97054e+06	4.60365e+06	4.28635e+06	2.0058e+06	1.85044e+06	1.69641e+06	1.17364e+06	978014	1.59108e+06	1.50491e+06	2.50125e+06	1.9947e+06	44439	1.14036e+06	38697.6	2.72449e+06
M_0197	DL-Carnitine	C7 H15 N O3	161.105	1.027	424400	1.11998e+06	1.84246e+06	4.88687e+06	217892	1.22236e+06	1.41155e+06	4.88068e+06	1.19118e+06	1.25386e+06	1.05271e+06	1.66023e+06	1.45577e+06	572703	1.07906e+06	1.46119e+06	85685.4
M_0198	DL-Carnitine	C7 H15 N O3	161.105	0.975	3.53017e+06	33272.9	68649	4.88687e+06	68803.9	1.22236e+06	1.41155e+06	4.88068e+06	1.19118e+06	49645.2	3.75078e+06	1.66023e+06	1.45577e+06	39957.8	1.07906e+06	1.46119e+06	33551.4
M_0199	6-Methyl-7H-[1,2,4]triazolo[4,3-b][1,2,4]triazole-3,7-diamine	C4 H7 N7	153.077	1.571	1.90225e+06	1.50406e+06	2.86644e+06	2.33299e+06	3.55477e+06	4.51539e+06	3.15616e+06	1.86538e+06	2.03542e+06	2.92988e+06	1.74815e+06	2.60463e+06	2.61562e+06	4.86795e+06	3.18932e+06	3.64286e+06	2.2532e+06
M_0200	N-Methyl-2-pyrrolidone	C5 H9 N O	99.069	2.971	105885	98508.6	288766	1.04515e+06	4.86542e+06	826625	448232	597445	469803	416001	979674	1.25013e+06	779584	1.24311e+06	411547	1.36445e+06	949032
M_0201	Embelin	C17 H26 O4	294.183	8.536	2.84004e+06	3.49974e+06	3.96239e+06	2.1735e+06	3.78673e+06	3.27216e+06	3.07319e+06	3.68929e+06	2.33621e+06	3.0035e+06	4.00943e+06	3.60731e+06	3.27469e+06	1.62504e+06	4.85663e+06	2.51703e+06	1.99754e+06
M_0202	2,4,7-Pteridinetriamine	C6 H7 N7	177.076	7.465	8315.29	7942.63	8205.97	8160.36	7835.24	8121.86	8252.02	8015.61	7835.89	7715.48	8138.37	8373.45	5931.83	6695.5	5027.27	4314.59	6246.44
M_0203	N'-(1-Methyl-4-nitro-1H-pyrazol-3-yl)-4-nitrobenzohydrazide	C11 H10 N6 O5	306.071	6.768	1.52678e+06	1.34938e+06	1.48249e+06	971826	964560	1.40256e+06	1.02095e+06	292614	475452	553532	1.5298e+06	1.0377e+06	1.85966e+06	1.70346e+06	410400	2.40091e+06	4.8132e+06
M_0204	Valine	C5 H11 N O2	117.079	1.293	1.76001e+06	2.12908e+06	2.93028e+06	2.01537e+06	1.93831e+06	4.60197e+06	1.65472e+06	1.59174e+06	2.30783e+06	1.68543e+06	1.39503e+06	2.17299e+06	1.81352e+06	2.24913e+06	2.14889e+06	4.80931e+06	3.28356e+06
M_0205	1-Adamantanol	C10 H16 O	152.12	8.667	3.91581e+06	3.66068e+06	4.08011e+06	3.16926e+06	1.9438e+06	3.1103e+06	2.71363e+06	2.95423e+06	3.67987e+06	4.80494e+06	2.97637e+06	2.83803e+06	2.87553e+06	2.928e+06	2.65732e+06	1.77887e+06	1.62666e+06
M_0206	Allantoin	C4 H6 N4 O3	158.044	1.176	473370	743947	725913	593305	842420	783698	873980	874899	819013	940059	928353	633578	1.01931e+06	4.80046e+06	1.94287e+06	2.16309e+06	2.28428e+06
M_0207	Indole-3-acetic acid	C10 H9 N O2	175.063	7.47	311114	210139	565242	92958.4	463811	882692	438244	136278	188221	458897	508450	1.03696e+06	210022	388121	327298	414964	452496
M_0208	Indole-3-lactic acid	C11 H11 N O3	205.074	7.262	727627	767452	903911	873124	610333	718550	868635	417733	489509	672321	465782	567412	257785	3.62489e+06	1.41002e+06	2.07397e+06	2.37043e+06
M_0209	hodgkinsine	C33 H38 N6	518.318	10.251	3.2693e+06	874596	522685	1.88017e+06	802849	2.73281e+06	755958	3.74853e+06	3.0979e+06	1.57252e+06	3.61377e+06	2.43825e+06	1.09816e+06	1.20866e+06	2.17435e+06	743796	2.10117e+06
M_0210	2,6-Dioxo(4-~14~C)-1,2,3,6-tetrahydro-4-pyrimidinecarboxylic acid	C4 [14]C H4 N2 O4	158.02	1.744	867020	13754.1	807186	833519	1.32765e+06	128127	2.8804e+06	3.48967e+06	4.00521e+06	3.02918e+06	4.72145e+06	1.00268e+06	1.09663e+06	1.10629e+06	942184	56517.3	889580
M_0211	2H-Pyran-2,4,6(3H,5H)-trione	C5 H4 O4	128.011	2.132	578028	2.17072e+06	27717.5	1.47768e+06	22474.1	1.63875e+06	1.93374e+06	701571	18292.6	1.6976e+06	18556.8	1.19813e+06	628701	4.57579e+06	380359	40989.3	4.71224e+06
M_0212	D-(+)-Pyroglutamic Acid	C5 H7 N O3	129.043	1.791	1.29236e+06	4.70572e+06	1.2251e+06	1.67902e+06	1.66601e+06	1.44031e+06	2.3489e+06	2.03436e+06	1.75044e+06	1.72945e+06	4.18586e+06	2.13278e+06	2.13592e+06	1.91157e+06	2.85927e+06	1.67402e+06	1.8747e+06
M_0213	Pregabalin	C8 H17 N O2	159.126	1.257	564868	565018	853552	786315	210637	399590	609572	368832	450827	581619	4.67529e+06	260521	417671	1.41944e+06	283912	1.25695e+06	332945
M_0214	Muscimol	C4 H6 N2 O2	114.043	1.295	2.65443e+06	2.40525e+06	2.60591e+06	3.11844e+06	4.16596e+06	3.77151e+06	3.13664e+06	3.15996e+06	3.08995e+06	3.11982e+06	4.67141e+06	4.21927e+06	3.90731e+06	3.66164e+06	2.24579e+06	1.74493e+06	2.14419e+06
M_0215	lysophosphatidylethanolamine (0:0/22:6(4Z,7Z,10Z,13Z,16Z,19Z))	C27 H44 N O7 P	525.286	9.276	1.14902e+06	3.33125e+06	975876	980148	3.18175e+06	3.18389e+06	3.17149e+06	3.6065e+06	4.66053e+06	3.70368e+06	2.66139e+06	2.29383e+06	1.53429e+06	378251	1.4691e+06	1.15193e+06	2.19893e+06
M_0216	Drospirenone	C24 H30 O3	366.217	9.081	692925	1.51736e+06	409056	642442	445566	484373	721353	967882	883008	1.30233e+06	438542	411688	467402	4.64436e+06	1.75941e+06	656084	1.89339e+06
M_0217	3,5-Dimethylpyrazole	C5 H8 N2	96.069	0.798	4.55772e+06	2.85865e+06	3.60296e+06	4.64111e+06	1.15316e+06	2.26497e+06	1.19157e+06	944241	530375	963094	986052	940419	808871	3.55667e+06	2.049e+06	1.583e+06	3.4253e+06
M_0218	Octahydro-1,2,8-indolizinetriol	C8 H15 N O3	173.105	6.744	689205	336090	1.19773e+06	900660	785033	1.52773e+06	1.07246e+06	505720	199163	302368	376189	748072	263049	4.60809e+06	783262	1.01806e+06	1.22734e+06
M_0219	17α-Methyl-androstan-3-hydroxyimine-17β-ol	C20 H33 N O2	319.249	8.907	70797.9	32167.1	48994.9	37549	4.5408e+06	349067	4.5896e+06	83456.7	40522.6	115864	93278.8	7493.31	38462.7	38807.6	46091.4	59539	43745.1
M_0220	DL-Glutamine	C5 H10 N2 O3	146.069	1.316	2.56429e+06	2.38612e+06	2.49085e+06	463489	4.11241e+06	3.72812e+06	3.08118e+06	3.09556e+06	3.03665e+06	3.07833e+06	4.58318e+06	4.16184e+06	3.85259e+06	2.63749e+06	750967	514729	1.96196e+06
M_0221	1913256	C18 H30 O	262.23	8.913	78573.7	93249.6	76065	52314.9	4.55774e+06	425886	3.44746e+06	131173	72592.5	123350	145887	80151	69003.9	65037.2	79461	113742	72975.9
M_0222	trans,trans-2,4-Heptadienal	C7 H10 O	110.074	8.27	210650	260695	580705	399213	952726	1.11447e+06	1.62083e+06	1.08673e+06	392595	1.36272e+06	1.75702e+06	1.02599e+06	268811	220242	122766	164160	134571
M_0223	1-(3-Azido-2,3-dideoxypentofuranosyl)-5-methyl-2,4(1H,3H)-pyrimidinedione	C10 H13 N5 O4	267.097	1.61	7226.19	14032.5	9861.5	30581.8	894429	285528	505294	236706	183874	221438	519906	415386	515398	24878.6	394235	215528	895452
M_0224	DL-Homoserine	C4 H9 N O3	87.0323	1.104	3.7235e+06	3.31129e+06	4.50081e+06	3.48571e+06	2.76544e+06	3.24097e+06	3.16904e+06	3.59489e+06	2.99028e+06	2.12475e+06	2.81255e+06	3.29498e+06	3.33965e+06	3.80187e+06	2.11144e+06	2.78786e+06	1.78037e+06
M_0225	Isatin	C8 H5 N O2	147.032	4.898	50802.7	30103.1	33485	41129.8	25637.1	26788.2	24079.9	23619.7	22997.9	24520.1	28488.9	27276.4	29906.6	25957.2	26493.7	27136.2	38735.4
M_0226	3-Decyldihydro-2,5-furandione	C14 H24 O3	240.173	8.811	704556	955916	374674	960776	442725	468179	690477	658377	746888	1.03816e+06	554460	160740	691462	4.3974e+06	476791	142714	509933
M_0227	Acetyl-L-carnitine	C9 H17 N O4	203.116	1.422	4.18916e+06	4.39611e+06	2.74089e+06	3.9452e+06	1.44314e+06	1.68481e+06	2.82498e+06	1.67394e+06	1.37996e+06	2.76868e+06	1.97038e+06	1.83113e+06	3.7406e+06	1.5578e+06	1.34321e+06	518892	1.80613e+06
M_0228	Diethylpyrocarbonate	C6 H10 O5	162.053	1.145	2.95301e+06	2.31776e+06	2.76095e+06	3.06437e+06	3.07469e+06	4.38059e+06	3.16432e+06	3.42229e+06	3.4923e+06	3.53001e+06	4.03539e+06	3.59517e+06	2.07693e+06	474158	1.31514e+06	2.90481e+06	1.00463e+06
M_0229	DL-Homoserine	C4 H9 N O3	119.059	1.105	3.6132e+06	3.21321e+06	4.3774e+06	3.15361e+06	2.42019e+06	2.91203e+06	2.77385e+06	3.29116e+06	2.72525e+06	1.8893e+06	2.38536e+06	2.67474e+06	2.99816e+06	3.48467e+06	1.80978e+06	2.68249e+06	1.44691e+06
M_0230	Linoleamide	C18 H33 N O	279.256	8.913	35704.8	45530.8	33805.1	19871.1	4.34514e+06	362757	3.26787e+06	83296.2	32596.2	82644.3	109079	6671.96	38505.3	28804.9	40500.5	48366.2	32447.6
M_0231	Choline	C5 H13 N O	103.1	1.531	891159	4.29499e+06	839773	2.04797e+06	1.19102e+06	1.59824e+06	3.21953e+06	1.0386e+06	2.14361e+06	1.57765e+06	2.82742e+06	2.77923e+06	1.2763e+06	1.60523e+06	2.41627e+06	1.44199e+06	2.15827e+06
M_0232	DL-Glutamine	C5 H10 N2 O3	146.069	1.23	870711	2.38612e+06	220750	2.61482e+06	1.40874e+06	1.41026e+06	111848	1.15469e+06	1.28474e+06	138786	3.8878e+06	1.52332e+06	914999	992124	476907	1.17014e+06	1.96196e+06
M_0233	Vigabatrin	C6 H11 N O2	129.079	1.104	121250	46009.5	199196	2.12875e+06	80020.4	3.38429e+06	70621.2	82155.8	73516.8	66905.5	79489.1	125167	74626.7	201214	71418.3	88252.2	75028.4
M_0234	4-Nonanoylmorpholine	C13 H25 N O2	227.189	8.31	2.11936e+06	2.19009e+06	2.57324e+06	1.66073e+06	1.82251e+06	3.53912e+06	1.9726e+06	1.78648e+06	1.75066e+06	1.46095e+06	2.18919e+06	2.33264e+06	1.54091e+06	1.55828e+06	1.89711e+06	1.64483e+06	1.02207e+06
M_0235	2683	C11 H10 N4 O6	294.059	1.682	1.25636e+06	2.40305e+06	1.13106e+06	921737	1.17237e+06	1.62618e+06	2.85487e+06	3.00298e+06	3.14606e+06	4.2442e+06	2.58631e+06	3.63914e+06	4.03821e+06	370337	599882	5735.85	788007
M_0236	N4-(2,2-DIMETHYL-1-METHYLCARBAMOYL-PROPYL)-2,N1-DIHYDROXY-3-ISOBUTYL-SUCCINAMIDE	C15 H29 N3 O5	331.211	4.266	4.23151e+06	6865.13	226391	413472	4884.38	5099.39	4999.34	4810.03	4960.32	5022.12	4904.8	4904.12	4917.9	5582.17	5199.01	5120.75	5139.73
M_0237	Pyridoxamine	C8 H12 N2 O2	168.087	0.983	793767	839372	1.4733e+06	745592	764574	1.08136e+06	793701	640846	536970	647662	759437	1.35963e+06	624728	4.21125e+06	1.04722e+06	1.15567e+06	542825
M_0238	1-arachidonoyl-sn-glycero-3-phosphoethanolamine	C25 H44 N O7 P	501.286	9.289	1.35281e+06	2.98592e+06	1.18531e+06	1.29269e+06	2.99772e+06	3.17851e+06	3.72941e+06	3.64128e+06	4.1875e+06	3.40571e+06	3.04119e+06	2.99838e+06	2.03006e+06	702646	1.91143e+06	1.29431e+06	3.31437e+06
M_0239	DL-Arginine	C6 H14 N4 O2	174.112	0.956	2.18562e+06	361176	1.06072e+06	1.33211e+06	1.42667e+06	3.11186e+06	1.06379e+06	472709	1.40017e+06	1.98556e+06	663243	406182	1.10708e+06	908464	1.19157e+06	128820	759138
M_0240	AC-VAL-OH	C7 H13 N O3	159.09	4.577	820205	575048	898222	596718	560528	586811	760330	277921	129894	592896	724102	827643	1.01981e+06	4.1585e+06	451019	416553	853791
M_0241	Trigonelline	C7 H7 N O2	137.048	1.159	729399	580978	758698	795921	756777	1.15372e+06	1.56464e+06	994328	549711	821521	517394	890464	694466	3.60909e+06	4.15491e+06	4.02679e+06	2.40189e+06
M_0242	4H-Benzotriazol-4-one	C6 H3 N3 O	133.028	0.79	4.10367e+06	2.69022e+06	3.38725e+06	4.05548e+06	1.05433e+06	2.0749e+06	1.11641e+06	852280	472057	878787	901389	900153	737542	3.31525e+06	1.96184e+06	1.39715e+06	3.0602e+06
M_0243	7-ketodeoxycholic acid	C24 H38 O5	406.272	8.507	851847	463709	886209	115223	265667	188318	334050	15961.2	297709	357388	919112	705690	108125	145775	132638	357354	4.09728e+06
M_0244	5-(Nitroimino)hexahydroimidazo[4,5-d]imidazol-2(1H)-one	C4 H6 N6 O3	186.05	1.197	1.89133e+06	2.36216e+06	2.22737e+06	1.81493e+06	2.32653e+06	4.08362e+06	2.90725e+06	2.21632e+06	2.74178e+06	3.86079e+06	3.6576e+06	2.65033e+06	3.66189e+06	1.03833e+06	1.50156e+06	846991	1.79152e+06
M_0245	D-(+)-Pyroglutamic Acid	C5 H7 N O3	129.043	1.109	2.73136e+06	2.97976e+06	2.59346e+06	2.24949e+06	3.06489e+06	2.29994e+06	3.14977e+06	3.46141e+06	3.68593e+06	2.78981e+06	3.92534e+06	3.80407e+06	3.11894e+06	2.81462e+06	2.28868e+06	1.74342e+06	2.29422e+06
M_0246	Methyl indole-3-acetate	C11 H11 N O2	189.079	7.817	3.33784e+06	2.58526e+06	3.79059e+06	1.83717e+06	1.37227e+06	2.37271e+06	2.57356e+06	1.10679e+06	441169	2.13938e+06	2.23585e+06	2.7965e+06	1.96565e+06	1.20648e+06	3.35895e+06	1.4249e+06	4.05399e+06
M_0247	Adenosine 5'-monophosphate	C10 H14 N5 O7 P	347.063	1.391	2.82312e+06	2.8905e+06	3.01792e+06	1.81746e+06	1.71491e+06	1.44133e+06	1.59741e+06	1.2892e+06	927167	1.64077e+06	1.31752e+06	1.99485e+06	1.93258e+06	13436.1	1.14187e+06	33420.9	2.28133e+06
M_0248	octyl methoxycinnamate	C18 H26 O3	290.188	8.767	322275	1.37517e+06	913779	55579	2.81614e+06	3.40545e+06	1.9272e+06	2.52624e+06	1.98502e+06	2.48883e+06	2.67729e+06	3.97864e+06	1.509e+06	1.62361e+06	2.19477e+06	1.71192e+06	1.86644e+06
M_0249	1-[(8Z,11Z,14Z)-icosatrienoyl]-sn-glycero-3-phosphocholine	C28 H52 N O7 P	545.349	10.099	2.76766e+06	2.91489e+06	2.26557e+06	687167	3.79212e+06	2.40783e+06	2.85979e+06	2.709e+06	2.28672e+06	3.96367e+06	1.5274e+06	2.96242e+06	2.25994e+06	101819	1.041e+06	697287	2.11277e+06
M_0250	N(1)-acetylspermidine	C9 H21 N3 O	187.168	0.804	169215	113895	141342	163886	102490	100869	103769	59386.8	81981.9	96414	74863.8	87712.5	101804	3.96314e+06	216753	151748	288915
M_0251	DC2810000	C9 H12 O3	168.079	7.632	1.09724e+06	1.91698e+06	1.06064e+06	503655	253873	82167.6	2.91939e+06	3.91581e+06	3.73375e+06	2.2178e+06	2.17367e+06	2.1843e+06	282789	121344	129344	1.41226e+06	1.42963e+06
M_0252	3b-Hydroxy-5-cholenoic acid	C24 H38 O3	374.282	9.152	524576	710800	388821	204882	74280.7	378006	117626	116183	283074	358781	931798	461137	546703	147609	417270	1.63132e+06	3.91355e+06
M_0253	Choline	C5 H13 N O	103.1	10.349	3.8981e+06	167006	705102	490205	135613	434835	459401	536700	82418.5	422091	402821	415711	516876	10926.3	409944	211395	130042
M_0254	3-Thiomorpholinecarboxylic acid	C5 H9 N O2 S	147.035	1.454	1.44065e+06	1.46453e+06	3.00646e+06	2.71217e+06	2.06403e+06	3.28912e+06	2.29266e+06	1.2404e+06	371818	793712	699083	2.98549e+06	1.06846e+06	579320	1.68089e+06	1.44531e+06	566542
M_0255	4-Hydroxyindole	C8 H7 N O	133.053	4.883	3850.2	3803.41	4615.46	4493.12	3796.56	3616.05	3612.26	5031.18	4646.59	4988.04	3720.37	5257.34	3721.99	3836.42	4707.57	5514.73	3863.17
M_0256	3,3,3-Trifluoropropanol	C3 H5 F3 O	114.03	1.027	811283	1.44164e+06	757864	1.32352e+06	950219	558029	741034	928186	1.00415e+06	125385	662410	770711	790475	688649	919080	618196	436191
M_0257	MEGA-9	C16 H33 N O6	335.231	8.727	3.81883e+06	916306	766161	710637	944675	1.04553e+06	1.18872e+06	790907	1.46043e+06	839737	1.34102e+06	818371	1.44956e+06	1.30355e+06	1.17618e+06	721949	823175
M_0258	butyl acrylate	C7 H12 O2	128.084	7.763	167506	254697	212986	140845	1.74942e+06	1.69576e+06	3.59854e+06	3.79921e+06	942569	1.54071e+06	1.98693e+06	2.03518e+06	535588	116356	1.32059e+06	1.17819e+06	1.26188e+06
M_0259	Diethanolamine	C4 H11 N O2	105.079	0.954	26015.1	25894.6	27466	28643	29804.1	28847.2	28603	27593.8	28353.9	28541.8	21164.2	29488	22225.9	29584.6	29006.2	30472	28657.4
M_0260	L-Glutamic acid	C5 H9 N O4	147.053	1.109	2.83159e+06	3.75798e+06	2.56736e+06	2.21384e+06	1.14383e+06	1.17023e+06	2.02186e+06	2.50147e+06	1.34971e+06	1.446e+06	2.10798e+06	1.44017e+06	1.54386e+06	876067	1.85266e+06	472591	903148
M_0261	FZ5600000	C27 H44	368.344	9.277	17159.2	2.01167e+06	761660	1.11701e+06	85320.4	1.82966e+06	1.46671e+06	1.37078e+06	2.08443e+06	3.14616e+06	1.89745e+06	1.31862e+06	2.602e+06	2.57413e+06	653299	963092	1.14566e+06
M_0262	Pregabalin	C8 H17 N O2	159.126	1.432	1.10399e+06	940026	1.03592e+06	1.35119e+06	763356	1.12893e+06	851647	663113	469380	3.65774e+06	2.9284e+06	739874	560951	2.65464e+06	1.34875e+06	1.91512e+06	1.59602e+06
M_0263	Xanthine	C5 H4 N4 O2	152.033	2.03	570136	1.58659e+06	648150	771847	670787	822701	1.25759e+06	1.20638e+06	949546	1.43159e+06	1.4137e+06	1.29363e+06	1.33895e+06	3.63659e+06	2.28252e+06	447990	2.50348e+06
M_0264	1-Allyl-4-{(2,5-dimethoxyphenyl)[1-(tetrahydro-2-furanylmethyl)-1H-tetrazol-5-yl]methyl}piperazine	C22 H32 N6 O3	428.254	8.5	734498	377194	810753	140859	6446.56	203976	5388.17	24035.1	127051	170860	839677	574164	118140	78005.6	79808.6	660232	3.62503e+06
M_0265	6-Phenoxynicotinic acid	C12 H9 N O3	215.056	5.909	2.26703e+06	2.20027e+06	2.07196e+06	1.68249e+06	1.33805e+06	1.83703e+06	3.15591e+06	672601	1.04462e+06	1.35027e+06	2.12533e+06	1.96665e+06	3.61888e+06	3.01074e+06	1.01754e+06	3.03015e+06	3.24106e+06
M_0266	Kojic acid	C6 H6 O4	142.024	1.136	1.98231e+06	2.60428e+06	3.29022e+06	2.63706e+06	2.75587e+06	2.8668e+06	2.31493e+06	2.88964e+06	2.04265e+06	2.92444e+06	3.35791e+06	2.44793e+06	2.77057e+06	1.38685e+06	2.34019e+06	2.83809e+06	1.43679e+06
M_0267	2050867	C12 H23 N O4	245.163	2.81	797682	894449	1.41872e+06	613259	668302	1.20842e+06	936973	404955	211417	567545	926836	1.2609e+06	813269	3.55921e+06	1.52192e+06	1.77093e+06	2.97849e+06
M_0268	L-gamma-Glutamyl-L-leucine	C11 H20 N2 O5	260.137	4.342	2.00456e+06	1.56309e+06	2.43514e+06	1.66728e+06	1.56644e+06	3.54859e+06	2.5864e+06	1.28057e+06	533270	1.17117e+06	1.51539e+06	2.14257e+06	1.62433e+06	3.03472e+06	2.38507e+06	3.14268e+06	2.45589e+06
M_0269	Creatine	C4 H9 N3 O2	131.07	1.456	823712	313853	2.81192e+06	1.11907e+06	308762	370051	1.88126e+06	3.53438e+06	1.37845e+06	838515	1.57136e+06	1.11023e+06	493456	534242	200701	163341	281121
M_0270	1-[2-Hydroxy-3-(phenylthio)propyl]piperidine-4-carboxamide	C15 H22 N2 O2 S	294.144	8.327	644363	567512	634755	442706	3.43928e+06	790243	517414	310998	375330	630067	399118	395938	257518	195492	42154.2	106286	21968.4
M_0271	Coenzyme Q1	C14 H18 O4	250.118	7.571	58571.3	1.18627e+06	869205	227747	472641	572345	636649	320669	180102	3.41379e+06	758018	762501	16900.2	25744.3	1.25894e+06	17748.6	1.46205e+06
M_0272	4,4'-Methylenebis[2-tert-butyl-6-(.alpha.-methylbenzyl)phenol]	C37 H44 O2	520.336	8.916	3.40029e+06	68308.2	50442.1	12083.3	41047.2	2.69313e+06	62788.8	57515.7	61016.9	46098.1	39507.4	56549.1	47475.1	39408.7	42805	35191	68845.6
M_0273	4,4'-Methylenebis[2-tert-butyl-6-(.alpha.-methylbenzyl)phenol]	C37 H44 O2	520.336	8.931	3.40029e+06	13578.6	4781.44	12083.3	6430.8	2.69313e+06	16063.2	2576.76	5999.08	3968.49	10087.4	12370.6	10144.2	10081.9	10761	9002.85	6987.68
M_0274	2-Ethoxy-4-hydrazino-6-(1-piperidinyl)-1,3,5-triazine	C10 H18 N6 O	238.155	8.559	6340.14	265855	162687	20747.3	230612	18037.1	202925	20077.9	1.97376e+06	25769.5	23874.4	2.5264e+06	8618.14	1.11373e+06	46655	46078.8	1.13264e+06
M_0275	trans,trans-2,4-Heptadienal	C7 H10 O	110.074	7.772	70610.4	973799	267123	120738	1.45319e+06	1.49119e+06	3.33265e+06	2.78579e+06	429492	1.2724e+06	1.70885e+06	1.47113e+06	359215	40171.6	838801	836036	906011
M_0276	Adenosine	C10 H13 N5 O4	267.097	1.433	12733.8	15145.8	16734	8574.59	376834	354514	279277	276794	221648	309142	216676	203496	270763	11939.4	105690	45923.1	627412
M_0277	Choline	C5 H13 N O	103.1	10.08	1.30199e+06	537765	944004	545935	1.27995e+06	846878	683965	814438	511042	3.28072e+06	697578	638831	222794	134218	768788	2.07386e+06	219493
M_0278	4033747	C26 H52 N O7 P	521.348	10.006	1.62366e+06	264135	1.41609e+06	3.23026e+06	292281	824482	984359	846334	192324	188530	275664	295381	203706	42548.2	51251.6	204011	703948
M_0279	Ethyldimethylbenzene	C10 H14	134.11	8.667	2.66119e+06	2.55793e+06	2.59172e+06	2.1276e+06	2.10066e+06	2.18096e+06	1.85599e+06	1.94966e+06	2.38759e+06	3.19331e+06	1.96184e+06	1.99332e+06	1.92583e+06	1.95718e+06	1.84939e+06	2.18271e+06	1.12987e+06
M_0280	alpha-Ketoglutaric acid	C5 H6 O5	146.022	2.157	32110.4	989460	39002.5	790226	33341.9	39967.4	866903	672439	24714.3	221440	113215	130654	27235.9	3.19218e+06	194772	470128	2.04741e+06
M_0281	N-[(2S,3S)-5-[(2S)-1-hydroxypropan-2-yl]-3-methyl-2-(methylaminomethyl)-6-oxo-2,3,4,7-tetrahydro-1,5-benzoxazonin-9-yl]cyclopropanecarboxamide	C21 H31 N3 O4	389.231	8.981	3.0617e+06	2.77452e+06	2.51199e+06	216288	3.00185e+06	1.03171e+06	1.74129e+06	2.63626e+06	3.1841e+06	2.3684e+06	2.70878e+06	2.56584e+06	2.1202e+06	289048	88260.8	38311.8	39241.1
M_0282	DL-Carnitine	C7 H15 N O3	161.105	1.47	1.37791e+06	1.61986e+06	1.72139e+06	1.41742e+06	1.80304e+06	2.04628e+06	1.08137e+06	1.23345e+06	1.94547e+06	1.8393e+06	677227	1.87015e+06	1.77626e+06	934076	1.42589e+06	2.92327e+06	1.68457e+06
M_0283	L-Tyrosine	C9 H11 N O3	181.074	1.365	129118	160657	645241	59077.6	108200	1.34214e+06	1.36358e+06	773103	697712	952219	1.50151e+06	1.09698e+06	1.80317e+06	2.0802e+06	515105	158376	1.42472e+06
M_0284	2H-Pyran-2,4,6(3H,5H)-trione	C5 H4 O4	128.011	2.277	878262	1.88084e+06	514153	1.23986e+06	636425	1.43776e+06	1.67967e+06	958978	378564	37163	1.14139e+06	1.07339e+06	1.0667e+06	74666.8	1.97466e+06	1.09955e+06	48828.4
M_0285	5-Hydroxyindole-3-acetic acid	C10 H9 N O3	191.058	2.211	96024.9	190277	155645	163872	238075	189353	186640	131847	233294	216576	212421	154369	166841	1.4313e+06	624829	3.08164e+06	998298
M_0286	1H-purine-2,6-dione, 3,7-dihydro-7-[2-hydroxy-3-[(2E)-2-piperidinylideneamino]propyl]-1,3-dimethyl-	C15 H22 N6 O3	334.176	8.505	2.28988e+06	2.29339e+06	2.58311e+06	1.23148e+06	2.67592e+06	2.51917e+06	2.18491e+06	2.51982e+06	1.63534e+06	2.24673e+06	2.99998e+06	2.62184e+06	2.75144e+06	1.14322e+06	3.07252e+06	1.5967e+06	1.35954e+06
M_0287	Edaravone	C10 H10 N2 O	174.079	6.107	3514.44	3406.32	3604.49	3514.98	3576.37	3493.36	3443.62	3373.44	3507.85	3051.51	3478.99	4155.38	3429.64	3611.08	3408.97	4307.77	3468.39
M_0288	1-[N-Cyano-N-(4,6-dimethyl-2-pyrimidinyl)glycyl]-4-piperidinecarboxamide	C15 H20 N6 O2	316.165	8.516	2.16882e+06	2.06657e+06	2.62368e+06	1.23337e+06	2.43599e+06	2.27169e+06	1.82125e+06	2.32478e+06	1.54959e+06	1.96877e+06	2.73534e+06	2.40202e+06	2.74662e+06	1.02963e+06	3.04813e+06	1.46038e+06	1.20771e+06
M_0289	1760709	C10 H24 N2 O3	220.179	1.145	1.07534e+06	1.27326e+06	1.60924e+06	1.40982e+06	1.41289e+06	1.68389e+06	1.20567e+06	1.39402e+06	1.24318e+06	1.2248e+06	955935	1.86833e+06	1.44466e+06	652493	2.06484e+06	1.80502e+06	2.342e+06
M_0290	5-Hydroxyindole-3-acetic acid	C10 H9 N O3	191.058	5.013	25933.9	52766.3	46441.4	8422.75	74101.5	125636	104184	79226.6	64552.9	106393	127896	95950.9	93084	819157	234087	252329	408504
M_0291	(2-Amino-3-hydroxybutanoyl)oxonium	C4 H10 N O3	120.065	1.287	215622	88010.3	162421	150822	266553	526909	146210	42615	495167	187411	239636	288075	161015	3.03226e+06	859013	312597	503270
M_0292	Creatine	C4 H9 N3 O2	131.07	1.324	981093	2.68103e+06	2.38934e+06	3.02829e+06	772485	903944	1.05999e+06	1.34287e+06	687717	721081	920601	522897	657805	1.47432e+06	667083	396448	440056
M_0293	Creatine	C4 H9 N3 O2	131.07	1.259	1.17143e+06	2.85633e+06	2.49881e+06	2.93913e+06	927082	1.06784e+06	1.37e+06	1.17366e+06	435566	377365	495437	1.02079e+06	635978	3.01202e+06	776114	2.50995e+06	1.13644e+06
M_0294	N6,N6,N6-Trimethyl-L-lysine	C9 H20 N2 O2	188.153	1.071	1.11841e+06	679728	2.90832e+06	734829	261872	182499	229061	618984	486158	216159	234041	205253	234713	356159	163688	100854	148480
M_0295	L-Ergothioneine	C9 H15 N3 O2 S	229.088	1.213	2.43596e+06	1.54393e+06	2.88921e+06	53902.6	590366	1.9572e+06	858376	755613	561861	511784	645889	643397	576300	61917.9	253961	134944	282284
M_0296	Histamine	C5 H9 N3	94.0535	0.796	2.11136e+06	2.86704e+06	1.05572e+06	1.71247e+06	2.82355e+06	1.65366e+06	2.46226e+06	2.72178e+06	1.42781e+06	1.37808e+06	2.428e+06	1.69755e+06	2.48176e+06	830265	2.33606e+06	879033	2.56402e+06
M_0297	L-Kynurenine	C10 H12 N2 O3	208.085	2.207	90037.1	168813	139685	150553	216648	173421	170200	118991	215892	194278	199969	141925	155551	1.32674e+06	577523	2.85757e+06	927410
M_0298	Dimethylphosphoramidocyanidic acid	C3 H7 N2 O2 P	134.025	0.896	7120.61	2.8544e+06	32739.6	12830.3	10127.3	10545.4	14291.6	12415.8	7694.66	15887.1	11668.5	9216.23	9506.24	45610.8	29147.8	18874.7	18834.4
M_0299	LysoPC(20:5(5Z,8Z,11Z,14Z,17Z))	C28 H48 N O7 P	541.315	10.653	150975	173663	169267	141239	984402	166513	198071	156280	141246	358668	122128	161571	4368.87	1450.68	120646	179604	186944
M_0300	2-Methoxyestradiol	C19 H26 O3	302.186	8.778	467847	454012	331640	244388	442605	596501	627133	669217	492306	351059	374733	434493	384157	1.34707e+06	2.4794e+06	1.00835e+06	896704
M_0301	3,7-Dinitro-1,3,5,7-tetraazabicyclo[3.3.1]nonane	C5 H10 N6 O4	218.075	0.962	510235	847420	1.41494e+06	1.19693e+06	1.3679e+06	2.81028e+06	980275	1.38237e+06	1.85417e+06	2.26467e+06	1.60789e+06	2.28649e+06	1.56992e+06	1.06644e+06	1.68966e+06	449081	1.64945e+06
M_0302	4-Morpholinylacetic acid	C6 H11 N O3	145.074	3.036	1.41219e+06	937588	1.20289e+06	616776	471989	1.20028e+06	1.72021e+06	412184	281441	1.09232e+06	1.8391e+06	1.16198e+06	2.59646e+06	2.79642e+06	1.10914e+06	457919	1.28595e+06
M_0303	2,3-Dimethyl-benzothiazol-3-ium	C9 H10 N S	164.054	0.792	2.79638e+06	1.84215e+06	1.92353e+06	1.88287e+06	630414	1.39101e+06	754349	549539	394917	611660	602979	597702	493846	2.19328e+06	1.21485e+06	941194	2.11756e+06
M_0304	2-(14,15-Epoxyeicosatrienoyl) glycerol	C23 H38 O5	372.288	9.049	2.4347e+06	2.79415e+06	1.62703e+06	2.11452e+06	1.04004e+06	901086	1.20656e+06	1.50157e+06	1.88192e+06	1.16507e+06	1.07832e+06	1.38095e+06	931729	1.18091e+06	1.39839e+06	1.22236e+06	1.66081e+06
M_0305	tin(ii) hydride	H2 Sn	121.917	1.054	2.79235e+06	1.78493e+06	1.52397e+06	801105	395900	274986	269662	361355	838760	327756	294479	437839	285046	238713	704356	141633	330104
M_0306	tin(ii) hydride	H2 Sn	121.918	0.991	2.78296e+06	1.35259e+06	1.37904e+06	693806	64231.2	290974	174147	552496	442563	274028	273019	158420	265808	35650.3	60826.3	157374	36297.6
M_0307	Glycidyl Stearate	C21 H40 O3	340.298	10.466	2.58629e+06	2.3116e+06	2.67256e+06	2.28376e+06	2.03152e+06	1.3895e+06	1.48266e+06	873943	2.75783e+06	1.96397e+06	1.74311e+06	1.62582e+06	1.60885e+06	1.70505e+06	575946	1.82037e+06	1.21207e+06
M_0308	Glycidyl Stearate	C21 H40 O3	340.298	10.522	2.58629e+06	2.3116e+06	131571	2.28376e+06	754948	1.3895e+06	494493	1.55936e+06	2.75783e+06	1.96397e+06	1.74311e+06	334979	880761	112547	82802.8	41293.1	65475.9
M_0309	MFCD22416941	C25 H47 N O4	425.351	8.357	787084	1.02402e+06	628929	807026	841676	520396	967001	509622	753798	1.35476e+06	1.48256e+06	1.13329e+06	1.13625e+06	2.73677e+06	273184	189945	1.03006e+06
M_0310	Glufosinate	C5 H12 N O4 P	181.051	1.22	2.73391e+06	1.32703e+06	1.69185e+06	634991	537073	812172	838227	538935	405459	917683	412012	818966	659982	42338.8	1.00058e+06	239216	825863
M_0311	1-(3-Aminopropyl)-2-hydroxy-3-oxo-1-propyltriazane	C6 H16 N4 O2	176.127	1.373	5955.64	5139.02	5420.7	4899.15	4639.46	4846.84	4927.35	6581.44	3953.02	4474.72	4242.8	5075.04	5306.23	8670.32	5479.77	2.70178e+06	4633.88
M_0312	2,1,3-Benzoxadiazol-5-yl(4-phenylpiperazino)methanone	C17 H16 N4 O2	308.123	7.907	403009	30620.4	697134	530596	66788.3	126231	100546	33621.8	573613	111929	412997	82829.9	139348	203925	179446	72006.4	152376
M_0313	4-Hydroxybenzotriazole	C6 H5 N3 O	135.041	1.091	939379	647319	1.55659e+06	1.83052e+06	1.18405e+06	1.63791e+06	1.91478e+06	687938	1.13922e+06	905985	548038	1.67384e+06	1.12968e+06	2691113	1.08944e+06	1.2002e+06	1.37079e+06
M_0314	2127	C7 H6 O	106.042	9.109	8400.06	2.68533e+06	7693.65	26514.9	7001.99	6923.25	7599.53	7416.86	1208.65	7330.3	6786.39	7422.52	6279.06	10120.2	1106.71	8080.81	11332.6
M_0315	1-[N-Cyano-N-(4,6-dimethyl-2-pyrimidinyl)glycyl]-4-piperidinecarboxamide	C15 H20 N6 O2	316.165	8.413	2.11348e+06	226309	300788	1309.47	2.38997e+06	1636.82	106635	290815	1.52888e+06	344870	2.68264e+06	2.36379e+06	773881	1.01721e+06	487322	4943.39	920117
M_0316	Hydroxycitronellal diethyl acetal	C14 H30 O3	246.219	9.102	2.68038e+06	2.27619e+06	1.73954e+06	1.68836e+06	1.25472e+06	732467	1.29702e+06	911744	2.26951e+06	2.12102e+06	1.42254e+06	1.23442e+06	1.03889e+06	1.18936e+06	1.29005e+06	769641	819939
M_0317	Cumene	C9 H12	120.094	8.663	2.14429e+06	2.02089e+06	2.34031e+06	1.84754e+06	1.55848e+06	1.92358e+06	1.74127e+06	1.91988e+06	2.27169e+06	2.66107e+06	1.93905e+06	1.66176e+06	1.73667e+06	1.72039e+06	1.52478e+06	1.84089e+06	985013
M_0318	2,6-Dimethyl-γ-pyrone	C7 H8 O2	124.053	7.783	138728	205461	157903	953122	1.51616e+06	2.13145e+06	2.6591e+06	920445	802789	1.6499e+06	1.7233e+06	2.42237e+06	335668	72008	526762	332772	868930
M_0319	Adenosine 5'-monophosphate	C10 H14 N5 O7 P	369.045	1.223	1.79997e+06	1.28119e+06	1.83776e+06	1.65642e+06	1.17214e+06	1.01079e+06	984761	616121	587987	970830	917648	1.43696e+06	1.18976e+06	40375.7	739085	38684.7	1.59626e+06
M_0320	Dichloromethane	C H2 Cl2	83.953	0.636	566788	797720	663409	91365.5	2.65241e+06	218784	1.3579e+06	596425	412362	340180	1.43098e+06	1.04643e+06	1.11774e+06	1.05249e+06	1.09983e+06	407946	605825
M_0321	1-Boc-3-pyrrolidinol	C9 H17 N O3	187.121	6.905	300645	259805	256953	368824	2.12252e+06	1.40945e+06	2.63864e+06	346345	480159	740863	672885	334514	329069	353597	245008	508585	530716
M_0322	DL-Glutamine	C5 H10 N2 O3	146.069	1.392	399193	826401	418217	1.54249e+06	843043	181880	705338	351824	744660	118021	286963	511890	470623	2.63749e+06	750967	514729	226451
M_0323	Histamine	C5 H9 N3	111.08	0.799	1.93313e+06	2.61984e+06	984781	1.53643e+06	2.56241e+06	1.50092e+06	2.23855e+06	2.48057e+06	1.29392e+06	1.24732e+06	2.25152e+06	1.58188e+06	2.21368e+06	774861	2.09767e+06	816911	2.34408e+06
M_0324	2,5,8,11-Tetraoxanonadecane	C15 H32 O4	276.23	8.923	214764	227343	203405	388846	184702	205402	210088	207828	198008	160182	182085	204044	183092	1.27716e+06	220554	933820	2.61888e+06
M_0325	2707	C8 H14 O	126.105	7.747	245247	733748	1.04045e+06	190296	1.76499e+06	1.50493e+06	1.68534e+06	2.61676e+06	1.75379e+06	1.49362e+06	2.08168e+06	2.0836e+06	792648	685031	35923.9	468197	287676
M_0326	3-[4-(Dimethylamino)phenyl]-6,8-dimethylpyrimido[5,4-e][1,2,4]triazine-5,7(6H,8H)-dione	C15 H16 N6 O2	312.133	1.536	984384	1.01791e+06	1.18682e+06	4455.93	1.13331e+06	1.6631e+06	1.76721e+06	793211	502613	1.1768e+06	1.77346e+06	1.50852e+06	1.34537e+06	960175	1.12176e+06	213974	2.61666e+06
M_0327	1-[3-Hydroxy-2-(2-hydroxy-2-propanyl)-2,3-dihydro-1-benzofuran-5-yl]ethanone	C13 H16 O4	236.102	7.478	497810	667083	890387	641008	2.60086e+06	634942	529544	690215	670564	532949	655021	659503	244959	60554.9	438475	570088	35912.9
M_0328	MNA	C7 H8 N2 O2	152.059	2.193	807399	2721.66	76540.5	4345.25	53700	41223.1	62971.8	1.27265e+06	22353.7	25331.2	65267.1	5488.17	26151	2.59323e+06	1.22552e+06	1.52157e+06	1.46984e+06
M_0329	4-Indolecarbaldehyde	C9 H7 N O	145.053	7.397	237737	349306	325089	298570	219076	345148	274240	154459	174382	140295	142481	171569	60220.3	55267.3	28230.5	10433.7	44969.5
M_0330	1,1-Dimethyl-3-(2H-tetrazol-5-yl)urea	C4 H8 N6 O	156.076	3.519	1.77132e+06	2.49836e+06	1.65009e+06	1.46538e+06	1.23051e+06	1.96301e+06	1.24072e+06	1.1808e+06	1.04013e+06	1.2742e+06	958627	1.93261e+06	1.15504e+06	446861	607957	833151	909720
M_0331	1-(3-Aminopropyl)-2-hydroxy-3-oxo-1-propyltriazane	C6 H16 N4 O2	176.127	1.264	7560.94	7485.88	10060.1	7561.55	6715.7	8221.56	8016.73	6714.8	6357.49	6920.36	6906.12	7224.85	7359.09	13927.6	9070.3	2.49323e+06	9099.7
M_0332	Inosine-5'-monophosphate (IMP)	C10 H13 N4 O8 P	348.047	2.764	167428	1.65625e+06	2.46332e+06	1.24799e+06	88430.9	92335.5	80302.5	183300	92546.6	83268.4	103896	135842	144631	3037.65	17978.9	2358.39	50739.4
M_0333	1-O-Tetradecylglycerol	C17 H36 O3	288.266	9.506	2.46043e+06	1.96982e+06	1.76709e+06	1.05993e+06	1.34774e+06	930251	1.10291e+06	949135	2.19332e+06	2.06659e+06	1.71823e+06	647900	1.35505e+06	904952	1.10668e+06	785011	503378
M_0334	3,5-Diamino-N-carbamimidoyl-2-pyrazinecarboxamide	C6 H9 N7 O	195.087	6.746	354319	176190	625577	472054	398043	805814	559820	260572	93210.7	166265	182375	382194	118019	2.45106e+06	262650	529819	631191
M_0335	2729	C9 H14 O2	154.099	7.651	377632	150721	22215.1	369933	200636	143162	506974	890849	1.02903e+06	130337	196373	2.44354e+06	265134	328390	314324	3581.82	249637
M_0336	N-Methyl-6-[methyl(propylcarbamoyl)amino]-1,2,4-triazine-5-carboxamide	C10 H16 N6 O2	252.134	8.172	617065	1.37501e+06	415944	2.4302e+06	579583	453753	473322	660139	388324	423202	503158	490225	242200	245953	489915	271972	89323.7
M_0337	14(S)-HDHA	C22 H32 O3	326.224	9.08	357080	710399	276291	372435	245946	270482	420294	561159	501406	740525	200516	229493	276183	2.42794e+06	930777	350276	952448
M_0338	CAPROYL SARCOSINE	C13 H25 N O3	243.183	8.289	973789	816931	1.16166e+06	1.19636e+06	1.97511e+06	1.82188e+06	1.50369e+06	1.0158e+06	1.18261e+06	1.12381e+06	1.16268e+06	1.68614e+06	1.34672e+06	709202	826542	850193	602007
M_0339	N-[2-(1-Cyclohexen-1-yl)ethyl]-4,6-di(4-morpholinyl)-1,3,5-triazin-2-amine	C19 H30 N6 O2	374.243	9.356	2.41994e+06	462430	636014	743799	142820	132301	286566	170644	162320	155419	132397	173300	122356	239675	360129	171061	399578
M_0340	2-((3-(Dodecyloxy)propyl)(2-(2-hydroxyethoxy)ethyl)amino)ethanol	C21 H45 N O4	375.335	10.461	2.05468e+06	2.04243e+06	2.36897e+06	1.91137e+06	1.6484e+06	1.36934e+06	1.69219e+06	2.3848e+06	2.41382e+06	1.84196e+06	995432	1.59286e+06	1.44315e+06	939227	1.61294e+06	1.29498e+06	1.11317e+06
M_0341	hodgkinsine	C33 H38 N6	518.318	10.137	276732	213725	171233	432915	1.78451e+06	976047	1.09541e+06	2.41224e+06	410689	1.35895e+06	853826	483370	221037	108526	647990	107591	1.57143e+06
M_0342	DL-Glutamine	C5 H10 N2 O3	146.069	1.582	190187	252583	521131	667074	375901	215897	587836	461395	577992	771826	1.2054e+06	855629	638312	2.39799e+06	526644	621472	520801
M_0343	Amdoxovir	C9 H12 N6 O3	252.097	7.523	472945	2.39483e+06	477071	1.95252e+06	631437	1.06499e+06	320896	51024.6	1.05795e+06	669392	917083	286312	122849	88085.4	41339.2	1.59363e+06	26486.7
M_0344	Heptanoic anhydride	C14 H26 O3	242.188	8.997	156021	669462	44701.4	464544	135074	63202.9	379629	443700	480948	890072	498132	26723.9	610433	2.38621e+06	371849	45310.7	420962
M_0345	p-Decyloxybenzaldehyde	C17 H26 O2	262.193	8.777	388805	357132	290836	187306	428667	428453	536864	554122	401019	200537	302143	342755	309190	1.19285e+06	1.86456e+06	857156	1.04647e+06
M_0346	Ethyl 3-isopropyl-1H-pyrazole-5-carboxylate	C9 H14 N2 O2	182.106	2.441	13029.6	37781.7	13255.8	14893.1	10619	13227	1456.95	9201.76	799.525	32199.9	29562.2	845.346	8789.29	2.36824e+06	110414	84901.8	177207
M_0347	(2-Oxo-2,3-dihydro-4H-1,4-benzoxazin-4-yl)acetic acid	C10 H9 N O4	207.053	5.316	674576	510341	551635	178058	253272	820055	349979	157246	316801	583284	426094	390606	721928	2.34961e+06	382517	571608	487088
M_0348	1,1,1-Trifluoroacetone	C3 H3 F3 O	112.014	1.13	675998	656620	801345	935603	1.31217e+06	1.36817e+06	799094	822659	470835	1.13129e+06	1.18926e+06	728767	2.3447e+06	734697	1.90767e+06	1.76349e+06	1.92247e+06
M_0349	Phthalic anhydride	C8 H4 O3	148.016	8.959	1.15877e+06	1.41498e+06	1.35761e+06	1.77229e+06	1.56464e+06	2.34403e+06	1.21017e+06	1.64952e+06	1.5047e+06	1.14874e+06	1.40641e+06	1.887e+06	1.23271e+06	1.10079e+06	1.13452e+06	1.58463e+06	2.07606e+06
M_0350	Inosine-5'-monophosphate (IMP)	C10 H13 N4 O8 P	348.047	2.161	296768	2.33919e+06	457103	538896	83175	158391	169844	327095	78284.5	111282	138673	161816	316225	6480.79	39597.9	3957.28	50020.5
M_0351	Arachidonoyl amide	C20 H33 N O	303.254	9.96	244492	137674	49937.4	123073	1.75861e+06	2.33871e+06	1.08119e+06	188077	70258.9	565336	347612	2231.74	13414.5	118825	144055	224590	51815.7
M_0352	5-O-methyl embelin	C18 H28 O4	308.198	8.746	359818	1.29471e+06	268515	119044	1.71346e+06	2.32472e+06	1.96062e+06	2.03192e+06	1.25501e+06	1.62828e+06	1.527e+06	2.08948e+06	1.40469e+06	1.1913e+06	1.48002e+06	1.54583e+06	1.3143e+06
M_0353	Pregabalin	C8 H17 N O2	159.126	5.121	888291	1.02687e+06	918719	927592	2.05326e+06	1.66471e+06	1.30617e+06	1.28296e+06	1.2112e+06	1.27408e+06	1.4585e+06	2.05763e+06	2.32408e+06	798720	797189	758051	849667
M_0354	3H-1,2,3-triazolo[4,5-d]pyrimidine-5,7-diamine	C4 H5 N7	151.061	1.099	920736	910060	1.44283e+06	1.77555e+06	2.19207e+06	2.31803e+06	1.63705e+06	1.35248e+06	1.56598e+06	1.49728e+06	1.43921e+06	1.59197e+06	1.63578e+06	561931	856366	1.301e+06	932024
M_0355	FZ5600000	C27 H44	368.344	9.371	2567.71	11933.2	47919.1	221226	72144.8	1.82966e+06	1.46671e+06	104128	207777	214821	13972.4	193671	195623	207755	765664	7627.24	500341
M_0356	4123225	C4 H11 Li Si	94.0789	7.853	28799.6	1.5591e+06	571612	375489	1.02713e+06	698940	838222	1.49394e+06	26768.7	908363	1.61569e+06	2.3082e+06	776688	24406.7	537484	49044.5	88170.8
M_0357	Furazano[3,4-b]pyrazine, 5,6-bis(diethylamino)-	C12 H20 N6 O	264.17	8.983	121717	648209	58061.2	465153	120478	114877	377578	425019	456338	900873	438506	29442.7	555040	2.29963e+06	364167	36409.7	403381
M_0358	Acetophenone	C8 H8 O	120.058	2.451	1.17902e+06	1.15516e+06	1.64456e+06	990800	1.00588e+06	1.6238e+06	1.07189e+06	974812	792580	1.03958e+06	762995	1.31173e+06	945080	2.29758e+06	1.32291e+06	2.23333e+06	1.39565e+06
M_0359	Nicotinamide	C6 H6 N2 O	122.048	1.329	1.30949e+06	596332	2.2944e+06	1.26821e+06	24972.3	16646.4	23613.4	43245.5	106402	14867.2	27804.8	34446.2	11788.7	11169	109600	14040.2	8746.15
M_0360	N-Methyl-N-(1,2,2,6,6-pentamethyl-piperidin-4-yl)-4-tetrazol-1-yl-benzamide	C19 H28 N6 O	356.233	9.402	2.28238e+06	321322	550234	643847	49891.2	58396.3	72890.7	75944	232355	90908.3	42090.1	113608	54173.6	172916	301687	91289.2	307994
M_0361	Phloroglucinol	C6 H6 O3	126.03	1.967	1.13244e+06	2.27305e+06	982449	1.76531e+06	482058	984600	763862	572960	666319	1.23828e+06	1.11352e+06	586389	1.48585e+06	1.32461e+06	676324	612667	583636
M_0362	172966	C11 H9 N O3	203.058	2.479	15542.5	12988.5	16476.2	23205.6	13708.5	16440.4	14037.5	11437.3	9969.92	11346.5	10165.4	14427.6	10924.6	23511.5	13794.9	21441.9	14908.1
M_0363	1-(3-Chloro-2-fluorophenyl)-3-(dimethylamino)prop-2-en-1-one	C11 H11 Cl F N O	227.056	7.262	268584	307335	420120	194975	280448	305065	393893	208016	234016	279565	298908	231149	101416	1.56703e+06	609649	871210	1.18403e+06
M_0364	2080745	C9 H20 N2 O2	188.152	0.885	2.26616e+06	1.29482e+06	1.68712e+06	783449	304972	350076	458362	332076	419236	453126	460479	328054	410583	557942	260159	238944	237734
M_0365	Rimexolone	C24 H34 O3	370.251	8.488	428375	181526	477065	79947.5	16326.9	104947	11072.4	6938.14	39427.3	73378.6	463580	287945	43604.5	10444	9191.48	26266.5	2.26478e+06
M_0366	MFCD00216577	C9 H13 N3 Si	191.088	3.416	14989.6	18312	18419.1	14570.4	19109	20638.3	17280.1	15379.5	16297.1	16669.3	16206.5	18566.3	16731	13796	15554.6	16552.1	18603.2
M_0367	Octahydro-1,2,8-indolizinetriol	C8 H15 N O3	173.105	7.174	639891	2.25188e+06	355227	1.17948e+06	250000	258291	747772	436108	390898	1.14605e+06	1.36055e+06	224390	458301	148543	108749	19542.5	442800
M_0368	procodazole	C10 H10 N2 O2	190.074	2.414	683229	2248087	711966	481925	417048	103034	434100	1.02532e+06	1.37097e+06	472247	572763	616787	600781	5728.3	13835.1	12695.7	8827.04
M_0369	monomethyl phosphate	C H5 O4 P	111.993	1.73	2.23615e+06	1.46105e+06	905675	906697	141123	160025	126976	674861	590366	183369	414027	372589	509691	80969	47988.4	53021	44472.5
M_0370	2-[2-(2,6-Dimethylmorpholino)-2-oxoethoxy]phenyl N,N-dimethylcarbamate	C17 H24 N2 O5	336.17	8.972	45263.1	38237.4	22974.6	24094	37104.8	13107.5	8177.13	33718.2	30799.5	15871.3	24054.5	28226.2	9529.46	1.22127e+06	940715	887433	2.21345e+06
M_0371	Linoleamide	C18 H33 N O	279.256	9.628	174675	122830	23354.8	39084.1	694789	2.20019e+06	486875	131929	47666.2	445624	186169	34381.9	36777.9	28393.1	98212.9	134746	65074.2
M_0372	Diethyl N-palmitoylglutamate	C25 H47 N O5	441.345	8.251	648224	856140	586527	622099	430381	407402	761288	496862	679771	939646	892182	631324	651417	2.19906e+06	331679	255463	815054
M_0373	Docosahexaenoic acid	C22 H32 O2	328.24	10.018	861594	1.5738e+06	637200	488607	1.59328e+06	992734	875352	1.61126e+06	1.776e+06	2.19672e+06	1.20503e+06	676183	914764	1.61081e+06	655628	607566	567934
M_0374	2,6-Ditert-butylhexahydro-1H,5H-2,3a,4a,6,7a,8a-hexaazacyclopenta[def]fluorene-4,8-dione	C16 H28 N6 O2	336.228	9.009	612483	1.23709e+06	554950	2.19619e+06	523715	597636	896124	891381	1.34198e+06	1.19027e+06	604641	493691	725980	1.6654e+06	1.64503e+06	262072	1.13192e+06
M_0375	Cafaminol	C11 H17 N5 O3	267.133	1.594	519691	799417	795362	789498	1.09197e+06	1.43976e+06	1.65144e+06	1.72453e+06	798537	1.99559e+06	2.05867e+06	1.67376e+06	1.44543e+06	2.19578e+06	733027	39424.5	379693
M_0376	Glycidyl Stearate	C21 H40 O3	340.298	10.414	210274	392861	274643	169225	2.03152e+06	113865	535627	873943	361311	149192	203703	712502	1.76528e+06	102042	575946	629190	1.21207e+06
M_0377	Thromoboxane B1	C20 H36 O6	788.451	8.427	2.11103e+06	1.89695e+06	1.29288e+06	1.30897e+06	1.32279e+06	1.83105e+06	2.09531e+06	1.8232e+06	2.19444e+06	2.09448e+06	1.90614e+06	1.43991e+06	1.25506e+06	888990	1.3237e+06	795521	1.43012e+06
M_0378	3-[1,3,3-Tris(allyloxy)propoxy]-1-propene	C15 H24 O4	268.167	8.565	879533	1.13981e+06	1.04742e+06	2.18938e+06	751114	464380	599976	1.08853e+06	854664	1.14506e+06	1.1049e+06	1.02955e+06	805085	752791	240926	498695	558863
M_0379	Bis(4-ethylbenzylidene)sorbitol	C24 H30 O6	414.204	8.675	1.0962e+06	933925	1.13783e+06	832166	974990	734364	737604	2.1828e+06	648605	1.00867e+06	584635	1.06545e+06	959707	1.25236e+06	915175	959377	1.13459e+06
M_0380	5-Nitro-2-thiophenecarboxylic acid	C5 H3 N O4 S	172.978	7.504	143986	91777.1	285763	45174.9	188632	89752.5	988447	705586	313416	483502	822968	1.09439e+06	240849	98448.4	62729.5	271284	28133.7
M_0381	Cafestol	C20 H28 O3	316.201	9.055	504873	634459	470270	2.14801e+06	203391	151796	268820	264918	668326	713759	361556	198843	276082	352193	330918	183753	262232
M_0382	1-Adamantanol	C10 H16 O	152.12	8.729	1.64901e+06	1.65765e+06	54315.7	35661.2	36501.8	39134.8	144792	12853.4	1.64192e+06	2.14128e+06	29512.9	1.32341e+06	46238.1	69377.5	360528	8183.5	25370.3
M_0383	Acetyl-L-carnitine	C9 H17 N O4	203.116	1.558	567715	1.60273e+06	1.80693e+06	1.70934e+06	216215	1.2186e+06	749158	739162	977338	1.53773e+06	748298	977510	889616	2.13297e+06	625008	662140	1.25445e+06
M_0384	(1Z,5Z)-1,5-Cyclooctadiene	C8 H12	108.094	8.658	786252	2.12329e+06	951145	630043	784269	961738	721108	689902	761516	1.22589e+06	755060	791445	567547	850611	406367	524686	317364
M_0385	Methyl 8-(8-hexyl-2-methyl-1,3-dioxo-2,3,5,8-tetrahydro-1H-[1,2,4]triazolo[1,2-a]pyridazin-5-yl)octanoate	C22 H37 N3 O4	407.278	8.422	1.43627e+06	1.89557e+06	1.61142e+06	1.49844e+06	1.11956e+06	2.07441e+06	1.86519e+06	1.80609e+06	1.77951e+06	1.95707e+06	1.56321e+06	2.12019e+06	1.0432e+06	1.17421e+06	930370	936937	1.13136e+06
M_0386	mephenesin	C10 H14 O3	182.094	7.763	291364	1.18435e+06	292050	472656	1.30197e+06	579147	1.42222e+06	524388	663866	1.47298e+06	922689	2.1159e+06	1.22089e+06	129203	93090.1	9457.44	35231
M_0387	1-Linoleoyl glycerol	C21 H38 O4	354.277	9.644	59843.9	675718	124798	45641.3	1.01691e+06	791605	991351	1.03077e+06	481468	689036	874924	571248	539572	146654	938758	780317	607289
M_0388	halimedin	C10 H16 N6 O	236.139	8.376	25916.4	180574	119919	69610.1	2.0921e+06	21994.7	114000	180565	64853.8	119787	76639.2	60624.6	42690.3	850228	35705.7	64198.8	54120.8
M_0389	Ethyl N-(thioxomethylene)valinate	C8 H13 N O2 S	187.067	5.581	773513	1.10676e+06	786164	744810	1.19643e+06	1.42286e+06	771284	1.58338e+06	1.19344e+06	760595	500040	529502	990325	1.90571e+06	315293	67047.3	2.08855e+06
M_0390	Linoleyl carnitine	C25 H45 N O4	423.335	8.254	616040	813806	555986	573936	382352	367986	683197	465210	630029	839169	823674	564119	606028	2.08049e+06	318189	252898	780011
M_0391	L-Tyrosine	C9 H11 N O3	181.074	1.312	187232	25409.3	619079	59077.6	102559	1.34214e+06	1.36358e+06	245218	771701	952219	1.50151e+06	177918	1.80317e+06	2.0802e+06	1.41038e+06	85744.2	1.42472e+06
M_0392	2,4-Diamino-6-pteridinecarbaldehyde	C7 H6 N6 O	190.061	7.032	225228	229925	215393	197039	305042	136088	37646.2	267373	53435.1	208570	83030.9	259554	667595	179974	115101	1.31421e+06	2.06971e+06
M_0393	butyl acrylate	C7 H12 O2	128.084	8.008	472382	555563	1.03028e+06	1.0297e+06	270964	32169.4	755261	1.67908e+06	256158	2.06413e+06	1.32639e+06	879612	232144	83157.2	101606	117804	86281.1
M_0394	D-PANTOTHENIC ACID	C9 H17 N O5	219.111	3.204	6308.35	371811	4198.97	3726.63	114915	474534	118001	936.443	11517	3354.98	18782.3	20374.7	40535	2.06211e+06	49067.8	269032	59322.2
M_0395	1-arachidonoyl-sn-glycero-3-phosphocholine	C28 H50 N O7 P	543.334	9.916	34553.3	158305	120214	83876.9	200122	206056	205233	168231	180688	160579	103394	158166	203100	27729	83894.4	2.06142e+06	48898.2
M_0396	Propionylcarnitine	C10 H19 N O4	217.131	1.196	1.08912e+06	1.02514e+06	2.03981e+06	973108	770516	1.46836e+06	1.2068e+06	433816	416410	612589	1.25846e+06	1.13977e+06	1.14131e+06	1.23235e+06	1.19876e+06	991034	1.64738e+06
M_0397	(+/-)12-HpETE	C20 H32 O4	318.217	9.005	468753	1.17427e+06	494185	2.03807e+06	451955	526067	721062	835890	1.24893e+06	1.13043e+06	553145	449602	618836	1.55833e+06	1.55373e+06	196427	1.08347e+06
M_0398	Cuminaldehyde	C10 H12 O	148.089	8.534	1.56129e+06	1.39457e+06	1.17384e+06	748202	537416	884569	708171	785541	1.20077e+06	877970	739759	816590	456783	390112	823154	700386	649551
M_0399	3-{[(2-Aminoethoxy)(hydroxy)phosphoryl]oxy}-2-hydroxypropyl palmitate	C21 H44 N O7 P	453.286	9.48	1.21916e+06	970957	820004	717963	1.54933e+06	1.15817e+06	1.37024e+06	1.28191e+06	1.19213e+06	1.21013e+06	1.23792e+06	1.15073e+06	686180	362388	1.26102e+06	1.62701e+06	1.64463e+06
M_0400	1-Methyl-1H-purin-1-ium	C6 H7 N4	135.066	4.426	36416.4	24848.2	36669.1	20761.6	68695.2	662216	65188.3	1.99788e+06	1.69915e+06	431231	654794	534742	416109	20627.8	10439.3	27218.1	39681.2
M_0401	Gramine	C11 H14 N2	129.058	6.04	3423.82	2368.57	3447.27	3423.87	2818.88	3256.63	3408.67	2665.02	2393.98	2186.27	2409.91	2411.13	6576.62	2984.82	3673.83	2347.35	2895.37
M_0402	Creatinine	C4 H7 N3 O	113.059	1.155	55052.2	100085	85144.5	42713.2	12370.9	61464.1	104142	61740.5	52888.8	49133.3	65902.5	63508.4	33664.6	1.98612e+06	423028	453301	763572
M_0403	1,1-Dimethyl-3-(2H-tetrazol-5-yl)urea	C4 H8 N6 O	156.076	3.593	1.77132e+06	1.16074e+06	1.65009e+06	338675	1.23051e+06	1.96301e+06	1.24072e+06	1.1808e+06	865730	1.2742e+06	958627	1.93261e+06	1.15504e+06	446861	607957	293852	909720
M_0404	1-carboxy-3-hydroxyadamantane	C11 H16 O3	196.11	7.785	387250	72057.5	97928.5	284383	321730	470727	932869	309992	319304	1.97362e+06	684867	1.87354e+06	396328	281100	40787.1	36154.8	22021.5
M_0405	gamma-Aminobutyric acid	C4 H9 N O2	103.064	1.32	240386	255971	302472	221665	249234	223450	252242	229719	351501	194234	330036	201990	270027	1.96652e+06	246195	238980	442106
M_0406	Sebacic acid	C10 H18 O4	202.121	7.954	966655	968362	654595	1.96178e+06	284236	356850	237688	364478	425170	60577.5	899384	294305	466323	881298	170088	362675	227496
M_0407	Dibenzothiophene	C12 H8 S	184.035	1.249	86101.7	236571	980441	1.28904e+06	425034	291083	476335	56596.3	97235.5	140042	1.28746e+06	92666	1.0994e+06	167346	878506	1.07221e+06	478381
M_0408	Phosphoramidocyanidic acid	C H3 N2 O2 P	105.994	0.792	1.90872e+06	1.19807e+06	1.49874e+06	1.88697e+06	457675	973410	524891	376551	195974	414533	401523	386397	331228	1.60908e+06	880001	682621	1.44306e+06
M_0409	Leucylproline	C11 H20 N2 O3	187.121	1.234	162295	711649	331114	624895	123465	203901	226900	263707	177074	94145.4	140304	130210	177379	1.90462e+06	183740	855049	265057
M_0410	6-(1-Piperidinyl)[1,2,5]oxadiazolo[3,4-b]pyrazin-5-amine	C9 H12 N6 O	220.107	8.007	302927	27276.3	335574	499017	67106	63744.9	189697	241936	211697	455978	204834	204571	124153	140539	11222.6	27917.1	221443
M_0411	N-Methyl-6-[methyl(propylcarbamoyl)amino]-1,2,4-triazine-5-carboxamide	C10 H16 N6 O2	252.134	8.025	142891	222710	319709	200028	50991.7	40483.2	472051	501403	298433	356641	383009	378820	181033	190303	39078.4	127055	91683.6
M_0412	Methyl alpha-aspartylphenylalaninate	C14 H18 N2 O5	294.122	4.885	704963	741464	852883	616384	570160	976103	857152	508708	277847	446377	450642	778759	502681	930311	923953	1.87803e+06	1.28409e+06
M_0413	DL-Ornithine	C5 H12 N2 O2	132.09	0.816	383049	577733	639110	348370	376296	531613	396643	426555	384269	255278	364766	513637	340461	1.87658e+06	580103	1.00634e+06	465800
M_0414	D-(+)-Pyroglutamic Acid	C5 H7 N O3	129.043	1.617	344977	1.36471e+06	257417	559652	640410	626038	891064	494207	590159	689878	1.87588e+06	704613	788727	1.28645e+06	1.29894e+06	705068	1.07566e+06
M_0415	Benzoxazole	C7 H5 N O	119.037	6.211	113763	2468.56	121430	99454.6	60951.8	89963.6	94835.1	53592.3	52762.2	45346.3	83462.8	98144.5	20726	97035.4	38631.3	88389.5	93898.9
M_0416	LysoPC(18:3(9Z,12Z,15Z))	C26 H48 N O7 P	517.315	9.383	181007	571879	409616	360630	494871	151223	105310	128680	288080	173842	202798	1.47533e+06	159192	1.83742e+06	204144	213173	129770
M_0417	Tris(((2-aminoethyl)amino)methyl)phenol	C15 H30 N6 O	310.248	9.428	1.86682e+06	1.51567e+06	1.51321e+06	882396	1.06179e+06	754433	819381	814994	1.83827e+06	154515	118758	512097	1.04686e+06	678703	848797	581816	390200
M_0418	5-Hydroxy-DL-tryptophan	C11 H12 N2 O3	220.085	2.519	357.934	325.749	378.95	1238.96	350.582	432.433	367.683	297.006	291.132	323.737	267.12	577.902	328.995	584.713	1387.72	454.997	961.229
M_0419	Tris(((2-aminoethyl)amino)methyl)phenol	C15 H30 N6 O	310.248	9.514	1.85166e+06	1.51567e+06	1.51321e+06	882396	1.06179e+06	754433	819381	814994	1.83827e+06	1.63598e+06	1.27844e+06	512097	1.04686e+06	678703	848797	581816	390200
M_0420	Leucylproline	C11 H20 N2 O3	228.147	1.234	331879	759095	424716	648430	223373	288603	384261	460338	305235	228238	280523	174872	285301	1.84719e+06	304625	911236	571204
M_0421	Leu-Val	C11 H22 N2 O3	230.163	2.61	1.84618e+06	372757	500903	1.08313e+06	3910.92	4640.19	6841.79	4276.47	4722.1	4029.3	3856.05	4115.98	4603.35	6302.24	4347.62	4594.48	4917.91
M_0422	Triacetylsphingosine	C24 H43 N O5	425.314	8.815	440411	204361	413636	64954	33173.5	230704	3685.09	21378	159363	60746	244727	235570	72235.3	78980.3	137029	754914	1.8407e+06
M_0423	4329	C9 H12 O	136.089	7.834	161314	59461.5	756887	518109	814782	780709	907325	1.10754e+06	1.04167e+06	1.0082e+06	1.39905e+06	1.82969e+06	440001	167096	71453.2	78795.7	35509.9
M_0424	A-134U	C8 H12 N6 O2	224.102	7.983	917084	902344	968150	1.82819e+06	275513	345948	339190	370048	442037	25425.4	1.05568e+06	435651	435137	830337	143169	337540	230765
M_0425	Creatine	C4 H9 N3 O2	131.07	1.966	501288	1.82714e+06	859239	701062	346953	830412	174465	459010	124900	153868	818848	696922	128674	820231	664704	310433	1.11155e+06
M_0426	Choline	C5 H13 N O	103.1	9.803	1.82589e+06	879503	544726	604855	342468	404654	263830	435538	1.06014e+06	354620	883957	343427	253927	138105	304042	316776	202588
M_0427	(E)-di-tert-butyl diazene-1,2-dicarboxylate	C10 H18 N2 O4	230.127	3.166	33113.6	33343.5	35883.3	53580.6	102997	111500	107176	83865.3	70173.5	80216.3	93453.7	86981.2	110780	1.82004e+06	295391	306439	445615
M_0428	5-Hydroxydecanoic acid	C10 H20 O3	188.141	8.184	170474	53099	94987.1	1.80992e+06	15623.5	16375.5	18422	2745.49	73555.9	38686.2	32951.9	41792.9	15806.7	5740.72	3939.36	3160.11	4652.8
M_0429	4,6-Bis(ethylamino)-1,3,5-triazine-2-carboxamide	C8 H14 N6 O	210.123	8.197	164616	50803.9	92257.3	1.80856e+06	12158.8	3979.19	15745.6	5454.51	71441.2	36889.3	28751.9	40528.3	14904.8	1842.92	1561.81	1574.7	1399.63
M_0430	Cuminaldehyde	C10 H12 O	148.089	8.687	970209	1.79115e+06	993400	878908	639382	778747	969642	1.413e+06	756475	724848	741827	1.12569e+06	991184	1.50692e+06	974986	887203	1.31524e+06
M_0431	Leucylproline	C11 H20 N2 O3	228.147	1.616	596957	1.38384e+06	613131	741576	255727	675630	659240	871030	450139	412428	654969	401247	625042	1.80679e+06	657931	757666	817819
M_0432	Indole	C8 H7 N	117.058	7.867	4403.89	4082.1	10559.4	4454.74	3548.01	3746.81	3694.47	3481.61	3596.4	3958.67	3591.49	3798.84	2792.02	3249.64	2949.07	2777.25	3121.35
M_0433	Elaidolinolenic acid	C18 H30 O2	278.224	9.005	296820	701139	285065	1.79175e+06	276220	438442	512118	601751	960434	748093	361592	291065	396353	1.0096e+06	920826	202695	675470
M_0434	1-Hexadecanoylpyrrolidine	C20 H39 N O	309.303	10.532	324021	261684	61082.8	110889	257900	1.78667e+06	51405.3	243796	83881.5	465724	332844	46856.2	57876.8	71423.3	98271	164134	129786
M_0435	Leucylproline	C11 H20 N2 O3	228.147	1.211	156326	143591	324738	96345.2	117502	197312	220193	258627	172191	88711.2	134832	124075	172138	1.78659e+06	176556	144242	258297
M_0436	DEMP	C5 H13 O3 P	152.06	6.145	907.129	831.47	821.515	840.499	831.015	828.332	863.807	847.954	841.082	753.135	842.193	874.055	863.246	844.814	810.617	902.66	888.702
M_0437	all-trans-retinal	C20 H28 O	284.214	9.1	1.78063e+06	1.68755e+06	1.30258e+06	1.22222e+06	1.06357e+06	151250	1.14379e+06	974268	1.69725e+06	194835	137908	893851	145125	1.3703e+06	696058	402917	724569
M_0438	(1Z,5Z)-1,5-Cyclooctadiene	C8 H12	108.094	8.284	334396	350526	781155	256226	837773	814355	1.76977e+06	1.77124e+06	1.4449e+06	566072	325067	575437	453889	372121	207358	858202	182107
M_0439	(1Z,5Z)-1,5-Cyclooctadiene	C8 H12	108.094	8.36	26112.9	58737.8	29429.2	22756.9	837773	814355	15887.6	1.77124e+06	1.4449e+06	566072	25160.9	575437	322891	372121	235436	242443	253271
M_0440	DL-Tryptophan	C11 H12 N2 O2	226.072	3.492	795270	1.45455e+06	1.60953e+06	1.02716e+06	1.48423e+06	1.54426e+06	867582	1.34976e+06	1.26786e+06	1.01801e+06	1.19079e+06	1.5122e+06	1.36429e+06	877998	1.28409e+06	1.45168e+06	1.39529e+06
M_0441	DL-Arginine	C6 H14 N4 O2	174.112	1.263	72942.6	1.12597e+06	1.04491e+06	1.75651e+06	124043	417096	175382	134188	165968	168686	160646	191202	141371	451980	209620	234382	50905.7
M_0442	.alpha.-Aminoadipic acid	C6 H11 N O4	161.069	1.125	811104	992889	1.24176e+06	1.27125e+06	832316	992549	1.2092e+06	1.12945e+06	894893	847228	1.04931e+06	926252	1.10726e+06	1.74279e+06	634383	422866	427937
M_0443	4253	C12 H22 O2	198.162	9.224	1.03237e+06	1.18443e+06	1.02247e+06	1.20023e+06	1.13174e+06	1.72971e+06	844763	986886	1.2559e+06	1.44637e+06	931388	1.70387e+06	686260	930326	698459	1.00635e+06	1.29715e+06
M_0444	1-Adamantanemethanol	C11 H18 O	166.136	8.661	1.18852e+06	1.16983e+06	1.2338e+06	901748	997178	1.33564e+06	798947	874975	973437	1.41549e+06	1.12082e+06	1.10313e+06	963787	843285	836065	896516	1.18185e+06
M_0445	Indole	C8 H7 N	117.058	3.495	766125	1.16872e+06	1.13503e+06	687872	1.2089e+06	1.26635e+06	927044	968380	1.15202e+06	992718	883026	1.47344e+06	970441	605042	843428	919005	1.1557e+06
M_0446	3H-1,2,3-triazolo[4,5-d]pyrimidine-5,7-diamine	C4 H5 N7	151.061	1.205	131881	186217	194840	128479	288416	383095	453889	238662	243684	353104	339560	309356	447010	1.69538e+06	687353	928191	735129
M_0447	3-Hydroxy-L-proline	C5 H9 N O3	131.058	2.019	344227	341355	335390	364559	324176	465917	435919	369138	403972	443336	378902	360890	373078	1.60481e+06	946340	1.69108e+06	877556
M_0448	FZ5600000	C27 H44	368.344	9.132	8561.39	234503	187621	216988	274270	258744	114135	307078	365882	609037	127281	498988	1.68081e+06	530538	1.25512e+06	107553	271770
M_0449	2,4-Pyridinedicarbohydrazonamide	C7 H11 N7	193.108	6.904	600118	163553	1.06887e+06	114090	692821	1.25065e+06	592463	815233	613756	461957	967565	309956	599914	266309	209409	713077	142616
M_0450	Nicotinamide	C6 H6 N2 O	122.048	1.227	1.15834e+06	596332	406583	1.67449e+06	23129.8	18940.9	41127.2	50052	55981.1	28920.2	41247.2	34407.8	35683.2	17606.1	15164.2	15810.2	14804.6
M_0451	Acetic propanoic anhydride	C5 H8 O3	116.048	1.416	1.03604e+06	295977	691859	1.66233e+06	420007	446310	267356	615959	735394	400201	467127	228343	282895	38134.4	280077	590606	113837
M_0452	bendiocarb	C11 H13 N O4	223.084	4.827	57739.7	51167.3	95641.5	79525.6	37430.1	80346.1	52831.5	48583.9	54484.6	11191.8	22248.9	43919.8	20083.2	1.65979e+06	64038.9	102997	155207
M_0453	DEET	C12 H17 N O	191.131	8.23	1.00611e+06	1.26679e+06	1.34647e+06	1.04786e+06	1.23604e+06	1.64944e+06	1.10976e+06	1.18307e+06	1.15286e+06	1.26114e+06	1.19028e+06	1.47948e+06	827790	809225	600018	695145	686473
M_0454	1-S-Decyl-1-thiohexitol	C16 H34 O5 S	338.214	10.547	554381	1.39176e+06	397470	341272	904628	657794	693001	910000	576950	1.64862e+06	964081	387652	844305	589666	727675	168823	342692
M_0455	Cumene	C9 H12	120.094	7.817	423419	440432	126063	18692.5	456408	664751	491514	757265	1.64366e+06	404970	588255	681232	579033	63090.9	94438.7	162682	60802.8
M_0456	4,4'-di-t-butylbiphenyl	C20 H26	266.203	9.104	1.64042e+06	1.4483e+06	1.17537e+06	1.12077e+06	908032	19885.2	906116	741093	1.54353e+06	18795.6	9706.5	742037	12406.3	742508	66206.7	24368.7	73498.7
M_0457	Triethyl orthoformate	C7 H16 O3	148.11	5.334	224116	149391	256632	40010	166003	100825	75971	50280.2	196947	141895	754876	152648	500232	68793.4	94431.8	297526	1.64024e+06
M_0458	Decyl 2-thienylacetate	C16 H26 O2 S	282.165	7.751	553533	1.12369e+06	439815	724817	1.06675e+06	247562	407480	394227	722271	784011	538393	281632	430547	969685	283579	513172	551031
M_0459	3-[(2-Aminoethyl)amino]-1-(benzylamino)-7-ethyl-5,6,7,8-tetrahydro-2,7-naphthyridine-4-carbonitrile	C20 H26 N6	350.222	10.017	702027	1.18805e+06	503506	355975	1.15439e+06	727869	556052	1.19068e+06	1.33277e+06	1.62092e+06	902438	511950	619040	1.28295e+06	451279	434262	395610
M_0460	2-Hydroxy-3-(palmitoyloxy)propyl 2-(trimethylammonio)ethyl phosphate	C24 H50 N O7 P	495.333	9.848	15822.6	167085	14667.9	332841	94775.8	61010.8	900891	153786	1.10983e+06	1.4799e+06	1.61974e+06	11590.3	43538.4	7073.4	629165	712066	32279.9
M_0461	Phthalic acid	C8 H6 O4	166.027	8.966	840529	956880	955777	1.24264e+06	1.10373e+06	1.6189e+06	805761	1.14437e+06	1.04492e+06	790175	939947	1.36398e+06	852636	756039	792568	1.11049e+06	1.43885e+06
M_0462	CU5250000	C8 H5 N O	131.037	6.627	1.61157e+06	236524	491417	1.35517e+06	25507.2	18527.6	27153.7	32593	73912.8	34285.4	68025.8	91957	65593.7	30206.6	12003.7	9029.41	15901.2
M_0463	Cimaterol	C12 H17 N3 O	219.137	6.022	2804.9	2783.65	2733.4	2566.04	2603.47	2659.34	2683.91	2621.85	2691.91	2458.35	2709.83	2679.51	2722.29	2866.49	2711.93	2710.7	2749.86
M_0464	Trigonelline	C7 H7 N O2	96.0214	1.419	360020	221302	298645	311077	161175	417077	290489	487574	247637	224070	237184	306404	272855	602587	400536	1.60647e+06	548874
M_0465	quinbolone	C24 H32 O2	352.24	8.485	306455	121784	322969	59124.3	14755.6	82473.1	9636.27	5999.31	36420.1	51015.9	343598	203086	38144.1	9092.81	7991.29	23627.5	1.6016e+06
M_0466	AU8420000	C22 H42 O8	434.288	8.795	1.39727e+06	1.36099e+06	1.06978e+06	1.26061e+06	1.19037e+06	1.59432e+06	1.14805e+06	1.35465e+06	1.11642e+06	1.12376e+06	1.22963e+06	1.24186e+06	882633	967620	933732	1.10172e+06	1.13762e+06
M_0467	1-Fluorosilinane	C5 H11 F Si	118.062	7.867	4550.58	4156.88	4308.87	4334.26	4048.54	3645.47	3594.54	3387.45	3499.13	4587.93	3494.36	5415.71	2716.51	11979.3	2869.3	2702.13	3036.93
M_0468	8-{3-Oxo-2-[(2E)-2-penten-1-yl]-1-cyclopenten-1-yl}octanoic acid	C18 H28 O3	292.201	8.771	329919	202585	173922	161579	255427	96125.3	281176	120635	232489	397092	155434	138850	158966	1.59352e+06	284034	155261	166549
M_0469	1-Dodecyl-2-pyrrolidinone	C16 H31 N O	253.24	9.443	11179.6	11495	9734.25	6736.59	1.59162e+06	123704	1.23673e+06	14110.2	9311.91	20400.8	7962.95	7630.59	7268.23	7078.07	7554.86	8660.85	10701.8
M_0470	3-(imidazol-4-yl)-2-oxopropyl dihydrogen phosphate	C6 H9 N2 O5 P	220.026	4.193	485014	548508	542438	417097	271417	251745	329321	288459	199628	305788	282594	115724	238967	1.57576e+06	674929	867713	554955
M_0471	procodazole	C10 H10 N2 O2	190.074	1.549	515105	372449	698385	49973.4	848381	768548	574575	346361	249057	427918	410907	488663	445262	334943	470785	632302	710445
M_0472	METHOXYMETHYLMELAMINE	C5 H10 N6 O	170.092	5.356	214779	145126	241730	17583.2	157010	88344.1	68998.4	23667.9	179151	120717	711564	140548	480172	61229.3	84255.8	282848	1.5602e+06
M_0473	Palmitoylcarnitine	C23 H45 N O4	399.335	8.317	1.20977e+06	1.23817e+06	1.12109e+06	1.13169e+06	975801	435297	775471	525260	714362	1.15406e+06	1.55455e+06	1.03754e+06	878561	1.36408e+06	208079	243956	829010
M_0474	3-[1,3,3-Tris(allyloxy)propoxy]-1-propene	C15 H24 O4	268.167	8.384	206635	229588	70854.9	1.5527e+06	146145	116777	144475	139327	128938	56358	159164	230482	106503	348528	215154	112860	66747.2
M_0475	bis(2-chloro-1-methylethyl) ether	C6 H12 Cl2 O	170.026	0.596	36520.1	1.19767e+06	33834.8	59618.6	1.14361e+06	1.46151e+06	1.31816e+06	1.07085e+06	35815.6	79341.8	49807.9	71468.1	1.16112e+06	72913.9	68140.4	72862.6	74619.9
M_0476	metharbital	C9 H14 N2 O3	198.1	2.792	43651.4	64245.7	28144.4	35855.1	45998.3	62814.1	48193.1	27010.9	24872.7	60275	47144.7	21881.8	96385.6	1.54997e+06	171933	108566	265082
M_0477	Cinnamoylglycine	C11 H11 N O3	205.074	7.497	1.05463e+06	695241	1.54584e+06	670897	568804	798902	670798	165129	120173	368905	431467	465433	395293	203617	85692.6	150518	330010
M_0478	N-Methyl-2-pyrrolidone	C5 H9 N O	99.0689	3.253	179385	85282.1	44561.2	239135	217887	271790	433158	159179	399746	574975	1.52823e+06	238423	1.37942e+06	336407	331835	633495	653175
M_0479	2729	C9 H14 O2	154.099	8.341	219971	142480	183472	143320	32306.6	1.05647e+06	1.52459e+06	337100	542606	1.16163e+06	213767	194345	191623	29176.5	448199	90396.9	1.32717e+06
M_0480	1913256	C18 H30 O	262.23	9.645	133887	97622.3	11737.4	34961.2	492117	1.52297e+06	355177	114656	49221.2	337469	143587	31241	37999.8	24661.9	83233.5	104935	60131.3
M_0481	[4-[1-(1-cyclopentyl-5-tetrazolyl)propyl]-1-piperazinyl]-(2-furanyl)methanone	C18 H26 N6 O2	358.212	8.881	420746	536679	410312	511002	279962	336298	452159	314893	225326	398421	230875	335441	244880	1.04419e+06	990972	762021	1.52043e+06
M_0482	5-Amino-3-nitro-1H-1,2,4-triazole-1-carboxamide	C3 H4 N6 O3	172.035	1.244	626416	528507	754840	304502	1.19032e+06	424762	1.33074e+06	974807	458717	1.04969e+06	1.51725e+06	946376	820895	376186	581415	578338	690142
M_0483	N-methylethanolamine phosphate	C3 H10 N O4 P	155.035	1.472	166594	19392.3	50930.3	114486	23376.3	23963.8	41175.2	60672.2	606741	45171.1	5841.16	42178.1	18776.1	68305	34134.9	29800.8	23149.2
M_0484	1-Cyclohexenecarboxylic Acid	C7 H10 O2	126.068	7.73	79802.3	151413	47695.1	113933	247556	544814	185263	425452	444072	526141	1.50273e+06	597836	148493	37406.2	16331.7	411560	491646
M_0485	Imidazosagatriazinone	C17 H20 N4 O2	290.173	8.169	1.04347e+06	1.16095e+06	1.49813e+06	1.20386e+06	1.09687e+06	1.47827e+06	1.35358e+06	1.17551e+06	1.37537e+06	1.29344e+06	1.34133e+06	1.25919e+06	912647	791940	666562	819524	518218
M_0486	Thieno[3,4-d]-1,3-dithiol-2-thione	C5 H2 S4	189.905	0.974	1.49044e+06	598799	484768	223945	22709.2	58687.1	57014.1	137461	156866	74819.5	26199.6	63250.8	74663.3	48784	76420.9	13200.3	63824.4
M_0487	4-Nitroaniline	C6 H6 N2 O2	138.043	1.136	320929	1.44321e+06	242897	284157	394213	469168	620174	436347	171530	331078	523090	494226	594427	998613	1.48849e+06	51952.6	259077
M_0488	2-(4-Chlorophenyl)-1,3-dithiolane	C9 H9 Cl S2	215.983	8.4	42678.6	40439.4	41975.6	42986.5	165363	1.36792e+06	1.48451e+06	252849	295997	165871	74327.9	90644.6	150243	38745.5	30078.3	35602	34736.7
M_0489	Thymine	C5 H6 N2 O2	126.043	3.003	946206	516218	708717	753368	701832	516041	629061	671572	718735	549475	1.21616e+06	676605	918321	919573	706334	1.48327e+06	1.05562e+06
M_0490	1,3,9,11-Tetramethyl-5,7-dihydrodibenzo[c,e]thiepine	C18 H20 S	268.129	7.452	373968	273741	331393	361585	585833	412401	1.04828e+06	1.08431e+06	1.4801e+06	389948	862429	481142	109154	18361.3	548963	694130	30903.7
M_0491	6-Methylnicotinamide	C7 H8 N2 O	136.064	1.08	52393.1	28139.7	38387	44289.7	76375.7	87735.8	209655	134476	147454	151881	53507.7	74112.2	62145.2	1.46377e+06	156545	128214	114505
M_0492	Trigonelline	C7 H7 N O2	137.048	1.383	294469	48513.8	86554.2	78344.6	88938.7	264357	169097	163546	46951	127574	58867.9	129023	146772	227245	34274.9	1.45709e+06	499490
M_0493	Vigabatrin	C6 H11 N O2	129.079	0.849	974711	792928	1.44426e+06	1.04267e+06	34820.8	35242.8	33233	4623.22	37640.6	96060.2	19777.3	39418.2	56624.8	565003	15791.4	236907	21216.6
M_0494	1962763	C11 H21 N O4	231.147	1.239	316235	271712	472638	167355	202383	560248	378985	190640	138461	292297	297723	466232	173036	1.4381e+06	342636	401498	290544
M_0495	Gabapentin	C9 H17 N O2	171.126	6.905	538414	291772	840397	155849	728768	1.03505e+06	597560	750803	500917	474087	835501	240610	550029	282040	184317	736130	185098
M_0496	N-Acetyl-L-phenylalanine	C11 H13 N O3	207.09	7.194	621582	188515	950135	318527	395458	530040	621834	310798	216791	245806	171039	312104	92281.2	1.43669e+06	543167	1.13994e+06	503525
M_0497	25-Hydroxy-24-epi-brassinolide	C28 H48 O7	496.338	9.966	1.18598e+06	330071	853018	315562	1.42801e+06	707731	719944	548173	1.32751e+06	1.01141e+06	1.01222e+06	894810	646470	428169	504918	1.0513e+06	477022
M_0498	DL-Homoserine	C4 H9 N O3	119.059	1.295	1.11832e+06	1.04359e+06	1.41957e+06	970162	778630	1.15759e+06	855986	887038	699370	695773	692680	1.01784e+06	964817	758147	712717	781590	520025
M_0499	4329	C9 H12 O	136.089	8.609	238415	105148	164286	313172	583315	158618	73729	607942	85514.5	377662	538598	397481	1.41949e+06	98139.8	51732	201420	761212
M_0500	Uric acid	C5 H4 N4 O3	168.028	1.723	177621	114236	318527	4939.88	389181	747636	908586	230622	132822	583621	391661	227429	594206	1.06897e+06	1.19761e+06	1.09865e+06	1.41687e+06
M_0501	Dibutyl Fumarate	C12 H20 O4	228.135	8.791	1.20128e+06	1.19392e+06	910989	1.06976e+06	984849	1.39508e+06	984334	1.14915e+06	935622	951817	1.07009e+06	1.04418e+06	737255	829528	812032	929530	993521
M_0502	Prolinamide	C5 H10 N2 O	114.079	1.115	206663	224890	404581	239423	140507	223210	122995	160427	129315	152475	157676	207333	146762	1.3945e+06	231000	239489	204743
M_0503	DL-Tryptophan	C11 H12 N2 O2	204.09	2.946	663770	1.3842e+06	735530	683808	426746	119203	367902	1.30515e+06	1.30869e+06	759240	636180	711957	671478	32636.6	12031.1	3319.56	11326.6
M_0504	7-ketodeoxycholic acid	C24 H38 O5	406.272	8.591	176251	113485	129750	29983.6	19123.9	72300.9	17687.5	13850.1	76063.7	94018.7	97625.7	133282	121796	163009	152521	1.3729e+06	874390
M_0505	4-Indolecarbaldehyde	C9 H7 N O	145.053	3.494	508165	875418	895382	537700	1.00405e+06	1.122e+06	790396	780760	868346	790309	743890	1.36689e+06	819411	556923	703941	798177	963611
M_0506	MFCD00229832	C10 H14 O	150.105	8.244	836070	1.02356e+06	1.25984e+06	815609	1.12991e+06	1.36434e+06	976784	988044	1.08415e+06	1.03954e+06	1.02676e+06	1.22209e+06	925615	816168	637301	558123	529426
M_0507	4-Amino-3-hydroxybenzoic acid	C7 H7 N O3	153.043	2.335	169630	164526	88488.4	96818	201752	165660	247011	454321	352442	220213	140073	68921.5	121344	1.35973e+06	306530	272577	342618
M_0508	hodgkinsine	C33 H38 N6	518.318	10.005	541723	395290	407664	257116	1.35696e+06	661133	470544	388794	518673	709003	733412	657737	506351	259190	325922	669223	304105
M_0509	DL-Lysine	C6 H14 N2 O2	146.105	0.988	280011	457381	530184	184449	350095	541847	171694	511773	465541	192311	98698	772639	493028	1.34651e+06	795143	969804	221295
M_0510	trimethadione	C6 H9 N O3	143.058	2.863	98742.2	388249	240529	524447	63746.3	130497	144061	52046.7	28610.4	114146	168586	36324.7	180145	1.33984e+06	70314.9	21251.3	108321
M_0511	Creatinine	C4 H7 N3 O	113.059	1.581	399112	948832	563524	221156	397209	435303	317572	462025	481848	515029	476376	405389	357105	1.3393e+06	548230	448276	242551
M_0512	3-Hydroxy-L-proline	C5 H9 N O3	131.058	1.88	105555	59148	55153.5	111093	102308	170187	98622.1	61962.4	127916	88503.3	75761.2	72072.7	116874	1.33595e+06	184708	87389.3	295759
M_0513	UNII:OUT5YHB7BO	C18 H35 N O2	297.267	9.142	123138	177455	55135.1	99448.1	1.32778e+06	938083	689909	254814	132597	370105	287837	24056.6	56366	95933.8	83756.6	139179	98258.6
M_0514	1-Ethoxy-2,3-difluoro-4-(4-pentylcyclohex-1-en-1-yl)benzene	C19 H26 F2 O	308.196	8.747	166153	272086	51374.1	90836.1	1.3268e+06	14278.5	11109.7	139540	13014.5	1.17479e+06	1.19336e+06	127661	16351	814049	8826.55	9221.97	18238.5
M_0515	Thiomalic acid	C4 H6 O4 S	149.998	7.531	135769	44410.9	86323.9	51604.8	71754.7	710192	907618	387807	430201	535282	679595	968470	76831.8	80877.1	64910.5	15139.4	25202
M_0516	LysoPC(18:3(9Z,12Z,15Z))	C26 H48 N O7 P	517.314	9.588	7858.41	8643.91	5699.43	430095	5468.23	5382.05	5075.04	11091.1	6795.87	5233.03	4998.2	10038.7	4658.98	153071	5036.66	4912.85	5893.98
M_0517	Bohemine	C18 H24 N6 O	340.201	8.948	320581	728648	245053	207572	325422	293353	428522	643229	442767	711500	249585	203739	305056	711833	1.32266e+06	214066	806612
M_0518	DL-Tryptophan	C11 H12 N2 O2	408.18	3.499	151920	493623	439421	183108	882804	944219	478830	619996	579398	330194	475372	795644	503997	181949	391927	523276	621842
M_0519	Taurine	C2 H7 N O3 S	125.015	1.356	727064	1.31877e+06	819954	845522	524064	392408	1.20707e+06	920043	932554	1.00407e+06	1.20438e+06	829168	626183	719639	758312	629327	815561
M_0520	5-Hydroxy-DL-tryptophan	C11 H12 N2 O3	220.085	1.548	88697.5	101943	178757	20344	233769	201642	146475	80326.8	69255.8	147175	99097.7	139620	128651	118952	123870	159917	255770
M_0521	3-(Dodecylamino)-2-hydroxy-2-cyclohexen-1-one	C18 H33 N O2	295.251	8.927	208613	172837	59332.1	80550.9	1.31375e+06	986962	859761	253875	178780	419214	249590	28099	49605.1	92856.1	111350	190707	56169
M_0522	GB ACID	C4 H11 O3 P	138.045	6.147	289.243	265.119	259.006	267.998	251.656	253.085	275.43	265.404	268.184	240.141	263.834	278.34	243.629	220.66	252.988	287.818	283.368
M_0523	g-Butyrobetaine	C7 H15 N O2	145.11	2.955	87554	85208.7	107774	73261.1	208961	219754	201839	170347	145818	85908.7	101515	203410	173763	1.29505e+06	455366	586348	290058
M_0524	1,1,1-Trifluoroacetone	C3 H3 F3 O	112.014	1.596	301111	420433	319466	315752	1.12359e+06	519014	530082	448343	550417	453660	514074	478238	486116	143701	439675	477751	622243
M_0525	1,1,1-Trifluoroacetone	C3 H3 F3 O	112.014	1.535	301111	338490	291013	260847	444514	397770	325382	351615	550417	259413	281517	412927	486116	101147	371812	420995	694628
M_0526	Piperonylonitrile	C8 H5 N O2	147.032	5.778	1.0632e+06	1.04195e+06	1.10687e+06	653403	313777	538638	236337	341089	230786	268970	643980	844576	864023	250217	240299	547412	834427
M_0527	Creatinine	C4 H7 N3 O	113.059	1.469	457103	365976	88794	259375	731237	751212	111937	723715	54431	494388	796096	503361	932663	44981.3	43346.2	568165	162921
M_0528	Guanosine monophosphate	C10 H14 N5 O8 P	363.058	2.252	1.06958e+06	1.28438e+06	1.16969e+06	1.02252e+06	343469	551265	352211	248648	429598	383576	466607	345813	392489	23521.4	340420	53573.8	587627
M_0529	Malondialdehyde	C3 H4 O2	72.0211	1.126	624521	773692	651710	720972	454909	545631	654683	637909	461282	493858	564513	494443	747159	1.27974e+06	426669	129465	284335
M_0530	2-Butoxyethanol acetate	C8 H16 O3	160.11	8.12	867060	801029	914663	962246	1.16474e+06	1.16893e+06	1.15544e+06	785463	821370	984740	1.07606e+06	1.27765e+06	884041	805449	341582	250167	580002
M_0531	2-Ethoxy-4-hydrazino-6-(1-piperidinyl)-1,3,5-triazine	C10 H18 N6 O	238.155	8.69	19377.1	22324.3	24954.6	23375.9	41676.5	16434.2	24656	34119.9	29160.3	32825.7	35983.1	66360.8	84294.2	24592.5	25711.8	37724.3	96021.4
M_0532	Choline Alfoscerate	C8 H20 N O6 P	257.103	1.419	144255	285136	168690	319570	166151	332802	239287	225089	151769	248698	194113	130687	390138	56641.5	46822.5	14372	198031
M_0533	1-Boc-4-piperidinol	C10 H19 N O3	201.136	8.126	836886	769978	890762	926340	1.15254e+06	1.14098e+06	1.14574e+06	772581	789657	969152	1.0605e+06	1.25327e+06	863991	805682	334126	231958	574282
M_0534	Palmitelaidic acid	C16 H30 O2	254.224	8.659	915828	1.10859e+06	1.0367e+06	883350	718013	898001	709591	892968	961979	1.25076e+06	837756	808296	787213	811212	711218	928316	531558
M_0535	1,1'-[1,2-Ethanediylbis(imino-2,1-ethanediyl)]di(2,4-imidazolidinedione)	C12 H20 N6 O4	312.155	8.174	289163	936950	1.2471e+06	974599	901888	1.20961e+06	1.14711e+06	991510	1.15757e+06	1.12921e+06	68674.1	1.04728e+06	778437	654501	544434	696021	179303
M_0536	Octylbenzene	C14 H22	190.172	8.54	15127	15010.7	1.237e+06	72960.4	21763.3	72392.1	61194.7	65469.2	11915.9	15298.8	71471.7	191486	65255.4	59442.7	66383.3	9052.22	64675.1
M_0537	glycyclamide	C14 H20 N2 O3 S	296.119	4.32	1.21919e+06	195459	228427	381569	3989.14	4399.55	4250.82	4191.13	4107.17	4181.21	4152.73	4206.7	4197.24	4438.73	4180.52	4309.51	4223.13
M_0538	1',3'-Dimethyl-1,4':5',1''-terimidazolidine-2,2',2''-trione	C11 H18 N6 O3	282.144	8.121	156879	197066	221561	1.2186e+06	220858	190681	251294	222624	322778	137625	252546	267196	91276.3	43375.4	74321.3	36942.5	14729.1
M_0539	bis(tetrazolyl)amine	C2 H3 N9	153.051	1.305	487580	1.07243e+06	777997	1.18204e+06	841058	1.21824e+06	714833	1.13123e+06	556506	787308	889720	666281	1.16831e+06	241027	206996	176108	199046
M_0540	Adenosine 5'-monophosphate	C10 H14 N5 O7 P	369.045	1.396	332607	292566	338882	191746	432757	294817	349133	226836	188451	368371	284698	482622	416093	10189.2	301853	5860.01	507649
M_0541	Eicosapentaenoic acid methyl ester	C21 H32 O2	316.24	9.402	1.1967e+06	157242	327996	357620	38413.2	23076.9	41883.1	45639.5	77091.5	56196.5	26722.9	59939.5	33187.9	125611	206483	58430.6	174120
M_0542	LysoPC(18:3(9Z,12Z,15Z))	C26 H48 N O7 P	517.319	9.701	166116	307580	44195.1	27638.7	35044.5	59737.3	34426.1	32229	16075.8	61892.7	4683.55	38956.8	47826.3	7907.29	52807.9	58199.5	226275
M_0543	Guanylmelamine	C4 H8 N8	168.087	0.846	468696	648761	1.19477e+06	1.08874e+06	663738	990558	453107	530973	480300	453266	550303	1.00955e+06	601216	680716	1.08592e+06	826383	322893
M_0544	Pyrrolo(2,1,5-cd)indolizine	C10 H7 N	141.058	3.501	560812	812648	773422	460011	811860	821146	627222	655645	751828	652661	606569	1.17723e+06	630173	406201	563727	604301	764760
M_0545	Hexadecanamide	C16 H33 N O	255.256	9.798	200470	201262	94517.6	97333.6	518901	1.19252e+06	346098	185371	120721	400782	209159	63770.7	61435.6	139009	189096	216726	78850.6
M_0546	1H-Tetrazolo[1',5':2,3][1,2,4]triazino[5,6-b]indole	C9 H5 N7	211.061	7.823	1.03177e+06	657376	1.18857e+06	491134	215310	439464	382635	146551	53130.4	314264	319084	431960	260755	296276	898067	360358	1.03026e+06
M_0547	1-carboxy-3-hydroxyadamantane	C11 H16 O3	196.11	7.668	166290	106374	15123.1	79592.7	80044.1	27992.1	120343	705400	649902	189055	174472	1.18435e+06	64915.4	56296.3	78712.3	107257	106962
M_0548	N-Oleoyl-L-Serine	C21 H39 N O4	369.288	8.012	154496	470203	178733	273597	237290	164898	431445	290914	433166	671802	493398	236796	351729	1.17556e+06	212985	85802.9	325485
M_0549	2878846	C20 H26 O3	314.188	8.629	41378.9	81477	135561	155453	82787	95351.8	32055.1	63960.3	90126	103500	71510.4	86545	31972.6	1.16947e+06	201432	336672	375414
M_0550	L-alpha-lysophosphatidylcholine	C22 H46 N O7 P	467.302	9.585	628164	790708	693207	570101	1.10055e+06	702191	821846	642469	702681	668211	588564	883573	544448	189565	418965	940371	1.16378e+06
M_0551	AC-VAL-OH	C7 H13 N O3	159.09	3.26	49284.7	130458	72717.9	149989	100162	120278	127638	72320.5	276734	461017	1.16249e+06	186267	1.11919e+06	338925	295512	425827	410375
M_0552	(+)-Aphidicolin	C20 H34 O4	320.233	9.147	600989	1.1543e+06	590246	741711	488158	623864	597828	1.05233e+06	728785	1.06258e+06	657526	430444	493824	487802	380101	209059	697819
M_0553	Arsonate	H As O3	123.916	0.983	1.15387e+06	516048	268752	333193	39749.6	70512.3	56369	109770	102660	93751	99494.2	80465	62330.9	84699.6	78416	22284.8	83696.3
M_0554	5-Hydroxyindole-3-acetic acid	C10 H9 N O3	191.058	6.326	1.15382e+06	387514	413862	159138	186031	868239	397814	109531	439994	241851	747268	619131	664140	353895	382244	495520	776033
M_0555	Xanthine	C5 H4 N4 O2	152.034	1.904	182921	461038	347310	3436.53	212729	722098	511129	414343	327530	19920.4	459544	42405.6	411415	891335	897308	184357	1.15227e+06
M_0556	Hexylresorcinol	C12 H18 O2	194.131	8.644	157811	274743	347776	326027	145162	155396	126366	125444	349796	268310	293600	391843	149118	394739	226652	835008	1.03793e+06
M_0557	1-benzylimidazole	C10 H10 N2	158.084	3.495	535570	772840	748353	441784	764951	778832	589152	628977	724406	609906	572882	1.13979e+06	604545	380906	529193	581888	721311
M_0558	2802	C8 H16 O	128.121	9.226	701203	773094	700536	840339	818031	1.13857e+06	535368	676181	855432	889973	616057	1.09257e+06	475553	613285	452197	645229	839345
M_0559	2-(5-Benzo[1,3]dioxol-5-yl-tetrazol-2-yl)-1-morpholin-4-yl-ethanone	C14 H15 N5 O4	317.112	1.624	173414	258486	339227	301434	229460	444757	329807	580072	339612	307968	860788	269999	265957	1.13586e+06	134668	1566.5	152671
M_0560	monomethyl phosphate	C H5 O4 P	111.993	1.455	846724	1.13548e+06	759595	514174	122507	106341	58646.8	276338	263839	180795	228971	231193	118524	8112.68	19611.3	4239.53	21252
M_0561	1-(3-Aminopropyl)-2-hydroxy-3-oxo-1-propyltriazane	C6 H16 N4 O2	176.127	1.137	16096.8	14959.8	18138.5	18939.7	17018.1	17593.2	16950.8	17017.8	15811.9	15058.7	17396.1	17010.6	14576.9	14287	13927	1.12043e+06	12941.8
M_0562	Thiomorpholine	C4 H9 N S	103.046	1.223	420380	524439	939287	650062	670900	1.11816e+06	837630	506529	276159	246016	404753	905779	382180	424595	510935	789775	428672
M_0563	DL-Lysine	C6 H14 N2 O2	146.105	1.244	1.10774e+06	894149	1.03636e+06	560281	901041	539953	632860	453803	431803	493525	402944	808998	954060	1.11299e+06	523760	260500	281480
M_0564	4,4-Dimethyl-1-hexyne	C8 H14	110.11	9.224	676587	743025	675176	810801	790049	1.11214e+06	514230	653559	840060	861517	593660	1.08097e+06	467198	594188	430485	622579	815755
M_0565	Diethyl diallylmalonate	C13 H20 O4	240.136	7.845	140618	459589	36935.8	1.1097e+06	389765	560638	417457	567113	814890	861445	467186	727333	231957	883803	136404	183664	224911
M_0566	AD8050000	C8 H10 N2 O	150.079	0.877	7814.39	7545.19	7768.24	8204.62	8007.84	7486.59	8134.89	7987.48	7675.13	7943.63	8480.7	7373.66	8042.54	8043.97	8282.59	8076.14	7512.89
M_0567	2-Indolylformic acid	C9 H7 N O2	161.048	4.897	2601.95	3652.48	3633.27	3734.09	3369.11	3785.15	4500.82	3463.39	3433.25	3469.68	3470.31	3515.48	3610.55	6635.21	5719.54	7024.02	3641.8
M_0568	2-Chloro-1,3,2-oxathiaphospholane	C2 H4 Cl O P S	141.941	1.385	229368	714288	952830	1.0871e+06	253066	446308	560099	178356	425768	220036	193922	202453	496937	666525	272696	81566.7	103737
M_0569	4-Morpholino-1,3,5-triazin-2-amine	C7 H11 N5 O	181.096	1.742	644341	540467	202971	305267	482341	306221	497812	829328	1.08337e+06	804763	934297	315369	786524	82730.5	170523	20327.5	122892
M_0570	cyclandelate	C17 H24 O3	276.172	8.499	681082	588581	858777	366033	850302	607767	461753	681677	442679	400225	606137	1.00811e+06	581196	303088	1.08031e+06	365140	340699
M_0571	Terazosin impurity n	C9 H16 N2 O2	184.121	3.635	5110.69	7486.63	3561.55	10677.5	4845.87	6660.17	4846.26	5905.36	5965.05	12760	6185.84	5502.21	2689.65	1.07985e+06	43680.9	48826.1	44726.1
M_0572	tert-Butyl N-[1-(aminocarbonyl)-3-methylbutyl]carbamate	C11 H22 N2 O3	230.163	2.31	1.05833e+06	107293	140397	223506	2102.54	2550.58	2531.99	2324.2	2292.57	2049.81	2215.78	2358.27	2317.25	4071.1	3243.32	3436.02	3533.02
M_0573	4-Amino-N'-[2-(1-piperidinyl)acetoxy]-1,2,5-oxadiazole-3-carboximidamide	C10 H16 N6 O3	268.128	7.096	31580	26091.1	16870.5	19864.1	25373.8	23832.5	27856.1	34312.8	1.05361e+06	19742.3	29762	29241.1	10471.6	10476.1	13643.6	35497	11336.2
M_0574	Thieno[3,4-d]-1,3-dithiol-2-thione	C5 H2 S4	189.905	1.055	1.05083e+06	601264	461070	257185	88701	73884	55421.2	127577	87971.2	95938.4	214561	86599.9	68755.4	124764	174013	30914.5	110293
M_0575	5-Amino-3-nitro-1H-1,2,4-triazole-1-carboxamide	C3 H4 N6 O3	172.035	1.15	637086	527189	692033	477477	146759	434995	343427	974807	458717	1.04969e+06	429893	946376	820895	331131	133409	230313	295299
M_0576	Bufadienolide	C24 H34 O2	354.256	8.57	142751	104439	201782	41050.6	9726.9	53509.7	13443.8	20365.2	82651.2	62443.4	208750	154315	121174	24677.7	39338	480407	1.04924e+06
M_0577	4-Amino-N'-[2-(1-piperidinyl)acetoxy]-1,2,5-oxadiazole-3-carboximidamide	C10 H16 N6 O3	268.129	7.595	141339	207650	253941	440856	744893	828687	1.04828e+06	67962.1	35086.1	235769	862429	43464.9	63409.7	443512	13845.9	291448	405021
M_0578	ACETYL PROLINE	C7 H11 N O3	157.074	3.053	32133.1	4667.71	4590.9	38259.7	6500.67	29714.9	28658.3	18414.4	9862.26	9973.46	16111.2	15344.7	36255.2	1.04802e+06	94075.1	194490	24558.8
M_0579	OB4520000	C10 H9 N O	159.069	7.462	23471.6	10913.5	12583.3	49221	23916	18089.8	10665.1	10005.7	25322.6	9631.08	10238.8	10619.8	17381.2	24122.7	18945.6	23750.3	23588.1
M_0580	Adenosine 5'-monophosphate	C10 H14 N5 O7 P	331.089	1.394	321594	279915	312377	184788	339178	250949	297493	212368	171393	298770	249500	392557	345189	10144.3	247840	5023.23	401747
M_0581	N-Boc-L-valine	C10 H19 N O4	217.131	1.095	491159	758929	139641	556332	486370	847211	750627	302016	273055	6055.21	727236	826423	750136	318490	557967	337726	2031.88
M_0582	5-Hydroxy-DL-tryptophan	C11 H12 N2 O3	220.085	2.783	410118	569352	536603	1.04218e+06	257208	237651	187164	289512	500501	254931	228154	158457	236920	19950.5	44657.2	205064	45854.6
M_0583	Gly-Lys	C8 H17 N3 O3	203.127	1.223	26982.2	22803.9	26965.5	23198.7	39627.9	27502.4	65915.8	22278	21529.4	31539.9	24775.9	24842.3	28523.1	1.04077e+06	145377	479212	122816
M_0584	DL-Stachydrine	C7 H13 N O2	143.095	1.435	564996	368844	559918	423358	361884	1.03489e+06	938308	105174	148689	568589	126098	483300	329968	601936	568401	734059	849099
M_0585	MFCD02123047	C8 H11 N3 S2	213.04	5.007	7665.17	15199.5	12011.4	3262.69	26753.4	44563.9	34555.8	27422.2	22079.2	40793.2	40101.2	26941.2	39431	308353	76987.9	82614.3	183009
M_0586	1-stearoyl-sn-glycero-3-phosphoethanolamine	C23 H48 N O7 P	481.317	9.97	453643	642733	447165	384085	476462	530516	444133	569478	422431	319105	517348	397710	383237	336638	466000	1.0291e+06	479649
M_0587	N-Acetylornithine	C7 H14 N2 O3	174.1	1.144	88364.2	55004	63866.5	59256.4	119452	154928	118714	116680	67058.9	101990	93015.4	136083	159140	986505	1.02889e+06	629593	989172
M_0588	lactide	C6 H8 O4	144.042	1.149	900954	535575	902718	1.02867e+06	704869	785534	864486	870199	797052	691277	909147	660530	563813	127705	298787	570463	252543
M_0589	D-(+)-Maltose	C12 H22 O11	364.098	1.146	696083	317542	692234	1.00309e+06	231305	189943	370846	212675	139007	136380	163789	146358	1.02266e+06	901876	441112	462058	484467
M_0590	3,5-Diamino-N-carbamimidoyl-2-pyrazinecarboxamide	C6 H9 N7 O	195.087	7.157	276785	1.01616e+06	153979	529806	126370	14240	337260	204539	171963	467010	625384	100436	8116.93	48279.5	64611.5	6127.53	25052.3
M_0591	3,5-Diamino-N-carbamimidoyl-2-pyrazinecarboxamide	C6 H9 N7 O	195.087	7.173	276785	1.01616e+06	153979	529806	126370	110019	337260	204539	171963	467010	625384	100436	165603	48279.5	64611.5	6946.77	188557
M_0592	N-Acetyl-DL-tryptophan	C13 H14 N2 O3	246.1	7.288	382308	444855	685450	367345	388445	412740	489205	358222	325648	554965	350477	452798	145591	1.01439e+06	470478	379039	984288
M_0593	Citric acid	C6 H8 O7	192.027	2.124	42501.2	42639.6	54858.2	206507	44177.4	57571.8	125851	40051.5	34629.9	39733.6	226570	45890.6	58567.6	969623	48307.4	75086.3	1.00661e+06
M_0594	GV9100000	C8 H12 O	124.089	8.058	307394	37621.3	498509	996908	133640	264466	461346	95281.1	39843.7	270941	29084.9	380623	50220.9	83127	415505	428238	85534.3
M_0595	2-[1-Hydroxy-2-(trimethylammonio)ethyl]-3-oxododecanoat	C17 H33 N O4	315.241	9.398	1.00162e+06	176180	321627	301181	32323.2	34193.5	46928.1	50701.7	82312.3	57416.1	38753.4	62581.6	35699.4	110109	162453	59966.2	156607
M_0596	2,4-Quinolinediol	C9 H7 N O2	161.048	7.451	391941	540982	1.00098e+06	243713	446263	551493	281962	262799	124439	479378	27814	105178	351177	149124	93355.1	190976	27049.7
M_0597	Boc-Gln-Oh	C10 H18 N2 O5	246.121	2.523	271462	358206	372409	272347	149029	237390	184511	204585	109500	224329	212929	190892	228448	999810	467062	427749	472610
M_0598	Uracil	C4 H4 N2 O2	112.028	1.531	522966	786061	478000	498463	413855	696263	996542	523243	210475	633455	653897	262954	636375	362017	494932	303292	364933
M_0599	L-gamma-Glutamyl-L-leucine	C11 H20 N2 O5	260.137	4.053	366919	378046	419964	282759	239849	442875	318392	232852	113164	319542	241392	276976	318702	996407	433399	489249	546199
M_0600	4-(1,4-Dioxaspiro[4.5]dec-8-yl)cyclohexanone	C14 H22 O3	238.157	9.041	357925	744240	462537	79415.5	995368	483189	753385	599796	749848	488321	505709	450843	514117	301355	342597	116736	441817
M_0601	Butyl O-phosphonoserinate	C7 H16 N O6 P	241.072	1.098	990008	554750	690885	583373	139394	168830	162573	170756	192444	196328	226990	122428	144556	113829	62992.6	57463	55330.3
M_0602	[(2-Hydroxytetradecyl)sulfinyl]acetic acid	C16 H32 O4 S	320.203	10.488	423529	988067	159252	268555	2379.68	483065	525801	643553	360112	13918.7	52793.6	215261	592046	46873.7	515575	109227	320969
M_0603	(2-Dodecen-1-yl)succinic anhydride	C16 H26 O3	266.188	8.952	504040	794399	534502	931518	632557	966458	469877	603074	856437	590906	576571	757650	529331	620090	415023	928538	864363
M_0604	TRIMETHYLALLYL ISOCYANURATE	C15 H21 N3 O3	291.158	1.515	216330	406410	775142	5013.6	403919	859256	229631	175120	94996.6	166813	168050	472293	236865	384296	533004	982595	486295
M_0605	2'-Deoxy-5'-O-phosphonatocytidine	C9 H12 N3 O7 P	305.04	1.163	62400.8	122898	41732.3	71262.2	52005.5	65652.4	86737.3	77224.1	57972.3	92341.7	99857.9	59242.6	80115.7	978024	214911	219354	324014
M_0606	[1,4-Phenylenebis(methylene)]bis(phosphonic acid)	C8 H12 O6 P2	266.01	4.698	37980.9	82446.7	47836.1	74086.6	51016.5	45221.6	72207.6	36980.7	71371.8	55737.3	34839.8	38333.6	35193.1	975736	52136.6	157675	178824
M_0607	Norethindrone	C20 H26 O2	298.193	8.707	21658.9	24569.5	41833.8	23462	13242	7322.15	1672.37	6437.49	18555.8	13286.6	2590.16	3323.03	4744.21	478691	305595	545615	973766
M_0608	2-[(6-Amino-7H-purin-8-yl)amino]ethanol	C7 H10 N6 O	194.092	8.182	64946.6	8515.66	60020.2	970263	118830	115050	118862	27269.6	31841.3	141156	62249.2	133921	95152.5	96698.4	79142.7	78126.2	82570.8
M_0609	Methyl palmitate	C17 H34 O2	287.282	7.761	325296	277609	246883	232244	212727	337804	159001	487460	305614	361194	313262	468548	178623	173585	106749	141172	136067
M_0610	1-(p-Tolylsulfonyl)pyrrole	C11 H11 N O2 S	221.051	7.81	342300	400043	163019	327985	526360	648070	409434	197448	266038	361003	517868	307729	195006	147445	166842	43637.9	355880
M_0611	L-Glutamic acid	C5 H9 N O4	147.053	1.283	615555	964604	616832	670058	317768	336975	470359	595675	323387	403992	441666	466351	385738	280696	536220	175106	314089
M_0612	trans-beta-Nitrostyrene	C8 H7 N O2	149.048	4.599	962777	399176	843448	674947	243446	399843	365594	165307	154649	298181	379250	407384	297312	60395.1	54709	132814	241044
M_0613	3408	C13 H22 O3	226.157	8.587	664702	624108	584951	648258	704876	572523	585098	659516	693441	644722	635314	765625	474485	580409	398198	538301	491571
M_0614	6-Methyl[1,2,4]triazolo[4,3-b]pyridazin-8-ol	C6 H6 N4 O	150.054	2.325	15253.4	36415.5	44417.2	27990.9	125346	60195.2	360444	441117	957854	449996	441236	319125	295062	170680	59461.6	121384	40552
M_0615	1,1'-(3,6,9,12-Tetraazatetradecane-1,14-diyl)di(2,4-imidazolidinedione)	C16 H30 N8 O4	398.239	8.433	636061	805869	314957	777854	955874	205421	533887	316709	422958	26827.8	118962	660487	9937.27	604148	168929	178179	138334
M_0616	(2,2,6,6-Tetramethyl-4-piperidinyl)acetic acid	C11 H21 N O2	199.157	7.902	163110	151367	252164	390068	176712	953910	322076	561713	333912	401352	524916	798623	200783	209168	142996	173618	61848.7
M_0617	L-Histidine	C6 H9 N3 O2	155.07	0.827	394609	448735	374926	561540	874577	701924	638194	352441	425701	570684	421500	580209	658945	337098	762266	792960	953170
M_0618	1-(2-Methyl-2-propanyl)-1,3-cyclopentadiene	C9 H14	122.11	7.826	97476.2	115698	138721	542733	141993	357128	272624	268596	86472.5	166548	948939	406088	144127	53961	28992.5	39187.8	25917.9
M_0619	N-Acetyl-L-phenylalanine	C11 H13 N O3	207.09	7.293	617647	196403	948214	241954	236802	524405	675316	79190.8	12241.1	237075	187052	274694	101482	77900.6	42854	46675	339155
M_0620	Indole	C8 H7 N	117.058	7.536	3625.94	3509.31	3509.62	3527.13	3696.36	4239.2	3634.95	3320.73	3493.8	3657.38	3588.08	3741.06	2259.7	2727.15	2460.53	2272.61	2245.26
M_0621	PALMITYL 3,5-DI-TERT-BUTYL-4-HYDROXYBENZOATE	C31 H54 O3	474.408	9.122	2680	933852	132179	10087.8	2632.32	2493.6	2856.95	2641.83	2726.57	2536.8	2551.26	2619.52	2360.54	3804.58	3553.93	3010.1	4067.42
M_0622	N-lauroylethanolamine	C14 H29 N O2	243.22	8.656	581326	834918	864544	727385	620060	770709	633477	816684	743837	933582	693547	679730	610605	615801	468635	760415	404926
M_0623	Oxprenolol	C15 H23 N O3	265.165	8.291	348271	312586	440262	369806	723917	705530	566188	367729	397982	421767	417807	621562	501702	209198	278603	252261	196715
M_0624	Methyl isonicotinate	C7 H7 N O2	137.048	1.44	294469	77287.6	103982	96352	88938.7	264357	169097	163546	46951	127574	58867.9	194058	146772	408937	318130	932883	499490
M_0625	Sorbic acid	C6 H8 O2	112.053	0.709	83684.7	120133	88432.3	29249.6	787006	931083	228652	636348	651829	231648	80520.4	90380.5	136172	525181	208467	364639	212089
M_0626	PALMITYL 3,5-DI-TERT-BUTYL-4-HYDROXYBENZOATE	C31 H54 O3	474.408	9.224	2680	928814	206005	4282.39	5274.02	3742.51	4775.6	3751.79	3982.09	3476.09	3292.23	3710.35	3041.14	3255.23	3253.64	3237.07	4305.58
M_0627	Glyphosate	C3 H8 N O5 P	169.014	5.783	850739	763346	910811	531847	230839	395170	209083	306665	200900	100845	442603	631226	605165	166565	177571	458544	545454
M_0628	MFCD00152656	C18 H37 N O3	315.277	8.699	388003	124615	217257	116557	923242	123708	859402	93240.3	177944	249034	148426	103013	102729	93593.3	132427	76152	31213.2
M_0629	gamma-Glu-gln	C10 H17 N3 O6	275.112	1.156	204968	23176.8	156929	87751.2	335452	439444	255068	207779	344974	321742	197913	466631	379335	274287	846656	922176	692950
M_0630	celiprolol	C20 H33 N3 O4	379.249	9.16	221168	354282	353487	200488	325545	278647	352541	317921	145720	286543	253098	463557	196900	249656	575426	784862	879499
M_0631	cyclandelate	C17 H24 O3	276.172	8.804	544376	566543	918264	738092	495524	491200	326115	383079	427283	374676	298626	585422	267756	250145	280976	404472	180053
M_0632	dioxanone	C4 H6 O3	102.032	1.347	917957	33704.9	186977	701362	396366	455464	556843	142088	322083	390200	288343	115802	381844	47061.7	135827	791368	250776
M_0633	Nithiazide	C6 H8 N4 O3 S	216.031	6.415	105900	135805	106485	57359.4	84976.7	55624.2	63857.5	71657.6	96166.1	50865.5	49705.4	41052.7	68482.9	916004	138409	446096	239556
M_0634	2268966	C13 H25 N O4	259.178	4.418	337406	719309	618465	286697	218664	274738	915064	267595	351427	680900	569039	290396	473834	586700	480468	171342	682841
M_0635	SSR161421	C25 H20 N4 O2	386.173	8.321	915012	858032	873519	485809	789106	884870	809984	702392	913393	831600	721770	812345	394337	551116	333200	510371	305606
M_0636	Ethyl 2-oxocyclohexanecarboxylate	C9 H14 O3	170.094	7.812	71365.8	139952	73949.6	80896.7	186793	794599	313039	330113	391634	303803	352102	54793.7	145020	364082	329994	296047	305074
M_0637	2,2,2-Trifluoro-1-phenylethyl azide	C8 H6 F3 N3	201.051	4.467	8978.14	772825	842063	769514	729077	29318.8	779531	776071	93071.1	60706.8	21964.6	10853.6	49264.2	755683	75499.5	61432.9	40609.8
M_0638	4,9-Dioxo-3,5,10-trioxa-8-azatridec-12-en-1-yl methacrylate	C13 H19 N O7	301.116	6.768	299782	253018	228654	170219	143331	127080	157198	44886.4	66007.4	84185.2	314396	178854	128474	312497	100760	248133	904186
M_0639	CU5250000	C8 H5 N O	131.037	8.55	85923.5	114245	181323	50084	175897	220445	391300	64461.8	81803.1	130034	340878	386468	383635	900155	390602	561850	695934
M_0640	4-Vinylpyridine	C7 H7 N	105.058	2.777	893609	150165	325011	69133.7	39400.4	104724	79633.5	31776.7	77200.2	73358.6	77060.9	151876	111288	3643.45	12852.4	11701.6	119981
M_0641	3-Hydroxy-L-proline	C5 H9 N O3	131.058	1.112	736974	886884	762300	811206	418907	343326	661361	733695	632813	347898	591067	483714	420941	126197	383229	578221	295551
M_0642	7H-Pyrrolo[2,3-d]pyrimidine-2,4-diol	C6 H5 N3 O2	151.039	0.791	885723	572714	690563	862397	1333.67	451860	238551	182894	105467	144157	193083	190810	162840	757083	433232	305172	708453
M_0643	lamtidine	C18 H28 N6 O	344.233	9.179	258452	487213	193609	251711	177994	194112	307562	301676	157736	575925	107053	191604	181529	551089	655969	200222	884255
M_0644	DL-Stachydrine	C7 H13 N O2	143.095	1.325	117932	65480.5	333488	49048.5	46956.3	287716	76705.8	46134.4	30500.5	77124.2	39158.4	90467.6	56418.9	470068	61469.4	876513	155968
M_0645	1-[(4,6-Diamino-1,3,5-triazin-2-yl)amino]-2-propanol	C6 H12 N6 O	184.107	6.897	5783.27	17299.7	593720	3739.87	250260	656089	131442	377447	367123	20639.7	202729	14097.2	287445	179049	27133.8	319970	23023.2
M_0646	N.pi.-Methyl-L-histidine	C7 H11 N3 O2	169.085	1.427	128864	179188	120331	101267	195198	356785	190995	184111	228370	218827	196415	145685	258138	857372	164468	69903.8	306434
M_0647	Platelet-activating factor	C26 H54 N O7 P	523.364	10.812	6129.99	10235.5	5033.5	5751.25	26891.8	19059	7768.44	19774	9936.52	73354.8	20160.5	20926.7	11420.5	7242.09	5681.53	4652.09	402149
M_0648	MFCD00467204	C8 H11 N3 O S2	229.035	5.33	295486	184136	234700	65373.6	122787	359360	161844	67181.3	140146	255055	194396	163245	324808	854921	151212	196748	211032
M_0649	AC-VAL-OH	C7 H13 N O3	159.09	5.017	425809	312549	496958	288548	196350	388117	624851	75691.5	58815.5	455932	764039	480005	854750	206950	215660	77039	286132
M_0650	[4-(Phenylsulfanyl)phenyl]methanol	C13 H12 O S	216.061	1.215	503885	376161	578028	697164	769072	575273	501061	582386	667572	559716	487043	537833	853802	148984	250907	142143	270161
M_0651	4,6-Bis(dimethylamino)-1,3,5-triazine-2-carbohydrazide	C8 H15 N7 O	225.134	6.907	271385	48058	591774	44259	248102	636577	241297	376526	366661	203637	526268	202641	286909	178392	106074	319085	81228.1
M_0652	2,4a,9-Trimethyl-2,3,4,4a,9,9a-hexahydro[1,2]oxazino[6,5-b]indol-6-yl octylcarbamate	C22 H35 N3 O3	389.268	8.526	729964	734738	658496	632642	634405	743644	588835	708145	695639	784043	781460	851493	580676	430991	471453	525197	506012
M_0653	FZ5600000	C27 H44	368.344	9.454	7606.22	20422.5	319973	526800	383636	184071	172461	89980.5	85098	461562	418806	322623	780795	33979.3	765664	200906	851106
M_0654	5-(pentylthio)-1,3,4-thiadiazol-2-amine	C7 H13 N3 S2	203.056	1.262	316788	552280	233393	408545	175176	846670	524455	498695	231232	16551.8	377092	378225	448238	600269	262049	445288	288650
M_0655	4,4-Dimethyl-1-hexyne	C8 H14	110.11	8.627	264540	211850	261551	220857	285204	341677	204371	227627	244171	260902	412426	332656	176563	203677	214566	297873	746207
M_0656	Trigonelline	C7 H7 N O2	137.045	1.231	141071	44459.8	264961	117229	95559.2	268214	293894	365318	134697	137601	128110	236105	601235	51678.9	413840	841693	564125
M_0657	2-Isopropyl-5-methylbenzoic acid	C11 H14 O2	178.099	8.426	29456.6	63439.5	18758.3	27566.6	45492.5	206723	26225.3	209560	224861	102696	217874	179465	131341	24232.9	13441.6	24174.9	42670.3
M_0658	Acetyl-L-methionine	C7 H13 N O3 S	191.062	4.534	361375	223655	462818	267844	239287	468234	437302	221821	147227	220254	201736	184354	161585	838158	374181	440305	412217
M_0659	METHOXYMETHYLMELAMINE	C5 H10 N6 O	170.092	5.538	162657	30140.5	374401	8168.11	46149.8	54048.7	57558.9	7428.53	140245	71779.3	545370	148905	307521	43729.1	156562	221645	835135
M_0660	negamycin	C9 H20 N4 O4	248.148	1.411	69524	165239	118737	97350.1	250729	245364	402820	205373	240399	231849	235357	512526	238199	214320	208817	31231	567168
M_0661	1,3-Dihydro[1,2,5]oxadiazolo[3,4-b]pyrido[2',3':5,6]pyrazino[2,3-e]pyrazine	C9 H5 N7 O	227.056	7.495	569207	384716	824414	365650	313798	444908	367860	96815.2	73161.5	166676	223854	235731	200093	124607	46965.9	85758.8	148774
M_0662	Bucillamine	C7 H13 N O3 S2	223.034	6.039	628357	491183	824238	574389	61887.6	158316	12880.6	14282.7	11361.3	86129.2	294864	58339.4	133111	54410.1	21447.1	404340	129482
M_0663	AMOZ	C8 H15 N3 O3	201.111	1.452	100797	162016	106570	88432.5	164601	220510	201318	107115	83343.2	81424.7	104098	87093.4	213309	823029	439453	107793	254452
M_0664	Ethyl hydrogen (2-quinolinylmethyl)phosphonate	C12 H14 N O3 P	251.07	1.206	738600	577316	773615	39327.4	320714	822669	457678	406625	309494	305618	337336	331193	337064	57469.3	160668	114075	144374
M_0665	80122	C7 H13 N O	127.1	3.292	162716	365498	272411	233137	817206	162676	8927.09	153701	70136.1	143337	258823	23009.1	64477.2	67830.7	59006.5	80712.3	116667
M_0666	Acetic propanoic anhydride	C5 H8 O3	116.048	1.534	162895	295977	103593	57973.1	174672	161298	267356	615959	735394	93847.1	107195	44153.7	90375.9	16014.7	145207	141321	27123.1
M_0667	procodazole	C10 H10 N2 O2	190.074	1.24	423781	373140	431263	77557.5	533026	614444	445266	195972	111912	195072	168995	234210	208714	316591	590758	240037	816373
M_0668	(3alpha,5beta,7alpha,12alpha)-N,3,7,12-Tetrahydroxycholan-24-amide	C24 H41 N O5	423.298	8.489	182280	74270.7	177276	27677.5	4909.26	41734.8	5389.06	5849.37	14936.8	25873.3	182647	112788	13910.6	5039.55	4578.07	15449.9	815713
M_0669	Amide C18	C18 H37 N O	283.287	10.411	156464	193757	54967.4	67752.6	187694	809322	61031.3	149837	65078.1	351446	175844	27765.5	33286	59748.2	129214	121081	38121.3
M_0670	2-[(2-Cyclohexylethyl)amino]adenosine	C18 H28 N6 O4	392.217	8.252	141611	172835	221527	102372	145637	139265	260832	233064	229709	175697	149652	141955	120019	313107	445529	176723	290168
M_0671	4-Amino-3-hydroxybenzoic acid	C7 H7 N O3	153.04	2	309787	274338	265197	278344	277167	268731	704329	208431	181597	360655	279727	283450	314638	267382	324984	799452	462510
M_0672	Tretinoin	C20 H28 O2	300.209	8.945	221637	462526	163287	209581	206206	194718	299899	389080	338971	466742	196110	164133	234645	399407	798964	278724	601658
M_0673	1,1'-(1,2-Ethanediyl)bis(1-nitrosourea)	C4 H8 N6 O4	204.061	1.127	459905	574999	505820	615623	621702	744967	764076	668171	492435	628948	693494	642487	610075	750545	532029	654494	626587
M_0674	Ethyl lactate	C5 H10 O3	118.063	1.994	454196	795064	371604	552544	147287	353027	281274	164846	196567	411181	452289	217685	269474	523757	290575	290294	207349
M_0675	Desaminotyrosine	C9 H10 O3	166.063	7.773	22932.2	73197.5	68134.4	22177.9	135482	147852	215047	370905	105545	586808	792291	355838	90494.7	56438.2	48736	53892.3	8899.04
M_0676	3-hydroxyhexadecanoylcarnitine	C23 H45 N O5	415.33	8.187	318110	498141	219965	367503	259804	236893	417839	216551	330738	605974	680602	375917	483756	786402	162126	47635.3	398085
M_0677	Diethylol dimethyl hydantoin	C9 H16 N2 O4	216.111	2.395	3339.51	3217.59	4009.84	3188.36	1669.21	4156.64	3528.9	4123.87	2962.77	4229.38	4086.37	3500.58	2914.51	782144	109183	45675.8	251475
M_0678	[1,2,4]Triazolo[4,3-b][1,2,4,5]tetrazin-6-amine	C3 H3 N7	137.045	1.019	417.137	240679	462.806	388.901	1267.74	781778	486.687	701.023	261655	69433.6	456.246	345681	397112	319686	839.835	614418	915.148
M_0679	L-(-)-Asparagine	C4 H8 N2 O3	132.054	1.104	631403	545450	743795	536795	596400	718460	588277	651240	492044	343696	455024	583606	541219	357627	353308	591743	330545
M_0680	Ethyl L-gamma-glutamyl-L-cysteinate	C10 H18 N2 O5 S	278.094	2.608	120431	6507.51	105214	19583.3	209803	453931	139757	56508.7	96642.3	70549.9	30102.4	234867	105990	264964	95295.5	777905	550814
M_0681	Dimethyl-3,3'-dithiobispropionimidate	C8 H14 N2 O2 S2	234.049	0.975	658801	595324	776766	492055	287115	382690	280108	279986	306980	308507	316046	197513	272657	168347	297075	63374.5	320649
M_0682	3,4-Bis(hexyloxy)thiophene	C16 H28 O2 S	284.181	7.859	239445	516707	162022	328423	500650	110436	206001	215027	314125	501824	393013	164631	338367	478459	128852	141875	283278
M_0683	C10-HSL	C14 H25 N O3	255.183	9.043	288246	595354	341625	72217	765317	393987	628183	464873	552657	385299	402802	356923	403435	247679	280467	92841.3	359117
M_0684	N'-[(5-methoxy-3-nitro-6-oxo-1-cyclohexa-2,4-dienylidene)methyl]-2-(1,2,4-triazol-1-yl)acetohydrazide	C12 H12 N6 O5	320.087	7.685	14659	4621.83	17649.6	4176.51	9826.2	12025.4	4096.87	5665.97	17438.2	7857.56	4019.1	11588.4	3063.16	584279	688949	612583	444991
M_0685	5-cyanouracil	C5 H3 N3 O2	137.023	0.793	767137	519942	591005	745207	187463	401337	216684	155909	89589.1	173636	174490	175537	139632	664211	374561	285431	481415
M_0686	Boc-Phe(4-NO2)-OH	C14 H18 N2 O6	310.116	3.268	578488	520222	504500	291778	267629	343128	429607	200762	151403	135054	331337	455722	219077	332740	184305	411700	765199
M_0687	(Hydroxyethyl)methacrylate	C6 H10 O3	130.063	7.93	52608.1	253678	36984.9	24879	64025.8	141401	23635.2	325033	764820	124446	134380	90798.3	101168	136905	33710	32488.9	27831.7
M_0688	2,2'-[(6-Anilino-1,3,5-triazine-2,4-diyl)diimino]diethanol	C13 H18 N6 O2	290.149	8.513	66131.3	118178	52005.5	88854.2	268169	264645	145106	583375	532200	634714	155701	763756	97654.9	66134.1	103176	65549.2	53788.5
M_0689	Corticosterone	C21 H30 O4	346.214	8.297	215500	368992	231509	207541	345423	189994	397308	110849	123328	59402.5	65047	81526.4	232318	763495	27846.1	95358.5	369800
M_0690	Vigabatrin	C6 H11 N O2	129.079	1.334	380923	228157	418735	23147.7	93859.6	223027	596124	200630	152254	282668	327334	205383	304511	439775	583868	255656	225210
M_0691	1,3,6-Thiadiazepane-2,7-dithione	C4 H6 N2 S3	177.969	2.218	383407	265205	313732	514367	392249	350740	52794.6	644470	700072	268151	617716	759265	367694	85739.2	723932	121778	128584
M_0692	Melatonin	C13 H16 N2 O2	232.121	6.882	8000.15	9366.31	6700.94	7105.34	8382.88	7901.13	13113.5	6698.61	6469.37	5716.07	7412.04	6308.36	6763.49	6474.2	6988.48	8360.46	17119.3
M_0693	ACPC	C4 H7 N O2	101.048	1.383	247933	289315	196991	217263	119386	320117	248776	262901	394247	239745	350920	387246	213504	127848	291202	756170	449716
M_0694	N-Acetoxy-2-(3-nitro-4,5-dihydro-1H-pyrazol-1-yl)acetamide	C7 H10 N4 O5	230.065	1.919	119620	5780.25	68432.9	755690	4374.13	5235.32	8535.27	6243.75	7093.56	4654.64	6637.24	4975.38	6397.77	8212.02	5840.51	5307.74	5782.26
M_0695	(2E)-4,4,4-Trifluoro-2-butenal	C4 H3 F3 O	124.014	1.81	65908.6	93614.5	50061.2	86203.4	438848	188157	269160	215654	215561	220209	547220	261713	409970	537486	289139	462148	149638
M_0696	1-heptadecanoyl-sn-glycero-3-phosphocholine	C25 H52 N O7 P	509.349	10.608	432870	621621	455032	378346	751498	694395	467578	517790	494333	517876	271726	418546	275302	274449	338494	331058	307847
M_0697	LysoPC(20:5(5Z,8Z,11Z,14Z,17Z))	C28 H48 N O7 P	541.317	9.519	350959	384846	411468	145902	562001	433331	382961	469560	375392	402349	249999	193629	281890	24626.9	365102	234552	694070
M_0698	Gly-Lys	C8 H17 N3 O3	203.127	1.189	22241.3	20561.6	26202.4	22846.1	39627.9	27051.5	65915.8	22626.2	20475.2	25359.9	52457.4	23787.4	25284.4	744824	145377	303042	138933
M_0699	3-Oxalomalic acid	C6 H6 O8	206.007	1.08	743704	486286	544439	397098	315263	261005	286363	331869	405595	349711	436057	356819	348229	330971	270326	241178	315280
M_0700	1',3'-Dimethyl-1,4':5',1''-terimidazolidine-2,2',2''-trione	C11 H18 N6 O3	282.145	8.004	9024.23	10539.3	3031.07	364432	19191.8	8391.94	8770.55	13742.3	18290.1	8457.49	7462.31	8902.11	5349.08	8036.9	5500.85	4451.66	5069.42
M_0701	Icaridin	C12 H23 N O3	229.168	8.112	268905	288618	315877	310857	445810	742845	352447	214795	254429	414014	347838	306173	277947	204996	260391	176502	172529
M_0702	Butoxytriglycol	C10 H22 O4	206.152	7.431	225548	218874	297686	261312	526500	673355	296881	378421	303241	280426	406381	742748	128901	65590.7	39610.2	110426	93743.4
M_0703	Indole-3-acetic acid	C10 H9 N O2	175.063	1.545	259031	293442	561814	6694.42	649737	610468	458621	278772	211342	358844	347963	351577	377945	159693	424960	427243	371921
M_0704	(3S)-3-Methyl-5-[(1S,8aR)-2,5,5,8a-tetramethyl-4-oxo-1,4,4a,5,6,7,8,8a-octahydro-1-naphthalenyl]pentanoic acid	C20 H32 O3	320.234	9.219	181580	84616.1	41825.1	741711	33364.1	304845	597828	47055.3	42610.6	63822	51431.3	31497.8	38006.7	45149.5	380101	23622.4	697819
M_0705	4,15,21,32,37,48-Hexaoxa-1,18-diazabicyclo[16.16.16]pentacontane-5,14,22,31,38,47-hexone	C42 H72 N2 O12	796.512	10.68	12602.2	12730	738793	474921	458124	201866	265921	171345	477558	426088	293538	266317	321765	359783	250309	239017	195012
M_0706	1-Allyl-4-{(2,5-dimethoxyphenyl)[1-(tetrahydro-2-furanylmethyl)-1H-tetrazol-5-yl]methyl}piperazine	C22 H32 N6 O3	428.254	8.595	734498	4375.36	99639.6	22763.4	1118.88	34434.3	2368.64	7375.15	28041.6	48379.2	22375.7	46286.1	64628.9	78005.6	79808.6	660232	129617
M_0707	Hexadecyl N-[(allyloxy)carbonyl]alaninate	C23 H43 N O4	397.319	8.19	270909	454886	178214	313084	224156	185832	375478	195398	301305	553907	619235	341086	460667	734065	149386	45870.1	373364
M_0708	5,7-Dihydroxytryptamine	C10 H12 N2 O2	192.09	4.912	5639.53	5598.78	5422.74	5488.6	5378.58	5296.56	5356.84	5264.48	5259.29	5333.88	5449.36	5308.18	5451.74	5619.34	5377.44	5581.89	5498.92
M_0709	1,5-Dihydroimidazo[4,5-c][1,2,6]thiadiazin-4(3H)-one 2,2-dioxide	C4 H4 N4 O3 S	188	2.499	58336.6	67830.6	93567.9	47315.8	3088.74	86269	54411.3	46217.8	98940.9	65693.6	98168.8	43722.5	120793	733215	77255	71999.3	39468.9
M_0710	Eicosatetraynoic acid	C20 H24 O2	314.188	8.389	18158.6	17205.9	17859.5	17818.9	18328.7	16823	17147.8	17923.4	18240.3	17557.4	18299	17244.8	13284.7	731384	248327	360406	434670
M_0711	NI8720800	C11 H10 N2 O3 S	250.041	5.073	231263	153286	296331	100496	386697	552374	539973	269420	473663	520455	636120	672560	729586	99611	54904.9	24357.4	164244
M_0712	negamycin	C9 H20 N4 O4	248.148	1.261	15915.4	414985	347905	609635	6017.62	55736.5	8179.58	16984	5660.95	5983.89	5544.2	18257.3	15879.1	724760	7281.59	134254	116982
M_0713	Aceclidine	C9 H15 N O2	169.11	6.908	88644.6	79258.7	74514.4	109387	657718	378129	721299	97700.5	153861	240810	171455	134428	44548.2	98758.4	91881	139995	133990
M_0714	12-HHTrE	C17 H28 O3	280.203	8.863	28368.9	38660.1	33518.8	34957.6	51262	52410.8	58255.2	77661.8	57906	98890.6	100836	84021.4	25196.4	80339.1	256647	88259.2	720755
M_0715	Stearoyl glutamic acid	C23 H43 N O5	413.314	8.07	69345.3	175273	83739.7	121420	93601.1	66998.8	169574	118584	156927	224348	154728	116267	91139.7	715655	60114.3	41008.2	109930
M_0716	Boc-4-piperidone	C10 H17 N O3	199.121	7.97	21151.7	91004.9	13736.1	38011.1	12119.5	11430.8	21495.5	29906.3	18947.3	30269	34171.1	16249.6	18312.3	606222	505948	241369	500372
M_0717	3-Hydroxy-L-proline	C5 H9 N O3	131.058	1.792	105555	56171.4	18940	23920.1	102308	46919.4	108696	71456.4	21412.3	127052	64002.5	93132.5	106813	380369	184708	714898	182296
M_0718	Alphenal	C13 H12 N2 O3	244.085	3.77	714744	211901	295859	76085.1	2754.1	3911.26	5112.02	50004.1	129915	12533.6	9469.54	21151	10843.4	3270.82	2165.75	2309.44	2198.87
M_0719	4-Hydrazino-6-methoxy-1-(piperazin-1-ylmethyl)phthalazine	C14 H20 N6 O	288.17	8.95	356560	600947	447238	687659	458605	659493	329421	508039	632356	416129	407454	540893	357543	432898	312365	678575	641592
M_0720	Azanidazole	C10 H10 N6 O2	246.087	8.141	114012	142264	102133	107785	165434	173745	272964	155748	93671.3	296760	176865	234168	118426	619668	322111	294905	432123
M_0721	16-Heptadecyne-1,2,4-triol	C17 H32 O3	306.217	8.956	491994	710777	540683	503009	440647	341444	391556	395768	664288	694709	366818	396806	360781	492272	419670	460217	169336
M_0722	(9aR,9bS)-9a-Hydroxy-6,9-dimethyl-3-methylene-3,3a,4,5,9a,9b-hexahydroazuleno[4,5-b]furan-2,7-dione	C15 H16 O4	238.12	8.187	261889	324640	218049	570655	550299	602532	462218	680484	620894	709550	694965	633144	351313	260063	219754	244413	488576
M_0723	cealysin	C6 H12 N6 O3	216.097	3.032	205866	414105	302830	387155	219651	309961	327298	510358	414153	375724	295204	535232	184994	293558	278802	304172	186952
M_0724	hodgkinsine	C33 H38 N6	518.318	9.59	8344.19	8215.32	6051.74	427363	5806.26	5714.74	5388.75	213278	5664.81	5556.51	5307.16	108118	106340	20240.1	5348	5216.54	6258.32
M_0725	Trigonelline	C7 H7 N O2	137.048	5.129	4126.74	19202.4	23530.9	18282.6	25480.7	10162.5	17676.8	27234.2	3874.6	3878.54	25558.6	25871.5	6390.9	705948	239950	153273	63453.4
M_0726	L-Aspartic acid β-benzyl ester	C11 H13 N O4	245.066	4.828	27799.4	17619.1	42398.8	31764.3	14858.5	32978.5	22801.1	15327	15026.3	3544.52	9980.25	11983.8	8281.81	700114	30803.9	41254	55782.1
M_0727	Methyl palmitate	C17 H34 O2	255.256	7.693	119976	192032	130306	143382	425830	124467	698033	493236	130235	222562	318762	263493	182270	178476	68293.6	144388	137675
M_0728	N-Desmethyltramadol	C15 H23 N O2	232.144	8.316	407398	395297	468142	264720	372624	688741	349234	355322	322199	244170	362488	394747	234921	194322	206542	264511	222764
M_0729	Gramine	C11 H14 N2	129.058	7.817	620307	481156	693056	413086	286525	496395	534701	221380	109896	422583	455434	606631	405249	222921	538346	231642	671685
M_0730	YQ3683000	C11 H18 O2	182.131	7.843	29685.1	40434	49417.9	49751.9	58876.1	476519	322408	346777	56832.2	310938	197306	690886	169286	22180.1	9321.61	11667.7	173592
M_0731	Methyl palmitate	C17 H34 O2	287.282	7.707	117311	184197	123602	136991	418606	115778	690188	487460	123220	215171	92096.3	255464	48228.3	72809.4	62982.8	141172	31358.4
M_0732	4-Aminobenzoic acid	C7 H7 N O2	137.048	6.219	10533.8	6942.69	8115.42	8088.64	7103.28	5357.66	8831.51	952.597	5904.68	6642.31	7736.92	9686.47	8041.68	10243.4	6017.38	7035.31	9794.09
M_0733	1,7-Dimethylguanosine	C12 H19 N5 O5	313.138	2.258	19403.6	112364	102285	97871.6	131052	78908	208466	689175	269931	284811	402411	267423	202782	22519.4	175976	99915.5	209377
M_0734	Trihexyphenidyl	C20 H31 N O	301.238	9.626	41774.7	26040.8	3384.12	3446.2	208534	682551	129063	20418.3	3817.4	111049	45301.7	3202.01	2796.73	2976.34	18168.1	31923.3	7931.72
M_0735	(3S)-3-{(2S,3R,5S)-5-[(2R)-3-{(2S,4aS,5aR,6R,6aS,7aR,8R,9Z,11aS,12aR,13aS,14aR,17S,18R,19aS,20aR,21aS,23aR,24aS,25aR,26aS,27aR)-6,17-Dihydroxy-2-[(2E,4R)-5-hydroxy-2,4-dimethyl-2-penten-1-yl]-6a,8,12a ,13a,17,27a-hexamethyl-3-methylene-2,3,4,4a,5a,6,6a,7a,8,11,11a,12a,13,13a,14a,15,16,17,18,19a,20,20a,21a,22,23,23a,24a,25,25a,26a,27,27a-dotriacontahydrooxepino[2''',3''':5'',6'']pyrano[2'',3'':5',…	C60 H94 O16	1070.66	8.853	90985.5	94724.5	106662	537044	17292.9	48544.5	66319.2	205650	678520	244276	148710	236893	141559	25870.9	186774	37943.8	139717
M_0736	OZ4400000	C10 H14 O4	198.089	7.728	8953.48	19356.8	108867	10570.3	116734	87714.1	94986.1	194456	76698.9	107844	676613	239703	95868.6	86390.1	6870.98	69728.2	5773.15
M_0737	2-Oxindole	C8 H7 N O	133.053	5.098	84924.9	75847.6	78885.3	35659.9	37262.8	134090	112159	34270.5	34872.3	77903.1	264387	220117	141382	175753	129518	81676.3	676203
M_0738	Arachidonic acid	C20 H32 O2	304.24	10.049	346289	676121	287643	190261	471059	399345	426737	521164	600269	617348	344727	309718	413950	249916	180851	276179	322521
M_0739	Ethyl 4-fluoro-3-nitrobenzoate	C9 H8 F N O4	213.044	1.118	526515	58815.2	229975	188401	391269	531191	253638	674359	487013	300751	504591	267042	326377	120530	94754.6	52740.1	59792.7
M_0740	(9aR,9bS)-9a-Hydroxy-6,9-dimethyl-3-methylene-3,3a,4,5,9a,9b-hexahydroazuleno[4,5-b]furan-2,7-dione	C15 H16 O4	260.102	8.188	255627	317045	209255	555363	475278	525144	372292	588364	528418	646271	672340	593630	314971	182424	185272	67630.7	320248
M_0741	L-(-)-Asparagine	C4 H8 N2 O3	132.054	1.348	434595	374339	592167	625055	254350	579191	578080	285684	192111	184162	669030	173882	490769	230634	622304	337648	590418
M_0742	2,2,4-Trimethyl-1,3-pentadienol diisobutyrate	C16 H30 O4	303.241	9.228	436821	473505	395327	490483	442808	668936	311397	360796	485069	461892	321734	620634	233798	368607	224272	362181	553876
M_0743	Glycidyl Stearate	C21 H40 O3	340.298	10.312	201091	564180	334324	160306	404150	280174	296840	667627	524391	451022	456015	536812	507694	127449	518283	99286.7	311909
M_0744	1H-Inden-1-ylidene	C9 H6	114.047	3.496	278668	328159	409230	232105	468717	507822	391223	318936	405950	350014	322159	426225	401165	272412	315266	405400	505667
M_0745	Metalaxyl	C15 H21 N O4	279.147	3.304	133390	172077	160662	99304.3	43555.1	114678	173778	117556	85643.6	67396.1	166487	173216	190756	572452	147774	665732	259692
M_0746	Triethanolamine	C6 H15 N O3	149.105	0.965	18664.1	19160.7	20265.2	20407.9	12934.9	20488.4	21211.4	20372.4	20346.3	20300.9	21280.6	21807.5	21570.1	21814	21053.8	21946.4	20428
M_0747	LysoPC(20:5(5Z,8Z,11Z,14Z,17Z))	C28 H48 N O7 P	541.315	10.129	463321	501312	356495	187375	312465	177623	224384	399126	301163	410802	219011	284649	254524	64572.7	252954	179412	305354
M_0748	MTIC	C5 H8 N6 O	168.076	5.003	26502.2	2648.28	1795.7	662704	5003.14	6990.17	4673.24	8876.21	11130.1	1670.26	2165.02	10255.7	9564.31	1801.78	4651.48	1689.31	1835.66
M_0749	Phosphocholine	C5 H14 N O4 P	183.066	1.122	199615	656960	260447	259994	139793	154360	272210	245568	168394	136331	248477	51241.3	122781	114847	209046	47203.9	85734.5
M_0750	Lauramide	C12 H25 N O	199.194	8.934	256765	229854	278938	161130	213211	493674	210613	460409	153131	233120	266157	376314	117376	125097	240838	254364	172180
M_0751	leucoline	C9 H7 N	129.058	3.501	176834	241469	320260	264409	443715	493044	565131	653549	437147	594238	568922	501491	543697	284508	444638	341174	310755
M_0752	dimethyl-L-arginine	C8 H18 N4 O2	202.143	1.229	14554.7	17856.9	44676.9	51839.1	19910.2	5612.57	14585.1	12875	12353.9	13556.1	12557.8	14942.6	13014.1	93470.6	15525.3	652921	17929.4
M_0753	4149853	C21 H41 N O4	371.304	8.13	250735	408553	199570	287744	189974	135027	252720	173962	179478	348739	462624	220914	219110	652448	161172	78773.9	262266
M_0754	S-(2-Methyl-2-propanyl) 2-(2-methyl-3-oxocyclohexyl)propanethioate	C14 H24 O2 S	256.15	7.618	208636	575865	156219	255325	550448	107166	301701	244308	332768	651774	496795	155695	387302	463219	133375	75331.9	293728
M_0755	Pro-Leu	C11 H20 N2 O3	228.147	1.478	199431	361276	204590	378954	109269	181704	59868	109535	25696.3	117827	109902	62973.1	167750	650827	406721	142729	365475
M_0756	OZ4400000	C10 H14 O4	198.089	7.627	3503.42	42120.5	3566.71	40513	8565.41	47328	3531.36	194456	650817	33380	129470	29105.4	32719	35503.3	2078.71	5426.24	2058.08
M_0757	4-Aminobenzoic acid	C7 H7 N O2	137.048	1.247	7881.05	5658.4	26259.9	44714.5	11605.6	22884.8	21795	13495.1	5035.63	11648.5	13290.4	11027.7	14104.3	647595	27798.4	518060	33659.8
M_0758	N~4~-(1,3-Dimethyl-1H-pyrazolo[3,4-b]quinolin-4-yl)-N~1~,N~1~-diethyl-1,4-pentanediamine	C21 H31 N5	353.256	8.877	36729.3	343934	646352	166977	22297.6	368719	47702.2	22402.5	4469.43	41100.3	369952	423806	125748	140038	98573.7	84334.6	139404
M_0759	Propofol	C12 H18 O	178.136	8.948	108128	25992.9	81101.4	646198	24980.4	20550.7	21721.2	7506.13	20378.3	4468.36	29244.2	6921.49	25974.3	22075.4	5298.64	20312	19451.5
M_0760	Dihydrothymine	C5 H8 N2 O2	128.059	1.102	340399	404594	329310	327628	445793	390732	488397	466582	464469	413491	553867	566435	502814	645529	471215	413942	494829
M_0761	OB4520000	C10 H9 N O	159.069	7.91	2621.83	2688.52	2864.12	2839.92	2402.38	2408.03	1268.54	2688.71	3734.13	1355.65	2430.24	2495.22	1909.85	1132.2	2023.15	1777.85	6826.95
M_0762	Bohemine	C18 H24 N6 O	340.201	9.13	58471.5	153508	42610.5	252850	78986.8	50423.4	64626.7	58464.1	74049.8	42576.7	34199.3	37931.5	49387.7	287986	640405	134861	334866
M_0763	Andrographolide	C20 H30 O5	332.196	8.938	96044.8	153679	161424	580002	187406	181972	206890	48961.6	161729	149426	137674	42790.3	244113	640262	136459	203647	197759
M_0764	N-Arachidonoyl taurine	C22 H37 N O4 S	411.25	8.529	526780	555760	481625	475010	488587	546868	452212	536361	530011	597143	550288	605947	445976	321258	346788	497810	469667
M_0765	Laurixamine	C15 H33 N O	243.256	7.757	21047.3	25246.1	36410.4	3231.49	32001.1	16771.8	42654.9	3624.99	5398.84	31022.2	19945.6	15263.3	3096.58	15008.9	8215.56	3423.96	7827.4
M_0766	tert-Butyl hydrazodiformate	C10 H20 N2 O4	232.142	1.922	635165	11516.8	148799	218603	2819.46	3352.01	3360.26	2990.74	2963.69	3041.97	3243.5	3169.88	3157.86	5634.72	3548.05	3535.46	3946.64
M_0767	(Dodecylsulfonyl)acetonitrile	C14 H27 N O2 S	273.176	7.619	202412	552157	152714	252123	538171	107655	294472	239820	339849	634543	486380	158221	376779	458882	132848	73090	287664
M_0768	5-Indolol	C8 H7 N O	133.053	8.521	60540.7	166966	100009	51839	95070.5	109573	322439	59557.3	55460.6	77836.1	125083	271291	175046	634046	377650	455033	409451
M_0769	SSR161421	C25 H20 N4 O2	408.155	8.325	572540	532734	540149	296263	510519	582322	526600	426508	630203	525432	465010	532579	231317	330217	203405	299229	147979
M_0770	Leu-Leu	C12 H24 N2 O3	244.179	3.947	628817	204639	118037	128295	1870.36	1970.18	1897.25	3007.04	17352.7	1974.27	5486.59	3314.3	1953.61	2019.28	818.58	3061.31	3817.23
M_0771	N4-(2,2-DIMETHYL-1-METHYLCARBAMOYL-PROPYL)-2,N1-DIHYDROXY-3-ISOBUTYL-SUCCINAMIDE	C15 H29 N3 O5	331.211	2.415	628052	6252.18	186316	472101	6777.21	8441.65	7207.8	5872.68	5119.25	5826.07	4875.18	6768.98	5609.44	11705.6	7083.24	11009.8	7654.87
M_0772	(4Z)-4-[Nitroso(1H-triaziren-1-yl)methylene]-4,5-dihydro-1,2,5-oxadiazol-3-amine	C3 H3 N7 O2	169.035	1.101	435154	627050	466223	397983	261515	271158	404177	506687	297382	322124	443733	267881	357171	209937	428711	118234	232968
M_0773	1099281	C9 H6 O	130.042	7.498	428820	254558	624419	280208	230017	265642	232233	54922.5	35623.6	144600	166861	165388	150885	26281	16790.9	19093.7	120564
M_0774	benzyne	C6 H4	76.0315	3.496	241797	421669	408852	261317	471125	513845	355325	356628	449787	408604	326085	356412	378399	233298	326133	357644	462944
M_0775	ACETYL PROLINE	C7 H11 N O3	157.074	4.242	84946.9	118507	222110	168049	29286.8	106397	77971	35184.5	23017.4	83560.4	98727.7	41228.1	127630	620295	31471.2	35672.8	57982.4
M_0776	6-Methylindole	C9 H9 N	131.074	3.494	258208	296833	368030	204381	417006	468649	353697	317143	403056	347436	309718	393402	355772	248615	304406	371967	452662
M_0777	Acetic propanoic anhydride	C5 H8 O3	116.048	1.245	311029	146563	219156	189057	214277	223493	322737	615090	425360	152729	284280	412381	168051	30384.8	69186.8	590606	25550
M_0778	11343172	C11 H21 N O3	215.152	7.887	155848	145374	147572	194247	449712	614969	488097	182807	154627	336764	229473	168490	154829	110896	95829.3	88641.7	104470
M_0779	all-trans-retinal	C20 H28 O	284.214	9.503	338325	614120	289772	240063	67243.6	76218.7	160615	44055.5	333413	441235	99286.3	84163.4	113523	287765	71745.3	58921.7	125574
M_0780	6-Methoxyquinaldine	C11 H11 N O	173.084	7.459	4999.07	5860.59	5004.03	41442.9	6020.62	5691.82	4876.39	5621.48	4472.34	5248.82	7805.95	4855.71	3499.19	3821.46	2869.32	3232.32	4305.26
M_0781	1-Allyl 2-tetradecyl 1,2-pyrrolidinedicarboxylate	C23 H41 N O4	395.304	8.08	45111.4	130031	61740.7	90304.4	67103.4	48636.2	116622	82439.3	117006	160191	119669	84674.1	74365.3	612442	57918.6	38987.9	96995.7
M_0782	4129939	C5 H11 N O3 S	165.046	1.114	349036	250606	454919	610682	352259	436600	444527	383624	204070	87043.7	191468	532136	213592	164623	179611	107669	122236
M_0783	Creatinine	C4 H7 N3 O	113.059	1.226	60504.9	418446	178194	121138	147032	203823	193950	251770	55566.9	130234	186063	141936	224953	610479	358507	452675	318851
M_0784	N-{3-[Acetyl(2-cyanoethyl)amino]propyl}-N-[3-(13-oxoazacyclotridecan-2-yl)propyl]acetamide	C25 H44 N4 O3	448.341	8.441	325732	610108	497379	545845	480958	366313	341973	307325	388650	430284	308448	483386	300716	359121	109838	264045	164175
M_0785	(2,6-Diethyltetrahydro[1,3,2]dioxaborolo[4,5-e][1,3,2]dioxaborepin-4-yl)methanol	C9 H18 B2 O5	228.135	7.444	58703.1	20749.9	23684.9	213417	176077	607064	67697.2	23609.8	57834.7	74519.1	137919	102606	7168.09	55446.5	30748.5	5108.53	14815.2
M_0786	2,3-Dihydroxypropyl 3-sulfanylpropanoate	C6 H12 O4 S	180.046	1.586	199885	606858	311929	295269	219147	181716	113587	185979	202096	245124	152637	124926	175623	96223.6	126100	118667	97038.9
M_0787	N-[5-(1H-Benzimidazol-2-yl)-1,3-thiazol-2-yl]formamide	C11 H8 N4 O S	244.043	2.508	87113.9	75458.3	64498.6	48768.6	52070	69081	67617.6	46480.8	84379.9	81996.7	99993.1	67494.8	88929.9	600955	92258.7	72941.2	58116.2
M_0788	FZ5600000	C27 H44	368.344	8.991	1288.09	10926	2086.57	19876.3	20304.8	13960.6	11952.1	8869.32	36332.2	10381	32804.2	17041.3	4674.12	1500.29	28034.2	1469.48	18388.8
M_0789	2-(Bis(2-hydroxyethyl)amino)ethyl laurate	C18 H37 N O4	331.272	8.72	587640	45172.2	101197	70457.1	262677	182466	226493	119335	229002	153758	221225	116977	206440	168457	147794	111109	90620.2
M_0790	6-Methylquinoline	C10 H9 N	143.074	3.495	233154	378432	415049	209256	423081	413694	304381	307983	380331	323765	289862	379395	407987	216851	204931	306065	441490
M_0791	BOC-ARG-OH	C11 H22 N4 O4	274.164	1.258	84762.2	404315	584340	386439	22970.8	87027.9	36228.3	40487.8	30967	12097.4	17787.2	23214.5	42727	189057	18210.1	17313	28514.8
M_0792	2-Methyl-4-isothiazolin-3-one	C4 H5 N O S	115.01	2.583	4719.64	4444.66	6379.8	6766.42	4562.51	5571.61	4523.36	3916.93	4049.22	4442.89	3758.24	4789.93	4348.13	7229.17	4881.79	6053.33	4860.1
M_0793	1,2-Dioxin	C4 H4 O2	84.0214	1.131	393839	208210	222398	579495	373361	309662	205149	331120	381998	152729	423998	278754	228610	18174.7	69186.8	208170	42665.2
M_0794	Acetic propanoic anhydride	C5 H8 O3	116.048	1.143	393839	208210	222398	579495	373361	309662	205149	331120	381998	152729	423998	278754	228610	18174.7	69186.8	208170	42665.2
M_0795	Pro-Leu	C11 H20 N2 O3	228.147	1.139	140833	455689	124281	220283	87855	82574.9	132408	253851	152527	107450	172053	53552.5	146062	576065	210712	179746	220820
M_0796	fMet	C6 H11 N O3 S	177.046	3.377	49565.6	51700.1	10092.8	92203.8	104122	96833.1	75016.9	82761.3	65937.4	120030	202606	85021.8	113426	575593	150142	127408	191371
M_0797	Rabenzazole	C12 H12 N4	212.102	7.669	149864	4002.21	197943	145389	63565.5	59888.3	31320.7	1929.33	1978.62	90650.8	157509	31116.3	18303.8	16816.2	107337	61687.3	399872
M_0798	1-O-palmitoyl-2-O-(5-oxovaleryl)-sn-glycero-3-phosphocholine	C29 H56 N O9 P	593.37	9.976	57141.2	17409.3	50549.7	574915	1686.41	4055.77	6308.59	9114.95	30425.8	3007.27	8452.25	16806.4	10394.1	2330.17	7684.97	2728.59	2594.1
M_0799	1099281	C9 H6 O	130.042	2.446	344884	278516	492673	302536	354511	509262	392914	287654	229357	258552	289082	306228	276250	573350	368751	453532	337978
M_0800	Cafestol	C20 H28 O3	316.203	8.913	69980	155887	65481.8	221407	16623.5	30410.5	76099.4	119139	347164	141577	88400.4	39625.5	45940.3	553288	393644	327262	572222
M_0801	CU5250000	C8 H5 N O	131.037	4.601	570996	221019	513481	404288	143293	222613	194247	90490.6	82346.5	164511	212736	240852	161484	47948.1	30927.6	75464.1	144411
M_0802	A-134U	C8 H12 N6 O2	224.102	6.972	136268	175776	108735	115529	129780	291934	154203	142249	71147.9	204523	433920	145035	122595	567670	217313	445329	372856
M_0803	TBHQ	C10 H14 O2	166.1	7.83	99104.1	193780	36633.3	107785	184060	254803	296949	227451	359042	565077	384232	261458	162626	35116.9	245805	233724	252257
M_0804	1-Hydroxycyclohexyl Phenyl Ketone	C13 H16 O2	204.115	8.452	83806.3	104816	41670.9	112743	72033.1	30070.8	125306	50526.8	166275	103049	101309	60277.2	60955.6	564477	124166	71325.9	154901
M_0805	(2E)-4,4,4-Trifluoro-2-butenal	C4 H3 F3 O	124.014	1.885	65908.6	93614.5	61016.9	86203.4	438848	188157	269160	215654	215561	220209	547220	261713	409970	254983	289139	462148	149638
M_0806	TFMAA	C4 H3 F3 O2	140.009	1.967	220072	251281	469207	198596	209969	448624	561081	122898	82789.9	294044	250736	256825	392516	78994.5	69674.8	29152.1	231777
M_0807	Cyclohexylamine	C6 H13 N	99.1053	1.218	31172.6	9674.53	559990	33848.2	13989	10643.4	13333.8	8746.01	8087.97	9309.79	9278.47	9905.39	8840.51	13095.7	10670.2	11124.8	5669.56
M_0808	1-(4,6-Dimethyl-2-pyrimidinyl)-3-[3-(2-oxo-1-pyrrolidinyl)propyl]guanidine	C14 H22 N6 O	290.186	8.818	196261	107423	107605	559711	181989	361875	75658	94872.4	136020	88583.6	83071.9	120444	124221	40731.5	54685.7	71004.4	119353
M_0809	RZ2670000	C10 H22 O6	238.142	3.857	194104	423501	271203	289484	139057	148805	259699	239904	558576	253498	216518	253692	168464	172201	184074	216822	295558
M_0810	L-(+)-Citrulline	C6 H13 N3 O3	197.078	1.312	63523.8	100253	155484	23283	48741.9	136547	149499	79837.1	16675.5	122919	60116.2	69158.4	15333.4	228772	308983	281333	555804
M_0811	N-Benzoyl-DL-alanine	C10 H11 N O3	193.074	6.501	14002.9	9703.78	25067.1	14462.5	16371.6	20015.8	22820.9	6629.7	11062.1	7346.07	12202.5	19651.7	19587.6	555768	46934.2	192390	115870
M_0812	2,3,4,9-Tetrahydro-1H-β-carboline-3-carboxylic acid	C12 H12 N2 O2	216.09	4.515	426430	330755	364049	189355	418695	555246	535873	214325	103649	183744	220528	470643	289668	194869	223903	257465	211118
M_0813	DL-Arginine	C6 H14 N4 O2	174.112	1.387	200508	553914	391802	304910	496480	65161.7	155564	119243	45455.4	61131.1	35974.6	186881	147076	22911	110625	23968.7	115474
M_0814	N-[3-(3,5-Dimethyl-1H-pyrazol-1-yl)-5-ethyl-4H-1,2,4-triazol-4-yl]acetamide	C11 H16 N6 O	248.139	8.588	413992	352415	316244	378426	553699	388688	348530	407101	371534	397612	409822	435924	298107	271016	211655	271496	272133
M_0815	Gramine	C11 H14 N2	129.058	7.474	26066.1	17345.4	48903.9	9471.58	57981.1	88187.7	50534	16940.9	18399.5	51235.6	55211.7	109649	29972.6	45043.5	34977.7	48459.6	51110.5
M_0816	Isophorone	C9 H14 O	138.105	7.817	300732	36986	32537.9	37377.6	552380	225338	226331	142906	138238	513392	443721	513764	398808	15625.3	176133	161134	235304
M_0817	1-Methyladamantane	C11 H18	150.141	8.663	396999	291114	395502	305976	298392	333494	354790	316062	371371	549740	428822	275538	288454	308810	249928	337730	158483
M_0818	trilinoleoyl 2-monolysocardiolipin	C63 H112 O16 P2	1186.74	9.99	49744.8	14604.3	49772.1	548599	12186.4	6172.79	790.656	9114.95	25225.2	4416.17	13352.6	19558.6	6106.41	3566.38	12011.7	4152.85	3948.16
M_0819	Resorufin	C12 H7 N O3	213.04	6.325	546190	183594	180009	79897.6	88730.9	428763	192768	52229.7	209186	127915	371056	309785	331708	137324	162754	221725	369504
M_0820	1,3-Dinitro-1,2,3,4-tetrahydro-1,3,5-triazine	C3 H5 N5 O4	175.033	1.074	202257	486435	308867	349182	373580	364966	419481	520572	310356	309822	348150	375995	406120	546016	201312	251857	264359
M_0821	pyrrolizidine	C7 H13 N	111.105	0.812	314480	400514	333531	545672	104449	137995	77009	70524.8	47309.9	51574.1	100434	66457.2	75183.6	123106	97380.2	69273.3	65967.4
M_0822	4-Aminobenzoic acid	C7 H7 N O2	137.048	6.252	7303.1	5218.01	9020.37	7341.12	5192.59	5978.61	6892.64	5908.36	5565.32	4244.75	6385.79	6730.91	8751.16	7636.83	5879.19	7184.51	6459.65
M_0823	3-AB	C7 H8 N2 O	136.064	1.042	3585.52	2243.39	38387	44289.7	76375.7	2706.54	6353.42	134476	11987.9	59328	1829.58	2084.67	62145.2	544204	74512.5	6500.52	4963.83
M_0824	Chromic acid	H2 Cr O4	117.935	0.652	291138	297146	196233	203930	67707.3	44740.8	194599	41572	49847.1	39102.9	169455	170128	69037.6	194055	179647	65153.9	192168
M_0825	Tamsulosin	C20 H28 N2 O5 S	408.167	8.604	341364	296143	540221	211216	128460	161791	160491	139876	213144	183607	168345	221253	157200	121205	162278	123913	163077
M_0826	Cimaterol	C12 H17 N3 O	219.137	6.109	1046.87	991.515	1000.83	1047.03	1016.73	1017.26	1017.41	1004.86	1044.9	908.972	1017.87	1012.9	1021.61	1039.54	1004.28	1032.18	1033.15
M_0827	1-[(2-Hydroxyethoxy)methyl]-5-methyl-2,4(1H,3H)-pyrimidinedione	C8 H12 N2 O4	200.08	1.559	9521.72	8176.27	15135.6	8852.7	9776.47	13911.2	11114.3	9843.68	8083.15	6912.44	10600.5	10904.4	9975.89	537697	34883.1	7369.65	31040.9
M_0828	Arachidonic acid	C20 H32 O2	304.24	9.173	204090	253320	163551	221087	132524	137483	263113	224313	135007	445754	137563	111746	158946	308225	537036	99912	468657
M_0829	1,1-Dimethyl-3-(2H-tetrazol-5-yl)urea	C4 H8 N6 O	156.076	3.892	142052	167914	172777	193331	536672	281293	124777	180350	216959	170386	181535	188439	163683	66531.7	64379.5	105339	132560
M_0830	6132055	C19 H36 O3	312.266	9.85	506443	352222	377299	533547	254387	191146	278863	335673	344008	236692	345024	318176	231684	449563	321597	415275	229430
M_0831	Nonylthiol	C9 H20 S	160.129	1.101	146926	71057.5	117556	124683	75967.2	186834	87642.1	123962	57981.6	292835	533143	124136	89096.6	40247.4	20714.5	28723.9	71004.1
M_0832	Aminomethyl dihydrogen phosphate	C H6 N O4 P	127.004	1.071	532367	231610	450640	288298	142624	197027	134289	178693	113621	108470	121310	150582	116263	54503.4	86279.5	212138	81307.7
M_0833	5-(2-phenyl-4-triazolyl)-2H-tetrazole	C9 H7 N7	213.077	7.457	2749.09	6130.58	4517.53	41709.7	2472.57	4443.54	2551.72	3124.18	4727.7	3846.75	2674.04	2575.74	1815.68	2145.36	1610.83	2833.09	2001.48
M_0834	1-Allyl 2-dodecyl 1,2-pyrrolidinedicarboxylate	C21 H37 N O4	367.272	7.899	90331.1	274259	106520	121527	149369	105923	227196	174602	229256	333649	247596	131795	179305	531859	82436.2	54918.6	147478
M_0835	5-(1-Phenyl-1H-tetrazol-5-yl)-1,3,4-oxadiazol-2-amine	C9 H7 N7 O	229.071	7.159	108764	65568.9	175301	140640	190090	179440	237535	148471	90538.7	75610.4	62690.9	111267	16141	411221	260289	530509	211508
M_0836	2-Benzylthiophene	C11 H10 S	174.05	1.131	109566	148097	124806	122064	153668	169614	216793	152271	101257	155122	213547	137813	137473	529858	391990	263535	362226
M_0837	tranexamic acid	C8 H15 N O2	157.11	1.225	311121	260967	258505	219955	253253	145444	222456	204508	321739	249589	76446.4	346405	234519	285962	373699	258011	410293
M_0838	Trigonelline	C7 H7 N O2	137.048	1.51	51151.4	79430.2	74435.4	97656.1	65266	52042.3	90801.3	33283.6	19026.4	34792.9	34608.1	66656.8	79729.1	411777	528662	303485	278444
M_0839	Aceturic acid	C4 H7 N O3	117.043	1.424	181150	526239	166482	293031	210444	111588	204140	171717	189942	246408	305399	157353	307023	180779	110924	172706	194401
M_0840	2127	C7 H6 O	106.042	2.444	279918	234358	400645	226947	345203	397997	337616	228462	197249	210213	180880	297469	217768	525066	336078	505688	323347
M_0841	AJ3278000	C2 H5 O5 P	139.988	1.434	256453	524461	233836	264135	110789	268842	341045	260551	220795	333504	305791	342236	296870	129508	271724	30702.5	135316
M_0842	2-(14,15-Epoxyeicosatrienoyl) glycerol	C23 H38 O5	416.254	8.372	25685.9	23528.3	27219.4	21677.8	5146.25	5384.2	5014.89	1468.54	4715.72	11138.8	17751.9	79390.4	7369.37	84856.4	12071.4	86108.3	523325
M_0843	9-(2-Azido-2,3-dideoxypentofuranosyl)-9H-purin-6-amine	C10 H12 N8 O2	276.108	1.161	62904.5	45791.5	62333.4	67900.6	46416.6	133759	147428	92526.7	32614.8	74410.6	18982.4	150034	42055	492080	520060	509075	395408
M_0844	Glycerol 3-phosphate	C3 H9 O6 P	172.014	1.418	254731	517457	231418	262977	109795	267559	339798	256550	219367	332425	303640	341147	295703	127207	270395	29500.7	134037
M_0845	Osthol	C15 H16 O3	244.11	8.329	322098	517087	367648	328650	92052.7	110337	148367	140593	91642.8	155900	168509	85960.2	83286.4	7069.77	14810.8	11230.7	46891.2
M_0846	2-Arachidonoyl glycerol	C23 H38 O4	356.292	9.981	34666.1	178886	77534.9	49555	300101	103039	305263	250224	164528	283288	185710	185067	185192	37572.4	337394	168235	104138
M_0847	Creatine	C4 H9 N3 O2	131.071	7.468	3287.06	3089.74	3410.6	3247.82	3081.28	3159.46	3323.6	3118.13	3048.22	3001.37	3190.75	3309.5	2384.94	2604.59	1955.64	1856.14	2429.91
M_0848	D-(+)-Pyroglutamic Acid	C5 H7 N O3	129.043	2.13	23120.6	350827	51481.4	148255	119469	183791	201478	64273.8	49091.7	148645	111292	172940	160120	514192	64138.4	97052.4	88818.9
M_0849	1-Methyl-4-nitro-1H-imidazole-5-sulfonamide	C4 H6 N4 O4 S	206.01	2.504	12447.6	11837.8	24334.2	11405.6	12831.9	31837.1	30795.3	29126.9	75584.9	48150	82041.7	54931.1	66253.2	513441	72399.8	58469.2	46631.1
M_0850	GX1529000	C7 H15 N	113.121	5.119	199757	216484	252825	213946	442549	461275	304730	306639	272064	290402	353370	480088	512804	216985	170879	168879	193039
M_0851	(1,4,8,11-Tetraazacyclotetradecan-1-ylmethyl)phosphonic acid	C11 H27 N4 O3 P	294.183	9.147	5875.96	424222	5051.05	5426.9	207770	4931.79	5092.62	5225.14	5392.75	250793	5046.02	4876.69	4037.1	6779.86	6669.65	5835.17	7678.51
M_0852	negamycin	C9 H20 N4 O4	248.148	1.452	206960	356717	360531	512368	19101.9	296484	17056.7	212688	241299	9816.02	236299	13144.2	233791	26108	214943	33332.5	36972.4
M_0853	Nitrosobis(2-oxopropyl)amine	C6 H10 N2 O3	158.069	1.139	320697	254853	292984	211459	196694	179960	240714	242249	233771	236800	206461	235992	230007	499811	290806	177531	323459
M_0854	Andrographolide	C20 H30 O5	332.196	8.757	61594.4	94744.6	46286.4	510324	60119	58053	56803.1	28988	41498.6	80958.2	19087.2	9456.68	8580.69	74078.8	21440.2	46102.7	56748.2
M_0855	cealysin	C6 H12 N6 O3	216.097	2.929	110146	30755.1	115467	53609.5	60392	33385.8	62368.3	110379	76733.1	375724	295204	58685.8	57940.2	52554.1	57469.1	304172	186952
M_0856	IpA	C11 H11 N O2	189.079	1.534	150266	157788	236029	8297.43	337648	289103	285518	126558	88566.4	190602	198750	201957	195246	218797	339540	267827	449234
M_0857	8-Azaguanine	C4 H4 N6 O	152.045	3.966	253349	193109	237264	260874	461074	211888	392686	196543	398599	204793	202856	498268	250466	213964	173232	266067	258617
M_0858	Sulcatol	C8 H16 O	128.12	8.614	172622	133972	165941	163959	168833	246340	133813	159029	165202	182250	267133	233892	128705	135412	133664	183881	451941
M_0859	Diaveridine	C13 H16 N4 O2	260.123	3.844	160654	356546	207049	257675	122082	128483	236544	115138	508660	208020	171958	206273	142948	139505	159646	177886	274861
M_0860	dimethyl-L-arginine	C8 H18 N4 O2	202.143	1.084	132576	210512	132148	121177	104532	83567.5	159985	138599	97791.8	117619	107795	95302.7	139817	506533	187378	277738	144909
M_0861	TI0889000	C20 H26 O4	330.183	8.36	10284.8	11667.8	8657.53	14582.7	12883.7	8990.08	20912.1	10991.7	13084.4	19627.5	7539.3	7616.69	7114	506219	88981.3	313815	402396
M_0862	Methyl [1-(sulfanylmethyl)cyclopropyl]acetate	C7 H12 O2 S	160.056	0.598	4029.94	410.112	1405	5651.99	272961	3443.21	339684	374631	412623	323988	11357.3	11267.6	5801.93	18308.1	7301.67	7992.06	11375.7
M_0863	Gly-Phe	C11 H14 N2 O3	222.1	1.548	161556	281209	318297	11595.7	505094	372615	357697	178371	163078	245986	247534	210905	279084	221821	342543	353929	332119
M_0864	4-(4-Morpholinyl)-6-(4-morpholinylmethyl)-1,3,5-triazin-2-amine	C12 H20 N6 O2	280.165	8.088	306441	456042	278227	503930	35792.3	77999.5	78293.2	47262.4	83774.4	151744	156613	76139.3	93139.6	142847	75769	60743	85791.3
M_0865	U-44069	C21 H34 O4	332.233	9.333	122563	86368.4	84750.3	503038	4900.54	16759.9	8470.73	28813.5	140486	44482	24612.1	22989.1	30595.4	20825.1	93764.8	21052.5	96995.9
M_0866	3,6-Dinitro-1,4-dihydropyrazolo[4,3-c]pyrazole	C4 H2 N6 O4	198.014	1.326	25483.6	25778.2	29132.8	25942.6	20649.1	29114.3	28388.9	21929.5	18987.6	23433.3	22064.7	24627.4	21592.8	46216.9	59323	46350.7	260435
M_0867	Coumarone	C8 H6 O	118.042	1.631	282621	290804	435795	301460	258540	453421	272264	213519	213680	192918	261183	345743	182240	500929	204021	312058	389683
M_0868	Nonyl N-[(allyloxy)carbonyl]-N-methylglycyl-N-methylglycinate	C19 H34 N2 O5	370.249	9.327	47502.8	188493	35812.3	40451	50502.6	47423.8	84606.7	69743.4	72319.8	180555	33202.3	51862.9	59609.9	499191	259473	139763	403371
M_0869	1,2-Ethanediyldisilane	C2 H10 Si2	90.0323	1.606	229453	208559	349657	206773	221704	319872	251271	256005	255277	491822	279716	447123	459913	122214	278094	282794	473564
M_0870	N,N-Dimethylaniline	C8 H11 N	121.089	1.488	15774.2	15096.3	4490.68	13391.7	14978.9	4909.74	18027.8	13286.1	15441.1	13930.6	18322	13266.5	15357.7	10569.9	17320	11454.8	14230.6
M_0871	N-{1-[4-Amino-6-(dimethylamino)-1,3,5-triazin-2-yl]-3-methylbutyl}leucinamide	C16 H31 N7 O	337.259	8.705	13232.7	2186.8	18125	5984.83	497818	9315.36	440075	16139.3	4267.52	23222.7	10815.1	2334.28	12594.7	9421.27	4462.87	3093.63	2663.77
M_0872	2-O-Phosphonohexose	C6 H13 O9 P	260.03	1.404	293336	495615	412758	358372	72772.1	95548.9	151643	210989	136654	69938	177779	69882.5	113544	55904.5	47035.6	16288.2	14654.9
M_0873	4-Morpholinylacetic acid	C6 H11 N O3	145.074	2.844	40478.1	67836.1	50706.4	57765.5	65628.1	49561.1	51010.6	51154.1	50372.3	49121.8	54190	70786.1	61708	493774	65869.6	3798.4	94009.3
M_0874	1,17'-Dihydroxy-10',11a,13',13a-tetramethyl-2,3,3a,3b,4,4',5,5',5a,6,6',7',8',9,9',10,10',11,11',11a,11b,12,12',13,13',13a,14',15',16',17'-triacontahydro-1H-spiro[cyclopenta[5,6]naphtho[1,2-g]chromene -8,2'-cyclopenta[a]phenanthren]-3'(1'H)-one	C40 H60 O4	604.45	9.093	1967.16	33998.9	5103.72	4887.47	10283.5	19952.6	38981.4	35072.8	6250.99	48028.4	6703.88	36680.1	10820.7	489504	283777	167689	474937
M_0875	Eicosapentaenoic acid	C20 H30 O2	302.226	9.09	11640.4	33998.9	5103.72	5844.49	10283.5	19952.6	38981.4	35072.8	6250.99	48028.4	6703.88	36680.1	10820.7	489504	283777	167689	474937
M_0876	2-Amino-9-(2-deoxypentofuranosyl)-7,9-dihydro-3H-purine-6,8-dione	C10 H13 N5 O5	283.092	2.269	4576.57	3527.12	3507.14	3223.93	114895	47860	117872	95202.6	141511	48987	93173.2	62443.9	30584.4	315102	146293	376093	490661
M_0877	MFCD00037215	C8 H14 N2 O5	218.09	1.267	491144	160760	229324	11197.3	70590.1	117973	122271	8648.73	108105	113367	204811	60541.1	126712	15005.9	41310.5	10639.8	25776.1
M_0878	Rabenzazole	C12 H12 N4	212.105	7.806	61039.3	68578.9	106336	15637.9	173647	262650	276794	297263	198137	490851	228116	305340	207927	57935.6	20720.9	16905.9	24270.6
M_0879	Precocene II	C13 H16 O3	220.11	8.726	195225	289462	313472	203030	349808	462701	411258	308137	313086	269717	315847	490524	239717	225297	297183	311065	302695
M_0880	Dibutyl itaconate	C13 H22 O4	242.152	8.211	146184	128553	113444	172935	99282.4	236301	266334	76000.7	324146	108652	99268.9	489304	76157.3	170954	60573.1	92530.3	177336
M_0881	Docosahexaenoic acid	C22 H32 O2	306.256	9.676	224960	484845	260082	108121	220482	314851	179102	199482	364006	233677	246079	198562	222870	381907	207685	428211	343728
M_0882	7-(2,3-Dihydroxypropyl)theophylline	C10 H14 N4 O4	254.103	6.889	2620.67	2865.21	1653.16	2209.22	2504.29	2765.96	7924.66	1878.74	1693.74	1496.43	2303.73	1651.49	1757.33	1694.9	1668.59	1814.51	10620.6
M_0883	Inosine-5'-monophosphate (IMP)	C10 H13 N4 O8 P	348.047	3.456	73595	478288	201105	105924	42440.3	42720.7	54977.2	295815	40530.9	33627.1	48157.2	54942	48412	28787.9	33041	34792.6	41308.5
M_0884	AM9627000	C8 H7 N O3	165.043	7.463	478199	208489	227804	56390.6	17718.5	16820	19939.6	14298.8	25438.3	13450	35357.3	28687.7	14483.4	12156.8	9734.65	13349.1	15289.3
M_0885	N6,N6,N6-Trimethyl-L-lysine	C9 H20 N2 O2	188.152	1.293	266923	393243	477970	292524	29915.8	38136.7	43733.3	5613.55	50806.1	41724	45889.9	29695	23122.7	152462	7500.28	18364.5	39510.1
M_0886	Maraniol	C12 H12 O3	204.079	8.961	246031	293454	297618	375961	325780	477911	250573	346414	290855	235157	297263	435150	248642	227035	232183	333504	450884
M_0887	(4,6-Di-piperidin-1-yl-[1,3,5]triazin-2-yloxy)-acetonitrile	C15 H22 N6 O	302.185	8.952	1844.61	1719.87	2917.45	1242.36	2899.62	1807.22	1724.34	2313.01	699.01	649.888	693.23	4711.74	477.218	1959.24	2347.36	932.631	476973
M_0888	DL-Citrulline	C6 H13 N3 O3	175.096	1.24	238573	180522	236486	134408	57533.3	60232.1	189880	28743	51188.1	237022	436711	85269.9	20243	108891	335099	120881	256088
M_0889	1-arachidonoyl-sn-glycero-3-phosphocholine	C28 H50 N O7 P	543.333	10.029	34553.3	178203	153554	476514	149547	67583.5	82168.6	164677	55376.2	194344	60278.3	77271.8	155900	8777.83	150084	80731.8	48898.2
M_0890	Temozolomide	C6 H6 N6 O2	194.056	7.418	244995	270033	281014	209465	199019	274861	349491	432401	332925	317916	476045	417372	181540	48949.7	100006	55865.5	93588.3
M_0891	Docosahexaenoic acid	C22 H32 O2	328.238	9.664	222302	475928	257614	105597	218096	308318	176761	197221	356983	231522	239200	191534	219505	382703	192131	421334	337425
M_0892	2,6-Ditert-butylhexahydro-1H,5H-2,3a,4a,6,7a,8a-hexaazacyclopenta[def]fluorene-4,8-dione	C16 H28 N6 O2	336.228	9.34	86101.1	29632.9	79886.9	83765	50033.3	65357.6	57896.5	55844.9	76194.8	24982.5	65597.1	52379.2	10779.8	475030	35241.9	49097.6	30490.4
M_0893	1-carboxy-3-hydroxyadamantane	C11 H16 O3	196.11	8.395	40172.9	43547.1	20905.9	4069.38	4322.42	16566.2	39304.1	16874	35140.7	150506	38797.8	293759	31070.2	29062.7	28331.6	11744.5	26187.4
M_0894	negamycin	C9 H20 N4 O4	248.148	1.117	147958	471809	292355	251933	172268	227798	201644	345952	167306	119381	147999	267972	233921	473476	111172	117209	192584
M_0895	1-(2-Deoxypentofuranosyl)-5-methyl-2,4(1H,3H)-pyrimidinedione	C10 H14 N2 O5	242.09	3.011	323703	304953	316480	287521	268156	282989	226557	239511	285875	223424	334159	318383	345587	355100	325187	393117	297069
M_0896	Fluperlapine	C19 H20 F N3	309.163	8.331	58682.9	42389.6	51120.6	50064.3	107199	67896.1	62279	44157.4	54124.2	45543.9	72099.7	10422.2	46055.1	40614.1	60302.8	37318.9	36411.9
M_0897	Myristamide	C14 H29 N O	227.225	9.322	65807.1	46262.7	45985.8	44669.4	470145	84643.1	361291	52151.1	34002.4	55145.1	31761.5	28560.9	31058.8	24544	29330.6	30104.4	42507.1
M_0898	DA9185000	C12 H10 O S	202.045	1.6	76976.4	205280	215261	468581	386105	359243	307381	294654	259899	283110	276187	321793	220062	39559.6	179829	340233	147448
M_0899	1-{2-[(1-Ethoxy-1-oxo-2-pentanyl)amino]propanoyl}octahydro-1H-indole-2-carboxylic acid	C19 H32 N2 O5	368.233	9.178	96519.8	182493	82397.2	51368.6	86590.6	81184.2	141247	216676	1373.86	184036	60932.3	50401.6	69759.6	467757	263900	162977	358124
M_0900	N4-(2,2-DIMETHYL-1-METHYLCARBAMOYL-PROPYL)-2,N1-DIHYDROXY-3-ISOBUTYL-SUCCINAMIDE	C15 H29 N3 O5	331.211	3.544	467012	20432.6	98275.1	178925	5851.27	5925.76	4962.03	4622.21	5115.06	5088.73	4897.96	5402.6	5357.93	4449.02	12299.5	4912.75	5405.93
M_0901	Indoline	C8 H9 N	119.074	7.174	39599	24118.1	58296.6	42642.7	49898.4	63570.4	76192.8	40246.9	23440.7	42939.1	13578.8	40668.7	10793.5	464493	101821	131911	94602.8
M_0902	SL4860000	C13 H20 O2	208.146	8.438	4183.68	2667.08	31188.4	11339.3	14682.1	2771.78	2667.61	2734.63	31387.6	9076.51	28993.4	3524.59	400888	2609.95	1611.3	1992.74	2641.13
M_0903	Midodrine	C12 H18 N2 O4	254.127	3.26	172816	108192	336160	81548.7	239182	457704	197586	79142.8	10916.6	58936.3	35351.4	462005	242414	5628.65	26131.1	23269.9	23589.8
M_0904	2062850	C23 H34 O3	358.25	8.367	22321.3	11081	26183.7	19913.8	9451.2	9698.88	9506.97	8562.2	8924.71	12049	7713.2	48856.5	13513.4	128519	15072.8	75097.1	461623
M_0905	Allantoic acid	C4 H8 N4 O4	176.054	0.964	135429	72038.9	98026.3	86136.4	207463	199982	161788	103591	113222	79414.9	74841	110775	104249	459866	122362	222686	113690
M_0906	Resorufin	C12 H7 N O3	213.044	4.536	211371	112112	296743	121323	125922	265551	255535	124460	84555	128985	106127	113926	104364	459741	208706	229720	229493
M_0907	4-Morpholinylacetic acid	C6 H11 N O3	145.074	2.256	39420.8	31575.8	35881.4	71693.7	25047.2	158955	51030.5	11098.7	46752	35717.5	21934.2	31678	25249	429079	119870	459133	152493
M_0908	3-Phenylpyrazole-4-carbaldehyde	C10 H8 N2 O	172.064	1.543	145082	236321	269247	9659.15	457531	340809	337494	163434	124331	224646	209703	185662	266270	246056	344255	356645	329564
M_0909	Creatinine	C4 H7 N3 O	113.059	1.318	127348	224533	157539	107518	59847.3	78490.5	89808	196288	38550.6	57350.2	165212	74107.6	125520	307425	301145	452675	345131
M_0910	2-Arachidonoyl glycerol	C23 H38 O4	378.274	9.986	69180	173788	69668.1	41474.7	247267	78959.6	261799	218540	146103	243407	159171	159130	166028	31936.9	291890	154552	88664.1
M_0911	AMOZ	C8 H15 N3 O3	201.111	1.236	25259	33508.9	43597.3	64777.7	24414.3	55578.8	51732.2	19949.2	27702.4	27918.5	39610.9	20714.6	28885.5	451918	101392	101197	91225.2
M_0912	Diethyl formamidomalonate	C8 H13 N O5	203.079	2.721	19479.5	16831.3	27239.7	29787.5	20962.5	20893.8	26267	13261.3	8569.17	23933.7	22524.2	19607.3	21780.5	451780	57069.9	6754.89	15907.6
M_0913	2509	C12 H20 O2	196.146	8.628	156999	168032	367604	101679	135747	155355	98654.1	120108	97969.1	265033	140709	165410	203728	161657	385385	141440	133195
M_0914	2210856	C18 H32 O2	280.24	10.103	83931.5	315963	61556.9	107133	190581	182518	224218	256493	223663	450523	230679	113784	178116	220374	295244	71502.8	156082
M_0915	(1R)-N1'-(3-fluorophenyl)-1-(hydroxymethyl)-7-methoxy-9-methyl-N2-propylspiro[1,3-dihydropyrido[3,4-b]indole-4,4'-piperidine]-1',2-dicarboxamide	C29 H36 F N5 O4	537.274	8.722	34154.4	30075.1	28672	27418.9	25716.7	24279.4	25520.8	25406.2	29485.8	30630	25746.7	25435.5	23641	22790.1	23996.4	45945.9	21837
M_0916	1,4-Diphenyl-1,4-diphosphinane	C16 H18 P2	272.088	8.643	307120	448560	355885	2937.67	8648.71	1697.07	1104.39	191315	353004	2506.31	360522	1600.66	1953.9	186158	868.001	1658.46	158956
M_0917	S-(2-Methyl-2-propanyl) 2,3-dimethyl-5-oxohexanethioate	C12 H22 O2 S	230.134	7.434	89211.1	281413	58392.7	151351	150246	35482.6	105779	125212	260076	175784	224080	57759.2	94770.2	448176	72171.2	43403.4	53633
M_0918	2,6-Dimethyl-γ-pyrone	C7 H8 O2	124.053	7.626	271247	288279	268250	290333	8107.86	43358.3	43305.6	436349	446829	31723.1	29862	272301	315178	6792.37	199461	176026	195400
M_0919	N-[3-(3,5-Dimethyl-1H-pyrazol-1-yl)-5-ethyl-4H-1,2,4-triazol-4-yl]acetamide	C11 H16 N6 O	248.139	8.491	84729.1	33359.8	34786.5	446089	51981.9	77896.2	58532.8	28981.7	20609.7	81611.3	84710.9	56360.8	63742.7	95079.8	47389.3	64781	8477.67
M_0920	2-Oxo-4-pentenoate	C5 H5 O3	113.025	1.065	98479	53466.8	70680.9	28694.3	5970.14	19412.1	18746	5496.96	7203.09	23950.8	26227.4	23416.1	28866.4	133960	445088	25546.5	95900.6
M_0921	1886839	C20 H30 O4	334.214	8.255	91946.5	63308.1	103385	103831	124729	115196	169309	121823	100156	107339	113418	19606.1	21086.8	156638	254039	110687	135776
M_0922	Acetanilide	C8 H9 N O	135.069	1.629	251807	268434	377603	276851	234854	394983	246188	187377	184645	176089	223378	311237	146271	443660	185431	280434	334701
M_0923	leucoline	C9 H7 N	129.058	6.105	1823.23	1663.43	2563	1700.16	1650.97	2149.44	2405.96	2119.97	1709.9	1475.99	2181.31	1644.74	1693.98	1976.56	1680.95	1703.98	2282.61
M_0924	Glycerol (1-(12-Hydroxystearate))	C21 H42 O5	374.304	9.067	411473	439979	336673	424703	177656	217952	179157	289639	319656	225700	179899	225902	197736	223008	215123	168687	278226
M_0925	NL8513000	C11 H13 N O2	191.095	1.665	254136	318164	269429	320708	224458	294246	315977	207553	439940	121991	194880	246078	66254.7	41026	24315.1	26865.1	22533.7
M_0926	Coumarone	C8 H6 O	118.042	1.25	284286	191925	437480	190752	177253	354786	325986	256049	259169	113939	144308	220918	99954.7	274628	135679	127707	270503
M_0927	n-Amylbenzene	C11 H16	148.125	8.668	342613	295732	436612	270907	247084	226341	149201	243271	331878	393008	270291	201778	261143	250326	201823	211180	99255.9
M_0928	D-Serine	C3 H7 N O3	105.043	1.259	334892	365654	436433	339597	325226	364129	340392	377477	368895	176159	291709	411738	340553	193103	279612	202013	213284
M_0929	Epitestosterone	C19 H28 O2	288.209	8.59	8143.13	12168.2	7741.08	434791	9986.15	125646	35963.3	57642.5	20322.3	5290.44	18052.3	54615.6	15473.4	7095.88	5802.67	6963.96	7978.75
M_0930	1-(4-Nitrophenyl)piperidine	C11 H14 N2 O2	206.106	1.542	132839	139694	202654	4931.89	282094	239924	241084	109453	75894.3	160523	169191	165518	165299	189484	292336	222178	389953
M_0931	Adenosine 5'-monophosphate	C10 H14 N5 O7 P	347.063	1.505	220603	201532	255519	207501	161830	206096	194946	79132.4	78109.9	123382	122105	149040	202121	8437.2	110146	6663.51	432844
M_0932	Thymine	C5 H6 N2 O2	126.043	2.903	24402.9	110954	23448.2	177696	143383	92860.8	234697	144385	227538	75498.3	96717.6	26033	39836.4	183997	194817	434113	264825
M_0933	3,4-Dihydroxyphenylglycol O-sulfate	C8 H10 O7 S	250.015	7.123	12428	866.67	16269.5	7105.88	3935.19	12139.7	13339.2	2728.31	2709.52	6349.25	2653.32	8746.06	1949.19	38256.3	38671.6	32994.3	53251.7
M_0934	L-(+)-Valine	C5 H11 N O2	117.079	0.598	32188	202334	433189	19017.6	19164.9	401110	20047.7	18000.9	159692	43451.4	102288	43904.2	18285.3	32407	36890.3	30411.1	217389
M_0935	Azelaic acid	C9 H16 O4	188.105	8.503	173966	81752.9	269913	30535	47817.1	43325.1	45623.4	213997	37606.5	374505	34257.9	39399.3	27829	432922	37798.8	36931.9	53781.7
M_0936	3-Methoxy-5-(methylsulfonyl)-4-isothiazolecarbonitrile	C6 H6 N2 O3 S2	217.982	1.179	217383	131422	112468	91019.8	18923.5	31882.4	48352.3	53955.1	61329	96970.9	77312.9	24330.7	47389.9	431367	182828	138490	192557
M_0937	2-Pyrrolidone	C4 H7 N O	85.0532	0.598	6094.86	2916.95	430662	10848	11563.4	399944	11497.5	15018.3	5718.97	31079.4	17793.1	34134.3	10834.6	22188.6	22775.3	22074.4	24457.6
M_0938	Cafestol	C20 H28 O3	316.202	8.884	44266.3	125307	40281.1	159584	11492.5	35766.9	65018.5	108121	312444	120254	32019.5	41735.6	38350.3	363394	232144	19874.1	428985
M_0939	N-Benzoyl-DL-alanine	C10 H11 N O3	193.074	5.788	419298	7685.28	130532	2918.05	3214.34	2944.72	428869	69944.5	2123.5	2115.11	7790.61	4529.2	4025.41	9263.65	129520	404256	356213
M_0940	(2E)-3-[3-(Cyanomethyl)-7,8,12,13,17,18-hexaethyl-2-porphyrinyl]acrylonitrile	C37 H40 N6	568.334	10.101	103920	7529.08	1900.84	56425.3	154091	83911.5	211882	370069	14732.8	428743	108599	128457	146575	2440.71	138668	32819.4	138687
M_0941	AMOZ	C8 H15 N3 O3	201.111	1.545	86469.5	20535	138933	85166.1	64913.6	105016	89089.3	98653.5	80114.6	81424.7	153078	84459.9	109308	428008	312802	113235	281601
M_0942	2,3-Dihydroxypropyl 2-(methylamino)ethyl hydrogen phosphate	C6 H16 N O6 P	229.071	7.294	256385	72286.7	427409	99499.2	90151.6	234113	240455	23823.1	9214.34	93546.6	81461.6	94441.5	47740.4	13528.8	8334.24	13191	100792
M_0943	N-(2-Hydroxyethyl)-N-[2-(octanoylamino)ethyl]-beta-alanine	C15 H30 N2 O4	302.222	10.094	237510	425934	147960	131697	194093	195590	220555	260831	274973	337535	219713	150731	249748	208776	266504	130796	190401
M_0944	Tetrahydrogestrinone	C21 H28 O2	312.206	9.622	425470	373862	193913	75221.7	41411.4	41946.2	84988.4	18570.9	256505	273381	150591	49719.3	131103	137631	134405	42502.7	74614.2
M_0945	Olomoucine	C15 H18 N6 O	298.154	8.611	424772	160746	384630	400419	61939.3	80587	139869	113062	99210.9	84578.7	83103	86685.7	63740.6	41588.6	42935.6	39079.6	39166.3
M_0946	Guanosine monophosphate	C10 H14 N5 O8 P	363.058	2.143	28889.3	28081	29486	25662.7	316357	15850.9	14351.3	9088.3	8826.61	350770	14609.5	312358	1070.56	941.588	15023.4	3056.52	28883.6
M_0947	Butyl O-phosphonoserinate	C7 H16 N O6 P	241.071	1.305	423729	235117	169399	95743.5	62999.3	71617.5	9517.83	117168	100420	143259	99896.5	7920.79	7326.44	15683.7	12832.2	10796.8	8984.41
M_0948	1-Allyl-3-(7H-purin-6-yl)urea	C9 H10 N6 O	218.092	7.54	129102	122326	45342.8	147737	119530	164016	86985.6	67899.4	80685.3	168176	88386.5	131447	52035.1	58537	48882.4	39731.8	34163.3
M_0949	2-(Dimethylamino)-4,6-dimorpholino-1,3,5-triazine	C13 H22 N6 O2	294.181	9.143	356846	17902.9	310174	344176	246983	401218	264926	419833	289386	285984	209750	250576	107922	287241	108931	174286	390947
M_0950	Eicosatetraynoic acid	C20 H24 O2	296.177	8.39	14796.2	14019.9	14552.5	14519.4	14934.8	13707.9	13784.9	14352.4	14862.8	14313.5	14471.1	14051.6	10692.8	419736	145943	217499	276346
M_0951	Methyl 3,3,3-trifluoropyruvate	C4 H3 F3 O3	156.004	1.436	28987.4	43142.7	41912.7	38915.2	26443.7	38020	38947	246636	132648	73385.4	31320.9	37301.6	31439.8	63755	34003.5	3578.46	44090.6
M_0952	3H-1,2,4-Triazol-3-one	C2 H N3 O	83.012	1.197	214447	115527	136838	152437	138296	246506	310820	174646	198501	319279	249700	243826	215820	418125	301011	234530	283425
M_0953	DO0750000	C15 H24 O2	236.178	8.622	149520	193091	137958	417148	110373	200198	56764.2	173368	149225	182865	173670	228975	350966	82475.3	65344.8	127958	88142.1
M_0954	Z-ORN-OH	C13 H18 N2 O4	266.127	2.636	415201	25646.5	54460.7	198106	3595.12	3773.36	3666.38	3618.51	3461.23	3607.85	3538.12	3823.55	3584.47	5005.3	3942.1	4085.61	4001.7
M_0955	negamycin	C9 H20 N4 O4	248.148	1.29	15915.4	414985	347905	8426.92	4912.12	19866.4	10243.6	17168.8	4419.18	5487.98	3610.3	13580	11546.1	176285	4483.83	134254	116982
M_0956	Glucosylurea	C7 H14 N2 O6	222.085	1.17	366647	229305	338021	89330.2	267119	291288	269888	306339	272114	230165	414129	245050	198319	21297.4	114023	268076	137234
M_0957	FZ5600000	C27 H44	368.344	9.565	6372.58	11365.6	191971	305574	269022	307645	106135	201871	54991.3	310292	300673	280660	413228	6011.1	338754	138249	278220
M_0958	ACPC	C4 H7 N O2	101.048	1.277	171062	121252	196991	149511	42357.8	320117	276075	142102	392687	198524	390249	202283	334105	324974	292102	312374	315395
M_0959	4-(3-Aminopropyl)-1-methylpiperazine	C8 H19 N3	157.158	0.799	310172	412368	329305	22623.7	32021.9	62934.2	31212.5	93083.9	82550.4	32879.3	120695	59928.9	59102.4	100442	60294.4	24483.6	12883.6
M_0960	4-(3-Aminopropyl)-1-methylpiperazine	C8 H19 N3	157.158	0.895	310172	412368	329305	22623.7	633.928	722.304	959.299	93083.9	2960.43	1388.79	759.88	59928.9	839.347	753.584	60294.4	1852.61	655.988
M_0961	PTA	C6 H12 N3 P	157.077	3.549	117213	146979	100951	169425	247496	226382	157543	409696	252827	204833	343942	189992	238536	349481	373335	400075	215779
M_0962	L-Histidine	C6 H9 N3 O2	155.07	0.92	23613.9	31329.7	124997	296322	361697	22577.4	217587	150949	257311	25561.4	282237	28647.6	44988.3	213878	43409	409420	47747.9
M_0963	4,4'-Methylenebis[2-tert-butyl-6-(.alpha.-methylbenzyl)phenol]	C37 H44 O2	520.336	8.975	8291.45	407766	7935.03	8691.53	8043.52	23408.8	7551.7	2576.76	8003.75	6585.9	7431.95	24004.9	16834.8	16731.4	17743.8	10417.4	27593.4
M_0964	4-Morpholinylacetic acid	C6 H11 N O3	145.074	1.244	63093.3	118898	72007.7	80455.4	94160.2	134814	145152	84268.5	99154.9	155257	195913	202856	221780	206432	167729	406073	217195
M_0965	Rhodamine 6G	C28 H30 N2 O3	442.226	7.721	3866.92	4039.2	6302.77	4604.56	9234.16	2039.87	12080.5	92812	2449.3	11685.2	65048	3773.48	405933	32122	34437.5	321112	261746
M_0966	(+)-Alantolactone	C15 H20 O2	232.146	8.575	97470.6	176872	86414.5	405410	21559.6	11903.4	19489.7	37930	63813.7	87286.2	119332	50479.7	104742	92753	16163.4	4795.59	5003.51
M_0967	N-Boc-L-valine	C10 H19 N O4	217.131	1.317	2557.72	29102.3	12133.2	127783	1297.6	14198.5	10356.2	4062.54	1466.16	1757.67	5350.21	4842.36	7382.09	404912	40084.1	55153.2	2478.98
M_0968	N-Boc-L-valine	C10 H19 N O4	217.131	1.256	19390.3	26845.3	51632.3	127783	21017.6	38338.6	47156	18753.4	8026.89	17984.8	14107.5	18980.1	11700.6	404912	20018.9	302804	55823.6
M_0969	ACETYL PROLINE	C7 H11 N O3	157.074	3.254	40959.2	42199.5	12049.6	48613.5	151728	46182.5	68618.8	58962.7	23016.2	14651.9	42052.6	63224.9	21168.7	131710	404486	214764	85578.9
M_0970	phenacetin	C10 H13 N O2	179.095	2.669	24649.4	68912.5	51793.6	15498.9	390335	39278.2	321272	137450	248475	247400	152618	402362	166743	14905.8	11650.3	4386.26	4190.05
M_0971	DL-Lysine	C6 H14 N2 O2	146.106	1.6	33416.8	205895	338544	138531	27880.1	43796	59253.1	24169	59537	64268.9	56519.2	123178	23328.7	401566	69991.7	96807.9	82350.7
M_0972	1-[(9E)-9-Octadecenoyl]pyrrolidine	C22 H41 N O	335.319	9.462	206186	134975	263171	169667	161364	401042	142116	168403	98809.5	43570	203071	110223	179210	134807	256562	213154	255283
M_0973	Phenol	C6 H6 O	94.042	1.244	274303	163432	400884	178157	171981	144292	323440	247827	245721	114938	129554	211291	91134.5	266331	70796.5	121186	119417
M_0974	Hydroxymethylfurfural	C6 H6 O3	126.032	1.234	239587	185403	269577	24248.2	278725	64037.2	232235	318777	188866	264749	100728	75255.3	112290	26196.2	38269.4	123526	90682.2
M_0975	DL-Tryptophan	C11 H12 N2 O2	204.09	1.543	132367	208370	242536	4977.47	397574	294032	295064	148711	110541	199992	184337	166609	241315	208451	296081	312475	266015
M_0976	Acetanilide	C8 H9 N O	135.069	1.243	268462	133041	397063	173341	169221	194167	317270	244034	238422	112107	126372	206722	88275.8	261169	66865.4	117453	260716
M_0977	Isopropyl N,S-diisopropylcysteinate	C12 H25 N O2 S	247.161	7.433	78953	249568	53377.7	138831	136184	32834.8	97895.7	112145	232082	159603	204745	52320.5	85200.1	396329	64944.8	41187.6	86157.5
M_0978	Docosahexaenoic acid	C22 H32 O2	328.24	9.663	5499.48	396249	4720.13	4893.89	4564.03	4815.09	3832.55	4325.07	4442.51	4443.92	4231.16	4246.12	3812	238930	4041.69	4155.42	4735.59
M_0979	611459	C16 H29 N O	251.225	8.631	5768.49	5919.69	6070.03	5899.25	396002	5600.35	269742	5860.28	5294.64	5731.89	5440.31	5431.9	4614.68	4434.33	4888.61	5042.35	5036.97
M_0980	12,12,23,23-Tetramethyl-2,5,8,11,13,16,19,22,24,27,30,33-dodecaoxa-12,23-disilatetratriacontane	C24 H54 O12 Si2	590.317	9.869	178554	26075.3	18508.5	9946.28	18323.1	16468.2	395872	107071	12199.9	4280.63	69954	10494.6	120064	41046.6	12045.9	18874	33952.3
M_0981	4-(5-Amino-1,3,4-oxadiazol-2-yl)-1,2,5-oxadiazol-3-amine	C4 H4 N6 O2	168.04	5.24	64691.4	75621.4	192996	76368.8	66881.3	84607.8	77117.1	3506.74	117886	82410.3	76213.1	84189.2	81794.2	78346.7	286390	46123.4	394073
M_0982	2127	C7 H6 O	106.042	8.768	4495.09	393961	78403.2	11942.3	4176.09	3917.79	5366.01	6807.57	4557.45	9080.6	14368.1	10717.2	8331.94	7232.49	4062.04	2690.77	4016.04
M_0983	3-{[4-(2-Furoylamino)-3-hydroxyphenyl]carbamoyl}-5-nonadecenoic acid	C31 H44 N2 O6	540.322	10.324	38888.7	117800	92868.3	59161.1	161788	109606	144520	111632	110533	277023	85459.4	222751	49426.3	7598.72	44038	130215	185495
M_0984	3-Acetyl-4-thiazolidinecarboxylic acid	C6 H9 N O3 S	175.03	6.038	279958	235898	391768	301511	31687.8	59648.9	5442.37	6695.68	2911.44	43761.1	146438	24169.7	48025.5	38897.8	13198	181374	48818.3
M_0985	1H-1,2,4-triazolo[4,3-b][1,2,4]triazole-3,6-diamine	C3 H5 N7	139.061	1.008	7337.52	7007.94	8315.79	10192.3	10928.4	6950.91	7830.3	8421.58	12872.6	8882.75	9779	10305.8	12061.4	7047.74	15013.1	5903.86	14162.8
M_0986	(2S,8R,14Z,17Z,20Z,23Z)-2-Ammonio-8-[(heptadecanoyloxy)methyl]-5-oxido-10-oxo-4,6,9-trioxa-5-phosphanonacosa-14,17,20,23-tetraen-1-oate 5-oxide	C43 H75 N O10 P	796.513	10.805	2002.62	1658.69	32432.8	17435.6	19437.4	201866	14669.4	19292.1	15950.5	8746.4	15977.1	11126.4	4756.82	25307.4	16551.9	4000.56	3766.19
M_0987	4'-Fluoroacetophenone	C8 H7 F O	138.049	1.151	53804.9	31627.6	122068	42378.6	133679	199395	143677	76092.7	27600.8	54145.6	73972.3	134143	91180.8	116036	70382	388645	115768
M_0988	7936339	C10 H11 N5 O3	249.086	2.565	66295	52654.9	388535	127857	24658.1	46106.3	122840	42576.5	34774.2	30505.6	121082	49743	53343.9	51327.4	64531.8	25067	45688.5
M_0989	MFCD00037215	C8 H14 N2 O5	218.09	1.216	44715.2	24187	58373.6	29071.7	115157	159370	142782	92434.4	55905.6	64911.4	83991.1	139337	102083	25218.4	46424.9	388214	66158.1
M_0990	2,4,6-tricyclohexyloxy-1,3,5-triazine	C21 H33 N3 O3	375.252	10.797	30850.8	27946.8	22824.2	30398.9	27472.9	28444.2	38002.6	22513.1	23836.8	26844.3	38521.2	26732.2	387989	35943.4	267495	256531	70635.5
M_0991	DL-Stachydrine	C7 H13 N O2	143.095	1.553	98255	119991	94402.6	125322	136872	159118	313573	108373	61225.5	216548	106169	223768	179101	325639	192261	92412.4	387447
M_0992	ACPC	C4 H7 N O2	101.048	1	1114.56	1102.33	1179.81	1244.73	1233.4	1245.34	1203.96	386451	238206	1238.2	223579	1243.94	1297.36	1274.82	1190.05	1359.51	4001.03
M_0993	2-(Methylsulfanyl)-N-phenylbenzamide	C14 H13 N O S	243.072	1.177	198244	270611	222890	383995	232594	209677	266130	260871	213875	289419	329299	194464	252142	192374	273860	185352	219555
M_0994	Thiamine	C12 H16 N4 O S	264.104	0.813	383694	192100	350243	257799	144081	134095	194689	156220	129023	104942	116678	104664	157507	50099.6	59197.7	39574.9	80600.9
M_0995	alpha-D-Galactopyranose, 1-O-[hydroxy[[hydroxy[[(2E,6E,10E,14E,18E,22E,26E,30E,34E,38E)-3,7,11,15,19,23,27,31,35,39,43-undecamethyl-2,6,10,14,18,22,26,30,34,38,42-tetratetracontaundecaen-1-yl]oxy]phos phinyl]oxy]phosphinyl]-, ion(2-)	C61 H100 O12 P2	1086.67	9.999	180454	383649	148640	205335	158760	140152	202501	229524	57177	277890	107518	121828	203222	37225.8	63501.7	139423	227214
M_0996	Myristyl nicotinate	C20 H33 N O2	319.251	9.072	18506.7	92586.7	18105.4	14065.8	50012.4	28197.4	22975.8	188077	20440.3	121535	59215.2	95045.5	62573.5	276336	228430	77043.9	102242
M_0997	Myristyl nicotinate	C20 H33 N O2	319.25	9.114	222265	102687	33830.2	14212.5	40103.1	79407.3	362087	206092	86225.3	210359	29429.9	95045.5	63392	276336	321782	101167	264628
M_0998	17α-Methyl-androstan-3-hydroxyimine-17β-ol	C20 H33 N O2	319.249	9.153	47532.9	92985.9	16481.6	34247.4	378411	353937	75759.7	132167	81943.2	12640.9	30521.5	10451.8	47582.9	34954.7	26656.1	56728.7	54170.7
M_0999	2707	C8 H14 O	126.105	9.258	59266.9	68488.2	54282.8	59536.4	51216.6	207746	53618.7	52346.8	54968.2	51719.2	51041.1	365130	356590	298203	234979	57014.4	79957.9
M_1000	Hydroxyacetylaminofluorene	C15 H13 N O2	239.095	2.706	117187	142311	164470	164603	160839	377002	263843	117577	169565	191127	313924	291703	188108	46971.8	50214.5	30436	68570.8
M_1001	N-(4H-1,2,4-Triazol-4-yl)-1H-1,2,4-triazole-5-carboxamide	C5 H5 N7 O	179.056	4.233	65499.8	76493.6	137946	102143	18334.8	75591.9	48688.3	13706.4	7049.15	57923.8	53062.6	29244.4	89622.5	376888	25985.3	17627.1	40619.7
M_1002	2,4,6-Triamino-1,3,5-cyclohexanetriol	C6 H15 N3 O3	177.111	1.194	88557.7	64894.8	85625	32834.6	41190.4	101023	80892.3	46531.3	23981.4	91738.6	24597.1	49262.8	63821.2	374498	125834	131692	120589
M_1003	Tetrafluoro(selenoxo)molybdenum	F4 Mo Se	253.816	1.354	2800.84	2821.33	3308.37	2825.32	8264.5	94051.2	2879.76	2459.21	2250.16	3810.43	2528.33	2970.56	2548.5	26906.2	89510.4	141476	374204
M_1004	tris(3,5-dimethyl-1-pyrazolyl)methane	C16 H22 N6	298.191	9.045	319332	344572	240622	202361	88509.8	74737.7	129247	30397.3	331359	373294	141442	53782.6	84318	214225	98514.5	97321.8	95206.5
M_1005	Aceglutamide	C7 H12 N2 O4	188.08	1.517	47297	12328.7	25390.7	32456.9	40881.1	53195	39121	14049.8	5509.23	7012.98	92825.2	28161.7	30406.2	373263	34916.4	31924.7	52543.4
M_1006	5-Hydroxy-3,3,6,6-tetramethyl-4-thiepanone	C10 H18 O2 S	202.103	6.327	73686.9	189992	34606.2	99519.7	71737.5	25978.5	60087.9	58442.7	100499	70718.9	161579	27994.9	126500	373132	70469.2	61347.4	104061
M_1007	4,5-Difluoro-1,2-benzenediol	C6 H4 F2 O2	146.018	0.787	202545	158919	242396	273019	112747	166216	104285	86264.6	44338.4	90542.1	76422	65050.8	78747.1	285574	282184	182114	372903
M_1008	1-(4,6-Diaminopyrimidin-5-yl)guanidine	C5 H9 N7	167.092	1.219	9874.43	8658.56	10172.3	9094.74	9661.6	10368.9	9895.06	4188.46	8077.66	9417.63	8519.65	8496.42	1954.96	96230.1	81655.6	131740	370771
M_1009	172966	C11 H9 N O3	203.058	1.58	9245.72	8820.65	12370.4	9550.39	10098.5	13694.8	10993.3	9209.18	6850.29	9534.97	8981.81	11763.8	9263.18	19272.1	11422.1	12620	10585.3
M_1010	hexahydropyridazine-3-phosphonic acid	C4 H11 N2 O3 P	166.051	0.793	367790	244758	250333	279288	81203.6	141874	96492	52372.4	45500.5	80596.9	79161	53870.3	58192.8	295544	160202	115505	214230
M_1011	all-cis-4,7,10,13,16-Docosapentaenoic acid	C22 H34 O2	330.256	9.328	36785.7	95184.4	3174.72	29970.8	40092.4	23855.7	65337.5	33156.1	32287.3	116601	31679.9	29858.2	46929.8	367715	212454	109374	257012
M_1012	1-(4Z,7Z,10Z,13Z,16Z,19Z-docosahexaenoyl)-sn-glycero-3-phosphocholine	C30 H50 N O7 P	567.331	10.069	16975.3	120660	40470.5	12740.2	49448.9	41126.4	50063.1	12320.8	34880.1	40173.4	37313.8	22974	29553.3	1486.83	10205.8	15290.2	34302.5
M_1013	1H-1,2,4-triazolo[4,3-b][1,2,4]triazole-3,6-diamine	C3 H5 N7	139.061	0.681	180005	213554	212066	65885.2	220370	219297	232804	224724	239823	234809	18546.8	241507	250152	223327	228548	320486	180620
M_1014	(E)-Dacarbazine	C6 H10 N6 O	182.092	4.696	181211	184665	15470.1	99393	70668.2	167359	132252	75480.9	265534	194404	351566	152017	237492	124526	220256	277874	182682
M_1015	1,6-cleve's acid	C10 H9 N O3 S	223.03	6.424	153921	364112	213247	321470	239308	250300	71654	165821	26900.8	190384	8696.04	28630.4	259527	85575.5	97939.4	115504	16066.9
M_1016	Cyclamic acid	C6 H13 N O3 S	179.062	1.571	127078	86404.2	196692	152298	167460	181147	363903	115012	118751	56787.3	110919	299058	95463.7	139293	79608.4	239193	70585.5
M_1017	2-Isopropyl-5-methylbenzoic acid	C11 H14 O2	178.099	7.623	126114	132924	13710.8	9108.55	23095.2	116110	91822	163350	363577	14594.7	14711.2	96151.3	32565.3	92939	98681.4	73924.2	77942.2
M_1018	Dodecyl 2,6-dioxo-1,2,3,6-tetrahydro-4-pyrimidinecarboxylate	C17 H28 N2 O4	324.204	10.096	210598	363053	144302	107207	158572	160970	170674	205000	232898	240346	196146	130498	204729	175351	202942	112463	155634
M_1019	Olomoucine	C15 H18 N6 O	298.154	8.801	340533	193009	219365	362761	137783	180122	26246.3	136913	41706.5	28014.2	109674	34935.5	72371.3	24216.9	27926.4	19630.4	22167.2
M_1020	4-Methyl-2,6,7-trioxa-1-phosphabicyclo[2.2.2]octane 1-sulfide	C5 H9 O3 P S	180.001	1.213	9851.66	22963.5	12958.6	10718.8	302790	138469	242168	172918	85653.4	361763	346150	241951	344924	62312.3	151207	99319.9	80322.7
M_1021	7-Deazaguanine	C6 H6 N4 O	150.054	1.341	111724	113649	141302	81269	181011	48038.6	112246	167865	114879	77751.7	111437	247799	245189	297250	309520	13697.5	66621.6
M_1022	Phenobarbital	C12 H12 N2 O3	232.085	6.621	126654	61012.8	154138	37002.2	118231	296942	115455	22961.1	26605.2	105518	94976.4	302599	74087.4	202520	112078	195681	360914
M_1023	Vorinostat	C14 H20 N2 O3	264.147	3.515	168090	359595	60918.7	74504.1	1654.9	4862.88	4064.98	3384.85	3931.26	3585.13	3574.11	14070.6	4898.18	3134.43	3352.6	3788.23	4297.3
M_1024	Bis[(2-isopropyl-5-methylcyclohexyl)oxy](2-methoxyphenyl)phenylsilane	C33 H50 O3 Si	522.352	10.35	164226	253902	220152	113005	235703	188292	229123	209824	149119	359389	187171	260952	294435	56786.8	150913	148371	215481
M_1025	Triisopropanolamine	C9 H21 N O3	191.152	1.069	37220.8	52284.4	358250	57010.3	33255.2	9335.9	53653.5	25470.4	25762.4	41532.6	21095.4	68502.5	27744.6	25981.5	12455.8	25579	25246.6
M_1026	Embelin	C17 H26 O4	294.183	8.415	14541.9	49464.5	44862	5131.02	37668.4	18975.1	357840	50454.8	39395.1	38412.7	35215	25695.8	7358.84	25609.5	22005.2	27600.9	24489.4
M_1027	Cyclohexylamine	C6 H13 N	99.1053	1.474	10728.3	25308.1	355520	8828.25	21260.2	5883.03	14618.4	5155.15	17800.6	12117.1	3980.02	4901.93	4971.42	9094.27	15225.8	6452.46	21598.2
M_1028	bis(tetrazolyl)amine	C2 H3 N9	153.051	1.462	21476.4	31003.9	16033.7	71887	297992	13009.8	355165	61698.5	23583.8	180433	20915.6	60612.5	56956.9	17072.3	4940.25	17421.3	5567.27
M_1029	BOC-GLU-OTBU	C14 H25 N O6	303.168	2.452	73575.7	47524.2	50964.5	97767.5	11167.1	14316.2	23509.7	19194.1	28462	21256.7	145897	23384.3	27027.7	354751	65139.2	10559.8	88638.9
M_1030	Divinyl sulfone	C4 H6 O2 S	118.009	1.185	55970.1	84012.1	59112.5	93442.6	130739	79842.2	46246.5	155795	354694	92065.2	222291	60486.2	156816	45304	39648.1	114440	109076
M_1031	2-Bromo-3-methylthiophene	C5 H5 Br S	175.929	0.997	354521	203012	138505	209895	119440	61749	107565	153111	127064	128603	69987.5	144392	105102	101704	142291	78986.2	71557.8
M_1032	Eugenol	C10 H12 O2	164.084	7.812	133929	144023	106781	235673	144081	209132	132072	219676	144018	353099	316093	252131	132405	68159.8	13542	8289.04	119086
M_1033	(4Z)-4-[Nitroso(1H-triaziren-1-yl)methylene]-4,5-dihydro-1,2,5-oxadiazol-3-amine	C3 H3 N7 O2	169.035	1.318	181932	248307	327403	149617	113164	124110	259066	166908	194608	244354	255769	147568	353043	188929	125404	73502.9	224612
M_1034	2210856	C18 H32 O2	280.24	9.18	173154	318427	126675	236272	102625	185314	200973	203233	269425	260996	175997	89425.7	123311	143838	185922	70318.7	211679
M_1035	Nicotinamide	C6 H6 N2 O	122.048	1.495	122017	350726	254115	194678	147239	126829	158445	145652	157416	96055.4	176596	76057.1	65767.6	51939.6	166470	40162.3	76991.4
M_1036	(Chloromethyl)phosphonic acid	C H4 Cl O3 P	129.958	0.645	83857.1	271827	12225	14526.3	166295	19226.7	14531.2	19390.8	38515.8	27893.6	348653	34625.8	178133	9665.54	23500.6	221961	25567
M_1037	1422990	C9 H19 N O2	173.142	2.034	85157	99416.8	61578.7	89755.1	16148.7	37814.3	50961.3	55564.9	10111	31801.3	6294.87	44766.9	23179.4	348605	263185	230003	202358
M_1038	tert-Butyl (4R,6R)-6-cyanomethyl-2,2-dimethyl-1,3-dioxane-4-acetate	C14 H23 N O4	269.163	7.784	296574	149431	348297	75110.6	114253	242052	187374	45424.3	50827.5	115153	89683.1	184298	101674	29318	133610	59330.4	97653.6
M_1039	Amphetamine	C9 H13 N	135.105	1.499	7328.68	24619.3	9515.13	22594.8	28680.9	25620.6	8499.41	23561.9	19103.8	25612.6	23468.4	24684.7	27597.8	15807.5	25258.9	30484.7	31145.3
M_1040	2-(2-(2-(2-(4-nonylphenoxy)ethoxy)ethoxy)ethoxy)ethanol	C23 H40 O5	396.286	9.062	310481	319431	225615	346873	111597	151739	116966	204030	212772	170162	108413	152420	134872	160892	155013	113126	216571
M_1041	Disperse red 11	C15 H12 N2 O3	268.082	7.292	4391.19	163772	271392	144422	154661	152333	173087	138262	123819	223592	135068	175144	61266.3	321114	198435	2298.59	343784
M_1042	1,11-Diamino-3,6,9-trioxaundecane	C8 H20 N2 O3	192.147	1.131	12001.6	11943.7	17449.4	14179.5	12740.9	7583.54	20673.3	12740.7	11837.9	11738.7	13023.9	15452.2	10913.3	131498	343338	39884.6	167563
M_1043	MFCD03701570	C8 H7 B O4	178.044	0.789	290184	217151	298042	284964	111131	195156	119650	92959.1	55316.6	98149.8	106361	87599.8	90389	182465	319407	180222	343206
M_1044	DA9185000	C12 H10 O S	202.045	1.513	202647	169874	286038	342996	299337	324620	267811	263296	231381	245805	231087	269137	197474	30231.9	116426	295384	14364.7
M_1045	Roxatidine	C17 H26 N2 O3	306.196	9.503	183206	341599	138888	131566	31076.4	33760	81595.6	16544.1	151343	217937	47436.1	55159.1	57323	144827	26605.6	28987.2	67899.9
M_1046	2127	C7 H6 O	106.042	2.365	276602	231305	112605	56028.2	269651	40779.6	291995	225721	45584.9	176835	49219	72674.1	216094	87535.9	332738	122613	60126.2
M_1047	5,5-Dimethyl-3-[2-(2-oxiranylmethoxy)propyl]-1-(2-oxiranylmethyl)-2,4-imidazolidinedione	C14 H22 N2 O5	298.153	8.874	340533	193009	2647.27	2478.65	1501.59	1409.48	1295.29	8795.97	1853.27	1375.56	1049.99	1927.71	1186.84	1384.24	2481.93	1100.53	4966.03
M_1048	1,1'-Octahydropentalene-2,5-diylbis(4-phenylpiperazine)	C28 H38 N4	430.308	9.191	121220	186357	79304.8	64717.4	122225	89972	122416	86701.4	110806	101137	86957.1	83848.1	110646	115386	181213	232407	339953
M_1049	MFCD01656717	C6 H10 O6 S2	241.993	7.769	35735.8	55456.8	84889.9	16574.6	46178.4	260468	37389.5	338061	15618.2	102715	209171	117909	35849.6	8180.12	6887.15	6498.97	5786.74
M_1050	(8S,9S)-6-[(2R)-1-hydroxypropan-2-yl]-8-methyl-9-[[methyl(pyridin-4-ylmethyl)amino]methyl]-10-oxa-1,6,14,15-tetrazabicyclo[10.3.0]pentadeca-12,14-dien-5-one	C22 H34 N6 O3	430.27	8.521	65047.4	63509.2	162834	37027.6	7603.23	20568.3	4489.23	127996	74054.2	81683.7	52993.2	337676	80357.6	25398.9	31082.7	11008.2	97856.5
M_1051	1-[1-(4-Amino-1,2,5-oxadiazol-3-yl)-5-methyl-1H-1,2,3-triazol-4-yl]ethanol	C7 H10 N6 O2	210.087	11.364	27287.9	37023	32990.4	40201.3	31060	33767	35261.5	29281.6	28443	34153	34173.7	37806.9	336869	32896.1	35424.8	32754.1	30620.1
M_1052	MFCD01656717	C6 H10 O6 S2	241.993	7.899	11982.1	148058	3933.34	10653.1	113858	201326	21199	17417.5	31290.9	27258.3	147091	125761	27479.8	5337.76	4911.09	4561.82	5229.67
M_1053	MFCD00266981	C18 H11 N O3	289.074	8.41	17485.8	16568.4	17197.8	17158.7	17649.6	16929.6	16800.2	17259.4	17564.5	17801.3	17621	16605.9	13580.4	15874.4	10626.1	14586.5	13191.7
M_1054	Hexyl N-(methoxycarbonyl)methioninate	C13 H25 N O4 S	291.15	8.277	30621.3	8613.61	13543.2	7246.41	10651.9	11018.5	13024.3	6727.73	11296.8	6766.82	15094.9	13466.4	7716.46	334221	64657.1	164107	118377
M_1055	D-Sphingosine	C18 H37 N O2	299.282	7.998	188453	333785	163802	109114	74710.7	86797.5	121694	102808	43506.6	66571.1	109480	103643	38640.2	27140.4	70110	23655.6	36602.6
M_1056	L-Histidine	C6 H9 N3 O2	155.07	1.015	73603.5	56902.7	7688.12	104400	78815.4	77683.2	95359.3	57129.2	63686.1	90611.3	64902.9	171899	56883.8	34229.1	193798	333427	53080.1
M_1057	1,8-Diazabicyclo[5.4.0]undec-7-ene	C9 H16 N2	152.131	1.502	22273.5	22143.9	23916.6	24281.8	26142.9	21891.7	5260.87	21180.5	21708.8	24625.9	21097.2	30747	25050.8	33947.1	22141.6	27045.2	28179.2
M_1058	L-(+)-Aspartic acid	C4 H7 N O4	133.038	1.116	168669	126692	104186	160090	193497	176217	332310	257447	250389	119032	162402	184367	208148	93494.9	280848	69128.5	130985
M_1059	DO0750000	C15 H24 O2	236.178	9.096	25112.4	67355.7	23772.2	56461	39898.1	42744.5	95978.6	100221	24974.3	60484.9	24730.9	75439.8	28312.5	180913	184043	145328	288011
M_1060	Methyl [(1-methyl-1H-tetrazol-5-yl)sulfonyl]acetate	C5 H8 N4 O4 S	220.026	2.508	22830.7	21911.6	29926.5	20122.4	18079.7	14858.9	38559.1	23109.7	57374.8	44787.8	35499.8	28851.8	46883.8	329779	36430.3	36843.6	26478.8
M_1061	N.pi.-Methyl-L-histidine	C7 H11 N3 O2	169.085	0.969	73997.2	57943.9	60740	112943	272296	232226	122059	122509	141833	242565	146345	93498.6	93813.8	196595	120373	142758	281906
M_1062	Triethylamine	C6 H15 N	101.121	0.73	273208	265960	197084	151218	320971	252388	262410	319185	167214	157674	192507	329714	195764	147582	258486	222477	220386
M_1063	Avocadyne 1-acetate	C19 H34 O4	348.228	8.914	53934.4	71039.9	24577.6	329029	62436.5	53988.6	46398.2	20821.9	57565.3	31158.4	17038.8	32683.5	66209.3	59618.7	13203.2	5921.64	66750.7
M_1064	Heptyl (9Z)-12-hydroxy-9-octadecenoate	C25 H48 O3	396.361	10.376	23487.6	23713.4	21652.4	18473.1	18160.9	16226.1	17187.1	18139	19493.2	14659.3	14754.8	16393.6	13988.4	13783.6	16758.9	19702.6	13480.6
M_1065	Acetyl-L-carnitine	C9 H17 N O4	203.115	2.557	257835	326574	265422	252764	166167	242057	266817	235435	200555	231275	234674	185952	240792	266474	187455	145849	211443
M_1066	S-(4-Pentylphenyl) 4-(tetradecyloxy)benzenecarbothioate	C32 H48 O2 S	496.337	9.838	2091.31	254615	19558.4	12429.8	4100.1	26036.8	321811	3969.19	326107	9113.62	1665.29	212067	16838.3	88400.5	193104	243141	12621.6
M_1067	MFCD01318414	C8 H13 N O4	187.084	3.185	10195.1	27823.4	12500.4	41399.9	18972.6	17341.3	18049.8	20519	15593.3	12154	74319.9	12664.5	27184.2	326014	45076.6	58984.7	42806.4
M_1068	Docosahexaenoic acid	C22 H32 O2	328.24	9.198	42931.3	136642	50304.7	61730.8	58576.2	50504	94741.8	105962	82116	169373	53026.9	39630.8	55810.5	325278	278314	111780	303856
M_1069	Trigonelline	C7 H7 N O2	137.048	1.591	52837.7	21105.9	23877.8	25924.8	42896.7	73230.6	95008.9	44957.4	22290.7	27372.4	24364.1	73091.3	78376.9	324255	74407.6	167821	86500.4
M_1070	L-Alanyl-L-glutamine	C8 H15 N3 O4	217.106	1.572	3847.51	3670.63	7759.07	3974.3	4579.18	7996.22	4574.76	4275.16	2844.74	5298.33	3645.92	4895.38	5114.09	324067	23950.1	7122.43	32519.5
M_1071	Tretinoin	C20 H28 O2	300.209	9.205	317034	322478	176762	281270	179883	205149	238479	88536.5	238764	298671	151215	113537	197344	205243	156132	199075	232309
M_1072	1,11-Diamino-3,6,9-trioxaundecane	C8 H20 N2 O3	192.147	1.517	18823	5842.81	38198.1	21201.5	6549.71	43028.3	17627.3	5673.68	4478.57	12167.1	11058.2	36213.7	13969.5	181491	322091	57235.4	16798.6
M_1073	Avocadyne 1-acetate	C19 H34 O4	348.23	8.216	28534.3	78514.2	76923.9	31655	48459.6	82019.2	34270.1	43067.2	40576.4	69469.2	26454.8	33739.3	52565.4	321959	53964	65348.9	63001.4
M_1074	Uracil	C4 H4 N2 O2	112.028	1.4	96749.2	253442	175825	38072	137709	321437	181120	195476	142050	310347	268018	100122	253473	109914	116545	96152.6	240666
M_1075	N-(5-Fluorotricyclo[2.2.1.0~2,6~]hept-3-yl)acetamide	C9 H12 F N O	169.091	0.977	33199.9	2193.37	112303	46092.4	13094.4	38072.1	23130.9	32425.2	25511.4	27894.6	32930.5	88786.9	34307.4	321177	58698.7	56464.5	27036.4
M_1076	1-LAURYL GLYCERYL ETHER	C15 H32 O3	260.235	9.212	131325	40136.6	76179.9	147484	51954	288703	54947	273454	163450	49312.5	86850.4	320943	66161.2	76929.8	32939.7	226616	206992
M_1077	N,N'-Diheptyl-2-hydroxy-N,N'-dimethylmalonamide	C19 H38 N2 O3	342.288	8.715	57746	42840.2	47368.7	31673.6	49540.2	46595.1	44860.5	39359.4	320497	65378.1	53130.6	92053.8	53760	44472.5	47931.7	41517.7	37771.4
M_1078	4-Nitro-2,1,3-benzoxadiazole	C6 H3 N3 O3	165.018	0.795	319651	186155	255356	297077	66229.2	128532	75157.7	54764.5	30901.3	60554.3	66363.1	51641.6	52010.4	253375	131219	97372.8	225995
M_1079	(2Z,4E)-2-hydroxymuconic acid	C6 H6 O5	158.022	2.873	6952.83	2081.04	7994.05	1946.62	21180.2	44142	14145.6	1868.36	827.311	1895.74	1879.84	5800.78	809.769	318796	6882.37	17819.9	1591.68
M_1080	(13E)-1,11,16-Trihydroxy-16-methylprost-13-en-9-one	C21 H38 O4	354.277	9.045	317712	308925	316798	264606	193778	192603	185970	211571	242107	193901	208727	298128	176456	193702	243050	175105	191216
M_1081	4-Acetamidobenzoic acid	C9 H9 N O3	179.058	6.337	39310.3	14065.6	56339.6	12374.5	15627.2	34648.3	36126.6	3241.82	6300.66	8351.37	940.214	10645.2	14940.6	224563	161792	317564	81212.8
M_1082	negamycin	C9 H20 N4 O4	248.148	1.336	3896.85	23193.9	22379.8	19554.1	3782.41	309393	3183.22	8599.78	2222.64	3130.53	3008.88	4037.52	11123.4	317270	3584.58	51125.2	9427.18
M_1083	DL-Histidine	C6 H9 N3 O2	155.07	1.103	53979.5	154757	36541.1	34023.9	72137.7	68397.5	85861.5	192638	79315.7	66054.1	237905	200223	123421	211085	299364	317135	238043
M_1084	pentahomomethionine	C10 H21 N O2 S	219.129	6.33	64599.5	162605	30944.9	86983	63068.3	24619.9	52712.5	50630.3	88128.4	61647.1	142110	25862.6	111789	317093	62892.5	50503.6	87727.1
M_1085	Dihydroxyphenylglycine	C8 H9 N O4	183.053	4.926	308171	280236	316858	309721	19186.9	10096.7	18483.7	49215.4	48327.1	32838.6	30500.4	27479.1	25003.2	5361.32	5068.34	4700.62	8827.49
M_1086	4-Nitro-2H-benzimidazol-2-one	C7 H3 N3 O3	177.017	1.188	272660	205625	246824	114873	99250	143255	105223	99546.9	80192.4	159194	69888.4	128337	120735	316336	189294	120226	127890
M_1087	Propyl dibutylcarbamodithioate	C12 H25 N S2	247.142	1.136	139593	315826	106777	249553	38026.8	48015.3	92347.6	49404.3	43940.6	132508	160098	56095.6	110083	142526	26265	38341	65543.5
M_1088	Dimethyl N-octanoylglutamate	C15 H27 N O5	301.189	3.684	5212.44	4178.68	3578.69	28379.2	3300.26	5128.97	3884.85	5341.08	3467.66	5157.73	4462.34	3368.97	3592.69	315388	33846.9	27454.6	23198.9
M_1089	1-Methyl-4-(2-methyl-2H-tetrazol-5-yl)-1H-pyrazol-5-amine	C6 H9 N7	179.092	1.223	160311	127235	148929	141722	192101	102492	166674	165257	232469	201797	55081.9	268112	172193	68714	255441	78953.2	225828
M_1090	Imidocarb	C19 H20 N6 O	326.194	5.192	77535.7	287185	128533	162568	88192.4	87593.4	188275	191032	315304	78191.9	75990.7	121080	119329	66120.8	74771.3	91784.4	99668.8
M_1091	4-Nitrobenzoate	C7 H4 N O4	166.015	0.661	33575.7	7560.23	15224.6	37769	16907.5	117948	171890	131136	200160	5940.95	159688	9360.5	315069	211985	207172	55312.1	121817
M_1092	MFCD00055819	C5 H9 N3 O4	175.059	1.307	52609	34565.6	75423.3	30000.5	153780	110950	164768	139268	113118	241170	131873	170445	195686	197540	270048	94267.8	70614.9
M_1093	ACPC	C4 H7 N O2	101.048	1.23	171062	121252	193694	149511	139500	155616	276075	142102	130368	81392.8	145837	202283	159319	153281	65930.6	312374	206089
M_1094	2,3-Dihydroxypropyl 3-sulfanylpropanoate	C6 H12 O4 S	180.046	1.633	199885	301870	311929	295269	219147	181716	113587	185979	202096	245124	152637	124926	175623	96223.6	126100	118667	97038.9
M_1095	1,2-di-O-methyl-4-[(2R)-2,4-dihydrobutyramido]-4,6-dideoxy-alpha-D-mannopyranoside	C12 H23 N O7	293.147	2.302	31220	98500.8	140370	8352.58	44632.5	145694	99648.2	70096.9	23343.4	40143.3	49089.4	90296.2	76395.2	311154	86630.6	111745	51706.4
M_1096	2,2'-(Dodecanoylimino)diacetic acid	C16 H29 N O5	315.205	2.939	103053	223662	209477	118994	126219	226202	233936	210995	171909	202578	229227	235349	245974	255123	209571	167418	257274
M_1097	3-Oxoestra-4,9,11-trien-17-yl acetate	C20 H24 O3	312.173	8.363	4187.12	9654.95	4659.58	5341.15	5830.12	10161.6	13972.5	5227.17	8220.31	4989.64	8456.79	6866.61	3711.34	309001	53332.2	186137	266160
M_1098	Norepinephrine sulfate	C8 H11 N O6 S	249.031	5.33	126112	68486.4	145416	54083.2	96156	130609	122474	24636.9	30716.4	76884	70973.2	116621	131878	79691.8	120076	272534	145498
M_1099	Diphenyl sulfone	C12 H10 O2 S	218.04	1.206	263205	144185	124103	243253	113458	148232	120539	114017	114179	149184	306042	140392	202663	128926	163132	166309	233400
M_1100	Octahydro-1,2,8-indolizinetriol	C8 H15 N O3	173.105	5.274	42640.7	34147.3	39941	50126.7	305503	104167	256873	39126.4	61539.9	105139	84017.6	61892.4	65532	64986.3	67134.4	91752.1	88411.2
M_1101	Nicotinamide	C6 H6 N2 O	122.048	1.808	228787	305059	251279	245953	127228	162823	146475	159108	133223	146761	142338	102202	119814	81901.7	93118.1	62351.8	80487.7
M_1102	methyprylon	C10 H17 N O2	183.126	7.884	58158.7	59125.5	56337.4	65902.8	213732	304688	261102	103583	85834.6	172300	124420	86322.1	80665.7	51086	45001.3	36257.5	39628.1
M_1103	{[(2,5-Dioxo-1-pyrrolidinyl)oxy]carbonyl}oxidanide	C5 H4 N O5	158.009	1.411	71820.1	111514	77445.7	103501	10250.7	54188.5	29133.9	22211.1	20431.3	16103.3	16934.2	11934.4	35576	303339	20728.8	13418.4	15941.9
M_1104	tert-Butyl 3-[(methylsulfonyl)oxy]-1-piperidinecarboxylate	C11 H21 N O5 S	279.114	6.877	2455.55	2438.6	2329.6	2302.18	2425.5	2496.77	2515.05	2461.07	2456.17	2101.25	2482.97	2391.65	2303.46	302720	35270.2	121992	44602.6
M_1105	4-Pteridinol	C6 H4 N4 O	148.039	1.499	128295	100346	302492	259086	210013	282552	139512	131609	84453.5	78967.3	112837	177117	150796	203254	129828	101747	59647.5
M_1106	5-[(3-Methoxyphenoxy)methyl]-2-furoic acid	C13 H12 O5	248.068	6.769	71280.7	84246.9	95167.9	76387.3	61768.5	64613.3	61182.4	13145.8	22818.1	26336.7	106827	36888.2	80286.9	94602.1	48791.3	136606	300451
M_1107	3-[Dodecyl(2-hydroxyethyl)amino]-1,2-propanediol	C17 H37 N O3	303.277	7.818	7768.33	10437.4	2982.95	13646.5	298670	7512.92	248187	9598.79	7458	6383.45	3137.29	7444.73	1948.11	2398.39	1920.07	2022.32	2246.88
M_1108	Nevirapine	C15 H14 N4 O	234.087	7.073	17799.1	18993.8	16307.6	21722.7	19838.7	9830.53	21780.1	8361.96	21142.4	14388.7	23310.4	22473.6	5102.25	11691.7	13703.7	298648	17843.9
M_1109	Norepinephrine sulfate	C8 H11 N O6 S	249.031	2.43	188659	173669	251582	159307	143405	210646	182419	176546	144781	150276	117541	207833	94436.8	298340	187729	259971	152852
M_1110	1,11-Diamino-3,6,9-trioxaundecane	C8 H20 N2 O3	192.147	1.376	4777.22	5842.81	3226.25	12363.2	4575.16	17805	6445.26	4275.24	3898.24	12352.9	9385.17	14634.2	13084	37291.7	298310	4351.69	48319.4
M_1111	2-Ethoxy-4-hydrazino-6-(1-piperidinyl)-1,3,5-triazine	C10 H18 N6 O	238.154	8.784	20405.5	114934	40239.3	43018.9	33401.1	37804.8	77826.8	67350	115289	298094	45852.6	66593.8	58508.4	70127.2	65675.5	22314.9	46291.8
M_1112	Aceturic acid	C4 H7 N O3	117.043	1.478	10295.5	16428	11020.9	69697.6	7594.77	95448.5	170860	131971	125392	148464	297765	34574.6	19250.6	20902.7	29692.4	134151	15165.5
M_1113	MFCD00674100	C7 H7 N3 O2	165.054	0.793	297712	194629	213874	195445	65903.8	124539	79455.5	52925.2	34004.7	58413	65577.2	63669.8	52641.1	230417	103458	72820	162689
M_1114	3,6-Difluoro-2-methoxyphenol	C7 H6 F2 O2	160.033	0.786	262517	195905	266709	262646	102187	177430	111182	84757.4	50624.5	91865.8	111687	75702.6	83289.1	144491	285458	59156.8	297499
M_1115	AC-VAL-OH	C7 H13 N O3	159.09	4.28	39434.8	31042.9	31196.5	28203.5	26399.7	25919.8	28461.3	22043.5	21954.5	26596.8	30765.2	26437.4	34027	297306	26249.8	24808.7	29531
M_1116	Cyclamic acid	C6 H13 N O3 S	179.062	1.467	75958.1	86404.2	82840.1	159699	222047	158318	297192	99864.6	59446.6	98869	110919	193394	77126.5	44515.4	68904.7	149636	48299.6
M_1117	2-[Bis(2-chloroethyl)amino]ethanol	C6 H13 Cl2 N O	185.038	1.211	105721	131187	125903	201269	186838	248213	152618	128673	220113	182721	256536	210719	150478	38770.2	66485.1	296323	45343.7
M_1118	Gly-Leu	C8 H16 N2 O3	188.116	1.193	69165.3	89701.8	113827	103408	82191.6	103035	76912.3	86399.4	88227.7	59317.2	59669.7	90968.8	80129.9	295869	154053	137894	141889
M_1119	MFCD00083078	C22 H45 N O3	371.34	9	117380	174303	295778	222049	124723	283933	132895	124947	101809	40539.9	133116	61140.6	104776	118832	162236	108917	184814
M_1120	Guanylmelamine	C4 H8 N8	168.087	1.286	49918	43857.8	106812	77681.9	60400.3	88343.1	39114.7	30432.9	25386.3	49760.2	55795.5	56173.7	25366.4	293649	75241.8	52377.3	31020
M_1121	Leu-Val	C11 H22 N2 O3	230.163	8.011	5696.67	5612.82	5711.65	293196	5282.87	5446.58	5558.6	5289.99	5294.95	5625.79	5588.49	5316.62	4261.52	4759.3	3997.69	4222.67	4382.89
M_1122	2,2'-Thiobis(3,6-dicyclopentyl-p-cresol)	C34 H46 O2 S	518.321	9.599	142506	247932	154915	93138.5	234369	190098	243858	213278	150864	246761	175208	216378	213256	17731.9	189218	157380	292975
M_1123	Gly-Lys	C8 H17 N3 O3	203.127	1.307	4542.57	4800.2	5341.07	4627.03	4455.04	5037.52	6738	4019.44	4052.12	3964.18	4251.2	4407.43	5913.35	290941	9821.88	74264.4	21329.6
M_1124	NPPB	C16 H16 N2 O4	300.111	7.757	41451.3	86571.3	41736.3	88884.2	114108	31346.8	94398	199332	290281	249920	270000	156051	173107	11076.7	14056.1	9084.6	8349.58
M_1125	7-Methylguanosine	C11 H15 N5 O5	297.107	2.741	34226.5	49493.6	67632.6	46347.4	32245	39931.3	69202.4	37148.1	31817.5	57770.8	60207.7	33014.3	61514.6	289911	107417	183872	192725
M_1126	2-Oxindole	C8 H7 N O	133.053	6.733	95133.6	15289.4	202984	200639	54471.8	160722	86982.2	12489.5	2234.69	23047	79001.8	42751.9	107040	67823.2	17732.5	70320	289570
M_1127	Pipecolic acid	C6 H11 N O2	129.079	0.939	87763.1	62508.7	289394	35033.1	122604	101716	95984.4	82797.4	83339.9	96060.2	114402	109055	169411	277379	133198	41900.5	109247
M_1128	N-Acetylanthranilic acid	C9 H9 N O3	179.058	7.711	288716	136626	171319	61025.1	20885.6	31331.2	18884.6	29497.8	53895.2	42185.2	49011.9	61575.8	27609.8	21860.5	8012.78	8225.59	11142.3
M_1129	OB4520000	C10 H9 N O	159.068	1.642	95911.4	82149.4	113545	5978.29	80749.4	89734.2	56033.5	38065.9	16688.2	64819.5	49229.5	42264.2	76008.1	288392	72279.9	18654.1	86527.3
M_1130	2-Amino-2-propanyl	C3 H8 N	58.0659	1.422	66553.1	56717.1	85153.3	120984	36428.8	125570	112015	288281	183924	88362.3	162059	149401	98696.4	60587.5	41027.7	59492.8	32975.6
M_1131	5'-S-Methyl-5'-thioadenosine	C11 H15 N5 O3 S	297.09	3.728	124085	109074	168195	27443.7	65070.3	57852.8	82795.5	64183.3	78132.3	77644.3	81558.6	45602.1	77379.6	200235	140230	206252	154385
M_1132	MA4000000	C5 H7 N O2	113.048	1.648	116854	125244	7642.81	104525	115219	141560	6966.5	5387.58	17271	26169.9	130996	150939	122845	286285	181160	210324	85746.1
M_1133	Cyclo(leucylprolyl)	C11 H18 N2 O2	210.137	6.834	58585	32575.4	151236	60754.2	96614.6	187367	101277	55919.5	11509.9	21944.8	55075.7	286056	48733.6	22252.4	39859.7	53506.6	47888.9
M_1134	Amide C18	C18 H37 N O	283.287	10.515	1461.48	2367.97	46068.8	1136.11	148444	2359.47	449.938	557.131	1032.23	285832	459.601	424.324	443.31	406.502	701.184	453.301	338.328
M_1135	Indane	C9 H10	118.079	8.68	129237	285490	151803	148027	207033	167098	153679	201487	157439	171949	143939	130281	142671	170121	185220	279935	131881
M_1136	Methyl 5-chloro-1H-pyrrole-2-carboxylate	C6 H6 Cl N O2	159.009	0.687	3436.86	126149	150530	140270	99506.3	217152	152174	99074.9	94783.2	227305	117139	160565	143269	115852	142019	7969.63	121226
M_1137	2-Amino-N-(3-aminopropyl)-4-oxo-4,7-dihydro-1H-pyrrolo[2,3-d]pyrimidine-5-carboxamide	C10 H14 N6 O2	250.118	11.104	37371.5	43547.6	9539.48	42758.9	47711.3	48600.3	42249	12661.8	35602.5	37264.3	44850.9	45561.4	44411.5	285042	46888.3	41760.2	42824.3
M_1138	Fludrocortisone acetate	C23 H31 F O6	422.213	5.323	9863.28	66307.3	20352.8	67352.2	2822.73	3037.32	7882.44	104464	284706	2841.51	2886.37	2942.84	2991.26	4734.42	3006.31	3276.32	3173.23
M_1139	2,2'-(Dodecanoylimino)diacetic acid	C16 H29 N O5	315.204	9.055	36313.9	66447.9	25625.1	284374	23314.1	4006.91	25034.5	26606.9	20998.5	35121.2	35561.5	21779.1	27850.2	10576.6	12918.2	12388.6	28418.8
M_1140	Boc-Phe(4-NO2)-OH	C14 H18 N2 O6	310.118	1.549	63363.3	189832	80776.1	7577.37	228558	184613	259397	141727	109450	189290	199746	131134	175933	201885	284364	13576.6	142331
M_1141	MFCD00083078	C22 H45 N O3	371.34	9.136	143256	279041	258968	214063	135160	284147	116508	124813	96458.2	38707.4	151738	67221.9	137624	125332	155049	133799	202485
M_1142	4'-Dimethylamino-3,4,5-Trimethoxy Benzanilide	C18 H22 N2 O4	330.158	2.435	54772.2	52010.5	91756.3	24310.7	60580.3	80540.4	64656.6	22106.1	17782.3	42748.2	21399.1	65812.7	36616.7	191279	62871.9	284027	76019.3
M_1143	18-acetoxy-1alpha,25-dihydroxyvitamin D3	C29 H46 O5	474.335	8.719	24047.1	20796.3	18341.6	13858.4	15836.2	18192	15480.1	17672.8	18149.3	19085.9	16818.7	17469.6	14897.3	85327.4	49605.1	74490.9	283249
M_1144	(+/-)12-HpETE	C20 H32 O4	318.219	8.89	115668	99455.7	102236	68599.4	32174	80468.4	67365.4	44703.3	36612.7	73564.9	31134.5	65286.3	32091.2	221993	282797	124951	228415
M_1145	FAB-144	C20 H27 F N2 O	330.217	9.425	30208.4	18995	9829.42	282744	10291.4	3476.94	3564.92	11006.1	33375	26519.9	8065.67	18392.6	31438.5	6907.31	7357.72	3320.75	13962.4
M_1146	Linoleyl alcohol	C18 H34 O	266.261	10.467	233039	281610	263749	205530	161214	133437	173099	242364	223220	184501	161534	175369	132402	139061	170329	168625	111763
M_1147	1-stearoyl-sn-glycero-3-phosphoethanolamine	C23 H48 N O7 P	481.317	9.843	97826.7	70200.2	144624	170132	70494.1	67032.8	48391.9	68788.1	85656.5	90877.3	111916	108289	75465.8	102965	148376	281315	256821
M_1148	MFCD00025173	C18 H31 N O	277.241	8.78	3554.79	3383	3256.33	3117	281249	28671.9	239575	3111.53	3165.67	3137.32	5654.62	3533.09	3038.26	2834.66	3153.65	3010.61	3231.33
M_1149	Avocadyne 1-acetate	C19 H34 O4	316.204	8.25	19235.4	30362.7	31953	14654.8	34020.4	29449.2	68590.6	61469.7	43745	25541.5	25695.7	20913.5	20297.8	66131.4	166182	49565	47148.6
M_1150	Xanthurenic acid	C10 H7 N O4	205.037	5.034	8639.1	8726.44	8357.18	8351.06	9878.96	14742.5	16631.5	8256.32	6177.26	13102.5	15995.6	8756.83	12444	106064	21798	21244.5	41721
M_1151	CAPROYL SARCOSINE	C13 H25 N O3	243.183	7.563	12267.9	3200.54	11328.2	279536	5033.26	6793.29	6231.06	5421.95	8228.05	4138.83	1760.89	8268.4	3246.55	1344.46	1207.53	1008.72	1101.88
M_1152	Valerophenone	C11 H14 O	162.105	8.232	119469	128219	118472	170015	256366	220560	112781	249460	278986	192289	222705	229897	115344	102065	65761	87322.8	88041.2
M_1153	1-(tert-Butylamino)-3-((5,6,7,8-tetrahydro-cis-6,7-dihydroxy-1-naphthyl)oxy)-2-propanol	C17 H27 N O4	309.194	7.096	2126.69	2045.08	1933.77	1996.46	1891.64	1934.86	1893.23	1903.87	1978.33	1607.07	1871.16	1920.67	1366.18	182704	106443	163229	162734
M_1154	1,5-Dihydroimidazo[4,5-c][1,2,6]thiadiazin-4(3H)-one 2,2-dioxide	C4 H4 N4 O3 S	188	1.995	197670	215008	218313	248153	100588	200320	191269	113879	97868.4	200433	224553	180842	278708	222467	126068	148722	164735
M_1155	Phosphorazidothioic difluoride	F2 N3 P S	142.952	0.628	278011	275469	47757.7	185249	157305	7481.38	8770.69	45298.2	84837.8	255223	21978.7	65753.7	94364.7	55793.6	75616	200086	18697.8
M_1156	MFCD05664229	C13 H14 O2 S	234.071	1.16	170240	132755	250795	276893	121119	225459	190408	214524	203355	172801	218343	199238	71365.3	7752.59	102226	225678	41426.3
M_1157	Boc-Gln-Oh	C10 H18 N2 O5	246.121	2.415	128527	97346.5	89093.4	65180.2	32173.9	51557.5	184511	57127.4	30402.5	86131.6	55675.9	30709.2	46715.6	275854	97738.9	61930.4	87130.9
M_1158	2-Indolylformic acid	C9 H7 N O2	161.048	6.495	20316.5	9651.79	23259.5	14468.1	27159.3	20664.7	21923.3	13596.3	7155.13	12874.9	10603.5	21936.6	18731.9	275331	56027.3	121883	56791.6
M_1159	Palmitoyl ethanolamide	C18 H37 N O2	299.282	9.686	100454	275263	63322.2	30346.5	71639.4	43693.8	69200.5	70807.6	34786.9	20450.5	26330.1	26295.5	28862.2	6393.89	15766.9	10861.8	18947.5
M_1160	4,6-Bis(dimethylamino)-1,3,5-triazin-2-yl(methoxymethyl)cyanamide	C10 H17 N7 O	251.15	8.112	94945.9	93633.6	108030	122014	148653	274299	107644	81222.2	73585.3	147126	131069	108383	100113	62083.4	96925.5	50487.8	54174.6
M_1161	2-amino-3-(((R)-2-amino-2-carboxyethyl)disulfanyl)propanoic acid	C6 H12 N2 O4 S2	240.024	1.107	22535.8	21259.3	25839.6	26285.1	147648	183068	59177	76950.2	67447.1	100455	71288.8	82282.3	124019	274287	13956.6	75841.6	16777.9
M_1162	tranexamic acid	C8 H15 N O2	157.11	3.794	70171.7	67888.8	104318	84340.7	274179	180864	125493	201680	221589	186947	151493	216543	224934	180212	143641	209283	130456
M_1163	L-(-)-Asparagine	C4 H8 N2 O3	132.054	1.224	167073	38986.7	258982	158388	225987	151312	251873	108774	136965	107164	110865	83539.7	177509	260471	132220	125258	181094
M_1164	N-[(3-nitrophenyl)methylideneamino]-4-oxo-1H-quinazoline-2-carboxamide	C16 H11 N5 O4	337.08	4.75	39106.1	31732.9	57688.3	41976.9	15275	33294	24219.2	26589.1	1879.1	57096.1	3743.57	1773.51	71727.2	273235	42680	187608	4210.91
M_1165	Rosoxacin	C17 H14 N2 O3	294.101	3.807	105540	43184.1	54762.3	272827	2371.9	2447.45	3075.47	3571.74	8915.55	2377.48	2399.14	2371.17	2527.48	2595.05	2394.69	2567.83	2501.22
M_1166	Diethylene glycol	C4 H10 O3	106.063	7.54	118009	90187.8	119928	78636.2	203542	124283	168471	101158	272576	88253	112553	139248	40327.2	36691.6	35277.6	52445.1	38343.7
M_1167	Propylparaben	C10 H12 O3	180.079	7.792	6666.27	32304	6686	6725.4	16258.9	118817	189228	81173.5	134718	125806	247953	272464	151741	25181.3	8184.43	16472.4	9169.99
M_1168	Disulfane, bis(2-diisopropylaminoethyl)-	C16 H36 N2 S2	320.233	8.642	20086	64693.9	17779.4	71434.5	43652.2	23196.6	86559.1	18637.3	4714.47	13642.8	14225.8	22054.1	16245.7	38236.8	33200.6	37667.4	49223.8
M_1169	N-Boc-3-Pyrrolidinone	C9 H15 N O3	185.105	7.282	58276.1	13315.3	45353.8	272320	8080.36	7404.61	16961.8	17248.3	10558.2	16039.3	14335.1	4494.23	11458.5	1761.16	13877.8	15309.2	12795.5
M_1170	1,3-diguanidino-2,4,5,6-cyclohexanetetrol	C8 H18 N6 O4	262.139	1.1	34800	272268	65786.1	55324.6	31641	22426.9	55600.7	174053	19734.2	12667.6	39933.4	54890.2	33459.4	61052.6	9007.59	9694.24	8278.57
M_1171	procodazole	C10 H10 N2 O2	190.074	1.191	43177.6	86955.2	94240.2	17964.5	187700	152244	149409	92954	116276	240857	125161	176911	240368	167379	225664	215832	191149
M_1172	3,4,5-Trifluorobenzonitrile	C7 H2 F3 N	157.014	1.078	266681	138592	270308	155369	60785.8	100152	72399.2	76985.7	62962.1	53261.4	55358.9	67488.2	72263.4	118656	51915.6	88521.7	58522.6
M_1173	Homocitric acid	C7 H10 O7	206.043	0.96	260399	211431	270241	160583	53948	78170.8	45116.1	67339.2	53860.5	60821	54098.3	113714	52635.4	236316	54610.9	58899.9	57866
M_1174	GSK-2816126	C31 H38 N6 O2	526.306	9.938	188108	198635	193013	145257	269674	260898	210748	181841	221971	239148	259061	267716	159783	78796.4	189376	256459	189365
M_1175	Tetrahydroisoquinoline-3-carboxylic acid	C10 H11 N O2	177.079	7.311	269592	95512.9	135596	59108.9	17436.7	30297	21882.3	16350.6	22372.1	7212.63	25082.5	22926.7	4369.13	15008.8	2630.09	4545.76	3047.35
M_1176	2050867	C12 H23 N O4	245.163	6.976	269548	28790	24993.5	29757	26041.2	81992	3639.36	3330.84	1552.75	20054.6	24003.9	3014.76	19718.2	17463.9	31839.3	19575.2	22809.6
M_1177	Di(2-ethylhexyl)adipate	C22 H40 O4	368.293	9.15	59525.1	53732.4	47036.4	21836.6	15163.4	36888.6	10148.5	10719.1	19282.1	48312.5	98196	54362.3	62788.8	9789.54	32749.3	173433	269297
M_1178	2-[(2R,4aS,6S,8aS)-6-(beta-D-Glucopyranosyloxy)-4a-methyl-8-methylenedecahydro-2-naphthalenyl]-2-propanyl beta-D-glucopyranoside	C27 H46 O12	562.297	9.518	61807	130425	10778	30301.6	160286	164163	164813	198793	134590	216627	94582.7	94083.6	158228	2527.51	103448	72956.8	269040
M_1179	2-(Amidinoamidino)Hydrazide Isonicotinic Acid	C8 H11 N7 O	221.103	7.974	5194.12	15073	2522.17	11748.8	2287.53	2449.83	2461.43	3068.5	2483.16	5646.56	6683.34	2487.36	951.28	156477	227207	80707.7	179660
M_1180	Hypotaurine	C2 H7 N O2 S	109.02	1.122	141751	267174	106613	67052.2	62629.1	88040.9	164694	177658	131607	86857	111484	126317	123514	36531.4	34345.9	16850.5	88275.5
M_1181	2-(Dicyclohexylamino)ethanol	C14 H27 N O	225.209	8.664	195667	161610	261572	156924	147307	162060	163852	182692	196533	266267	189734	139080	119190	117953	82397	190284	63401.7
M_1182	2-EHTG	C10 H20 O2 S	204.119	1.427	153114	201914	265867	250930	85343.1	138655	154095	59385.9	56111.8	132872	114519	98705.2	93603.1	233340	119218	42027.8	118991
M_1183	Methyl 2-[(2,2,3,3,4,4,4-heptafluorobutanoyl)oxy]docosanoate	C27 H45 F7 O4	566.318	9.634	265484	72304	101306	107688	104335	197830	227388	52723.8	141499	149947	99870	129060	82224.5	21651.9	35104.2	95966.5	105002
M_1184	3-[(3-Hydroxynonanoyl)oxy]-4-(trimethylammonio)butanoate	C16 H31 N O5	317.22	9.016	116751	2328.8	49036	265255	57510.5	59264.6	116954	102088	169622	148101	73212.8	36566.4	72631	206624	215819	32142	131860
M_1185	1-Allyl 2-pentadecyl 1,2-pyrrolidinedicarboxylate	C24 H43 N O4	409.319	9.156	48785.8	44266.9	39767	12823.2	3878.22	27288.2	5739.98	4174.97	13669.5	41573.7	92592.3	46167.3	45731.5	5779.1	29157.7	163802	263269
M_1186	Phosphocholine	C5 H14 N O4 P	183.065	9.662	104665	68809.9	58595.4	262603	95113.6	132481	68046.8	30644.6	63783.8	126381	54064.3	72076.7	65079.1	25568.7	49905.5	40677	72166.8
M_1187	6-Azabenzo(a)pyrene N-oxide	C19 H11 N O	269.084	2.127	52090.7	74995.4	26896.7	4691.51	4420.74	42827.4	26152.7	34482.2	101643	87974.1	51405.9	147703	210278	170404	81906.1	85682.6	262446
M_1188	N-{[(2-Methyl-2-propanyl)oxy]carbonyl}phenylalanyl-N-[(2E)-1-ethoxy-6-methyl-1-oxo-2-hepten-4-yl]alaninamide	C27 H41 N3 O6	503.299	9.972	129359	130953	104810	132147	125746	133166	105253	98510.7	8206.68	74614.3	142898	159274	90000	40645.5	135625	262237	115805
M_1189	Rhodamine 6G	C28 H30 N2 O3	442.225	7.692	610.169	463.61	475.365	468.049	5295.92	446.512	1364	92812	433.052	9757.92	29204.6	1026.94	17327.1	3686.39	34437.5	13538.7	261746
M_1190	α-Aspartylphenylalanine	C13 H16 N2 O5	280.106	4.337	3517.89	3676.65	2951.69	3391.91	3211.76	2931.66	2694.29	10591.4	2843.29	4639.69	3894.68	2839.85	2774.12	261652	21114.3	16088.6	9170.3
M_1191	1,4-Dinitrotetrahydroimidazo[4,5-d]imidazole-2,5(1H,3H)-dione	C4 H4 N6 O6	232.019	1.401	45398.3	187377	77410.4	55098.5	57073.8	41939.7	74719.3	163715	261260	71419.8	137587	87482	70869.1	19651.8	26184.2	29057.2	26522.9
M_1192	3-Phosphonopropanoic acid	C3 H7 O5 P	154.003	1.78	77596.4	28216.2	39571.6	84040.6	71470.5	93254.5	98044.7	94606.7	123755	85362.2	115665	77299.9	84766.6	61649.2	261187	40369.8	97949.6
M_1193	1-Linoleoyl-sn-glycero-3-phosphocholine	C26 H50 N O7 P	519.334	9.589	9674.7	59460.1	77692.3	260766	57225.3	42706.7	53798.9	4547.35	20784.3	55077.1	5717.14	10346.3	38655.9	10484.3	51575.5	4080.17	12275.4
M_1194	N-Palmitoyl-L-serine	C19 H37 N O4	343.272	7.914	93556.9	197901	90867.8	100908	94936.8	93149.3	158871	117814	148177	260419	229062	108334	131913	257286	57719.4	23301.9	74934.6
M_1195	2-O-{(2E)-3-[4-(beta-D-Glucopyranosyloxy)-3-methoxyphenyl]-2-propenoyl}-1-O-[(3beta,5xi,9xi,16alpha)-3-(beta-D-glucopyranuronosyloxy)-16-hydroxy-28-oxoolean-12-en-28-yl]-alpha-L-arabinopyranose	C57 H82 O22	1118.53	4.014	259634	16691.9	37140.6	50389.7	9982.38	10640.5	10389.6	10031.5	10511.2	10480.6	10452.9	10349.6	10454.2	11028	10694.8	10529.8	10916.5
M_1196	Spirosolane-3,7,11-triol	C27 H45 N O4	447.335	8.249	129245	164933	103788	83991.1	69031.9	53825.3	112630	93326.7	108688	150719	90101.5	75766.1	76229.7	259333	83898.5	70260.7	122133
M_1197	3,4-Diethoxyphenylacetic acid	C12 H16 O4	224.104	7.764	10231	9250.59	10959.1	11118.2	78892.7	259100	65294.4	46026	73473.6	79491.8	100078	93193.9	60923.8	2369.26	1895.57	1784.54	4880.91
M_1198	ethylestrenol	C20 H32 O	288.245	9.666	132119	212114	162967	166839	160643	199858	106314	147434	217712	171929	126607	122538	150613	170457	62145.4	258569	173143
M_1199	trimethadione	C6 H9 N O3	143.058	2.588	125337	56288.3	65938.9	60340.6	82481.8	79117	107772	117742	34414.9	57702	71209.5	71838.5	127306	258257	48810.3	55221.5	33607
M_1200	4-Nitrobenzyl (5-phenyl-2H-tetrazol-2-yl)acetate	C16 H13 N5 O4	339.095	6.375	61297.1	56562.1	92536	40178.6	38122.9	54146.4	21833.3	15323	11581.5	27050.5	5114.21	5607.56	25609.9	160928	52453.5	258218	8722.61
M_1201	[Amino(4-hydroxyphenyl)methyl]phosphonic acid	C7 H10 N O4 P	203.035	2.438	119200	139485	257732	87220.9	42940.4	116719	53388.1	28112.4	25500.6	56416.9	30032.9	72426.4	38332.4	21437.8	38770.7	96822.9	33500.9
M_1202	Imidocarb	C19 H20 N6 O	348.176	5.187	59866.7	224713	101064	128674	68915.7	74375	144686	149310	256844	68382.5	66870.8	90723.6	95170.5	61298.4	65973.8	75853.9	88739.7
M_1203	Succinyladenosine	C14 H17 N5 O8	383.108	4.195	24358.3	107085	36451.9	43046.7	66136.2	83353.4	133912	114363	48296.7	111319	137514	94361.4	72429	256774	137231	70137.4	171924
M_1204	Dihydrothymine	C5 H8 N2 O2	128.059	2.029	168619	131403	121007	101722	54101.9	145042	111165	90493.9	43510.4	88064.1	217121	89839.8	115269	252959	103097	198724	256247
M_1205	2,5-Dioxo-2,5-dihydro-1H-pyrrole-3,4-dicarbonitrile	C6 H N3 O2	147.007	0.789	255922	160490	199200	229188	57272.1	112335	58190.1	41228.3	23294.7	44606.6	53149	41724.4	41839.9	173101	104377	83433.3	179559
M_1206	MFCD00091818	C7 H5 N3 O3	179.033	0.791	255378	171428	173778	173940	57667.4	79635.7	59233	38071.9	16258	33927	43038.4	23834.6	33935.5	103062	84107.1	66629.3	114731
M_1207	(1-Hydroxy-4-oxido-2,3,5,7a-tetrahydro-1H-pyrrolizin-7-yl)methyl 2,3-dihydroxy-2-isopropylbutanoate	C15 H25 N O6	315.168	8.971	1586.36	2026.45	2254.98	8041.16	1032.07	1965.79	2815.37	763.899	1906.41	1254.78	1472.85	1844.24	713.21	255329	819.683	2151.53	1503.01
M_1208	(+/-)-cis-3-Methyl thiofentanyl	C21 H28 N2 O S	356.196	8.967	8314.75	9666.37	3366.78	7561.14	3239.04	8976.9	3078.62	3575.85	3476.3	8032.3	3227.94	3700.44	4440.39	254982	10560.2	18670	19973.6
M_1209	N~6~-Cycloheptyl-N~2~-phenyl-7H-purine-2,6-diamine	C18 H22 N6	322.191	9.207	254847	176509	106755	157588	86386.1	108830	91905.3	53205.5	140884	39362.5	63798.2	57978.1	102181	96921.2	69784.9	100426	120448
M_1210	Nitrosoiminodiacetic acid	C4 H6 N2 O5	162.027	4.198	56379.8	127424	64162.1	29015.4	27902	34301.7	46603.5	33809.6	31193.1	45395.9	38784.8	23520.5	31494.3	254214	90127.7	119361	79526.3
M_1211	(E)-Dacarbazine	C6 H10 N6 O	182.092	4.571	52836.3	52460	73667.1	50278	49552.1	40920	43261.5	253696	106409	45269	96126.1	84056.8	60143.1	46979.6	57257.1	16965.3	163238
M_1212	5-Hydroxy-DL-tryptophan	C11 H12 N2 O3	220.085	1.996	29803.4	69196.7	38786.7	38730	76152.4	36645.3	47241.9	41313.4	53831.6	47052.8	49804.3	38864.3	39601.3	151900	47892.7	80786.3	58278.7
M_1213	Corticosterone	C21 H30 O4	346.212	9.03	21798.5	25013.8	30582.2	252175	15029.4	10962.8	9768.18	11016.1	34954.9	23252	18304.5	32060.8	16518	38827.2	18597.5	21801.1	8268.66
M_1214	PTA	C6 H12 N3 P	157.077	3.425	93249	125346	89583.6	130850	230721	166234	184597	210011	179694	190086	161767	150132	183935	251802	175839	175041	158147
M_1215	N,N'-[(2-Bromo-1,3-phenylene)bis(methylene)]bis(N-cyclohexylcyclohexanamine)	C32 H51 Br N2	542.321	9.513	28152.2	148180	229472	39861.6	234952	145664	154993	160561	147951	162777	88443.2	64656.8	151135	9905.3	124245	59039.1	251580
M_1216	MFCD00005448	C9 H9 N O6 S	259.016	7.471	7533.91	5800.41	23775.5	6414.32	18169.1	50842.5	14577.7	5079.2	5411.19	17523.5	22482.2	47724.1	7419.81	15318.4	14688.2	17660.3	13863
M_1217	gaboxadol	C6 H8 N2 O2	140.058	1.121	131990	11864.9	250236	248810	206712	212481	194066	239540	221730	147378	206810	193132	163829	217084	137700	226386	41904.9
M_1218	Gly-Lys	C8 H17 N3 O3	203.127	1.418	2726.1	2843.3	2222.74	2035.18	16015.8	7573.65	8787.64	10311.9	5240.17	17528.7	6226.01	3405.45	10564.7	248991	78323.6	67430.2	22613.3
M_1219	Dodecyl N-[(allyloxy)carbonyl]alaninate	C19 H35 N O4	341.257	7.776	69889.7	138607	54658.1	39231.7	75738.5	52785.4	143176	71814	121337	248951	204985	98555.1	102528	235536	60543.8	47131.2	83253.1
M_1220	MFCD20642996	C3 H4 O6 S	167.973	0.635	42520.2	54421.7	3227.81	6773.07	18137.4	11097.9	35733	15125.4	33621.9	14429.5	18929.9	4289.56	2992.65	77104.6	8983.01	15635.2	44652.1
M_1221	Bis(2-aminoethyl) hydrogen phosphate	C4 H13 N2 O4 P	184.061	0.976	247875	93152.1	214127	81881.1	4026.59	37779.9	19615.8	21996.1	23645	7107.66	24543.6	70662.5	24632.3	246882	29023.1	20446.6	24210.6
M_1222	4-tert-Butylphenylacetic acid	C12 H16 O2	192.115	8.176	3887.81	31649.9	18346.2	245981	38449.3	3846.64	30789.7	35271.7	46035.4	41919.3	57139.6	40140.3	43012.4	30426.5	6708.71	31851	30827.5
M_1223	EK5700000	C8 H18 O S	162.108	1.438	97004.5	111937	124454	124644	140059	173827	149918	109335	97444.9	116197	96569.8	141424	117782	69958.5	123746	105134	218445
M_1224	1-Boc-4-piperidinol	C10 H19 N O3	201.136	7.569	71542.2	56919.4	69974.1	88811.1	232144	245794	182203	78356.2	85867.4	189117	118681	78607.3	36999.6	55095.2	51739	46041.8	42996.4
M_1225	1-[(8Z,11Z,14Z)-icosatrienoyl]-sn-glycero-3-phosphocholine	C28 H52 N O7 P	545.346	9.876	87284.2	20561.7	27487.2	245449	44825.7	62406.7	46901.8	87076.1	93838.4	72881.5	50537.5	82535.3	37058.9	1572.31	23361.6	13507.4	30603.4
M_1226	(2-PHENYL-1,3-THIAZOL-4-YL)METHANOL	C10 H9 N O S	191.04	4.026	5551.35	5436.62	10106.5	6109.96	33687.6	23733.8	74933.5	40508.8	77555.3	99278.9	245404	137660	61709.2	5468.82	6721.65	5091.78	16303.8
M_1227	1-(Phenylthioxomethyl)piperidine	C12 H15 N S	205.093	3.304	324.858	419.546	991.678	327.724	286.134	939.417	19699	345.734	302.144	297.221	4848.73	463.328	7461.35	393.887	328.645	26902.8	342.432
M_1228	Batrachotoxin	C31 H42 N2 O6	538.307	9.666	164721	90326.8	53224.5	244708	78142.9	79053.3	77955	50760.6	69495.6	71381.6	70048.9	74928.6	54692.1	7661.28	30045.8	41656.5	79829.2
M_1229	Benzoxazole	C7 H5 N O	119.037	7.711	244207	115548	128831	46716.4	14927.3	32024.2	18954.4	17492.8	60476.9	39836.9	43700.9	66377.1	28870.8	22575.4	4088.76	4572.67	9081.43
M_1230	Tanaproget	C16 H15 N3 O S	297.094	1.161	37594.7	14062.2	62668.6	17540.7	111603	179533	142202	53064.3	95467	89326.9	84190.5	181948	132003	96879.3	109976	138693	243656
M_1231	1,3-Adamantanediacetic acid	C14 H20 O4	252.135	8.766	8105.61	105464	12260.1	4186.47	170428	123783	182687	193966	155068	134787	154960	207744	103163	70910.6	143638	20215.2	143720
M_1232	Adenine	C5 H5 N5	135.055	0.6	2489.05	8359.76	1498.01	12172.1	4531.89	5930.37	5357.97	2218.97	1149.49	11616.5	9645.81	10931.4	7556.88	7511.94	5214.89	18142.5	4223.41
M_1233	Dimethyl N-octanoylglutamate	C15 H27 N O5	301.189	3.895	6053.03	17558.1	5863.51	8542.02	11363.8	5944.01	8438.18	4736.29	8638.93	10281	10079.4	5243.88	16401.4	242091	41832.5	50529.3	25559.4
M_1234	Methyl N-{[(2-methyl-2-propanyl)oxy]carbonyl}alanylvalinate	C14 H26 N2 O5	302.184	8.02	12277.7	12145.2	12359	241858	11322	11785.4	12027.8	11446.6	11457.3	12157.5	12002.8	11482.5	9221.18	10261.5	8006.17	9137.1	9254.66
M_1235	Guvacine	C6 H9 N O2	127.064	1.235	97179.3	101484	145627	91665.5	45786.9	104334	15495.3	48373.2	62960.4	55438.6	88640.7	103508	72514.3	241241	101824	94332	68891.9
M_1236	5,8-Dimethoxy-6-[4-diethylamino-1-methylbutylamino]quinazoline	C19 H30 N4 O2	346.235	8.257	58428.5	33251.4	42716.8	21998	17465.2	26664.3	37180.5	37515.5	49258.4	24186.3	29583.3	41430.5	16199.6	241125	61120.3	175839	100592
M_1237	dihydroxyphenylalanine	C9 H11 N O4	197.069	6.694	240917	154235	156067	176131	6159.73	10091.3	3124.86	22791.2	20687	9801.49	21998.9	9602.85	10345.6	5737.29	4911.2	5208.71	5220.1
M_1238	6-(1-Piperidinyl)[1,2,5]oxadiazolo[3,4-b]pyrazin-5-amine	C9 H12 N6 O	220.108	8.241	240250	197862	62064	36208.8	2747.28	48505.7	21489.3	28624.3	42911.6	34833	57914.7	37829.1	33930	35909	8452.01	30056.8	2326.39
M_1239	MFCD00055819	C5 H9 N3 O4	175.059	1.562	61474.2	79706.4	143055	91536.5	174628	240186	91137.2	105666	87746.5	110119	58455.7	79843.1	131164	149836	160601	141260	112056
M_1240	6-Methylnicotinamide	C7 H8 N2 O	136.061	1.017	54677.6	89009.8	77482.5	35854.5	39927.6	57004.9	49757.5	30885.9	38618.8	26236.5	39496.5	63596.7	40727.9	239895	83329.9	141821	93598.1
M_1241	2207	C9 H16 O3	172.11	7.764	28723.7	60796.3	41165.7	82568.9	168586	38538.8	60077.7	144651	239874	86125.8	70001.9	52425.9	53211.4	21881	9080.95	6547.24	5829.71
M_1242	Diethyl (2-(2,2,3-trimethylcyclopentyl)ethyl)malonate	C17 H30 O4	298.214	8.227	6742.02	9035.17	6533.78	5986.82	11588.7	10555	5878.08	4995.2	3867.73	4916.58	6044.86	4053.29	9214.93	5961.52	3797.7	3718.13	4504
M_1243	5-[Fluoro(dimethyl)silyl]-1,3-cyclohexanedione	C8 H13 F O2 Si	188.067	3.344	1082.3	700.093	103722	67524.7	231.978	70986.1	68851.8	151.561	127092	88975.5	451.556	646.559	112883	1180.57	36835.5	174.373	87532.9
M_1244	2-(2-(4-Nonylphenoxy)ethoxy)ethanol	C19 H32 O3	308.234	9.438	15810.1	10296.7	9339.04	238600	7111.96	5577.92	6210.25	6192.84	10399.6	8554.34	11552.6	5936.46	6970.07	4346.42	8297.61	6298.24	6622.84
M_1245	4-[(6-Hydroxyhexyl)oxy]benzoic acid	C13 H18 O4	238.12	7.808	3272.81	6207.53	4410.24	3192.62	202057	222362	31900.1	30221.7	104835	6498.69	215229	88689.9	16256.2	3657.49	7984.88	4981.32	36400.5
M_1246	1-{[4-Hydroxy-6-(methoxymethyl)pyrimidin-2-yl]thio}-3,3-dimethylbutan-2-one	C12 H18 N2 O3 S	238.082	7.073	4208.06	16814.8	12431.9	23309.9	17730.4	11922.1	18868.3	9034.54	12348.8	14996.5	20689.6	10633	13808.4	17681.1	11611	238283	146237
M_1247	Ethyl L-methioninate	C7 H15 N O2 S	177.082	3.157	173894	94122.8	135677	68991.1	19820.5	58294.5	26496.1	32613.8	38299.1	50117.7	32818.8	58724	62458.5	238077	183113	56629.4	135423
M_1248	1-[7-(1-Hydroxyethyl)-1-benzofuran-2-yl]-2-[(2-methyl-2-propanyl)amino]ethanol	C16 H23 N O3	277.168	7.84	21714.6	2778.5	17007.7	237992	2288.06	3099.9	3342.77	2977.22	3954.42	3662.21	2961.25	3313.27	1903.85	2149.08	1844.16	1976.37	2090.34
M_1249	N-hydroxyhexahomomethionine	C11 H23 N O3 S	249.14	7.47	5105.76	4876.94	5038.63	4920.36	10552.8	10554.1	6890.62	11880.8	4811.4	5106.14	4966.53	8856.31	3496.13	237972	52389.3	74707.2	45258
M_1250	N-Methylmorpholine	C5 H11 N O	101.084	1.073	44485.2	76131	40483.6	78332.3	18566	14476	25754.2	35982.9	69196.9	39821.5	237954	31655.2	22488.2	29433.5	59444.9	8251.49	12487.3
M_1251	L-Threonyl-L-seryl-L-lysine	C13 H26 N4 O6	334.185	0.799	237755	4547.57	5060.26	70986.2	2408.9	3666.84	2542.75	2109.88	1668.12	2269.11	2317.29	2614.12	2069.01	5384.7	3415.52	2879.45	4599.28
M_1252	4,4'-Methylenebis[2-tert-butyl-6-(.alpha.-methylbenzyl)phenol]	C37 H44 O2	520.336	9.139	10749.5	237700	3907.43	10640.6	4541.21	3815.17	3939.58	4042.1	5930.97	8524.87	3903.53	3772.54	3329.41	5271.14	5939.71	3965.13	6291.82
M_1253	Oglufanide	C16 H19 N3 O5	333.132	5.665	126615	167326	174319	100616	75916	96468.3	107210	55537.9	64113.8	41836	86885.6	115667	81402.8	59162.5	116496	200983	236841
M_1254	CU5250000	C8 H5 N O	131.037	4.476	92861.7	1953.29	13153.1	236739	5945.84	16059.8	1880.25	3409.3	2044.41	7654.63	3790.64	2142.07	5141.96	3952.05	3704.97	11567.7	1450.99
M_1255	Trimethoprim	C14 H18 N4 O3	580.268	3.403	7989.19	73298.1	16753.5	57928.3	10709.2	11309.5	9414.95	129592	236613	9155.56	8918.5	10440.2	8571.07	8445.46	8757.72	9092.29	9931.89
M_1256	2361	C10 H18 O2	170.131	7.954	106374	166727	71792.3	235575	6351.4	7458.29	4294.81	5533.31	11479.8	92877.5	142653	7615.91	42278.2	65994.1	7057.35	10739.6	19112.1
M_1257	Paracetamol	C8 H9 N O2	151.063	6.175	10717.3	9495.54	1034.96	10087.1	2015.57	1035.59	1109.52	10316.7	9736.48	8596.6	10074.3	10895.2	7920.73	11161.2	1096.25	1047.71	10300.8
M_1258	Glycylglycylglycine	C6 H11 N3 O4	189.075	1.762	36829.6	153755	29108.5	46820.5	33517.3	44450.3	75253.7	67600.3	44012.7	44874.7	111941	54788.3	58899.9	141750	234992	1842.6	76499.2
M_1259	negamycin	C9 H20 N4 O4	248.148	1.586	31077.1	234314	75302.5	95435.7	50795	73913.4	35652.7	84254.5	16242.6	29008.8	54522.9	59912.8	32176.3	146379	16773.1	24827.1	21277.7
M_1260	2,3-Dideoxy-3-nitropentarate	C5 H5 N O7	191.007	1.071	146430	233869	152643	108182	44012.8	60785.1	55030.2	108540	55618.1	44288.9	73030.8	63859.2	59158.4	103095	35822.8	23018.5	51577.7
M_1261	3,3'-Sulfanediyldipropanehydrazide	C6 H14 N4 O2 S	206.084	1.441	2155.79	2390.46	2069.68	1874.08	1582.33	2075.77	2018.22	2273.16	1830.24	1745.57	1866.83	1762.96	1886.87	3722.11	2150.03	233865	2069.32
M_1262	1-(4,6-Diaminopyrimidin-5-yl)guanidine	C5 H9 N7	167.092	3.289	166943	233801	179940	49786.3	23367.1	10751.7	2876.48	2963.53	2693.97	3300.98	2899.82	2842.36	2869.49	3772.06	3140.65	3447.18	3249
M_1263	S-(2-{[4-(2,6-Dioxo-1-piperidinyl)butyl]amino}ethyl) hydrogen sulfurothioate	C11 H20 N2 O5 S2	324.081	4.008	1746.55	1691.72	1588	1664.52	2252.4	1628.65	2272.76	1527.05	1687.44	1718.54	1574.18	1580.5	1567.06	233308	1709.31	1572.26	1638.31
M_1264	p-Hexyloxybenzoic Acid	C13 H18 O3	222.126	7.787	4339.06	4051.11	4214.48	4018.16	117109	129751	25333.3	232561	16935.6	110034	162461	93538.7	8470.98	3650.2	2920.4	2749.34	2582.2
M_1265	1-Benzenesulfinylpiperidine	C11 H15 N O S	209.088	2.163	4494.52	15767.9	15014.9	9170.61	26405.8	18743.6	20169.4	11282	25478.6	29703.4	16516.1	12720.8	10417.3	117201	66298.8	232274	105244
M_1266	1,4-Dimethyl-N-nitro-1,4-dihydro-5H-tetrazol-5-imine	C3 H6 N6 O2	158.055	1.21	50456.5	50636.7	110586	72125.7	84256.2	99191.8	105773	81935.3	93797.7	93226.5	96110.3	123797	128598	178994	133266	129117	231732
M_1267	3,5-Diamino-N-carbamimidoyl-2-pyrazinecarboxamide	C6 H9 N7 O	195.087	6.431	26318.4	20603	55887.6	61016.6	36215	45252	31884.2	20595	13557	17639.6	15065.6	32901.6	31474.1	231133	56011.8	59121.4	87795.7
M_1268	80122	C7 H13 N O	127.1	6.747	32219.4	9270.55	60953.4	45712.4	31453.2	69451.4	60192.4	14542.1	17720.2	10722.4	19179.7	41246.9	11360.9	231125	40535.9	45365.5	64847.5
M_1269	1-(4,6-Dimethyl-2-pyrimidinyl)-3-[3-(2-oxo-1-pyrrolidinyl)propyl]guanidine	C14 H22 N6 O	290.186	8.872	219447	138210	126060	230274	110924	105586	94116.2	126226	162701	128180	116485	115317	154262	74883	92137	110977	75510
M_1270	secoverine	C22 H35 N O2	345.267	10.018	102049	229552	62558.9	41891.3	153037	94441.6	92941.3	186246	199569	177213	117222	60822.4	96717.5	182280	66152.6	44113.7	53387.9
M_1271	aldehydo-D-glucosamine 6-phosphate	C6 H14 N O8 P	259.046	1.184	228522	108153	153078	87173.5	9419.39	28079.3	18025.6	19877.1	53008.9	16237.9	52661.4	9425.26	17213.2	10401.7	41883.5	16092.7	27978.5
M_1272	8-Hydrazino-7-(2-hydroxyethyl)-1,3-dimethyl-3,7-dihydro-1H-purine-2,6-dione	C9 H14 N6 O3	254.113	7.673	18860.8	52302.4	39630.3	226653	45052.7	57595.6	25638.8	3701.49	3940.92	36693.8	21121	29436.2	31342.5	139409	23170.7	67122.5	85261.5
M_1273	Gallic acid	C7 H6 O5	170.022	2.214	13200.9	57407.4	16582.6	31715.9	16740	20920.8	42369.5	24521	9216.06	26065.5	12654.4	9235.95	10710.9	226395	199261	85351.8	177054
M_1274	1-Adamantanemethanol	C11 H18 O	166.136	8.799	46953.5	40991.8	46157.6	226183	32723.3	35752.5	40390.9	41035.8	37722.2	33431.4	37669.7	40683.7	41363	32939.7	41725.9	31808	35071.7
M_1275	aloin A	C21 H22 O9	418.127	7.704	6712.72	5342.35	7838.57	7062	5996.99	6048.8	6000.11	5486.9	5881.9	7112.02	5643.61	5702.32	3670.36	205604	212568	226015	187878
M_1276	Indane	C9 H10	118.079	8.536	187458	163809	146014	101087	85096.7	108147	100989	135810	146965	104622	129971	100317	36951.2	51170	97686.9	58628.3	60993.8
M_1277	N~2~,N~6~-Dioctanoyl-L-lysine	C22 H42 N2 O4	398.315	9.278	78531.9	224901	177213	94932.5	24206.4	222033	53104.5	37093	9350.93	7713.1	37492.9	6730.89	19682	53442	33231.1	31494.7	35415.2
M_1278	Pentahydroxyphosphorane	H5 O5 P	115.988	1.413	134830	224738	176314	188358	26287.4	91110.4	63370.5	65982.2	61715.8	47590.3	43504.9	17715.6	66430.6	136519	14057	10221.9	26873
M_1279	Testosterone	C19 H28 O2	288.209	9.022	224657	145536	98853.7	110754	94496.6	73157.8	96901.2	63047.5	175877	127848	71430.1	88624	129128	97853.4	76710.4	88603.6	91506.3
M_1280	Benzylsodium	C7 H7 Na	114.044	0.597	846.89	13988.1	8829.15	839.277	224464	22405.9	1697.5	11090.9	16901.1	6843.81	3060.58	8228.92	1755.35	4839.18	3595.98	6210.21	1739.13
M_1281	Piperonylonitrile	C8 H5 N O2	147.032	7.458	224264	101105	26562.5	32821.5	12766.8	9902.01	16520.8	9790.69	16647.9	8510.64	20699.6	19942.3	7981.86	8722.75	4834.81	9780.51	6214.14
M_1282	3-(Allylsulfanyl)[1,2,4]triazino[5,6-d][3,1]benzoxazepine	C13 H10 N4 O S	270.058	1.942	36536	7594.35	11487.8	223450	6386.67	7617.3	8307.84	7112.62	6220.04	6948.22	7578.92	7659.38	7142.8	12320.1	8485.17	7780.1	8529.53
M_1283	1957290	C14 H22 O4	254.151	8.622	16846.2	13984.5	11950.1	15084.7	14421.6	9876.38	11398.8	13715.8	10953.3	2247.66	14457.4	11742.5	12235.7	2637.08	2753.04	1758.18	9885.03
M_1284	2,2,2-Trifluoroethyl	C2 H2 F3	83.0109	1.193	50828.9	83730.5	83035.5	56146	154353	156423	129283	90637.9	84964.8	217020	96006.2	144875	207048	116898	222555	216502	166928
M_1285	Benzyl 2-acetamido-3,4,6-tri-O-benzyl-2-deoxyhexopyranoside	C36 H39 N O6	581.279	10.692	112713	172057	118648	74610.2	164476	157536	222522	147308	145086	174057	110508	120641	81059.7	11569.3	67721.1	65648.3	100490
M_1286	6-(1-Azepanyl)-N-(2,3-dimethylphenyl)[1,2,5]oxadiazolo[3,4-b]pyrazin-5-amine	C18 H22 N6 O	338.186	8.842	51474.6	39224.9	37011.9	35372.5	5184.03	7069.73	35302.3	30099.5	34720.6	38834	47221.3	31707.3	14629.1	192278	157974	160383	221211
M_1287	N-Cyclohexyl-N'-(5-methyl-1,2-oxazol-3-yl)sulfuric diamide	C10 H17 N3 O3 S	259.099	1.484	149493	142709	220942	4389.03	61326.2	82826.1	71106.8	147241	28766	45085.2	45477.1	35686.2	74478.7	9864.7	26398.3	6078.1	5597.25
M_1288	gamma-Aminobutyric acid	C4 H9 N O2	103.064	1.195	53549.2	36163.7	55951.5	30884.7	48487.7	50596.9	44567.7	43463	36049.9	38994.5	62170.9	47059.8	29712.7	220629	90408.2	84075.5	216811
M_1289	g-Butyrobetaine	C7 H15 N O2	145.11	2.005	24373.8	20330.8	14167.9	23613.3	176282	8712.11	209415	45754	94969.9	96913.1	76175.4	181844	56701.5	27759.6	20296.9	18761.5	25778.4
M_1290	2,5-TBHQ	C14 H22 O2	222.162	8.809	36292.8	43553	32344.1	11343.2	27517.6	30921.6	28527.9	30378.1	33120.7	29452.3	34283.8	29920	17279.1	220461	2326.78	28203	34285.1
M_1291	Methyl N-acetyl-S-(2-hydroxycyclohexyl)-L-cysteinate	C12 H21 N O4 S	275.119	4.542	27644.1	47227.2	15392	66552.5	38582.3	15472.3	30652.6	23410.6	33408.6	47035.5	63026.7	19569.2	57826.2	220444	12120.9	4633.52	28363.3
M_1292	4-(2H-Tetrazol-5-yl)-1,2,5-oxadiazol-3-amine	C3 H3 N7 O	153.04	1.102	112519	131224	115363	108764	90811.2	130758	136331	112320	110591	81964.8	120062	98625.1	93342.7	102738	70190.9	219436	83728.6
M_1293	g-Butyrobetaine	C7 H15 N O2	145.11	3.264	34737.7	219394	68055.9	51332.5	165851	44287.1	35504.9	26220.6	22838.7	25008.1	19498.3	43107.9	7139.89	12598.7	8288.28	55423.8	16675.9
M_1294	Gly-Lys	C8 H17 N3 O3	203.127	1.446	1688.56	1686.43	1525.94	1414.99	14439.7	4294.37	15245.7	3886.34	4021.3	9673.94	4677.9	7469.21	8620.81	219208	14785.5	44932.3	23443.8
M_1295	N-methylethanolamine phosphate	C3 H10 N O4 P	155.035	1.6	219138	62537.2	155018	114486	47414.6	72828.4	41390.1	53071.7	64383.8	28516.6	6277.98	91187.3	34644.1	13287.7	8235.11	29413.3	48299.6
M_1296	Butyl O-phosphonoserinate	C7 H16 N O6 P	241.071	1.242	218826	189675	75444.1	60389.5	127747	120914	101161	59941.2	55552.3	90605.7	108269	50062	178701	20944.2	94578.9	21383.9	100608
M_1297	2,3-Dihydroxypropyl nonanoate	C12 H24 O4	232.168	8.083	90684	164013	130359	120477	87205.1	213066	104862	141390	139029	148284	95949.8	90257.5	51651.5	116169	24833.9	91661.6	80341.6
M_1298	Ethyl 4-acetamido-5-amino-3-(3-pentanyloxy)-1-cyclohexene-1-carboxylate	C16 H28 N2 O4	312.206	9.142	91668.8	50479.7	44190.7	26996.5	18604.7	13390.4	19554.3	6735.08	48557.4	217739	15076.3	1154.7	18524.4	32819.6	18739.1	14032.8	17422.3
M_1299	Homocitrulline	C7 H15 N3 O3	189.111	1.119	19134.3	38677	21178.2	24312.9	36312.4	31905.8	29858	22756.3	22007.7	36036	121022	59318.8	157704	216819	87728.4	42673.6	108976
M_1300	2,2'-Thenil	C10 H6 O2 S2	221.981	1.077	215561	77507.2	88426.2	39880.8	6806.48	8665.07	10379.1	22943	23888.8	14983	20997.6	20000.2	15600.7	19903.7	14937.1	3423.86	18843.6
M_1301	4-[(6-Hydroxyhexyl)oxy]benzoic acid	C13 H18 O4	238.12	7.709	1481.82	1535.88	1534.46	1513.4	28716.5	20996.9	60270.6	58968.5	63466.8	54077.2	215229	63085.3	7806.16	1219.09	13697.2	24666.2	989.373
M_1302	Propylparaben	C10 H12 O3	180.079	7.827	5374.14	23912.7	5390.04	5421.8	147775	156429	90892.9	4237.42	21924.1	17921.9	211785	214548	72104.7	3633.03	3443.99	15286.1	5064.18
M_1303	BOC-L-PHENYLALANINOL	C14 H21 N O3	251.152	8.518	12376	12126.2	12754.8	34111.7	10944.1	11205.5	12611.6	11221.7	10944.2	11737.8	12083.8	12008.5	10001.2	214289	64509.8	40615.5	186137
M_1304	LysoPC(18:3(9Z,12Z,15Z))	C26 H48 N O7 P	517.315	9.699	3442.71	5302.9	3142	3607.33	3399.2	3278.3	2923.54	3473.98	4266.83	3624.51	4683.55	2890.92	2643.99	72114.1	2715.29	2722.01	2998.72
M_1305	VS1150000	C18 H34 O4	314.246	8.992	16656.5	15809.6	2559.73	14938.5	13310.3	13565.2	17808.9	14334.8	20121.1	27061.6	31731.3	14389.2	21216.5	213794	26473	23580.9	28714.8
M_1306	L-Glutamic acid 5-benzyl ester	C12 H15 N O4	237.1	7.495	105533	48766.8	213503	200225	62873.3	141193	103660	49341.9	19297.8	35906.3	25452.7	61192.4	18415.9	28500.6	20361.3	97906.1	25527.6
M_1307	N-Hydroxyphthalimide	C8 H5 N O3	163.027	2.743	17473.9	16455.8	22108.8	16571.3	36009.2	30570.8	56781.1	41682.4	17397.9	80453	13914.4	80894.6	23723.6	31049.4	101802	66444.5	213315
M_1308	2-Hydroxy-3-(palmitoyloxy)propyl 2-(trimethylammonio)ethyl phosphate	C24 H50 N O7 P	495.333	10.787	133820	136617	175277	130405	192612	172631	175304	89958.8	140596	211667	144920	195507	188561	56858.8	79307.5	119766	129316
M_1309	2-O-(Methylsulfonyl)pentose	C6 H12 O7 S	228.03	1.237	211645	121749	128708	17964.5	187700	107483	70335.1	23419.1	4188.89	20489	34839.2	28853.6	27285.4	11686.5	79491.3	5917.54	112752
M_1310	(4S)-4-Cyclohexyl-L-proline	C11 H19 N O2	197.142	7.889	39543.3	46966.5	40784.7	54145.8	167126	210860	168151	66685.1	62680.7	115034	84304.3	67709.4	60576.4	30689.8	23400	25390.3	26535.1
M_1311	L-Proline	C5 H9 N O2	115.064	0.757	13194.2	2405.84	28537.5	11702.9	10494.1	24521.2	13000	131965	40504.4	10796	2601.6	2911.94	10543.5	3917.67	21336.8	66734.6	210657
M_1312	Falecalcitriol	C27 H38 F6 O3	524.271	9.285	67748	86976.1	40382.2	5138.82	80433.3	162315	157172	210237	207640	209936	125286	141623	86700.7	23428.2	109376	64892.3	148175
M_1313	OB4520000	C10 H9 N O	159.068	7.263	15439.4	18232.1	14390.6	18276.1	10360.1	8163.16	13624.6	6887.29	8812.69	15342.8	2865.03	6223.87	11303.5	82028.7	23691.6	44462	36491.9
M_1314	L-(+)-Leucine	C6 H13 N O2	131.095	1.095	108151	55073.5	127780	69532.1	155527	199952	210055	78900.4	11337	42798.1	28588.9	165107	74879.7	5383.82	6030.24	5958.66	6015.89
M_1315	Phenolate	C6 H5 O	93.0346	5.332	56011.4	59990.9	70807.4	38205	66652.1	72387.1	50543.2	8393.95	23867.7	44271.5	47912.6	63456.8	65329.5	49606.9	98983.8	209280	70651.1
M_1316	protocatechuic acid	C7 H6 O4	154.027	4.852	3359.64	3906.97	3240.68	3558.18	3813.4	3510.42	3242.53	4834.39	3208.26	3210.68	3542.45	3109.87	3268.71	3459.8	3241.29	3420.14	3431.05
M_1317	2,5-TBHQ	C14 H22 O2	222.162	9.634	37398.4	40839.5	30169.1	3879.6	8418.06	32478.6	23822	28281.3	30232.5	27757.4	35174	33506.7	23668.7	33036.8	28600.1	31485.2	35149.9
M_1318	Muscimol	C4 H6 N2 O2	114.043	1.36	66610.7	4436.02	5201.8	15460.7	13104.1	23672.3	207041	12567.2	45190.4	41481.8	22413.1	13700.1	35408.6	34744.6	107368	34462	182239
M_1319	Loratadine impurity H	C8 H13 N O3	171.09	3.644	206929	67659	156677	138889	41216.8	80633.8	69092.5	72930.5	87734.5	114477	114462	91955.9	104069	9953.24	15513.2	16664.9	21943.7
M_1320	[(Dicyclohexylamino)sulfanyl](dimethylamino)methanethione	C15 H28 N2 S2	300.17	8.783	69040.8	43817.3	44993.6	35400.9	127060	144701	111290	185311	116776	126914	114884	163699	107322	33856.9	156196	44922.2	100770
M_1321	(2E)-2-[(1E)-1-{[(Z)-Amino(hydrazono)methyl]hydrazono}-2-propanylidene]hydrazinecarbohydrazonamide	C5 H14 N10	214.141	10.475	116762	107415	205374	96070.9	95380.7	70833.4	86481.5	94657.1	117280	58775.3	99177.7	88436.1	46877	60007.7	69291.7	158631	64576
M_1322	Linoleamide	C18 H33 N O	279.256	9.15	27165.5	13445.8	13262.3	5437.96	205194	145396	88078.8	32705.9	14984.5	48303.2	48647.4	4448.93	14235.9	13723.7	9405.65	33452.5	6453.73
M_1323	4-ethyl-2,3-dioxopiperazin-1-carbonylchlorid	C7 H9 Cl N2 O3	204.03	0.784	109736	173057	168881	135277	88584.9	136932	106930	89190	32630.2	93179.4	92297	79079.1	84716.5	205109	116722	106910	161971
M_1324	[4-(Phenylsulfanyl)phenyl]methanol	C13 H12 O S	216.061	1.127	9856.58	9198.18	11152.6	11645.2	10463.7	12622.7	12103.2	12820.1	9722.11	9258.99	10885	10459.1	11280.1	205088	66172.3	20680.6	61408.4
M_1325	5-Hydroxyindole-3-acetic acid	C10 H9 N O3	191.058	6.08	204232	141614	127914	64595.1	31322.1	113981	22895	9646.29	23327.2	84525.5	5658.35	16521.9	152967	65021.8	62125	179337	16755.6
M_1326	carisoprodol	C12 H24 N2 O4	260.173	8.655	66109.8	104373	184849	104865	72091.8	204158	70691.3	73207.2	49934.3	45465.5	114147	72320.5	71840.3	75179.9	150642	83023.5	77676.3
M_1327	4-Fluorobenzaldehyde	C7 H5 F O	124.032	0.596	177298	166335	1472.38	4914.06	4980.49	557.364	4713.64	189542	3275.13	10862.2	186281	12249.6	4226.96	9958.27	7622.34	12896.6	11203.5
M_1328	(1-Oxido-2,6,7-trioxa-1-phosphabicyclo[2.2.2]oct-4-yl)methanol	C5 H9 O5 P	180.019	1.845	203519	163540	133405	144734	64921.2	43938.6	62810.3	66080.7	67099.5	84357.6	65683.8	84275	97549.1	24380	50156.2	53887.4	43886.9
M_1329	tioxolone	C7 H4 O3 S	167.988	0.837	203447	130908	143427	198868	65956.4	109437	63130.8	52509.3	23376.4	54250.9	52745.6	57727.5	31404.6	191379	68697.3	95127.5	175023
M_1330	Docosahexaenoic acid	C22 H32 O2	328.24	9.955	69295.9	203438	3411.72	1626.86	6747.64	1372.37	3541.63	27200	12364.1	46909.8	14737.6	27045.3	6006.53	110036	64502.2	8291.5	2695.92
M_1331	Asarone	C12 H16 O3	208.11	7.737	24958.3	6050.77	21005.8	29755.3	143081	71304.9	66334.2	76684.6	35977.6	54764.5	203111	81689.2	46334.5	20125.3	3279.56	5074.58	15807.1
M_1332	N-Acetylphenylalanylleucyl-N-[(3E)-3-ethylidene-9-isopropyl-6,13-dimethyl-2,5,8,11-tetraoxo-1-oxa-4,7,10-triazacyclotridecan-12-yl]phenylalaninamide	C42 H57 N7 O9	803.425	8.426	189451	168926	158998	203003	123557	176942	3515.28	59715.6	17331.9	8883.16	168492	38223.8	14271.9	82176.2	20879.8	24366.4	74691.9
M_1333	octylphenol	C14 H22 O	206.167	8.954	85968.8	195547	110859	163983	129782	202628	93518.3	132948	186013	143292	107192	143843	106978	150058	95577.3	200774	178103
M_1334	fMet	C6 H11 N O3 S	177.046	3.285	46247.3	50694.5	105757	69172.9	100250	96833.1	75016.9	88763.8	5708.89	120030	202606	106253	113426	7460.69	28739.7	37013.7	191371
M_1335	methylthiomethyllithium	C2 H5 Li S	68.0269	0.597	6453.72	201883	3229.92	8501.64	7042.23	1573.23	8995.53	3063.79	151917	15246.6	13824.1	13557.2	7587.35	12575.3	9455.25	7876.6	13964.4
M_1336	2,5-Furandicarboxylic acid	C6 H4 O5	156.006	2.85	14509.6	25553.9	15373.6	17333.7	48077.9	29317.1	24673.9	17818.2	11934.7	49319.5	29116.7	171471	201641	37210.4	20271	108329	52389.1
M_1337	b,e-Carotene-3,3'-diol	C40 H56 O2	568.427	9.192	29818.7	201068	27311	28528.9	24855.8	24576.3	26976.9	26328.5	25745.8	26021.2	24090.4	26348.6	22289.5	35924.9	36767.6	28685.4	40228.8
M_1338	(2-Amino-3-hydroxybutanoyl)oxonium	C4 H10 N O3	120.065	2.234	59007.3	50675.4	56890.9	58531.9	62542.1	75909.1	13554.9	2265.06	6761.14	2686.47	70699.7	68403.6	10686.9	200983	3454.04	21609.8	109794
M_1339	metharbital	C9 H14 N2 O3	198.1	2.898	44086.6	64245.7	64502.8	45733.6	45998.3	47433.8	29831.1	13820.3	5346.98	60275	47144.7	116400	96385.6	200625	34022.3	6349.14	51479.9
M_1340	N~2~,N~2~,N~4~,N~4~,N~6~-Pentaethyl-1,3,5-triazine-2,4,6-triamine	C13 H26 N6	266.222	9.517	148280	162827	104063	97324.8	115208	200402	92447.9	191610	15856.4	132338	106126	174541	72234.8	147888	82564.9	155561	132843
M_1341	MFCD00037048	C17 H33 N O	267.256	9.669	9421.75	9850.95	8086.56	8384.24	200388	6334.13	139580	7286.7	7610.93	7613.35	7180.09	7274.48	6611	6435.06	6924.26	7119.1	7940.18
M_1342	Elaidolinolenic acid	C18 H30 O2	278.224	9.792	94125.6	153948	56300.4	61929.8	94943.9	74247	113323	170441	115696	200275	94588.5	65100.3	115360	63201.7	149522	44929.6	133478
M_1343	1-Naphthylisocyanate	C11 H7 N O	169.053	3.497	61889.8	134833	109096	79901.2	164277	174605	114595	66739.5	109499	126281	101123	199961	124856	84032.8	74253	112444	152934
M_1344	Diethyl (benzyloxy)(methyl)malonate	C15 H20 O5	280.13	8.543	143458	116749	199544	68605.3	97994.3	48832.4	42814	125564	147224	94061.7	89202.8	71838.7	24565.5	5298.61	73935.6	52653.7	54098.8
M_1345	Temozolomide	C6 H6 N6 O2	194.056	6.866	21387.5	25855.9	18428.6	19069.5	38127.4	22786.9	1732.12	18883.9	36141.8	25214.7	33959.9	11064	24900.3	199225	39035.1	51433.7	27136.8
M_1346	1-Butyl-4-isothiocyanatobenzene	C11 H13 N S	191.077	2.42	45448.6	198652	69138.6	56387.6	28924.4	12173	27171.3	155949	126617	75601.9	63097	78432.8	93723	16879.7	10214.2	15876.3	11038.5
M_1347	Demethylphosphinothricin	C4 H10 N O4 P	167.035	7.392	14286.8	24776.5	23072.1	23244	12982.3	24638.8	19979.6	7223.74	10534.9	5849.39	4177.79	13429.5	1880.63	1105.77	1093.69	1445.97	1279.69
M_1348	Bufadienolide	C24 H34 O2	354.257	8.755	12735.7	3797.91	57248.4	2285.47	5084.22	25611.6	370.364	385.851	23711.6	7117.6	17263.8	2952.91	323.254	9039.53	5140.47	52953.3	197939
M_1349	C8-HSL	C12 H21 N O3	227.152	8.507	17377.3	30435.2	28024.9	14144.9	44331.9	18736	58623.8	25883.1	19707.5	27600.4	17108.9	21298.3	13424.2	71269	82780.8	58894.5	197893
M_1350	C7-HSL	C11 H19 N O3	213.137	7.931	60299	42937	67129.3	34472.7	106987	189847	197696	46299.7	18000.4	25207	9974.48	64219.2	49792.1	4637.87	4896.09	3899.61	4560.02
M_1351	8-Azaguanine	C4 H4 N6 O	152.045	5.067	9327.67	63215.1	44600.3	55045.6	24196.8	7816.88	32024.6	32292.2	94271.7	64347.8	114435	49824	76896.5	196534	62794.3	45625.5	59288
M_1352	1-BOC-Piperazine	C9 H18 N2 O2	186.137	4.767	28147.7	33913.6	17320.7	25711.7	32775.5	196457	16313.9	39346	28538.7	91826.9	84113.5	26980.3	32080.6	41748.4	51211.1	40365.5	49065.8
M_1353	Methohexital	C14 H18 N2 O3	262.132	5.21	65903.6	196214	130424	74054.6	21944.2	32854	66904.6	22171.4	12735.9	25449.3	27200.7	26126.9	32308.8	21115.1	39085	55823.2	73329
M_1354	8-Hydroxyquinoline	C9 H7 N O	145.053	5.014	23506.4	17289.2	20799.2	3419.63	19915.9	21555.6	11625.1	6069.49	18343.7	18567	7851.23	25630.9	17816.3	62324.8	12799	13888.1	22671.1
M_1355	2′-Hydroxy-4,4′,6′-trimethoxychalcone	C18 H18 O5	314.115	8.605	104091	63832.1	53553.7	74701.4	187670	88734.5	66235.6	75970	89743.9	54227	63399.1	64561.5	80243.6	56677.4	37580.8	195681	47033.5
M_1356	3796	C12 H18 O3	210.125	8.132	20936.6	3170.55	11018.8	20032.9	15477.3	19106.8	23583.1	17708.3	19331.8	3980.73	19645.5	5845.85	3009.06	195149	929.115	13040	12212.7
M_1357	2,4-Bis(dimethylamino)-6-nitro-1,3,5-triazine	C7 H12 N6 O2	212.103	7.37	9792.29	10209.8	5318.06	10033.1	5315.67	27534.5	16504.3	195030	10328.3	5238.87	4533.75	6246.67	4618.4	7250.85	10825.8	1936.54	16542.2
M_1358	o-Toluidine	C7 H9 N	107.074	1.518	2678.65	2653.44	3597.52	3079.89	6506.15	6978.74	1988.5	4099.31	3010.46	4134	5161.53	10922	2784.37	1908.93	9043.2	3754.88	10281.8
M_1359	Dimethyl(2-methyl-2-propanyl)silyl N,1-bis[dimethyl(2-methyl-2-propanyl)silyl]tryptophanate	C29 H54 N2 O2 Si3	546.351	9.934	56555.2	6193.4	5945.21	194391	17931.5	6375.09	6411.98	5647.33	6095.12	2286.94	9440.51	4971.95	4359.52	1101.3	6089.88	1563.28	10168.9
M_1360	(6Z)-5-Methyl-6-[(2E)-(5-methyl-1,3-diazatricyclo[3.3.1.1~3,7~]dec-6-ylidene)hydrazono]-1,3-diazatricyclo[3.3.1.1~3,7~]decane	C18 H28 N6	328.237	9.547	833.882	383.329	5440.36	1073.84	836.813	6422.64	214.626	300.27	254.787	10681.7	1808.71	222.759	203.889	740.175	748.193	1878.24	194356
M_1361	Acetanilide	C8 H9 N O	135.069	1.392	11010.6	58267.7	38226.2	63786.8	89852.4	194167	43367.3	18183.7	20193.5	29130.7	23249.5	95145.6	10268.2	120769	47024.7	17650.1	37269.3
M_1362	Acetanilide	C8 H9 N O	135.069	1.326	56725.3	191308	38226.2	63786.8	89852.4	194167	49959.1	140859	16927.2	42457.4	101745	95145.6	134053	120769	106110	43629.2	145013
M_1363	D-Erythritol 4-phosphate	C4 H11 O7 P	202.024	1.196	194017	105189	98550.7	7365.73	6826.46	7452.87	7712.25	6511.7	6716.54	6352.31	6777.23	7348.68	6616.5	12398.8	36230.9	7905.73	28885.5
M_1364	Trimethylphosphoranylidenecyanamide	C4 H9 N2 P	116.05	3.496	63506.4	118198	105259	76377.6	139168	147255	109995	95069.3	92324.6	84508.2	102055	78554.8	60721.7	74784.8	100312	137613	130007
M_1365	1-Boc-3-pyrrolidinol	C9 H17 N O3	187.121	7.797	100145	193132	114443	163865	18186.1	43457.4	42856.8	52469.8	42944.3	96716.4	107749	26398.8	41903.3	174275	23588.2	16541.7	63989.2
M_1366	2475675	C23 H34 O2	342.256	8.97	24745.9	28521.3	30058.8	17514.9	6406.27	18779.4	193071	6961.54	7210.97	19745.7	10947.9	44917.3	12094.9	153974	28101.7	27350.4	9688.53
M_1367	AS8925000	C11 H16 O4	212.105	7.497	5568.79	6964.13	19132.4	14637	2986.29	17458.2	193008	18934.6	18827.6	18557.8	3351.48	17044.8	13413.9	24442.6	8379.56	9511.99	10414.2
M_1368	2-Amino-6-propoxybenzothiazole	C10 H12 N2 O S	208.067	4.024	3694.46	3646.95	7913.86	4591.98	32777.4	21552.6	58922.3	37639.6	59091.6	84011.7	192647	118811	45888.5	3639.54	8213.34	3397.15	12651.4
M_1369	Glufosinate	C5 H12 N O4 P	181.051	7.887	7540.03	6989.08	7582.42	7627.1	6130.75	6780.09	6325.4	5960.97	6157.49	6793.02	6213.39	6504.1	4867.37	5563.81	5119.07	4755	5344.15
M_1370	6132055	C19 H36 O3	312.266	9.736	55567.4	105335	96016.5	34717.2	96141.2	96646.1	101899	108920	146053	86573.3	99621.3	134176	57733.5	59284	138470	61295.5	81389.7
M_1371	(2-Heptadecyl-4-methyl-4,5-dihydro-1,3-oxazol-4-yl)methanol	C22 H43 N O2	353.329	9.923	101394	113512	140112	108192	29821.9	190294	19653.5	50045.5	18136.7	13780.6	94539.1	17771.9	81498.7	113379	181451	85726.2	56447.5
M_1372	907502	C12 H25 N O2	215.189	8.166	91385.3	73609.5	136546	82461.5	76860.9	125453	128163	78817.9	109482	54694.7	121124	83461.1	71566.8	48049.9	66529.7	78052.4	47125
M_1373	6-(1-Azepanyl)-N-(2,3-dimethylphenyl)[1,2,5]oxadiazolo[3,4-b]pyrazin-5-amine	C18 H22 N6 O	338.186	8.933	2632.85	8769.52	5187.18	8421.54	5184.03	7069.73	1639.43	30099.5	4674.03	2296.69	4886.72	6214.31	1320.44	189894	41325.2	61899.7	61321.6
M_1374	MFCD01667459	C12 H17 N O5	255.11	1.585	19798.9	46771.7	20756.4	16166	20656.7	36391.2	44116.5	10690.3	3514.46	17939.4	4608.01	31705.2	4752.36	189362	23945.8	25665.6	44332.5
M_1375	abacavir 5'-carboxylate	C14 H16 N6 O2	300.134	8.527	42000.7	34817.6	33148.8	41989.3	35554.9	43522.5	92081.9	33119.8	120577	43924.6	37026.6	96427.5	24270.3	189098	27408.8	31107.5	28389
M_1376	Phenoxathiin	C12 H8 O S	200.03	1.141	142192	167710	148112	172206	106107	101482	148179	143439	145413	135166	188955	102744	94828.9	119024	119123	185148	117152
M_1377	N-Dodecanoyl-L-serine	C15 H29 N O4	287.21	7.123	117054	188600	129318	112328	53045.1	58838.2	134665	54738.7	98262.9	150430	178725	101327	76330.2	13462	31566.1	27261.8	109411
M_1378	Octahydro-1,6,7,8-indolizinetetrol	C8 H15 N O4	189.1	1.456	1685.71	4592.54	3516.73	3983.29	2654.96	4044.98	3139.45	4875.61	2859.33	2904.65	4896.36	2906.65	2930.96	6245.23	3424.85	3149.4	3270.41
M_1379	3,6-Difluoro-2-methoxyphenol	C7 H6 F2 O2	160.033	1.175	22806.5	3764.94	28845.8	14346.2	18127.4	26043.8	70004.1	14294.9	7684.3	26360	8163.86	8308.08	21076.3	185211	187870	160205	78638.6
M_1380	1792084	C15 H29 N O3	271.215	8.593	64806.4	60800.1	53777.2	55779.7	115416	187855	58234.7	79501.2	25810.8	80805.5	46663.8	94639.1	83120.8	56061.9	63271	75430.2	49643.5
M_1381	Benzyl phenyl sulfide	C13 H12 S	200.066	2.511	27701	24790.7	7488.8	17098.5	17153.4	41595.3	35428.4	11221.7	23154.3	24788.4	18990.6	5072.4	7486.92	16528	187601	36797.1	10719.3
M_1382	Arachidonic acid	C20 H32 O2	304.24	10.006	5610.62	11112.4	117533	7624.01	55547.3	11837.8	29287	59215	8019.43	2660.42	27429.1	149747	12289.8	166352	98368.9	67926.7	88821.3
M_1383	Phenyl N,N'-dibutyl-N,N'-dimethylphosphorodiamidate	C16 H29 N2 O2 P	312.198	10.385	76028.1	101409	41756.1	49505.7	85659.1	74963.3	65976.5	93286.6	106736	186477	124261	63973.8	87325.4	72975.2	87455.6	39275.7	87661.6
M_1384	3,5-Diamino-N-carbamimidoyl-2-pyrazinecarboxamide	C6 H9 N7 O	195.087	5.272	16329.3	14690.5	19347.8	26264.4	186420	64668.8	175019	22563.9	34723.4	63702	44099.5	35786.8	37988.8	41104.9	41846.3	60680.4	53292.9
M_1385	1-(4,6-Diaminopyrimidin-5-yl)guanidine	C5 H9 N7	167.093	0.798	186280	2478.44	4665.29	59642.7	1312.86	1998.44	1385.81	1149.89	909.13	1236.67	1262.93	1424.7	1127.62	2934.68	1861.47	1569.31	2506.62
M_1386	2-Hydroxyquinoline	C9 H7 N O	145.053	7.132	72261.9	73145.2	158322	85311.6	71044.4	113347	40739.9	51062.6	24577.9	84189.7	14439.1	21974	89549.2	22982.4	21730.5	185882	23356.8
M_1387	Eicosapentaenoic acid methyl ester	C21 H32 O2	316.24	9.344	34235	157242	13051.8	1777.68	38413.2	1766.91	41883.1	8790.47	8605.1	7381.8	26722.9	930.374	878.444	13560.6	2509.38	58430.6	1847.22
M_1388	3-Nitro-1H-1,2,4-triazole-1,5-diamine	C2 H4 N6 O2	144.04	1.142	47503.8	21374.2	27027.4	36871.6	41134.4	51429.7	42051.2	16078.2	35800	60897.9	58013.7	43154	68909.6	170666	102558	167632	184821
M_1389	Dimethyl(pentafluorophenyl)silyl nonadecanoate	C27 H43 F5 O2 Si	522.295	10.212	171043	129174	92368.4	54584.3	119982	99978.1	94462	96625.4	8607.28	130880	89385.8	10652.3	126490	9665.08	93934.9	84495.6	146357
M_1390	Nonylthiol	C9 H20 S	160.129	1.415	120489	65258.9	46912.4	108942	29716.6	147930	48277.2	59641.5	18980.6	123887	134296	65044.8	32802.4	184580	96661.4	127871	96618.1
M_1391	2,2'-Bipyridine	C10 H8 N2	156.069	3.518	13100.8	2036.78	52774.6	36146.6	104519	71855.1	59700	69838.2	68521.4	46832.9	115049	91639.7	62889.5	150401	137405	184310	105179
M_1392	11-Deoxy prostaglandin F1α	C20 H36 O4	362.245	10.118	26437.3	184302	70854.3	8844.78	45402.4	6178.62	6895.31	102434	15091.8	18230.5	8623.23	60352.6	48802.6	19786.5	10757.8	93961.9	9105.83
M_1393	Uracil	C4 H4 N2 O2	112.028	0.728	72309.6	109395	153198	107384	147191	121101	127238	150732	131499	118485	74391.2	132877	119943	113254	132787	129193	106188
M_1394	Leu-Leu	C12 H24 N2 O3	244.179	3.574	183692	45093.4	43330.6	94002.8	5056.88	5161.57	4342.75	4033.35	4625.68	4539.23	4258.49	4943.78	4163.76	3525.68	3888.25	4406.83	6584.27
M_1395	2512	C14 H24 O2	224.177	8.743	4077.7	3757.79	5191.14	4454.5	3901.55	4650.25	14203.1	4563.12	3834.53	3858.62	3609.28	4820.52	2635.23	183401	5219.42	3532.28	2706.43
M_1396	Isopentyl cinnamate	C14 H18 O2	218.131	9.096	52576.4	103649	26615.2	33387.7	79174.3	65585.9	121474	139228	120483	90383.8	74748.9	64370.8	51386.7	109700	165520	69530.6	152548
M_1397	Isothiazole-4-carbonitrile, 5-ethylsulfanyl-3-methoxy-	C7 H8 N2 O S2	200.009	1.148	183314	92367.4	80361.1	110020	13627.1	15072.5	13573.2	21713.7	12661.2	12058.1	18943.8	13587.9	13637.6	10628.1	11151.9	42125.5	13405.2
M_1398	Safingol	C18 H39 N O2	301.298	8.046	100332	183255	113872	96723.2	29071.8	18336.9	58933.9	29522	11224.4	25247.3	58453.8	42849.4	16287.7	10822.1	30561.4	9477.98	9583.39
M_1399	2-Butoxy-5-(2,4,4-trimethyl-2-pentanyl)benzenesulfonic acid	C18 H30 O4 S	342.187	10.045	84973.4	183224	76409.7	31448.7	93850.8	98783.6	101814	136552	133247	130283	88854.4	81425.4	95420.6	59873.3	71236.7	93970.9	51639.7
M_1400	2,1,3-Benzoxadiazole-5-carbonitrile 3-oxide	C7 H3 N3 O2	161.023	0.789	183054	125692	127161	120616	39613.6	48089.7	42669.5	27718.2	11134.4	20421.6	27501.9	16198.3	22089.9	69817.1	52458.4	41013.4	63850.1
M_1401	O-suberoylcarnitine	C15 H27 N O6	317.184	3.735	25235.3	84785.7	22608.7	36720.3	20493.1	31903.6	25317	37917.3	46126.4	44939.6	50445.1	22420.3	36355.4	182508	55068.2	37428.4	73598.1
M_1402	2,2'-Thiobis(3,6-dicyclopentyl-p-cresol)	C34 H46 O2 S	518.321	9.877	2207.87	18289.1	77062	15901.2	63448.5	42664.2	141545	34154.7	182286	53822.5	73611.8	9166.72	55001.1	21504.8	133237	54403.8	21104.6
M_1403	Clofilium	C21 H36 Cl N	337.259	8.621	9302.15	2724.58	7816.95	2408.26	182152	14916.6	164532	6453.81	3292.31	8672.77	11797	2343.19	2612.8	7654.99	2337.7	6322.76	3845.99
M_1404	2-Nitro-1,3-propanediyl bis(2,2-dimethylpropanoate)	C13 H23 N O6	289.152	2.266	4451.58	4762.64	181894	4818.11	2899.53	2771.85	2988.82	4009.79	61944.8	2809.77	3235.22	2820.15	2867.41	6418.8	133272	25793.8	173184
M_1405	Glutaric acid	C5 H8 O4	132.042	1.414	38303.4	53792.7	20536.6	99167.2	62077.9	51964.8	63389.2	89414.8	81136	82924.8	91245.8	181873	43626.2	51031.4	78706.1	33927.7	38475.5
M_1406	1498	C10 H21 N O	171.162	8.59	52543.2	60647.4	85872	54404	64340.6	120904	54143.8	61778.7	50697.9	91671.2	68773.9	92234.4	40361.3	47100.4	37031.8	50317.2	74080.9
M_1407	1-(4-tert-butylcyclohex-1-en-1-yl)pyrrolidine	C14 H25 N	207.199	8.665	118200	104744	145035	92137.2	68738.7	99307	89345.4	94281.7	109609	146569	95988.8	67899	55961.6	62630.3	43790.1	98598.5	34562.5
M_1408	2,2'-Methylenebis(4,6-bis(1,1-dimethylpropyl)phenol)	C33 H52 O2	480.395	10.45	10814.7	11775.9	11339.3	9729.15	9189.74	8357.66	9082.47	9099.2	10752.3	9147.71	7839.18	8541.99	7380.03	7764.68	8661.63	8943.42	7360.73
M_1409	OB4520000	C10 H9 N O	159.068	3.503	57852.9	169184	94620.5	61656.2	144811	181350	100513	60805.1	90076.5	112561	101896	122296	81431.7	71754.7	80442.2	59493.5	98018.4
M_1410	3854	C5 H12 O S	120.061	0.807	67777.5	180944	64525.7	79215.6	70132.5	66337.4	88106.6	168987	81049.5	70162	89924	61468.5	140071	89643.2	29969.6	45621.7	57878
M_1411	2-Methyl-2-propanyl (2,4,6-triamino-5-pyrimidinyl)carbamate	C9 H16 N6 O2	240.134	8.17	3152.62	3256.43	3248.22	12709.9	2950.23	3084.49	3024.71	8588.71	11994.6	9405.71	3316.4	12783.7	2275.16	7852.33	2160.25	2218	7106.43
M_1412	N-Boc-3-Pyrrolidinone	C9 H15 N O3	185.105	7.007	4854.56	14863.6	16415.2	18746.1	72172.9	180756	16243.7	10454.6	4461.54	9923.04	65975.1	15272	5443.23	13130.8	114522	66860.4	33190.9
M_1413	3,4-Diethoxyphenylacetic acid	C12 H16 O4	224.105	7.799	7155.78	6723.65	7176.95	7219.25	145540	21134.2	90432	21034.4	180728	57921.6	163521	29868.8	121850	6019.73	4816.19	4782.58	5058.38
M_1414	DO0750000	C15 H24 O2	236.178	9.192	79672.6	127877	53766	180498	21116.9	15352.1	17815	45583.4	40913.8	64273.1	80025.9	27290.6	45701.5	32567	18476.5	26795.9	23948
M_1415	Pyrazine, (chloromethyl)-	C4 H3 Cl N4 O2	173.994	2.433	180365	49408.8	150127	13897.6	13698.4	89724.9	34368.6	29998.9	20880.6	30971.6	26855.9	29623.3	15624.6	23659.9	14317	22253.5	15472.4
M_1416	1-Benzosuberone	C11 H12 O	160.089	8.766	32780.6	75778	61740.3	18167.1	122062	140527	77598.5	122169	82270	93885.5	119353	180052	56286.6	112280	91546.7	70395.6	73221
M_1417	BRD32048	C16 H22 N6 O	314.185	8.922	6706.55	12952.9	19927.7	180048	16279.4	6295.01	15481.9	16558.6	18345.4	21542.1	22618.8	8939.95	21478.5	7209.81	10805.2	5357.65	15361.6
M_1418	13-Hydroxyoctadecadienoic acid	C18 H32 O3	296.235	9.146	179805	99042.2	51247.1	51215.5	45340.7	39607.8	41869.3	44405.6	67448.7	45876.9	60646.3	46889.2	52749.7	42879.3	57064.9	27276.9	65934.5
M_1419	4149853	C21 H41 N O4	371.303	9.645	1792.82	34704.6	3348.58	3535.83	89934.2	60700.9	88323.9	74313.2	35453.6	59587.5	59512.7	41170	41745.8	3955.85	70824.3	56609.1	41114.3
M_1420	4-Aminopyrazolo[5,1-c][1,2,4]triazine-3-carbonitrile	C6 H4 N6	160.049	10.656	3501.18	66434.4	5703.71	63327.8	4737.31	108125	4849.32	118004	7129.29	134785	2192.5	23520.9	2481.3	179507	28623.2	9338.69	14245.6
M_1421	3,6-Dihydro-1H-[1,2,5]oxadiazolo[3,4-b][1,2,3]triazolo[4,5-e]pyrazine	C4 H3 N7 O	165.04	2.872	27722.5	179379	49862.7	68508.1	8241.92	29807.8	29716.2	3485.42	3315.56	22768.3	17944	3941.2	41932.1	110221	3552.35	4009.89	850.129
M_1422	Paracetamol	C8 H9 N O2	151.063	7.25	178923	138177	146268	40132	5465.55	12990.4	40426	16318.6	21367.9	35458.4	11645.3	8248.26	27314.7	18007.9	30284.7	26768.8	30402.8
M_1423	2616	C12 H19 N O3	225.136	6.58	36460.8	74325.6	64862.4	178906	19643.3	12913.9	23960.1	38285.6	27477.1	27086.3	47897.5	14060.6	34799.9	6891.71	13628.7	2482.36	26209.1
M_1424	Decanoylcarnitine	C17 H33 N O4	315.241	7.635	70213	117262	74143.2	65535.6	44254	43856.1	117505	92470	126656	178592	148354	92655.2	78392.5	89677.4	17548	9325.18	49522.5
M_1425	5-Hydroxy-DL-tryptophan	C11 H12 N2 O3	220.085	1.238	28950.1	38841.7	51035.6	16917.8	54081.7	80695.7	59247.5	15510.7	11446.1	28411.7	30452.9	36388.9	28994.6	82031.3	96137.2	65827.1	178076
M_1426	n-hexyl-1h-purin-6-amine	C11 H17 N5	219.149	7.952	4302.44	17124.4	5635.74	8872.2	14750.4	13553.8	16517.4	17478.9	20222.9	20702.3	18418.1	9497.35	8445.38	177989	12955.6	24984.2	29899.1
M_1427	DL-Glutamine	C5 H10 N2 O3	146.069	1.012	3714.86	7817.07	120412	27811.1	125813	13350.2	9982.99	5136.71	4537.67	4337.73	20577.5	4284.81	177828	6713.2	54218.2	4312.11	4359.02
M_1428	Trimethoprim	C14 H18 N4 O3	290.134	3.397	6300.73	90134.4	16753.5	57928.3	7584.46	8801.64	9144.55	78215.1	177380	7392.19	6935.23	7647.61	7124.38	7685.83	6973.98	7895.36	8516.78
M_1429	DL-Carbidopa	C10 H14 N2 O4	226.095	2.975	7956.12	10156.2	7155.39	7656.7	9668.04	7711.66	18311.4	7528.25	6544.23	6549.89	7970.61	6805.98	8291.98	176714	64934.6	103893	47261.1
M_1430	2,2'-(1H-1,2,4-Triazole-3,5-diyl)dipyrazine	C10 H7 N7	225.077	1.859	165299	135486	104330	176618	56616	27173.8	64621.1	49072.3	54454.5	85228.8	41911.6	66615.2	82163.7	11625.3	39717.2	41715.2	27400.8
M_1431	Boc-Pro-Pro	C15 H24 N2 O5	312.167	8.453	96080.1	44159.7	134500	176311	5030.83	76731.3	30890.7	133525	39062.2	66494.6	87180.5	70820.1	6314.67	39073	54037.9	53141.3	66512.5
M_1432	1',3'-Dimethyl-1,4':5',1''-terimidazolidine-2,2',2''-trione	C11 H18 N6 O3	282.145	7.443	27622.5	26851.8	30955.4	4533.84	2192.24	30077.4	28108.5	26593.3	32061.5	176079	28799.5	3145.53	18353.4	13433.3	1665.78	9799.27	2166.01
M_1433	2,7-Dimethoxynaphthalene	C12 H12 O2	188.084	8.141	26240.8	38235.8	14759.3	26699.4	39245.3	34829.8	51515.4	35600.8	19830.9	55219.9	35981.2	54489	23396.5	153521	71207.8	52717.5	106758
M_1434	N-1H-Tetrazol-5-Yl-Guanidine	C2 H5 N7	127.061	0.952	6037.47	6009.53	6044.37	6450.23	6916.8	6647.78	6638.07	6153.09	6546.66	6592.64	6584.08	6654.33	6765.75	6724.3	6694	6748.31	6571.56
M_1435	L-Histidine	C6 H9 N3 O2	155.07	1.4	55023.8	29888.8	55008.8	44485	91012.2	30417	78139.2	38008	70599.9	98299.2	175239	73190.6	110269	32197.8	38244.6	15996.7	33846.2
M_1436	[(2R,3R,4R,5S,6R)-3-acetamido-5-[(2S,3R,4R,5S,6R)-3-acetamido-4-hydroxy-6-(hydroxymethyl)-5-[[(2R)-2-hydroxy-3-[oxido-[(2S,3R,4R)-2,3,4,5-tetrahydroxypentoxy]phosphoryl]oxy-propoxy]-oxido-phosphoryl]oxy-tetrahydropyran-2-yl]oxy-4-hydroxy-6-(hydroxymethyl)tetrahydropyran-2-yl] [oxido-[(2Z,6Z,10Z,14Z,18Z,22Z,26Z,30Z,34E,38E)-3,7,11,15,19,23,27,31,35,39,43-undecamethyltetratetraconta-2,6,10,14,18,22…	C79 H132 N2 O29 P4	1696.78	4.617	1894.73	8465.3	1787.5	28479.6	169686	93898.1	70713.5	94527.8	174448	51176.1	99754.4	65200.6	127368	17858	21829	10247.8	38346.4
M_1437	PYRIDOXAMINE	C8 H12 N2 O2	168.09	2.91	87304.4	52836.1	104897	41861.4	30393.9	174405	47202.2	24935.1	19581.9	55537.4	87445.9	99567.7	107468	37652.5	75581.7	78102.6	46629
M_1438	Oleic acid	C18 H34 O2	282.256	10.535	8971.87	78848.9	17097.7	19486.1	61463	59819.4	58273.7	56532.9	53734	174305	75723.2	29910.8	89616.3	53021.8	49240.5	6108.06	22342.8
M_1439	6132055	C19 H36 O3	312.266	8.889	32282.9	30606.6	28608.8	35822.8	32089.8	37042.4	24089.1	39945.4	29381	30256.9	30052.6	35843.4	24858.8	34230.3	2679.55	29834.3	27366.9
M_1440	DL-Cerulenin	C12 H17 N O3	223.12	1.56	42480.4	1919.73	4177.29	42075.1	28083	2567.2	30153.9	28754.4	31091.7	33739.4	1665.01	31741.3	1733.67	42819	27779.3	26882.3	25502.5
M_1441	Capsi-amide	C17 H35 N O	269.272	9.283	172971	150719	152788	148398	157733	158961	105294	141530	170827	124133	135382	105317	124840	125539	111456	156432	100614
M_1442	1,2-Diphosphocine	C6 H6 P2	139.995	0.813	5175.22	8100.12	4450.54	4113.73	8935.7	4546.2	23386.1	170357	10488.1	17068.1	13807.5	16934.5	140753	12309.3	14126.9	172632	1871.7
M_1443	hodgkinsine	C33 H38 N6	518.318	10.75	38241	5823.95	6465.15	15956.1	49502.5	41334.1	42476	48342.1	35217.8	59787.2	40973.4	21769.1	43275.1	14765.3	22920.8	34272.4	24425.9
M_1444	7098783	C14 H18 N2 O4	278.127	6.371	43347.3	25761.7	61325.7	33649.1	93235.1	172368	92619.9	24022.4	948.039	12999.1	17254.7	141795	37478.4	2489.14	7234.69	11796.4	5317.48
M_1445	1,1-Dichloro-4-methyl-1,3-pentadiene	C6 H8 Cl2	150.001	10.909	9682.57	171180	37404.3	22866.7	39018.8	32011	20993.8	32773.8	45828.1	32569.3	38448.1	47931.4	34382.8	5823.25	45862	44394.6	45512.3
M_1446	7,8,9,10-Tetrahydrobenzo[b]naphtho[2,3-d]thiophene	C16 H14 S	238.082	11.471	13864.3	13320.7	15354.2	12253.5	11491.3	11364.1	10298.2	2683.75	12828.2	11873.4	21451.3	171069	15315.6	157899	11303.2	11663.4	15827.2
M_1447	Octahydro-1,2,8-indolizinetriol	C8 H15 N O3	173.105	6.433	30678.2	25127.4	46663.5	50543.9	28961.2	35096.3	39996.4	22029.8	14522.3	13330.4	21108.9	27474.4	24996.6	170911	57692.1	57457.3	62634.7
M_1448	val-val-ile-ala	C19 H36 N4 O5	400.269	6.502	4890.61	170535	19067.3	5673.99	1508.99	1558.75	1512.14	1502.66	1493.3	1128.43	1535.52	1458.9	1448.93	1593.49	1559.41	1512.54	1499.35
M_1449	2-(2-(4-Nonylphenoxy)ethoxy)ethanol	C19 H32 O3	308.235	8.993	4287.84	2722.88	17106.3	170376	16363.9	9410.48	8038.37	10492.4	15474.1	5215.83	8987.47	3844.36	10469.3	2859.79	8245.71	9114.23	12500
M_1450	(Dimethylamino)methyl dimethylcarbamodithioate	C6 H14 N2 S2	178.061	3.864	27650.2	64463	41927.7	48406.2	133196	133894	143943	130882	107968	125756	170290	117835	86213.6	32362.2	22203.7	45425.1	37772.5
M_1451	LysoPC(22:1(13Z))	C30 H60 N O7 P	577.411	10.507	5770.23	6215.88	163763	144450	112086	98675.3	78751.1	121971	169108	74762.8	94022.9	110318	109096	170165	20293.8	2393.85	28794.5
M_1452	Benzyl vinyl ether	C9 H10 O	134.073	8.714	170074	43108.3	49939.9	37922.8	4774.82	36735.5	34495.7	45277.6	43243.2	45732.9	35733.7	39928.1	35818.1	22779.7	37476	36202.8	44339.6
M_1453	2,2,2-Trichloroethyl 3-[2-(bromomethyl)-4-chloro-1,3-oxazol-5-yl]-2-chloro-1H-indole-1-carboxylate	C15 H8 Br Cl5 N2 O3	517.816	10.207	169496	143787	117812	122209	142906	116407	97842.2	113654	76188.5	103291	101321	113011	106441	51597.9	96596.8	114355	56880.3
M_1454	DIETHYLENE GLYCOL PALMITATE	C20 H40 O4	344.293	10.125	167191	152438	154996	93160.7	76709.3	69796.4	85462.9	147389	127192	69191.5	92483.7	93626.7	70947	169431	127727	87606.9	78566.5
M_1455	Phenolate	C6 H5 O	93.0346	8.664	53081.4	33112.4	80849.3	36100.7	83453.1	34343.3	74909.4	22965.1	64899	169275	26549.7	31175.2	19249.7	34126.8	23004.1	45981.2	49975.8
M_1456	1,1,1-Trifluoroacetone	C3 H3 F3 O	112.014	1.245	16516.1	14799.3	13856.3	17000.1	20161.2	139824	17246.7	19261.9	18142.8	16031.8	18136.3	10468.5	11068.6	6066.83	4619.99	16357.8	5972.65
M_1457	Norharman	C11 H8 N2	168.069	4.009	36449.7	53348	35968.8	168679	12852.4	10613.3	14894.1	19436	17825	12811.7	14987.4	20506.4	13001.1	3262.73	2374.06	2393.41	2447.05
M_1458	4-Nonanoylmorpholine	C13 H25 N O2	227.189	10.229	39040.8	34884.4	35557.5	60388.2	41466.5	99905.2	18320.7	11115.6	3975.51	7623.52	15496.7	85957.1	30123.8	56798.9	83642.7	62880.4	55520.9
M_1459	TX-1041	C4 H6 N6 O	154.061	5.511	80713.2	111133	88292.4	91522.1	51415.8	77394.6	103424	63041.2	60169.1	92064	86841	38531.2	116764	159661	130975	78195.9	167902
M_1460	ARECOLINE	C8 H13 N O2	155.095	6.743	25494.4	10859.5	54754.6	40917.4	33335.6	63005.6	38284.7	16746.3	12410.2	12929.1	22527.3	45283	14719.2	167614	6469.66	7462.04	44405
M_1461	2-{[(Acetylcarbamoyl)oxy]methyl}-2,3-dimethylbutyl acetylcarbamate	C13 H22 N2 O6	302.149	8.583	45795.6	46992.6	34779.6	57007	80017	50264	66576.3	54670.6	52075.7	58716.9	47017.1	52866.8	22502.8	167381	20997.2	50313.5	19489.1
M_1462	Ethyl 4-Quinazolone-2-carboxylate	C11 H10 N2 O3	218.069	1.549	73317	100091	77909.8	8063.13	146062	167350	143489	76701.8	49685.4	86985.5	76842.5	72677.3	59479.2	58742.1	112539	124127	92567.7
M_1463	2616	C12 H19 N O3	225.136	6.881	2845.97	68504	2138.65	167323	2215.01	2265.73	2243.23	2195.09	2191.15	1935.89	8174.29	2136.49	2273.41	2192.65	2234.55	2347.38	3537.63
M_1464	Triethylamine	C6 H15 N	101.121	0.598	1099.6	5949.31	16.3009	5112.57	5702.59	265.179	1732.58	9809.59	167214	16429.3	4619.34	17317.6	1772.61	8882.9	10084.4	9716.16	11827.3
M_1465	4,6-Di(1-piperidinyl)-1,3,5-triazine-2-carbonitrile	C14 H20 N6	272.175	9.079	81744.1	128590	12066.6	153357	73993.6	167170	45975.1	129904	74637.6	43096.4	50989.8	109462	42478.6	17895.5	59415.7	102886	97403.1
M_1466	MFCD00041564	C11 H22 O3	202.157	8.797	41176	23495.2	10564	28387.7	14845.9	57957.7	9565.48	18519.4	18984.7	22914.2	32973.4	28094.9	28541.4	47487.2	110193	97277.3	113349
M_1467	2512	C14 H24 O2	224.178	8.979	33911.6	48989.3	41481.3	41619.3	37887.5	41527.4	3800.68	4367.66	4378.55	39282.1	40760.4	42744.8	38904.2	166752	39306.8	31799.1	44109.7
M_1468	5-(4-Methylphenyl)-1,3-cyclohexanedione	C13 H14 O2	202.099	8.763	55337.5	70494.9	94206.1	51689.8	123120	166230	105888	97993.2	97991.2	98522.6	105093	166305	76193.7	44459.2	85971.1	90863.2	87815.8
M_1469	MFCD00029794	C22 H41 N O3	367.308	9.312	51827.8	165984	122334	108049	22767.7	148838	43363.9	29258.3	19837.3	4270.84	37814.5	9986.01	56390.7	29901.4	116864	40025.4	54044.3
M_1470	3-Methoxy-23,26-epoxylanosta-7,24-dien-26-one	C31 H48 O3	468.358	9.6	99599.2	165237	122976	43008.6	41887.9	2652.86	2122.68	32710.9	108134	55112.4	42065.4	17409.2	23191.5	24740.1	4960.72	4838.77	5861.11
M_1471	1422990	C9 H19 N O2	173.142	1.207	164583	30057.1	60156.2	109887	10962.2	12636.3	13076.1	11040.6	10291	11298	11010.4	12459.7	11373.3	13852.6	13225.6	13404.1	14022.1
M_1472	2-Hydroxyquinoline	C9 H7 N O	145.053	6.338	163989	42018	51049.5	19123.3	22854.7	98375.5	38921.7	17992.2	57316.9	27180.6	90928.4	61028.6	75413.6	140749	46699.3	79210.5	111143
M_1473	1-(4-Nitrophenyl)piperidine	C11 H14 N2 O2	206.106	2.163	14944.1	30512.2	10532.1	3242.87	32127.8	15528.1	32140	30292.4	29870.3	57893.8	25956.3	46868.8	48740.2	28221.5	20659.2	4091.78	3269.57
M_1474	5,5'-(1,3-Propanediyl)bis(1H-1,2,4-triazol-3-amine)	C7 H12 N8	208.119	4.767	24379.6	31850.8	14923.8	23667.7	28174.2	163550	14271	32832	22691.7	79577.8	72848.9	24782.8	29439.5	34676.6	44365	37279.6	44531.3
M_1475	benzyl phenyl sulfone	C13 H12 O2 S	232.056	1.137	97169	152985	88898.5	120497	90820.2	79764.7	102495	120015	110866	99906.6	163360	87337.1	89119.6	112234	110864	157651	97315.8
M_1476	DL-Lysine	C6 H14 N2 O2	146.106	1.865	26889.8	32706.2	46596	32399.4	20982.1	29189.8	20850.6	15828.6	15382.4	20404.5	19602.6	57197.8	19720.5	163201	32463	32955.5	51056.9
M_1477	Indole-3-lactic acid	C11 H11 N O3	205.074	5.127	141733	71738.4	103184	162461	7452.09	7016.98	14238.4	30227.7	30281.3	23382	33868.5	35539.8	56533.3	7248.12	8932.3	12667.8	8273.85
M_1478	4-Nitrophenyl caprate	C16 H23 N O4	293.163	4.45	29633.5	2252.85	162452	2959.42	4430.15	80413.3	89461.8	2711.89	3330.51	11512.9	8774.66	43736.5	2867.38	3569.46	13111.1	11578.2	28420.8
M_1479	Z-Asn-Oh	C12 H14 N2 O5	266.09	5.158	1992.83	1885.39	1833.82	1837.4	1785.85	1918.18	1843.16	1870.9	1910.02	1878.97	1892.61	1856.53	1881.03	162343	4457.52	20027.6	8059.87
M_1480	Nicotinuric acid	C8 H8 N2 O3	180.054	4.603	3919.29	10594.2	7059.22	6363.72	6976.88	7366.72	8492.19	2971.4	2128.33	2966.37	2365.92	2273.62	2146.85	162189	11790.5	49709.6	7324.26
M_1481	4,4'-Methylenebis[2-tert-butyl-6-(.alpha.-methylbenzyl)phenol]	C37 H44 O2	520.336	9.271	4854.86	162069	12641.9	11500.3	4319.24	9877.25	7989.59	5982.14	6107.07	4347.25	4015.36	1335.57	4334.64	736.513	3536.59	4838.37	4270.13
M_1482	Desmethylmisonidazole	C6 H9 N3 O4	187.059	1.92	22944.8	7447.87	9583.02	161813	6098.82	7249.4	7632.71	6534.62	5986.38	6762.41	7285.89	7154.6	6562.34	11817.6	7904.3	7240.15	7952.79
M_1483	Ethyl [2-methyl-4-(1-piperidinylmethyl)-1,3-dioxolan-2-yl]acetate	C14 H25 N O4	271.178	8.668	40799.5	27287.6	59270.1	92953.4	45430.5	27974.4	61354	40795.7	32067.1	93447.6	27846.4	20926.2	27692.2	153256	95717.7	52799.1	161795
M_1484	Clofilium	C21 H36 Cl N	337.259	8.639	9302.15	2800.27	7816.95	2790.6	161708	11295.7	110674	6453.81	2430.2	6912.3	9104.21	2569.52	2182.94	7654.99	2001.7	6322.76	3845.99
M_1485	2491	C5 H6 O2	98.0373	0.597	5732.15	10583.1	4008.22	161613	9685.66	6010.77	10956.9	4480.75	5679.82	138605	17184.9	15509.7	6436.04	16358.6	11523.8	131590	16907
M_1486	MFCD00002731	C12 H21 N O2	211.157	8.108	43729.6	53888.8	67991.7	68746.5	132633	161573	103156	52776.9	46606.3	77376.8	76425.8	52431.6	62809.8	38096.2	43267.5	36623.4	33929.2
M_1487	methylthiomethyllithium	C2 H5 Li S	68.027	1.152	53344.1	97699	68819.2	103315	95553.8	79873.3	86721.3	70230.5	47661.5	51035.4	160770	58837.6	112433	14116	5031.98	45506.7	13222.7
M_1488	DPTH	C15 H12 N2 O S	268.067	1.219	9264.97	11189.8	6531.74	16287.8	27571.4	6824.81	35337	20456.2	37218.9	31687.6	30849.3	26027.2	20525.6	160085	49990.6	83857	46624.3
M_1489	Deferiprone	C7 H9 N O2	139.063	3.041	2501.04	11300.6	11273.2	2168.94	10982	13119.9	10883.8	11313.7	8574.6	12630.9	11459.3	12582.1	2105.85	159910	15427.7	21394.3	2240.13
M_1490	1-Carbethoxy-4-aminopiperidine	C8 H16 N2 O2	172.121	2.83	19593.3	61469.1	33310.6	34150	10509.7	9431.64	12055.7	23605.3	159857	86659.9	38303	24019.6	122753	22777.4	47746.6	41474.9	81513.9
M_1491	Indole-3-carbidol	C9 H9 N O	147.069	7.404	49998	18765.5	159841	156634	32933.6	76885.3	18876.5	6571.39	4634.95	16902.7	4901.75	5517.64	28100.3	3033.33	4577.67	37762.1	6580.52
M_1492	Bis[(2-isopropyl-5-methylcyclohexyl)oxy](2-methoxyphenyl)phenylsilane	C33 H50 O3 Si	522.352	10.333	74893.7	93078.3	68746.9	59679.8	122655	81465.6	112101	89079.1	72426.6	159270	84361.5	133939	126638	25743.5	70901.5	35849.1	23881.8
M_1493	GX1529000	C7 H15 N	113.121	8.125	98517.5	91563.4	113122	118631	141146	136039	136898	97397.2	96656.2	126350	130852	158466	107279	103235	35174.9	28871.8	74311.1
M_1494	5-Hydroxy-DL-tryptophan	C11 H12 N2 O3	220.085	3.514	41375.9	61779.6	83788.8	86834.4	124610	129834	109747	117467	128757	135306	110102	81230	115967	69720.9	63886.6	110853	122300
M_1495	4-Morpholinylacetic acid	C6 H11 N O3	145.074	1.132	16688.5	60695.7	56479.4	58188	29016.1	41862.6	57281.3	118871	45074.7	38696.5	34051.6	69085.8	39622.4	157987	86403.7	64473.1	80770
M_1496	2-Methyl-2-propanyl N-[(benzyloxy)carbonyl]leucyl-O-benzyltyrosinate	C34 H42 N2 O6	574.304	9.828	6010.06	2519.62	4710.75	24408.1	14288.4	5374.43	45691.7	36808.7	11709.2	4116.91	6146.27	64174.5	24696.1	1167.17	6232.38	5894.86	2252.15
M_1497	butanethiol	C4 H10 S	90.0507	0.74	86881.3	130621	96140.9	134657	148017	114636	118124	78161.4	150212	134406	157782	98277.4	81625.3	107174	86669.1	132862	132519
M_1498	1-Boc-4-piperidinol	C10 H19 N O3	201.136	6.906	14251.5	13428.5	9167.41	18104	123472	75970.4	157554	13949.3	24935.7	62655.7	32538.1	13169.3	19277.4	18043	14443.8	26080.8	23422.4
M_1499	2,4-Bis(dimethylamino)-6-nitro-1,3,5-triazine	C7 H12 N6 O2	212.103	7.55	24192.4	52002.8	27662.4	15600.5	63565.5	756.772	31320.7	743.134	700.426	90650.8	157509	31116.3	18303.8	520.787	550.633	13704.6	502.459
M_1500	1-[(Boc)amino] cyclopanecarboxylic acid	C9 H15 N O4	201.1	3.316	8878.8	10889.3	11960	16609	59366.8	14119.8	39345.7	32377.1	28491.1	31896.8	54834.6	21147.4	20076.1	157187	137026	138930	106525
M_1501	3-Phenylpyrazole-4-carbaldehyde	C10 H8 N2 O	172.064	2.005	26940.9	22247.3	15154.5	157183	13901.1	6544.22	12374	14542.1	24763.7	18909.9	22102.2	22283.3	16246.2	9347.77	5965.91	5700.11	6679.65
M_1502	2-Heptadecyl 1-isobutyl 1,2-pyrrolidinedicarboxylate	C27 H51 N O4	453.382	8.513	16363.1	26960.5	9289.22	26167.8	57193.8	23211.3	53431.3	6765.47	17074.8	85403.6	138294	125415	130095	119514	23449.2	4636.52	156744
M_1503	TRIS(HYDROXYETHYL)AMINOMETHANE	C7 H17 N O3	163.121	0.955	5051.8	38168	5057.57	5397.16	5787.57	5562.46	98915.6	5148.54	5482.46	5516.33	5509.17	25486	5661.18	28278.2	156021	87732.9	42076.1
M_1504	4-Aminopyrazolo[5,1-c][1,2,4]triazine-3-carbohydrazide	C6 H7 N7 O	193.072	3.66	155594	45670.4	110040	89543.7	18141.5	42871.6	42994.9	31622.2	45456.3	65059.5	41162.6	47350.4	26086.8	3406.53	4150.16	5209.46	3373.76
M_1505	4-((2-oxohexadecanoyl)amino)butanoic acid	C20 H37 N O4	355.272	7.905	5508.3	15565.9	2524.78	3890.09	7385.21	2640.03	8024.91	6312.21	9503.23	13524.4	8272.62	2705.25	4774.65	155503	6778.35	3817.19	11118.5
M_1506	Ethosuximide	C7 H11 N O2	141.079	1.457	154563	138721	114480	109831	70266.4	95611.1	74789.3	47510.7	57068	134135	64348.1	64771.2	29383.4	81881.6	59314	45430.2	82538.9
M_1507	Icaridin	C12 H23 N O3	229.168	6.781	16846.4	17662.6	10252.1	154321	14994	13648.1	2446.9	12983.3	17293.8	10059.9	12375.4	13573	12433.9	10249.2	14722.9	9231.06	2671.33
M_1508	uronium	C H5 N2 O	61.0395	1.204	48104.6	126649	59304.7	40365.2	62187.1	90580.9	72152.5	86115.5	40607.7	93476.9	59152	85091.6	76880.8	98956.8	153624	98927.3	31096.6
M_1509	N,N'-Diheptyl-3-hydroxy-N,N'-dimethylpentanediamide	C21 H42 N2 O3	370.319	9.07	14601.6	40734.3	9160.61	12661.8	4452.89	8077.88	6561.38	7444.19	154239	8039.89	2741.54	23212.5	7321.1	6626.27	7012.71	10338	10667.6
M_1510	N.pi.-Methyl-L-histidine	C7 H11 N3 O2	169.085	1.396	12151.4	12595.8	13761	9641.91	95510.9	136274	78766.4	43286.6	145026	102351	92317	58591.9	154138	25406.2	37817.1	12048.5	51982.1
M_1511	Glycylglycylglycine	C6 H11 N3 O4	189.075	1.818	31893.7	153755	26312.8	55536.8	33517.3	40189.1	75253.7	53845.9	35558.9	37845.8	111941	42056.5	64595.4	95699.4	106267	40614.8	66513.8
M_1512	SL4860000	C13 H20 O2	208.147	8.097	32196.2	36107.2	31646.9	153171	2758.37	30552.9	28868.6	2687.77	12081.6	3714.7	8690.09	29455	22959.2	29579.3	8579.16	10539.3	7558.15
M_1513	4,4'-(1-Methyl-1H-1,2,4-triazole-3,5-diyl)bis(1,2,5-oxadiazol-3-amine)	C7 H7 N9 O2	249.073	1.104	57528.7	49349.8	53495.3	52913	79355.7	58508.3	71378.9	65959.9	74546.4	56633.4	98216.5	85328.9	46483	72932.2	59569.1	153137	67174.6
M_1514	(E)-Dacarbazine	C6 H10 N6 O	182.092	5.508	4289.39	27452.4	30987.5	20491.4	34319	22242.8	27026.2	32200.2	40767.4	9467.38	32446.6	29033.5	2961.31	4455.15	21145.2	152666	51618.6
M_1515	7-Methoxy-3-(tetrahydro-2H-pyran-2-yloxy)crinan-1-ol	C22 H29 N O6	403.2	8.325	152386	145383	146232	85526.7	127837	136647	127445	130810	100623	145485	116465	136623	72137.8	89082.6	56651	93728.7	72088.1
M_1516	CM0120000	C9 H15 N O	153.115	4.701	3210.52	3815.75	3238.21	2880.94	2868.08	3812.9	2899.18	78350.2	152089	4587.46	11313.8	17721.3	10482.4	4468.47	3186.13	3038.19	3031.8
M_1517	3420	C13 H18 O	190.136	8.568	21724.9	46230	25329.7	21120.2	32467.2	80346.3	26710.7	152051	143139	84258.9	95004.9	83924.6	59066.7	37024.9	29732.2	28259.8	21952.7
M_1518	3-Carboxylato-1,3,5-trideoxy-5-(trimethylammonio)pent-2-ulose	C9 H17 N O4	203.116	7.222	52221.1	35842.8	151875	50918.4	56053.2	98584.5	85734.7	20352.8	6397.24	34985.7	24135.3	61948.3	9813.47	35303	40831.6	84918.5	55658.1
M_1519	5-Indolol	C8 H7 N O	133.053	8.33	9687.79	6813.18	31630.2	5674.28	33500.1	33175	5700.99	18730.5	8601.57	9818.22	30590.7	18104.6	39253.8	151685	38203	81780.9	78242.3
M_1520	3-(5,6-Dimethoxy-2-methyl-1,3-benzothiazol-3-ium-3-yl)-1-propanesulfonate	C13 H17 N O5 S2	331.054	5.012	1783.62	1758.67	1741.02	1724.15	2291.88	5401.29	1724.82	2958.57	1650.62	5142.32	1733.85	1642.11	1806.22	28453.3	6542.49	4317.16	8508.82
M_1521	S-(2-Hydroxyethyl)glutathione	C12 H21 N3 O7 S	351.112	8.564	21877.5	33126.1	18153.5	22336	64879.1	37541.3	41283.5	38020.2	42510.1	22187.8	12745.3	13194.9	63009.7	151476	33836.1	87363.8	7648.76
M_1522	Laurolactam	C12 H23 N O	197.178	8.754	73294.7	97449.5	91988.4	91255.3	92602.9	135358	71130.3	88997.9	95388.2	111421	109705	116967	59095.1	63949.3	38586.4	104922	109925
M_1523	Elaidolinolenic acid	C18 H30 O2	278.224	9.748	28404.2	59454.9	44175.9	65884.2	13688.5	66092	60467.7	150910	11466.6	3291.95	84529.6	54835	102818	51343.6	8775.16	41041.6	19705.4
M_1524	S-(tert-Butyl) 2-tert-butyl-4-(1-hydroxy-1-phenylethyl)-1,3-dioxolane-4-carbothioate	C20 H30 O4 S	366.187	10.019	57231.2	114762	37225.4	21749.1	95975.1	66172.2	62593.5	104698	135235	149378	78593.9	44124.4	78490.1	143223	61878.9	39414.7	44427.6
M_1525	5,5'-methylenebis(1H-benzotriazole)	C13 H10 N6	250.095	1.551	66408.6	79363.5	66249.2	4969.56	100415	126051	109501	58399.9	36071.6	60958.6	61270.7	60256.2	40770.8	51866.1	90643.3	70473.8	78531
M_1526	leu-leu-asp	C16 H29 N3 O6	359.206	5.909	129392	149118	35131.8	24259.4	1269.04	1074.44	1948.75	986.328	2560.72	643.323	2325.58	940.84	2475.15	875.197	853.071	854.106	1049.78
M_1527	N.pi.-Methyl-L-histidine	C7 H11 N3 O2	169.085	1.254	3443.31	4838.86	6817.84	29012.2	2865.63	19159.2	4134.43	3057.97	2743.84	3524.54	3145.1	3089.03	4711.14	149094	4130.68	22609.8	4776.9
M_1528	Gly-Lys	C8 H17 N3 O3	203.126	1.527	7250.35	2113.67	2906.62	2195.97	6721.39	3389.5	4866.28	6433.45	5457.81	5679.37	6876.08	2817.03	8132.51	148937	20301	32077.7	13673.1
M_1529	3-Amino-3-[4-amino-6-(dimethylamino)-1,3,5-triazin-2-yl]-1-propanol	C8 H16 N6 O	212.139	7.343	108530	81097.9	122247	96278.2	145269	117088	148836	140735	132261	92361	132294	126178	29369.1	26903.5	39709.4	42966	48092.2
M_1530	2-(Dibutylamino)ethanethiol	C10 H23 N S	189.156	0.863	142517	84723	148738	63006.8	10072.5	19844.7	20816.9	19321.2	29848.1	13913.8	28875.3	5859.91	22363	31623	9448.34	6278.1	9815.35
M_1531	trans-3-Indoleacrylic acid	C11 H9 N O2	187.063	7.244	64422.7	55291.8	81744.6	67257.7	32394.8	27380.5	24089.6	23335.8	27358.1	36028.6	30058.2	31218.7	10577.7	148557	46505	56102.8	60940.3
M_1532	1-t-butyl-4-ethylbenzene	C12 H18	162.141	8.811	30282.8	15367	28301	8976.66	24243.4	25326	26707.7	31035.7	15707	36366.2	25196.1	20683.6	13925.3	148157	27271.3	21106.5	33018.3
M_1533	(4Z)-4-[Nitroso(1H-triaziren-1-yl)methylene]-4,5-dihydro-1,2,5-oxadiazol-3-amine	C3 H3 N7 O2	169.035	1.418	1490.08	141856	37484.8	2729.1	92873.4	3911.52	27949.2	55325.2	145236	34499.2	68147.3	31873.5	16676.6	23670.2	51125.5	2822.28	8955.24
M_1534	5-Methyl-1H-pyrrole-2-carboxylate	C6 H6 N O2	124.041	0.793	124694	83056.1	107086	147917	34136.2	52476	33585.8	23020.5	9066.21	20944.1	17729.1	22797.9	20104.8	100052	52589.9	35789.8	88961.3
M_1535	AZA-21-CROWN-7	C14 H29 N O6	307.199	8.181	100919	115793	121284	115625	98023.9	147916	95702.3	90840.8	111830	28242.4	102670	105186	59210.9	65553.5	60838.9	54083.8	54197.4
M_1536	dimethyl itaconate	C7 H10 O4	158.058	7.054	21331.3	19129	2758.69	60137.8	147698	18951.3	11337.7	23844.5	21885.3	4259.28	49044.5	17631	7696.97	13336.7	13560	20289	5438.04
M_1537	2-Indolinecarboxylic acid	C9 H9 N O2	163.063	4.738	59341	84421.3	147517	76433.9	45335	73780.3	23554	39661.3	10542.4	59573.8	5529.67	10788	119572	36498	19053.5	104406	3443.13
M_1538	melamine	C3 H6 N6	126.066	2.681	13641.1	6104.7	15484.4	4491.67	7648.58	4859.59	14679.4	5262.72	37966.9	15496.3	17655.2	11169.2	3657.59	11943.1	25802.6	7082.94	5264.82
M_1539	.alpha.-Aminoadipic acid	C6 H11 N O4	161.069	1.202	147341	21983.8	107399	16190.7	36740.3	31864.9	44597.8	14850.7	22076.8	18630	13234	49176.2	19334.2	15523.7	42287.1	15622.9	40533.2
M_1540	9-Hydroxy-5,6-dimethyl-3-[(5-phenyl-2-pentanyl)oxy]-5,6,6a,7,8,9,10,10a-octahydro-1-phenanthridinyl acetate	C28 H37 N O4	451.27	9.183	40457.2	147229	38268.8	14447.7	70388.2	45244.1	84531.6	48425.4	58267.4	104621	40039.2	48691.5	45956.3	6524.96	54870.2	37471.7	89256.6
M_1541	1-[(3R,6R,7S)-4-(N,N-Dimethylglycyl)-7-methoxy-3,6,9-trimethyl-10-oxo-3,4,5,6,7,8,9,10-octahydro-2H-1,4,9-benzoxadiazacyclododecin-12-yl]-3-phenylurea	C28 H39 N5 O5	525.297	10.243	147103	52272.3	97671.7	42281.1	20811.2	37767.1	25281.8	56150.7	60862.1	19755.4	53935.5	44165.5	39943	35866.5	44162.7	10953.1	35169.7
M_1542	CU5250000	C8 H5 N O	131.037	6.538	146850	1359.9	1881.04	128932	259.731	324.312	189.027	662.909	233.789	218.906	386.567	517.017	12416.9	210.45	583.785	212.659	562.929
M_1543	N.pi.-Methyl-L-histidine	C7 H11 N3 O2	169.085	1.548	32472	28070	24894.4	34205.9	113457	18116.9	33544.6	21673.7	90953.2	90078.7	88229.6	15562.4	34452.9	48858.1	43270.8	85116.7	91554.2
M_1544	Valyllysine	C11 H23 N3 O3	245.174	0.834	146620	100566	129210	72344.3	14336.7	26323.2	40264	44735.1	39613.9	39929.9	35094.1	29548.6	22142.5	65638	31195.7	23502.7	34547.3
M_1545	trimethadione	C6 H9 N O3	143.058	2.504	20726.9	23713.4	65938.9	22674.2	82481.8	28324.6	107772	117742	18269.6	2203.84	16078.3	71838.5	127306	34091.1	24140.2	16520.6	2129.92
M_1546	MNA	C7 H8 N2 O2	152.059	3.413	28370.7	17240.6	26936.8	22871.4	40786.3	38042.6	45900.6	47392.6	41025	57620.7	29687.4	32724	38928.6	130433	49240.7	50842.2	46747.8
M_1547	2-Hydroxy-3-(palmitoyloxy)propyl 2-(trimethylammonio)ethyl phosphate	C24 H50 N O7 P	495.333	10.586	95358.7	146286	20557.1	76359.3	111893	84233.5	79521.8	91715.3	71254.3	97113.5	8716.4	82444.2	63073	23133.8	38668.8	8855.43	61650.1
M_1548	Phenylphosphanide	C6 H6 P	109.021	1.107	3329.48	1727.44	2325.33	2064.42	88045.1	14304.3	28389.1	46090.1	43684.6	61256.3	40472.5	47415.5	74745.9	146279	4832.04	38733.5	1340.61
M_1549	MTDA	C8 H18 O2 Si	174.108	6.749	21851.7	6286.84	35435.8	28842	22734.9	37108.1	49396.2	13934.9	2282.19	9511.28	5985.78	20426.7	8549.39	145888	34253.7	35840.1	35007.3
M_1550	stearoylcarnitine	C25 H49 N O4	427.366	8.221	3334.39	67394	3173.83	3223.65	5818.75	3159.95	145875	3062.15	3080.83	3336.5	3225.98	3778.71	2216.03	34540.7	28891.9	53634.2	41141.1
M_1551	methylthiomethyllithium	C2 H5 Li S	68.027	0.975	9468.12	9961.83	10195.1	10267	10861.7	10337.2	11046.7	10509.1	10520.7	11106.5	10706	10971	10868.2	11310.3	10934.4	11041	10619.3
M_1552	1-Boc-4-piperidinol	C10 H19 N O3	201.136	8.24	47135.9	145793	33663.6	79129.2	8084.52	19697.2	40701.8	29347.7	28815.8	16914.4	86842.6	10723.5	46057.9	48371.7	9294.46	6274.1	39424
M_1553	1-Boc-3-pyrrolidinol	C9 H17 N O3	187.121	7.565	25934.3	14678.5	11647.2	5417.74	30177.2	58149.9	19682.7	5651.93	12301.1	9736.34	21959.3	45460.5	14704.3	145624	12327.2	12649.8	44582.7
M_1554	2127	C7 H6 O	106.042	9.403	6229.35	145415	137445	5063.13	4809.06	4663.72	4336.14	4655.7	5038.81	4356.48	4391.51	4492.61	4139.07	4433.1	4357.83	4388.74	5414.59
M_1555	Methyl 8-[2-(2-acetamidophenyl)-2-oxoethyl]-3-isopropyl-6a,7,10b-trimethyldodecahydro-1H-benzo[f]chromene-7-carboxylate	C31 H45 N O5	511.328	9.595	145176	57854.9	105181	107975	100880	68284.3	110960	112223	75720.1	90066.3	72493.6	124613	47142.6	27930.4	28357.6	34037.2	114576
M_1556	24FC717FE5	C4 H8 N6	140.081	4.7	10597.7	14634.5	12677.2	11550.3	32695	10881.1	12000.6	14169.7	16478.7	8110.85	22992.1	15279.2	18890.3	28311.8	15875.1	21751	23655.4
M_1557	[[chloro(sulfido)phosphoryl]-ethyl-oxidanuidyl]benzene	C8 H10 Cl O2 P S	235.983	0.598	4017	2012.47	2677.47	5405.5	121102	144566	1444.16	126256	39192.9	8104.94	4843.11	5953.91	9633.68	8267.38	6904.45	95797.3	9255.92
M_1558	N-{1-[4-Amino-6-(dimethylamino)-1,3,5-triazin-2-yl]-3-methylbutyl}leucinamide	C16 H31 N7 O	337.26	8.726	13232.7	2632.66	1830.63	1573.74	144438	7375.66	63882.4	4600.5	2027.76	23222.7	9097.68	1134.78	2593.85	1379.68	4462.87	3399.66	2663.77
M_1559	Dihexyl cyanocarbonodithioimidate	C14 H26 N2 S2	286.154	8.855	105154	104255	94169.6	144311	85786.7	117521	64624.3	81483.8	125693	85305.1	69971.8	90819.9	66420.5	69234	37782.4	104110	87931.7
M_1560	4-Nitroaniline	C6 H6 N2 O2	138.043	1.233	31043.3	48964.3	30499.3	21100.3	32894.1	14139.4	32198.7	40812.3	8739.89	43605	109870	94527.2	13675.5	86887.5	52529.1	9857.05	23156.8
M_1561	hexobarbital	C12 H16 N2 O3	236.116	3.251	45907.6	24129.9	90616.2	23958.3	60489	106019	42460.9	10383.8	2567.48	14340.3	8557.89	143641	88448.1	3534.42	2972.94	3150.99	2966.48
M_1562	Phenethylamine	C8 H11 N	121.089	0.874	6911.8	7614.79	7965.61	6696.61	6592.12	12110.4	143444	5400.26	8760.66	7087.63	11941.8	5328.84	10320.3	8356.94	7590.69	9299.54	7423.29
M_1563	N-Benzoyl-DL-alanine	C10 H11 N O3	193.074	8.268	143013	57316.6	60039.1	50694.5	3422.82	5594.09	13407.9	33475.7	29273.7	30543.6	30716.4	20816.8	13991.1	4232.34	3713.87	3792.33	4301.52
M_1564	4-Hydroxyisoleucine	C6 H13 N O3	147.09	0.956	17082.1	15446.5	24661.1	17048.4	17778.5	17207.7	17062	25188.9	19037.2	17008.5	16923.3	17834	17784.1	17647.6	17205.8	18000.4	17974.9
M_1565	4-(4-Morpholinyl)-6-(4-morpholinylmethyl)-1,3,5-triazin-2-amine	C12 H20 N6 O2	280.165	8.584	19366.5	22763.1	21681.7	142231	11768.1	21690.7	22889.7	21716.1	20836.1	22094.6	19481.5	2038.79	10849.3	4515.69	17387.7	20358.6	18091.2
M_1566	Benzoic acid	C7 H6 O2	122.037	6.062	80813.5	142168	139453	68034.1	47113.2	85553.6	47686.3	18072.1	25787.7	11600.7	25529	30749.3	32490.9	32342	12188	16529.7	11242.3
M_1567	Decyl N-[(allyloxy)carbonyl]alaninate	C17 H31 N O4	313.225	7.473	98857.3	142105	99241.2	111928	50550.4	52832.7	89793.2	63015.7	81332.8	97011.3	94286.3	55859.5	28826.2	84685.7	36476.7	30888.2	12846.5
M_1568	6-Amino-1-ethyl-3-propyl-2,4(1H,3H)-pyrimidinedione	C9 H15 N3 O2	197.116	1.453	120849	141968	112164	14659.4	14384.4	82007.7	30528.3	26860.6	16673	16824.5	15522.1	1434.01	26569.6	4431.13	14810.5	2248.01	3277.55
M_1569	N-(2,1,3-Benzothiadiazol-4-yl)-2-thiophenecarboxamide	C11 H7 N3 O S2	261.002	1.215	14966.3	16819.7	24566.6	23745.8	134734	73997.9	129967	106880	71588.4	33523.1	60637.4	141847	96201.9	13831.8	132442	92166.7	33911.4
M_1570	2-{2-[(4,6-Diamino-1,3,5-triazin-2-yl)amino]ethoxy}ethanol	C7 H14 N6 O2	214.118	5.804	95841.6	116057	106146	107186	89042.1	141681	108602	91158.6	104023	91286.5	102445	100087	83286.9	91004.6	43555.6	129419	94875.3
M_1571	3854	C5 H12 O S	120.061	0.906	55430.8	141653	56293	70323.5	531.518	997.183	1782.12	3289.27	607.612	1477.1	557.901	53893.7	907.358	951.533	1869.64	625.095	534.236
M_1572	Crocetin	C20 H24 O4	328.167	8.424	6406.3	6131.05	6363.95	6349.47	6155.4	6264.69	6216.82	6386.74	6499.65	6587.27	6520.56	6402.76	5524.22	110485	29436.4	115385	60010.5
M_1573	argininamide	C6 H15 N5 O	173.128	0.812	967.875	4935.42	6626.71	8605.07	20389.8	26890.3	26171.8	29295.8	43197.8	48237.2	27274.6	29700	34228.7	141194	57423	12631.4	50649.1
M_1574	Aniracetam	C12 H13 N O3	219.09	7.494	36997.7	9837.84	32452.1	141173	1699.14	1849.55	1832.77	2733.38	6221.86	2449.94	1759.51	1831.26	1679.67	1218.5	1008.84	1309.63	988.749
M_1575	Aceglutamide	C7 H12 N2 O4	188.08	1.41	85272.3	67174.3	74062.6	63101.3	100293	45984.8	100137	79799.9	55077.1	68550.8	141033	60447.7	43216.2	79604	29458	17416.9	72627.3
M_1576	terpendole E	C28 H39 N O3	437.291	9.685	38050.1	78517.3	48532.4	32349.6	60508.7	60418	50095.6	72784.8	45620.3	38787.6	48878.2	61210.8	40926.5	84644.6	140920	87046.6	117536
M_1577	Paracetamol	C8 H9 N O2	151.063	7.377	140881	90079.9	101371	18426.4	2267.48	2218.62	26072.3	16099.4	12126.4	30983.8	7147.29	4735.43	3401.96	12305.7	12096.9	14486.3	18515.9
M_1578	Hypusine	C10 H23 N3 O3	233.174	0.792	140853	46849.6	80593.4	83587.4	2773.41	5357.93	4634.44	2429.15	1920.54	2612.48	2667.94	3904.66	2382.09	5258.7	3932.36	3315.17	5295.25
M_1579	Maraniol	C12 H12 O3	204.079	9.024	6310.18	11798.2	2225.51	6302.83	35778.1	20070.4	5223.71	1648.95	3151.79	3110.28	5818.79	6502.96	13744.4	5664.22	2405.2	695.759	2737.37
M_1580	Guanine	C5 H5 N5 O	151.049	2.252	55572.7	58736.3	55508.5	33663.6	39600	28335.5	99646.4	44302.3	41237.9	28944.1	73927.5	36810.1	34644.5	103212	104423	96729	140286
M_1581	Itaconic acid	C5 H6 O4	130.027	1.608	35841.3	21698.2	42925.6	28402	21805.1	37168.1	29813.8	22040.7	30251.7	53083.9	140241	30279.5	18622.7	4274.6	16874.1	12158.4	60085
M_1582	4-(Heptyloxy)benzoic acid	C14 H20 O3	236.141	8.467	13324.6	7973.01	9068.45	13560.7	728.471	13817.7	107130	920.759	11632.3	5274.45	73427.8	979.94	8851.22	26725.4	111291	9458.5	8598.26
M_1583	LysoPC(20:5(5Z,8Z,11Z,14Z,17Z))	C28 H48 N O7 P	541.315	10.151	139908	91478.7	90160.5	38762.8	74606.5	77936.3	57307.7	89633.5	59470.8	82617.3	61293.7	85337.6	71554.1	24463.2	70689	41528.4	77877.4
M_1584	Gly-Lys	C8 H17 N3 O3	203.127	1.399	6088.82	1593.88	1636.65	1411.96	7337.61	1210.98	7520.86	1531.14	5240.17	2308.32	6226.01	3405.45	5922.27	139479	78323.6	48152.6	9623.54
M_1585	6844478	C6 H13 N3 O2 S	191.073	0.933	21617.8	28849	61611.3	62728.9	28802.2	23537.3	30584.4	29101.5	20653.7	25233.9	24717	50912.4	19378	139421	20099.6	42174.1	22594.3
M_1586	2595	C13 H20 O	192.151	8.311	77961.6	75480.2	100144	106562	66718.2	139375	67105.6	74874.4	58455.3	26176.1	94467.5	55656.2	64510.5	55705.5	60904.3	49337.7	44718.5
M_1587	106330	C3 H4 S3	135.947	0.588	28090	3112.69	6008.51	39514.6	81868.9	8147.3	87308	31270.2	55198.2	137579	74934.9	139161	50612	102869	42905.4	61113.6	36881.4
M_1588	(+)-Nootkatone	C15 H22 O	218.167	9.326	30345.6	6654.98	14244.8	138922	5669.7	3700.58	4289.8	4383.23	15345.8	4257.7	4126.53	4754.15	4015.94	3672.3	4256.17	4339.33	5530.22
M_1589	1H-Imidazole-4,5-dicarbohydrazide	C5 H8 N6 O2	184.071	3.118	138547	73752.4	44997.5	22338	12136.8	12257.4	5691.83	7428.29	18700.3	17542.2	15504.9	26273.4	22920.1	22898.2	15812.5	21933.6	22722.3
M_1590	quinapyramine	C17 H22 N6	310.191	9.025	138366	114054	68552.7	76847.2	53910.7	57798.1	67133.9	38111.1	135165	66408.9	62516.6	59573.5	75028	69905.7	50819.8	52153.6	58230.3
M_1591	(20Z)-20-(Methoxyimino)-3,21-bis[(trimethylsilyl)oxy]pregnan-11-one	C28 H51 N O4 Si2	521.337	9.973	67152.6	57298.3	67400.7	10453.4	14675.1	137964	101695	13308.3	23529.7	82670.8	60629.2	33545.1	65196.3	22761.8	61780.8	21662.9	80359.6
M_1592	3652038	C11 H19 N O4	229.131	1.424	129685	45045.1	126418	85646.6	52564.9	65734.2	59478.2	60736	23516.3	83927.9	103393	81524.6	80472.4	46611.3	62660.1	48502.1	137749
M_1593	3-O-Carbamoyl-2-deoxy-2-[(3,6-diaminohexanoyl)amino]-N-(5-methyl-4-oxo-3a,4,5,6,7,7a-hexahydro-1H-imidazo[4,5-c]pyridin-2-yl)hexopyranosylamine	C20 H36 N8 O7	500.272	9.335	64186	30033	31637.5	6448.52	69804.5	57001.9	127556	68985.1	34976.3	75347.4	61839.6	59955.2	28729.1	9610.16	94591.7	43915.4	76109.5
M_1594	6-aminohexyl phosphate	C6 H16 N O4 P	197.082	1.237	137606	53416.5	27138	18960.3	7385.06	11633.5	9591.92	11963.5	6988.54	6729.96	17544.6	7597.63	7299.23	16177.7	76193.6	14707.1	35397.7
M_1595	5-Nitroxystearic acid	C18 H35 N O5	345.251	8.667	14654.3	5305.96	5058.43	137226	11043	5591.01	5450.58	6316.02	4724.05	5403.85	4227.98	6408.73	4685.17	3903.65	2923.7	4342.14	4853.55
M_1596	FOSAMINE	C3 H8 N O4 P	153.019	1.139	137036	50865.6	100619	7861.79	19817	54460.9	22493.7	9074.94	8431.91	9198.42	14687.8	40760.1	16693.5	35810	20583.1	68159.8	22939.9
M_1597	FOSAMINE	C3 H8 N O4 P	153.019	1.159	137036	57537.9	100619	7861.79	19817	54460.9	22493.7	11671.5	11404.5	13055.6	14687.8	40760.1	16693.5	35810	20583.1	68159.8	22939.9
M_1598	1-arachidonoyl-sn-glycero-3-phosphoethanolamine	C25 H44 N O7 P	501.284	9.568	17019.7	47176.5	86970.2	8410.91	24478.7	17395.1	37538.3	18757	17381.8	26524.7	18389.1	25876.2	136884	3946.34	18198.5	16048.2	51573
M_1599	DL-Histidine	C6 H9 N3 O2	155.07	1.258	63646.9	29277.3	52249.1	136323	68141.2	51811	69211.4	60707.6	51855.4	55668.1	58360.5	89484.1	61056.1	75304.2	56269	53130.7	72654
M_1600	4-{[5-({4-[(5-Aminopentyl)(hydroxy)amino]-4-oxobutanoyl}amino)pentyl](hydroxy)amino}-4-oxobutanoic acid	C18 H34 N4 O7	418.243	2.296	136136	3664.44	65050.9	82409.3	2209.01	2463.15	2515.89	2554.73	2348.24	2236.95	2435.56	2412.76	2251.49	3866.7	2692.89	3095.53	2889.23
M_1601	7-Deazaguanine	C6 H6 N4 O	150.054	1.56	13274.6	13337.8	16837.1	6720.85	11995.5	4270.28	3677.38	14395.4	17111	15656.9	10531.1	136118	15232.1	22053.2	14190	20858.3	19725.5
M_1602	Timonacic	C4 H7 N O2 S	133.02	6.043	105631	79876.3	135642	103616	6185.71	24739.1	3601.83	2468.66	2534.63	7457.81	42104.8	8005	20124.2	7772.06	2558.23	68580.5	15703.7
M_1603	Norepinephrine sulfate	C8 H11 N O6 S	249.031	5.921	85925.6	79508.8	87921.9	57520.8	43290.1	62553.7	120959	16698.7	27921.8	57214.4	60050.2	66727.8	135425	125269	25108.1	113590	124022
M_1604	Piperonylonitrile	C8 H5 N O2	147.032	5.657	13269	32780	69688.7	36940	21487.3	18920.6	43392.4	43203.8	29885.8	135416	23088.2	35992.9	13662.7	34916.7	42762.2	22355.7	91028.5
M_1605	5-Amino-5-oxo-2-[(2,3,4,5,6-pentahydroxyhexyl)amino]pentanoic acid	C11 H22 N2 O8	310.137	8.635	47006.8	55870.5	35494.1	9617.45	18917.2	27250.4	47808.6	33827	45666.2	46663.2	24173.4	22776.1	18769.3	23509.6	23896	19328.6	25770.3
M_1606	1,10-Dimethyl-4,7,13-trioxa-1,10-diazacyclopentadecane	C12 H26 N2 O3	246.194	1.194	43433.7	57866.8	49026	19468.6	44008.7	71718.7	91965.2	36457.9	18695.2	79053.1	9333.6	72727.7	28247.3	87068.1	135038	55003.3	120709
M_1607	1H-Imidazole-4-carboxamide, 5- (3-butyl-3-methyl-1-triazenyl)-	C9 H16 N6 O	224.139	8.795	39434.5	25173	12188.6	30441.7	18740.7	59283.7	13422.9	25171.7	21600.8	24201.3	38035.3	29506.5	25061.2	44937.2	97802.2	82592.2	93773.8
M_1608	Bis(4-chlorophenyl) hydrogen phosphate	C12 H9 Cl2 O4 P	317.962	1.338	6792.89	6891.51	8327.46	7190.61	6317.82	71513.9	7853.78	6544.85	6104.41	6589.72	6541.96	6876.76	6648.03	13978.6	24356.9	30757.4	134516
M_1609	TX-1041	C4 H6 N6 O	154.061	4.03	56566.8	60579	23971.6	77631.4	32251.4	35111.9	36410.3	23367.3	27585.9	55286.9	133940	34044.9	62842.8	92935.7	62993.2	48568.6	73939.7
M_1610	4-(2,3-dihydroindol-1-yl)-N-[3-(N-ethyl-3-methylanilino)propyl]-3-(1-imidazolyl)-4-oxobutanamide	C27 H33 N5 O2	459.263	8.537	89952.7	133867	97552.3	55257.6	43167.5	72803.3	37865.6	35678.4	75740.6	66410.3	60105.3	59169.7	17147.5	17528.7	20521.2	17351.7	17364.9
M_1611	tranexamic acid	C8 H15 N O2	157.11	1.151	10791.3	9474.69	11383.9	12554.3	11342.5	11620.7	11363.8	12661.4	10385.1	4908.57	11104.6	11468.9	9355.61	133704	35008.6	24598	57898.1
M_1612	4-(1,1-Dioxido-2,3-dihydro-3-thiophenyl)morpholine	C8 H13 N O3 S	203.062	3.788	30856.1	34656.4	38380.4	28501.5	55926.3	35846.2	30641.8	48857	46244.7	25025.7	29112.9	21092	61889.8	133703	14401.6	4709.98	46452.8
M_1613	1,1-Bis(cyclohexyloxy)-N,N-dimethylmethanamine	C15 H29 N O2	255.22	8.615	61005.8	62755.6	77315.8	47535.6	50615.3	126725	55164.9	51567.5	51840.4	67338.9	74872	55779.6	52503.7	59310	60875.9	64079.7	44374.5
M_1614	Diethyl (E)-azodicarboxylate	C6 H10 N2 O4	174.064	1.116	11643.8	10681.1	12887.5	13768.1	12079.8	12809.8	12185.5	12509.2	11026.8	10969.1	12730.1	12503.9	10715	132987	8997.4	12043.3	8879.86
M_1615	N-Methylmorpholine	C5 H11 N O	101.085	0.599	132921	1598.63	2227.65	7526.65	6842.01	2476.27	11353.5	608.973	5809.85	29817.3	17436.6	28847.5	10535.3	18619.2	18208.2	14435.7	21025.4
M_1616	(±)-Equol	C15 H14 O3	242.094	7.697	4513.83	3669.64	3180.72	4059.92	2983.76	3219.91	3251.39	2693.79	2840.12	3567.17	2716.98	3230.07	2041.06	84163.9	86338.3	132649	84865.7
M_1617	Glycylglycyl-L-valine	C9 H17 N3 O4	231.122	2.42	3234.84	3245.37	4131.5	2927.89	3353.57	4753.55	5315.78	3048.38	2606.58	3024.19	2469.7	3492.81	2652.65	132606	6039.95	5714.94	19527.4
M_1618	4-[3-(Diphenylmethylene)cyclopentyl]-2-butanone	C22 H24 O	304.182	7.762	10849.8	10194.6	10881.9	10946	63011.5	64054.3	78970.1	132246	113180	97662.6	103405	107944	94339.8	9127.28	7684.6	7251.48	6456.77
M_1619	amino-(3,4-dihydroxyphenyl)methylphosphonic acid	C7 H10 N O5 P	219.03	1.235	102877	50306.5	132081	81334.1	7279.08	47716.6	9680.8	20738.3	7980.92	5638.84	5677.84	5725.21	3052.62	65274.3	7454.6	9254.86	24012.7
M_1620	octylphenol	C14 H22 O	206.167	9.185	25471.4	34776.1	4341.67	131751	19416.3	17067.3	26770	13750.6	17592.4	29388.1	10862.4	24222.4	12050.9	20536.5	25764.3	18744.8	20098.8
M_1621	US1836000	C6 H8 N2 O	124.064	1.145	19334.4	11284.5	60344.1	14286.6	97700.1	95943.6	65118.6	12885.1	11927.3	11359.1	27180.4	131350	10526.8	10944.3	10505.4	12905.7	9762.29
M_1622	Propane-1,2,3-triyl tris((3-isocyanatomethylphenyl)carbamate)	C30 H26 N6 O9	614.178	7.857	27944.9	65379.6	38918.7	3134.82	61377.6	17457.3	83389.2	60321.1	131198	106694	94132.4	99993.9	43556.2	2079.62	2075.27	1862.57	2196.51
M_1623	5,6-Diphenyl-1,2,4-triazine-3(2H)-thione	C15 H11 N3 S	265.067	1.101	49737.6	56221.9	83872.5	56266.9	116289	73576.3	107687	95678.3	51588.2	96445.9	118274	124158	101332	53864.4	50099.9	131144	66668.3
M_1624	Ribose 5-phosphate	C5 H11 O8 P	230.019	1.421	13054	9980.25	20779.5	13352.8	17354.4	21271.5	40482.3	131142	80629.9	44714.8	62988	41014	35152.7	12013.9	20575.5	3905.84	3903.55
M_1625	1-[(4-Nitrobenzyl)sulfonyl]pyrrolidine	C11 H14 N2 O4 S	270.067	1.93	29537.3	15968.5	31921.8	4615.97	80192.3	122119	70338.7	75202.5	42267.6	47279	86945.1	47157.2	40464.1	70278.9	32968	49615.2	131123
M_1626	DA9380000	C6 H7 N O2 S	157.02	3.369	10135.4	22198.5	96384.8	5474.38	58338	48069.8	28908.1	33445.7	2891.43	2933.75	22137.3	67861	6239.64	62613.7	64144.3	130804	19415.8
M_1627	2-Hydroxyquinoline	C9 H7 N O	145.053	4.741	56422.3	77785.9	105238	130494	76435.9	96957.9	43366.8	58829.8	43028.8	93008.1	32308.8	56160.9	90824.3	36379.4	16331.3	63989.6	17326.9
M_1628	CHEIROLIN	C5 H9 N O2 S2	179.007	1.647	41806.2	74662.9	94594.4	130240	5365.92	20708.3	6246.12	5319.3	3931.26	2565.67	47748.2	7473.65	16722.6	10288.9	5994.24	16859.7	5465.84
M_1629	DL-Tryptophan	C11 H12 N2 O2	204.09	1.993	22866.5	15552.3	12362.7	129417	9264.94	2997.04	6758.39	11901.4	29018.8	18235.9	15443.7	15189.2	8670.88	3602.15	2106.88	2226.51	2345.28
M_1630	(2,5-Dimethyl-1,4-phenylene)bis(methylene) bis(N-carbamimidoylcarbamimidothioate)	C14 H22 N8 S2	366.143	2.177	10982	26761.8	12296.4	15645.1	7371.26	1146.3	12899.9	8239.34	8473.9	13691.1	13014.9	8106.17	10506.2	75370.3	24994.7	129373	34044.8
M_1631	Prolinamide	C5 H10 N2 O	132.09	1.111	41249.1	62097.5	53311.2	7958.86	29762.3	41532.9	33396.5	15876.3	29692.2	31075.6	34047.4	28759.8	28182.6	129337	23273.5	49260.9	57046.7
M_1632	2-trimethylammonioethyl methylphosphonofluoridate	C6 H16 F N O2 P	184.091	1.309	3788.37	6160.53	8630.36	14007.6	52336.5	61581.9	120749	71892.9	63073	108526	10471.5	66900.6	54599.6	17267.2	52718.6	7076.8	12312.9
M_1633	4,4'-Methylenebis[2-tert-butyl-6-(.alpha.-methylbenzyl)phenol]	C37 H44 O2	520.336	10.379	36441.5	8044.71	106554	6336.97	115134	112092	95127.2	119417	100228	121073	76951.2	111513	84251.2	91039.6	96973.8	56036.3	109887
M_1634	4-Nonanoylmorpholine	C13 H25 N O2	227.189	10.39	52104.3	36047.4	52671.2	19133.8	38695.5	41414.7	30297	16317.2	1548	20437.3	20583.8	104974	29147.7	27253.5	41455.8	33734.4	31937.2
M_1635	1-(4Z,7Z,10Z,13Z,16Z,19Z-docosahexaenoyl)-sn-glycero-3-phosphocholine	C30 H50 N O7 P	567.333	10.584	19766.8	6969.53	16890.9	6001.34	24927.4	20570.9	15151	24510.3	5886.52	25087.1	17063.6	12397.1	13170.3	5765.68	5295.36	5075.56	20025.5
M_1636	Paracetamol	C8 H9 N O2	151.063	6.217	8488.12	9614.76	8263.05	7864.59	8867.46	954.19	7589.27	8912.47	8490.54	6484.25	7550.65	8233.77	9773.86	9972.98	8438.48	9259.83	8998.04
M_1637	2-Methyl-2-propanyl (2,4,6-triamino-5-pyrimidinyl)carbamate	C9 H16 N6 O2	240.134	7.419	21904.2	43448.5	59549.5	33242.4	128260	55412.6	77947.7	16602.9	80707.8	70288.9	19155.5	8446.93	7086.94	4133.34	4734.17	12048.8	10444.3
M_1638	9-Butyl-6-thioguanine	C9 H15 N5 S	225.106	7.973	50566.4	49792.4	26398.7	128246	1413.5	12467.6	7993.77	6972.23	14756	16029.7	45249.4	10077.9	14320.7	6773.39	10332.6	10050.2	10638.2
M_1639	Jasmonic acid	C12 H18 O3	210.123	8.439	21154.8	31076.4	3951.99	5801.79	3587.69	9565.84	29783.5	19859.8	16435.1	128100	12915.4	5114.55	36639.3	2953.29	2509.96	2621.62	11088.8
M_1640	Glycerate	C3 H5 O4	105.019	1.301	7168.48	25893.7	17708.7	16223.3	58317.8	75872.1	61502.1	81227.5	99746	95665.6	114785	127977	86990.3	31263.2	74749.1	12679.6	72905.8
M_1641	4,6-Bis(ethylamino)-1,3,5-triazine-2-carboxamide	C8 H14 N6 O	210.124	8.082	28743.6	33361.9	22122.8	127904	3678.44	24674.5	15745.6	22772.7	23209.5	1374.72	24559.8	7370.33	925.116	991.907	802.675	806.514	813.097
M_1642	1-Tetradecylamine	C14 H31 N	213.246	7.694	52823.7	35922.7	41074.4	36880.8	39791.8	95584.4	103154	46345.9	34022	34949.2	76723.1	123075	91309.4	17315.4	127779	13658.5	25869.4
M_1643	Valpromide	C8 H17 N O	143.131	8.158	44367.5	41476.2	36127.9	44577	72374.4	75269.2	127765	46035.1	42951.1	49668.2	41711.9	37502.1	31569.5	27422.4	30290.7	26160.7	24287.5
M_1644	1-(Phenylthioxomethyl)piperidine	C12 H15 N S	205.093	2.949	46201.4	127628	50078.7	67956.7	31146.4	11614.4	35291	88332.6	122726	77083.1	70478.3	75728.4	67198.4	4393.2	2431.8	2399.05	2482.55
M_1645	D-Erythrose 4-phosphate	C4 H9 O7 P	200.009	1.219	127474	28703.7	65887.9	72791.8	8751.16	5297.46	13069.9	19728.3	42786.8	17515.8	12682.8	7740.74	5544.76	6995	4507.77	4600.88	4250.92
M_1646	L-Methionine sulfoxide	C5 H11 N O3 S	165.046	1.442	35335.5	58737.2	100771	127466	35952.8	45989.6	21027.9	18314.7	9607.26	22250.6	32915.1	16217.5	17234.8	39483.4	24983.2	40322.5	14241.1
M_1647	Bis[(2-isopropyl-5-methylcyclohexyl)oxy](2-methoxyphenyl)phenylsilane	C33 H50 O3 Si	522.353	10.084	104794	57797.4	60879.5	126936	93331.5	64794.3	82733.9	54481	57307.8	107404	35634.7	81776.9	79145.4	13196.2	20127.7	37948.4	75227.3
M_1648	Nitrosobis(2-oxopropyl)amine	C6 H10 N2 O3	158.069	1.31	35803.5	58244.6	69599.4	76293.3	54773.8	50456.8	39233.9	39638.5	56293.5	35009.7	47251.2	48499.7	78286.9	91163.4	72985.1	22542.4	83144.8
M_1649	Precocene II	C13 H16 O3	220.11	8.609	126332	68502.1	116607	105640	45139	31621.6	61279.1	18370.5	25568.1	17764.2	29669.2	30524.3	14062.7	9117.49	11105	9470.09	12775
M_1650	tranexamic acid	C8 H15 N O2	157.11	1.414	68723.7	46868.8	83682	39722.4	42492.2	57958.3	27190.5	22561.7	28553.1	42733.2	25932.3	81319.9	18557.6	78510	46310.7	39139.2	109960
M_1651	2-Phenylimidazo[2,1-b][1,3]benzothiazole	C15 H10 N2 S	250.056	2.067	39053.4	47310.1	72743.6	50697.5	45097.1	77800.9	41848.3	42420.4	66631.3	77966.1	66008.3	50046.4	70574.4	11904.3	62474.7	126095	56703.3
M_1652	2,2'-Bipyridine	C10 H8 N2	156.069	7.67	7082.66	6775.76	6981.46	7096.13	7018.96	7001.59	6451.35	5884.36	6101.75	6853.63	6170.74	6566.42	4746.42	5880.14	5559.79	4010.51	4122.22
M_1653	Lys-Trp	C17 H24 N4 O3	332.186	8.777	8756.38	36418.2	27141.9	3127.53	90720.7	112899	70050.7	85974.7	65602.3	73278.6	77896.9	125878	58265.6	52490.1	70416.1	62226.1	52466.4
M_1654	trans-3-Indoleacrylic acid	C11 H9 N O2	187.063	7.306	19186.6	16270.5	32947.5	17069.5	16320.2	23655.1	19863.8	11657.6	15610	13590.2	11412.2	8795.99	4981.61	125598	37669.8	52764.3	39008.4
M_1655	1-Benzosuberone	C11 H12 O	160.089	8.143	15719.2	33073.6	29437.8	12952.9	16771.2	26248	46229.8	39638.1	23819.7	59770.7	28761.6	47791.3	20709.6	110462	57629.2	58549	79712.8
M_1656	4-Hydrazino-6-methoxy-N,N-dipropyl-1,3,5-triazin-2-amine	C10 H20 N6 O	240.171	8.79	59306.1	13713.8	2793.64	15716.2	116431	3825.03	11812.6	12834.7	5693.97	94397.4	8734.21	4070.73	6470.61	4651.52	8971.39	26977.7	8749.35
M_1657	5,5-dimethyl-2-(6-methyl-2-(methylsulfanyl)pyrimidin-4-yloxy)-1,3,2-dioxaphosphorinane-2-thione	C11 H17 N2 O3 P S2	320.042	2.868	4581.62	7151.19	5233.5	3632.09	20531.1	28950.1	9979.25	3361.05	3314.8	4017.3	3967.85	3530.86	3501.17	125369	4701.12	3554.44	3946.46
M_1658	4-Acetamido-1,2,3-cyclohexanetriyl triacetate	C14 H21 N O7	315.132	7.686	2730.26	2812.84	2666.15	2735.45	2501.06	2699	2553	2334.56	2352.13	5852.42	2444.4	2879.51	1769.52	114877	125298	100429	59740.7
M_1659	benzoquinone	C6 H4 O2	108.022	1.411	28019.8	61743.1	125156	12166.4	19977.5	23910.1	13877.8	20618.4	7067.33	7390.35	10967.8	17734.2	13378.5	10089	11699.5	18618.6	2714.28
M_1660	Ethyl 4-{[2-(benzoylamino)ethyl]amino}-1-piperidinecarboxylate	C17 H25 N3 O3	319.189	8.042	13849.4	8939.46	2607.58	12455.6	8720.52	10334.3	12629.4	12932.8	12969.8	19406.8	12288.8	124948	1907.64	5650.53	1737.34	1938.05	4747.07
M_1661	6-Amino-9-methyl-7H-purin-9-ium	C6 H8 N5	150.077	1.028	49414.7	39822	52057.3	42031	12078.5	34144.1	11369.2	12156.2	11571.2	12516.4	12111.3	27962.2	11512.4	124893	19821.1	28282.9	12118.7
M_1662	noradrenaline	C8 H11 N O3	169.074	3.726	38840.8	16303	40122.4	124656	15722.5	15385.3	8927.97	11777.8	14156.7	9190.8	8920.02	10177.1	17025.6	11409.3	11567.9	16292.3	9035.02
M_1663	Gly-Lys	C8 H17 N3 O3	203.126	1.482	1155.61	1156.02	1300.09	1089.58	13704.8	6553.97	6641.52	11099.5	2300.45	2658.31	5855.77	2025.34	4211.39	124645	22266.9	28267.1	18840.6
M_1664	P,P-Bis(1-aziridinyl)-N,N-dimethylphosphinic amide	C6 H14 N3 O P	175.087	1.502	13487.9	11882.2	16045.3	11972.7	13596.2	15811.9	14393.4	11752.9	9376.96	12497	12747.5	11470.5	12592.1	25697.2	14787.3	30964.8	72948.3
M_1665	1-Methyl-4-(2-methyl-2H-tetrazol-5-yl)-1H-pyrazol-5-amine	C6 H9 N7	179.092	5.226	29605.4	24985.4	40949.4	11560.9	46607.1	123162	33957.3	40074.5	49383.3	88725.2	69318.1	16800.8	42985.7	18068.7	12266.2	19371	12506.8
M_1666	Phenol	C6 H6 O	94.0424	0.681	46879.6	77199.1	69460.5	27247.8	32904.6	22047	22278.1	40834.6	43702	31260.6	9542.95	26800.5	92169.8	29918.8	28390.1	38530.4	54328.5
M_1667	4-Nitroaniline	C6 H6 N2 O2	138.043	1.482	33508.5	36919.6	29181.1	25953.7	46376.7	71813.1	49751.2	71363.6	18670.1	68169.7	14126.3	33767.6	39940.6	38861.1	37927.9	45270.6	27518.3
M_1668	1,4-Butanesultone	C4 H8 O3 S	136.019	0.596	815.251	12572.5	93.1512	2120.36	2265.84	672.382	92905.9	8070.17	400.953	5055.86	4872.11	5718.09	6644.42	3582.6	122792	4795.1	3101.9
M_1669	Procaine	C13 H20 N2 O2	236.152	8.343	5678.58	6125.87	5873.16	122791	5600.28	5829.26	6046.97	5587.64	5932.81	5838.29	5725.71	6305.81	4271.29	5628.21	4416.5	4719.29	4404.62
M_1670	235BBF3K97	C20 H28	268.219	9.943	15787.1	42280	26239.4	5229.69	67035.7	86317.5	99686.8	70096	21540.7	56803.7	81315.7	73705.6	66948	48125.7	67091.7	44711.2	122753
M_1671	Pyridoxal	C8 H9 N O3	167.059	2.359	15455.9	6960.31	3865.17	2254.2	15872.3	8660.39	26305.6	41993.2	22401.6	25271.5	10581.5	4526.56	5837.25	122144	28257	17887.5	26590.2
M_1672	trimethadione	C6 H9 N O3	143.058	1.123	72160.8	61987.6	51627.1	60769.8	44601.8	47410.5	69618.6	64649	56506.9	43269.9	39858.7	51044.8	57770.4	121737	99682.2	21861.2	51070.9
M_1673	Loratadine impurity H	C8 H13 N O3	171.09	5.441	44680.5	18252.7	31531	115882	7648.92	6601.36	5990.63	10494.2	12544	9043.68	6363.69	3675.11	11268.6	121435	9951.91	8093.87	7399.13
M_1674	MFCD00056730	C11 H19 N3 O6 S	321.099	1.235	12024.5	11834	13801.7	12669.4	11955.1	13829.6	13606	43262.7	121144	18537.1	18362.9	12876.8	14083.6	18864.3	15079.2	15592.1	14164
M_1675	8-Azaguanine	C4 H4 N6 O	152.045	0.916	62503.8	58827.9	68182.1	69210.7	72323.4	62834.3	51716.6	58371.8	33135.1	56620.7	62383	67784.9	54248.7	48633.5	49224.1	55421.4	43634.2
M_1676	6-Amino-1-ethyl-3-propyl-2,4(1H,3H)-pyrimidinedione	C9 H15 N3 O2	197.117	1.42	120849	4588.78	5636.94	14659.4	9378.18	82007.7	30528.3	26860.6	16673	16824.5	9316.33	6895.22	26569.6	3000.93	1805.73	1601.93	3277.55
M_1677	Tetrahydrodibenzothiophene	C12 H12 S	188.066	1.211	120562	46556.2	31773.1	37284.7	41715.8	32658.4	43664.3	44575.8	37912.4	54401.6	41448.6	13961.2	54581.4	111175	113867	47646.9	32744.1
M_1678	Arsenic acid	H3 As O4	141.925	1.932	1794.49	1847.5	1811.82	1769.24	1539.97	1819.56	1824.04	1623.45	1608.77	1645.62	1760.66	1720.7	1714.17	3058.68	1945.82	1906.36	2142.34
M_1679	thiodiglycol	C4 H10 O2 S	122.04	0.802	4232.46	4158.01	98839.6	7623.16	2090.99	3236.4	1526.85	7447.67	8428.91	8588.85	1708.32	8041.87	1979.58	14138.8	120428	7161.55	1363.32
M_1680	DO0750000	C15 H24 O2	236.177	8.825	7063.66	7141.62	6307.77	32457.5	120403	26797.6	24977	22124.7	21157.1	25213.8	22766.6	21163.4	8082.07	34896.8	9038.34	29784.5	24830
M_1681	1,3-Dicyclohexylurea	C13 H24 N2 O	224.189	8.251	35331.2	38522	88425.8	48777.2	26477.7	120164	51252.7	29347.8	14600.3	10186.1	76836.1	13488.9	55675.5	29822.8	68110.1	26272.2	34205.6
M_1682	4,6-Di(1-piperidinyl)-1,3,5-triazine-2-carbonitrile	C14 H20 N6	272.175	9.104	85104	6209.29	73735.6	119753	61811.9	63431.8	75652.1	54776.5	46207.8	43096.4	50989.8	98781.8	42478.6	7066.88	47079.2	60145.1	9334.05
M_1683	3-Phthalimidopropionic acid	C11 H9 N O4	219.053	5.033	5702.79	6153.09	6156.39	5512.65	7232.88	5756.75	7201.55	6637.02	5830.35	7219.62	6334.48	8173.64	6876.59	37938.5	5662.9	8424.57	10345.7
M_1684	L-(+)-Leucine	C6 H13 N O2	131.095	0.721	39128.4	67604.7	92208.6	74715.7	51661.4	59911.6	56779.6	70743.5	61100.5	60793.1	98449.9	52586.6	103848	88614.6	5178.22	65084.8	41099.9
M_1685	AM9627000	C8 H7 N O3	165.043	4.917	89830.1	68538.1	100731	119354	6018.56	7141.72	5678.76	13266	8708.53	4276.17	12881.3	8418.31	12850.4	4325.18	4186.03	4345.18	4280.59
M_1686	ANDROSTENONE	C19 H28 O	272.214	10.092	77184.7	119229	23069	24438	4469.03	923.911	7414.78	4420.14	34798.3	67040.6	10755	4128.38	7980.43	31253.1	5805.95	3798.08	5471.48
M_1687	(2R)-3-{[(2-Aminoethoxy)(hydroxy)phosphoryl]oxy}-2-(hexanoyloxy)propyl hexanoate	C17 H34 N O8 P	411.202	7.035	16759.4	46346.7	30063.6	23946.5	116912	27902.8	50491	62614.6	86240.6	89931.9	89053.1	118828	42209.4	9784.14	25281.2	30980.6	63301.3
M_1688	HM1650000	C12 H26 N2 O4	262.189	1.568	12619.3	3669.77	50945	22865.7	27302.8	96194.8	31472.9	8512.29	4917.61	21357.5	4406.32	43255.3	12019	118791	40852.2	47315	6528.57
M_1689	Diethyl 4-dodecyl-2,6-dimethyl-1,4-dihydro-3,5-pyridinedicarboxylate	C25 H43 N O4	421.319	8.166	86330	100332	78735	67753.2	45845.4	24667.9	74268.2	45887.9	68580.8	51263.2	78988.3	44185.7	56564.5	118776	32766.6	30113.8	59859.7
M_1690	4-Hydrazino-6-methoxy-N,N-dipropyl-1,3,5-triazin-2-amine	C10 H20 N6 O	240.171	8.695	26111.7	112397	21128.4	17394.6	34735	113104	11189.7	115048	108489	31690.6	108593	27178.3	8225.79	7448.47	92776.3	10633.7	118401
M_1691	Butylphthalide	C12 H14 O2	190.1	8.139	10272.8	12346.9	10938.4	4601.48	8325.15	4565.3	8453.71	1284.94	5891.45	9955.83	4865.11	10160.5	7806.94	118387	10875.2	7724.44	1891.92
M_1692	4-[(2-Methyl-4,6-dinitro-1H-benzimidazol-5-yl)amino]phenol	C14 H11 N5 O5	329.074	4.7	2427.65	3035.57	5382.25	2309.97	4831.08	12657.7	2324.59	2210.95	2317.86	714.875	2313.03	2262.31	2297.87	118331	9123.17	21834.9	13707.6
M_1693	C8-HSL	C12 H21 N O3	227.152	8.373	44786.3	61641.1	61187.6	118310	26645.9	17327	24172.1	24506.8	12654.3	46902.8	66489.4	23934.1	32005.1	12760.5	12027.6	7686.78	27330.3
M_1694	2,2'-(Dodecanoylimino)diacetic acid	C16 H29 N O5	315.205	4.653	74359.1	57147.1	79963.1	118286	45372.9	21554.3	33280.9	53713.8	71052.7	62278.6	48432.6	52848.2	80193.5	68444.8	23073.8	29546.2	46553.2
M_1695	2-Ethylhexyl maleate	C20 H36 O4	340.262	8.966	23380.2	31572.6	27625.9	17190.8	6947.44	12082.5	118213	6522.09	9513.94	9713.44	10626.1	19642.9	12201.9	107157	15130.9	15160.3	14969.9
M_1696	Benzoxazole	C7 H5 N O	119.037	4.629	16806	15080.3	16008.3	16427.7	6277.29	14091.1	17399.8	3869.85	5467.24	10281.1	10455.8	12392.3	13797	118186	21071.1	41221.4	45582.8
M_1697	1-[N-Cyano-N-(4,6-dimethyl-2-pyrimidinyl)glycyl]-4-piperidinecarboxamide	C15 H20 N6 O2	316.165	8.03	3642.27	4562.73	3654.48	3782.38	4495.22	3484.88	3556.56	4510.99	3387.87	12952.8	3575.68	118097	2315.12	9395.15	2925.24	3493.38	2736.55
M_1698	glu-thr	C9 H16 N2 O6	248.101	1.216	117847	48028.3	118047	79192.6	29016.1	59889.1	46547.2	40403.1	32583.5	25360.2	49282	40083.3	31564.8	25944.1	25412.9	69751	35883.4
M_1699	[5-(3,5-Dinitrophenyl)-1,3,4-oxadiazol-2-yl]methyl acetate	C11 H8 N4 O7	308.039	1.181	14211.9	55664.9	34985.7	31728.4	61214.4	67626.8	68386.5	44998.8	48505.2	81730.6	48025.6	68837.6	62310.9	117334	59854.3	56615.9	63022.3
M_1700	2-Amino-3-hydroxypropyl dihydrogen phosphate	C3 H10 N O5 P	171.03	4.481	37119.9	4819.85	5971.39	117147	5587.58	13222.3	8425.96	11422	4080.92	13410.9	7226.64	12656.8	13754.5	12200.7	14233.1	13286.4	13750.6
M_1701	(2E)-2-[(1E)-1-{[(Z)-Amino(hydrazono)methyl]hydrazono}-2-propanylidene]hydrazinecarbohydrazonamide	C5 H14 N10	214.141	10.596	116762	3148.81	754.921	96070.9	1426.26	1169.56	1654.77	4531.29	650.45	1516.96	4615.35	511.347	577.213	444.748	857.143	3118.57	1458.61
M_1702	methylthiomethyllithium	C2 H5 Li S	68.027	2.884	32625.5	12870.2	44683.3	6586.05	5047.73	5045.1	35585.5	25442.5	4785.29	36579.6	4810.25	31270.4	34370	116599	5044.11	27698.4	28236.8
M_1703	Octyl 5-oxo-L-prolinate	C13 H23 N O3	241.168	8.677	8755.32	2763.99	6166.45	5896.94	20258.8	7515.04	10485.6	7667.6	13202.2	11733.9	5537.29	7697.77	2910.44	116353	8310.74	7498.99	37841.2
M_1704	TAA	C9 H15 N	137.121	1.489	3934.1	6095.91	5794.89	4846.73	4359.3	6206.86	5668.51	3531.41	3076.5	5714.29	3665.22	4860.25	5717.16	8474.85	5789.38	5221.75	6041.64
M_1705	2'-Deoxyadenosine	C10 H13 N5 O3	251.102	1.607	7484.32	18519.5	20767.8	12404.6	23166	50419.6	72018.3	67699.6	32305.3	42211.3	115995	75825.5	30909.5	15835.6	8798.89	5157.65	5770.45
M_1706	TRANS-3'-METHOXY-4-(METHYLTHIO)CHALCONE	C17 H16 O2 S	284.087	8.617	36599.9	16063.3	23520.2	115956	16911.1	16379	15798.3	25991	59008.8	37170.6	23419.1	29229.5	17820.7	10245.2	12297.7	18573	12126.8
M_1707	Leu-ala	C9 H18 N2 O3	202.132	1.877	115936	49974.5	52996.7	78008.8	2291.26	2764.34	2819.07	2577.6	2325.45	2489.42	2673.98	2688.31	2898.42	5008.89	2975.75	2874.2	3189.62
M_1708	Loratadine impurity H	C8 H13 N O3	171.089	5.546	41303.9	656.627	1222.25	115882	1418.08	731.156	914.89	670.467	956.361	302.281	757.27	1359.21	8485.26	1522.39	354.869	1244.06	383.28
M_1709	3,11,17,21-Tetrahydroxypregnan-20-one	C21 H34 O5	366.241	8.259	17650.6	15442	10462.2	5340.33	20047.5	15965.6	32736	30704.9	30743.4	21837	17145.2	23899.6	20464.4	51043	75867.9	18502	33002.7
M_1710	OZ4150000	C10 H19 N O2	185.142	7.278	27919.2	13468.1	40544.2	8567.13	40623.3	47709.1	23016.7	75681	22907	19131.2	48897.2	23124	9194.59	2239.99	7765.44	32974.2	14728
M_1711	5,5,5',5'-Tetraallyl-1,1'-dicyclohexyl-3,3'-bipiperidine-2,2',4,4',6,6'-hexone	C34 H44 N2 O6	576.317	10.477	55199.7	50954.9	66800.4	114894	46739.5	43370.4	32988	49944.8	59052.3	35004.1	36969.7	37405.7	35814.4	42427.5	37988.8	1596.65	13624.6
M_1712	1H-1,2,4-triazole-3-sulfonic acid	C2 H3 N3 O3 S	148.99	0.597	43054.1	15832.6	32978.7	39519.4	2276.59	3689.02	2655.2	289.999	2032.98	7056.85	17072.7	89687	5660.07	60435.2	49270.7	52554.8	58497.5
M_1713	benzyne	C6 H4	76.0315	2.442	41539.9	32618.8	2113.45	32984.7	43478.3	78176.7	59592.9	44788.7	22345.3	45680.7	32402.4	67602.6	46121.3	73625.1	57257.1	114684	64796.9
M_1714	2,4,6-Triisopropylbenzophenone	C22 H28 O	308.214	9.382	20908.5	13761.2	4007.09	27454.9	4548.64	9481.27	13435.6	19824.3	45095.7	24286.1	11766.6	10716.7	9749.53	46939.1	114359	46966.7	91511.4
M_1715	2,2'-{[1-(4-Piperidinyl)-1,3-propanediyl]di-4,1-piperidinediyl}diethanol	C22 H43 N3 O2	381.336	7.179	8144.53	2519.22	2426.25	23235.1	114068	47267.1	28154.6	19697.2	2990.3	25520.9	2415.61	89964.3	54398.5	1849.71	2039.61	21239.5	2246.44
M_1716	3-(2-Thioxo-2,3-dihydro-1H-imidazol-4-yl)-2-(trimethylammonio)propanoate	C9 H15 N3 O2 S	229.088	1.422	107523	44105.2	114030	2361.5	8304.55	61604.4	19311.7	37659.5	23789.6	10699.8	17204.5	9123.01	19474.5	3562.54	2143.66	1901.73	2476.4
M_1717	7,13-Dimethyl-1,4,10-trioxa-7,13-diazacyclopentadecane-2,6,14-trione	C12 H20 N2 O6	288.132	6.285	5719.66	4930.57	5517.4	4944.02	9378.14	6277.27	12473.1	7937.45	5531.49	3507.93	5779.12	4817.64	4842.64	113863	26962.8	60890.5	22557.9
M_1718	3748	C13 H24 O3	228.173	8.196	13456.5	20880.2	13510.6	39819.6	13968.5	17190.6	113818	9109.49	22856.8	3748.36	9816.29	12704.9	20016.7	5209.79	20614.2	9911.79	10993.7
M_1719	Pivaloylacetonitrile	C7 H11 N O	125.084	1.111	30017.2	28106.8	34143.8	35323.7	31790.8	33325.4	30694.8	32144.6	29628.3	28011.2	32781.6	32000	27085.4	113775	24329.1	30874.5	17325.6
M_1720	1,5,9-Trimethyl-10-[(2-methyl-2-propanyl)peroxy]-11,14,15,16-tetraoxatetracyclo[10.3.1.0~4,13~.0~8,13~]hexadecane	C19 H32 O6	356.22	10.531	42264.9	87759	23900.5	17927.9	61994.2	50515.1	55298	69344.5	8171.85	113699	48544.4	36062.2	44482.4	3143.6	64699.2	9925.21	39412.9
M_1721	1-Cyano-3-(2-{[(3-methoxy-2-pyridinyl)methyl]sulfanyl}ethyl)-2-methylguanidine	C12 H17 N5 O S	279.115	6.837	5261.57	1353.19	1725.63	2786.8	5711.01	2581.91	2305.58	3668.33	2885.57	4521.54	2657.96	1932.5	2378.66	113635	16638.3	20715.7	10066.5
M_1722	MFCD00083078	C22 H45 N O3	371.34	8.103	113609	11287.8	2563.11	3425.59	16116.7	2211.63	4446.17	8877.68	60480.8	6421.75	3633.58	5816.38	1713.92	4769.78	3500.6	2091.25	15475.3
M_1723	MFCD00041564	C11 H22 O3	202.158	8.798	50033.8	23495.2	20597.8	43874.9	13591	57957.7	8377.9	8259.78	26131	29604.4	25942.9	28094.9	18807.2	46471.8	27029.7	36779.4	113349
M_1724	Dimethyl 4-morpholinylphosphonate	C6 H14 N O4 P	195.066	1.236	113283	67480.8	46968.2	38326.7	7936.78	8858.01	4263.58	14909.4	42342.6	13977.9	9202.05	14867.2	20603	13654.3	31729.2	9887.01	23552.4
M_1725	N-Boc-3-Pyrrolidinone	C9 H15 N O3	185.105	7.128	26852.8	19058.3	15004	113085	16351	14194.5	2698.02	13876.5	2707.5	15160.5	14160.9	17653.3	10430.5	15293.2	13985.4	13868.6	13544.8
M_1726	N-(2-oxolanylmethyl)-2-[7-oxo-3-(phenylmethyl)-6-triazolo[4,5-d]pyrimidinyl]acetamide	C18 H20 N6 O3	368.16	8.423	7121.41	6815.43	7074.33	7058.24	6842.5	6963.99	6910.77	7099.66	7225.18	7322.58	7248.42	7117.48	6140.86	48746.6	18313.8	93153.4	54485.3
M_1727	4-(2,2-Dimethylhydrazino)-2,6-dimethyl-1,1,3,3-cyclohexanetetracarbonitrile	C14 H18 N6	270.159	8.899	83475.2	104817	85721	104458	79511.8	110862	63505.5	80127.3	96879.6	87033	67580	82226.5	64928.6	65474.3	59189.3	87939.9	91442.3
M_1728	MFCD01580212	C10 H13 N O2 S2	243.039	6.687	11003.5	2361.18	2389.02	2431.17	112191	57129	28129.9	20705.6	33746.5	7027.42	20580.3	38485.8	40480.9	2723.7	2333.98	2435.68	2442.15
M_1729	4-(4-nitrobenzoyl)morpholine	C11 H12 N2 O4	236.08	1.557	32605.5	54489.4	82194.2	8112.33	112175	88007.1	86354.9	52364.5	32857.3	57054.3	40885	33216.1	50798.6	17627.9	55246.3	84691.7	60230.7
M_1730	(2R)-2-[(7-Oxoheptanoyl)oxy]-3-(palmitoyloxy)propyl 2-(trimethylammonio)ethyl phosphate	C31 H60 N O9 P	621.401	10.674	7172.71	7815.07	10316.3	111980	7748.61	7227.53	6881.87	7255.78	8298.44	7259.94	7179.99	6740.64	6909.3	7371.69	6753.64	6954.5	7239.93
M_1731	2-(4-Thiomorpholinyl)ethanol	C6 H13 N O S	147.072	1.391	8846.98	4905.65	51810.9	15204.9	33401.8	46154.5	8613.44	36911	55610.8	33392.2	7704.9	6549.25	40394	25246.5	11836.9	15669.3	11960.3
M_1732	3-AB	C7 H8 N2 O	136.064	0.936	7865.65	4189.24	5294.14	5181.41	6071.77	4602.34	14067.9	28910.2	10702.2	6707.17	6066.42	5777.13	4630.36	111793	14932.9	10955.2	7098.74
M_1733	1,3-Dioxolane, 2-(2,4,6-trimethylcyclohex-3-enyl)-4-(1-piperidylmethyl)-	C18 H31 N O2	293.235	8.801	4029.07	749.888	3891.36	4055.53	110874	66547.6	106478	3890.29	5169.68	6755.83	18759.6	4051.31	3434.83	3641.4	5979.7	3844.16	4360.9
M_1734	Ethyl 7-[3-(3-cyclohexyl-3-hydroxypropyl)-2,5-dioxo-4-imidazolidinyl]heptanoate	C21 H36 N2 O5	396.262	7.719	2087.15	1991.07	1962.74	2140.04	1696.03	794.097	110780	1647.06	2678.87	6564.47	1699.21	1770.8	1731.91	1817.35	1681.97	1209.56	1337.6
M_1735	O-Cyclododecyl O-methyl carbonothioate	C14 H26 O2 S	258.165	7.727	24761.7	77247.3	18862.8	29704.8	41188.5	7232.81	23128.9	18943.1	43899.8	48140.9	29777.4	12234.5	21440.9	110706	20319.6	13582.1	46680.2
M_1736	2,2,5,5-Tetramethyl-3-pyrroline-3-carboxamide	C9 H16 N2 O	168.126	6.585	36563.1	16023.3	44340.8	34294.3	30242.4	31040	20297.6	50247	29458.5	14757.5	61795.2	35108.5	34581.5	26030.8	28705	65356.3	24176.7
M_1737	ANDROSTENONE	C19 H28 O	272.214	9.626	108515	110363	67932.4	33335.3	14440.3	19268.5	34748.1	10531.2	69763.8	91805	58713.6	23308.5	61807.5	60663.8	41914.8	12853.6	24747.9
M_1738	4'-tert-Butylacetophenone	C12 H16 O	176.12	8.148	18204.7	22812.7	13390.8	110351	19196.8	11815.2	20712.4	4732.16	17836.5	23985	60762.7	17780.1	13452.6	5199.22	15459.3	13806.1	41161.8
M_1739	1-(4-Nitrophenyl)piperidine	C11 H14 N2 O2	206.105	1.237	5875	16435.2	16311.8	4899.96	13979.5	58352	14800.9	4497.43	4145.12	7808.79	4360.94	7039.88	4974.54	110291	37955.6	24962.2	78587.7
M_1740	[4-[1-(1-cyclopentyl-5-tetrazolyl)propyl]-1-piperazinyl]-(2-furanyl)methanone	C18 H26 N6 O2	358.212	8.501	11335.7	15257.5	9500.08	9340.42	4261.47	4613.16	5512.44	15097	8343.95	15298.1	5288.18	4976.21	3731.42	34933	61079.2	25358.4	110219
M_1741	MFCD03100412	C16 H29 N O3	283.215	8.954	41639	67848.6	61900.6	59307.7	60023.5	102697	47313.2	62022.1	88995.3	47431.2	48831	77594.5	49083.5	59289.9	34803.6	92154.4	83387
M_1742	Dehydrothiotoluidine	C14 H12 N2 S	240.072	1.208	5123.77	4525.68	6712.89	4796.29	21034.2	47531.3	28887.6	6231.97	4715.54	7509.91	13820.8	23425.5	5388.37	6420.09	8190.23	110116	13014.8
M_1743	PA3500000	C23 H32 O2	340.24	9.382	19108.2	11825.9	2529.8	26123.5	3286.87	8241.21	12221.8	18486.4	43624.5	23014.1	10582	9464.55	8590.21	45702.4	110087	43777.3	86569.3
M_1744	D-Erythrose 4-phosphate	C4 H9 O7 P	200.009	1.133	14608.9	92367.4	10756.1	110020	2085.03	15072.5	10693	4753.63	1853.15	2740.07	3507.06	2085.26	1713.55	1235.8	1685.83	2099.53	1573.06
M_1745	4-Nitrophenyl (2E)-3-(2-thienyl)acrylate	C13 H9 N O4 S	275.024	7.817	36288	11890.4	46875.8	24825.3	14389.3	7258.75	11643.4	9387.09	3592.43	20350.3	10763.5	34543.2	11718	19056.7	71309.9	31022.4	98839.6
M_1746	Strophanthidin, 3-((dipropylamino)acetyl)-	C31 H47 N O7	545.336	10.287	37178.2	9715.33	8610.59	109678	3134.22	2119.64	15903.7	18895.7	8776.22	26915	9410.52	4527.82	15290.3	3044.79	10080.3	65452.6	8652.77
M_1747	Phenyl N,N'-dibutyl-N,N'-dimethylphosphorodiamidate	C16 H29 N2 O2 P	312.198	10.369	63252.3	109607	40685.5	39784.3	73837.8	74797.5	67514.6	91582.5	104886	19513.8	71389.2	21205.4	86253.3	72975.2	87455.6	38943	86390.3
M_1748	2,4-Diamino-6-pteridinecarboxylic acid	C7 H6 N6 O2	206.055	5.533	17573	19405.9	2782.77	20042.2	17831	20028	16950.4	21383.6	19120.2	18622.1	19741.5	20665.2	22154.1	109457	21961.2	43108.1	12466.5
M_1749	3,18-diethyl-2,7,13,17-tetramethyl-1,19-dioxo-1,2,3,4,5,15,16,17,18,19,22,24-dodecahydro-21H-biline-8,12-dipropanoic acid	C33 H46 N4 O6	594.341	10.723	10772.9	43977	29350.9	13586.5	109452	68995.6	64195.9	77522.6	71319.9	56620.2	53045.1	68127	55544.4	10041	33588.4	30945.8	20453.4
M_1750	3-hydroxylinoleoylcarnitine	C25 H45 N O5	439.33	8.136	20867.8	28413.3	19488.1	18690.5	19901	28451.2	29417	22153.1	14938.8	24884.4	20047.6	34207.4	12006.2	109391	7355.37	920.151	15404
M_1751	Ethyl 4-isothiocyanatobutanoate	C7 H11 N O2 S	173.051	3.551	21658.1	47652.6	24900.6	27203.4	86034.7	57893.6	37830.2	47220.5	81513.7	74690.9	75306.9	11235.5	59128.2	29100.3	9037.37	10211.7	109213
M_1752	9-Fluorononanal	C9 H17 F O	160.126	9.099	14222.2	25984.6	15218.2	6390.35	108913	90807.9	95492.4	21254.5	8532.62	15732	25786.1	16190.7	4992.74	8047.01	12526.7	13829.5	9011.06
M_1753	141551	C4 H4 N6	136.05	4.626	18593.5	15788.2	6472.73	15713.3	3099.29	15498.4	14822.6	6267.82	15556.1	11717.5	9483.04	15089.7	4706.38	8518.85	14790.4	9556.12	20393
M_1754	N-(Phosphonomethyl)-D-glutamine	C6 H13 N2 O6 P	240.051	1.843	102104	83655.6	84420.6	95488.1	41249.8	18320.4	47531.1	37997.1	52153.2	47017.4	31971.1	59972.9	108737	44206	37269.7	53017.4	55362
M_1755	5-[3-(4-Aminophenoxy)propyl]-2,4,6-pyrimidinetriamine	C13 H18 N6 O	274.154	8.424	4554.08	2831.26	1895.62	4780.11	2066.42	2472.54	1796.7	5988.44	2293.24	2599.19	1633.39	5088.84	2313.56	1971.85	5278.95	108638	4851.45
M_1756	Precocene II	C13 H16 O3	220.11	8.519	108583	84665.3	104464	8150.2	36981.7	27018.2	13502	12681.1	22562.7	12580.6	14413.9	8211.2	7625.92	2055.77	22688	11108.4	7576.75
M_1757	Tetrahydroisoquinoline-3-carboxylic acid	C10 H11 N O2	177.079	6.987	7119.62	2276.73	3713	6356.89	3032.98	12195.4	42423.7	5096.72	2160.6	14647	7639.03	6666.22	19589.6	31951.4	10086	108366	13646.3
M_1758	Loratadine impurity H	C8 H13 N O3	171.09	2.652	80153.3	52418	64073.8	62349.4	40219.4	67267.9	61128.3	44047.1	35149.5	77287.4	65341.5	39862	40382.5	107910	26150.4	13356.2	33949.1
M_1759	({4,6-Bis[(hydroxymethyl)amino]-1,3,5-triazin-2-yl}imino)dimethanol	C7 H14 N6 O4	246.108	2.546	13051.1	38678.6	16794.7	26086.4	13454	16284.8	13979.2	107878	106683	11273.3	9778.64	13483.5	11013.6	21692.1	14061.6	20257.7	15196.4
M_1760	Ethyl 7-nitro-1H-indole-2-carboxylate	C11 H10 N2 O4	234.064	2.502	5059.97	4728.88	6406.44	4561.08	5346.75	6434.41	5615.67	4469.56	3970.94	4592.9	4004.1	5521.14	4509.81	8515.2	5578.72	7929.19	6051.54
M_1761	Nitrosobis(2-oxopropyl)amine	C6 H10 N2 O3	158.069	1.393	37724.7	23171.8	54665	63304.3	23789.7	39129.6	50586.5	50267.5	39742.2	35009.7	44018.9	49744.5	38774.8	30364	14681.5	22542.4	19008.5
M_1762	2,4-dihydroxyheptadec-16-ynyl acetate	C19 H34 O4	326.245	9.117	1572.27	1906.36	7791.1	6559.86	4239.39	7595.45	1435.99	4384.19	1707.91	10647.8	1407.38	5809.75	5195.03	66494.9	7829.83	7517.47	6576.01
M_1763	GW7000000	C6 H8 O	96.0579	0.598	10045.6	8038.42	734.581	8830.55	7979.36	1629.9	11267.7	3916.06	62736.8	10523.5	13444.1	16837.5	9099.28	12097.9	11381.3	9333.09	66978.2
M_1764	QU1920000	C10 H20 N2 O	184.158	1.139	16112.8	13747.1	15964.7	32033.9	28306.7	9477.04	107458	11536.5	13401.3	22805.6	31156.2	89964.1	43186.1	23588.9	16718.3	13451.5	26700
M_1765	Isatin Thiosemicarbazone	C9 H8 N4 O S	220.041	7.913	54965.1	13458.3	107430	25846.2	30094.8	46850.4	28487.9	4369.88	4408.8	8778.47	23778.2	21787	17796.4	4098.75	6672.94	18077.5	53667.6
M_1766	3,4',5-Tri-tert-butylbiphenyl-4-ol	C24 H34 O	338.261	9.154	8010.61	19153.2	10291.2	7394.27	45129.2	92646.3	20265.3	12466.8	4747.71	7980.93	19838.8	7221.89	8665.46	7290.1	12035.4	36614.9	107404
M_1767	foscolic acid	C6 H11 O8 P	242.019	1.413	103022	107403	69198.5	64888.7	7596.49	5629.75	19155.4	48198.8	20315.5	12066	19456.3	8492.09	8815.68	8156.79	20422	4007.2	4297.18
M_1768	Loratadine impurity H	C8 H13 N O3	171.089	3.037	34989.7	29758.5	53105.9	49318.4	62595.6	18451.4	44822.8	68552.4	40623.6	46919	107324	43161.8	20389.1	23327.9	5895.04	5751.48	58534.4
M_1769	(+/-)-C75	C14 H22 O4	236.141	8.542	428.352	450.966	415.81	372.398	372.78	13817.7	107130	385.802	396.043	397.494	372.532	389.882	8851.22	266.578	4547.85	330.228	367.229
M_1770	MFCD00053351	C22 H43 N O3	369.325	9.074	9936.08	6315.05	1748.23	2327.03	7597.95	1505.22	9837.1	1227.41	107121	14865.1	3533.02	17019.9	8657.28	6227.52	4267.25	5816.88	2823.95
M_1771	hodgkinsine	C33 H38 N6	518.318	9.764	7193.4	2478.86	2107.02	107087	2069.77	2032.9	5490.31	2040.71	2017.99	6375.49	4820.23	6071.55	4457.86	1667.92	1723.52	6898.16	1840.34
M_1772	1-Butyl-N-(3-pyridinylmethyl)-1H-tetrazol-5-amine	C11 H16 N6	232.144	8.705	30279.4	49580.4	6828.71	7736.3	65580.7	74757.8	23077.7	47127.7	65726.8	39420.4	59900.2	61805.6	19468.1	4472.6	62957.4	7471.63	25758.1
M_1773	(9Z)-9-Octadecenamide	C18 H35 N O	281.272	9.077	6769.35	4510.88	1213.35	3856.34	96175.7	3039.79	106907	3446.63	1116.71	4442.28	3400.8	3364.81	3585.62	4542.94	4813.21	3755.17	6383.53
M_1774	2-(Dicyclohexylamino)ethanol	C14 H27 N O	225.209	9.057	3048.57	3800.88	2832.22	2940.42	106846	2443.34	85437.5	2727.59	2738.43	2532.05	2474.32	2339.31	2345.3	3458.93	3572.75	2654.46	4055.77
M_1775	DO0750000	C15 H24 O2	236.177	8.985	11889.5	9192.49	10899.2	9931.85	9046.23	10635.5	10130.5	14124.4	11432.9	9084.13	1834.47	8758.54	11883.5	22119.4	106840	8956.79	13482.1
M_1776	1,3-Dioxolane, 2-(2,4,6-trimethylcyclohex-3-enyl)-4-(1-piperidylmethyl)-	C18 H31 N O2	293.235	8.76	18529.8	17962.4	8897.63	6319.49	47412.2	66547.6	106478	22944.7	16160.7	25973.9	19820.1	5470.5	4922.4	3495.1	3458.87	2068.16	8298.96
M_1777	adrenaline	C9 H13 N O3	183.09	3.32	3391.23	3341.83	3291.18	9293.54	17691.9	1611.16	11454.4	17732.3	16148.7	14455.9	23354.5	7729.44	12872.4	106477	47927.8	74857.7	44677
M_1778	1,2,3,4,7-Pentahydroxy-1,3,4,4a,5,11b-hexahydro[1,3]dioxolo[4,5-j]phenanthridin-6(2H)-one	C14 H15 N O8	325.08	2.617	35197	28096.1	42644.8	18659.6	21303.1	24304.2	33944.1	14927.6	14188.1	27040.4	32118.7	26383	38493.7	53287.4	19434.8	26255.2	106356
M_1779	epsilon-Caprolactone	C6 H10 O2	114.068	0.594	7269.77	2508.76	1619.8	106347	4079.29	1210.99	5452.85	1993.15	1780.79	7905.06	6860.48	82325.9	3948.61	79807.1	6489.45	4285.9	6057.02
M_1780	LYSINOALANINE, (S,R)-	C9 H19 N3 O4	233.137	0.802	106002	57714.6	71041	68688.2	2253.04	3429.6	2378.23	1973.37	1560.19	2122.3	2167.36	2444.98	1935.14	5036.31	3194.54	2693.15	4301.71
M_1781	(E)-p-coumaric acid	C9 H8 O3	164.047	4.014	6861.88	8007	4831.72	4689.29	4506.17	4876.3	4890.56	4716.19	4709.42	4939.71	7369.08	4877.95	6944	35987.8	105979	39535.9	47790.4
M_1782	MFCD00093639	C12 H8 O3 S	232.019	1.258	10475.2	86067.4	22088.5	36183.7	23730.3	36679.3	22210.3	67065.8	105938	24866.7	63265.8	54120.3	38531.4	18883.2	12951	14910.5	16434.4
M_1783	NL3680000	C11 H9 N O2	187.063	8.099	21962.1	18125.7	45259.7	11163.2	51988.7	58901.2	69664.4	15917.2	6416.63	16768.3	14758.7	105898	19834.5	30885.5	28618	37089.9	33285.1
M_1784	2,2'-(5,5',10,10'-Tetrahydroxy-1,1'-dimethyl-6,6',9,9'-tetraoxo-3,3',4,4',6,6',9,9'-octahydro-1H,1'H-8,8'-bibenzo[g]isochromene-3,3'-diyl)diacetic acid	C32 H26 O14	634.134	1.208	90298.1	33302.6	70319.7	105782	8373.73	17200.6	66402.5	60121.5	36454	16663.3	49046.5	23509.2	27744.9	10709.7	9371.58	9934.61	9033.65
M_1785	4-Chloro-3-methoxy-2-methylpyridine 1-oxide	C7 H8 Cl N O2	173.025	1.291	1352.16	2005.43	1096.4	1138.84	924.004	1055.09	1633.27	2228.01	1037.62	999.186	1211.35	860.731	5614.13	1644.96	3383.6	1044.36	1042.55
M_1786	2,4-Bis(dimethylamino)-6-nitro-1,3,5-triazine	C7 H12 N6 O2	212.103	7.86	3308.72	3066.96	3327.32	105269	2665.69	2815.04	2775.72	2615.8	2702.04	2974.22	2684.65	2854.13	2097.7	2220.33	2215.69	2086.6	2345.12
M_1787	2-{4-[(2R,4S)-2-Benzyl-4-piperidinyl]-1-piperazinyl}-N-(2,6-dimethylphenyl)acetamide	C26 H36 N4 O	420.288	8.505	19793.4	4124.08	8175.13	2798.57	1228.83	4263.11	2515.22	2727.7	2097.89	3227.79	16385	12440.1	4612.79	2394.68	2112.79	2826.43	105115
M_1788	1732026	C D3 I	144.947	0.598	37591.3	35749	25141.6	44738.2	43624	4321.75	44281.3	4432.99	23541.4	64148.5	40610.6	79271.5	30185	51312.5	47769.8	65100.4	55621.8
M_1789	6-Phosphononorleucine	C6 H14 N O5 P	211.061	7.978	36594.9	77269.9	97168	22097	35616.5	27867.7	39123.4	26031.5	32188.8	37464.7	35465.7	54132.9	15937	30544.3	43546.4	38287.1	41618.7
M_1790	S-(3-Amino-2-hydroxypropyl) dihydrogen phosphorothioate	C3 H10 N O4 P S	187.007	1.325	104939	45367.6	23072.8	5036.12	5745.33	6729.28	7065.39	14776	12649.4	11468.1	6526.7	6403.99	8999.99	10080.8	6060.34	5857.96	5392.08
M_1791	N-[(3R,6R,7S)-4-(4-Fluorobenzyl)-7-methoxy-3,6,9-trimethyl-10-oxo-3,4,5,6,7,8,9,10-octahydro-2H-1,4,9-benzoxadiazacyclododecin-12-yl]cyclopentanecarboxamide	C30 H40 F N3 O4	525.299	9.691	38878.7	49090.9	23956.4	58394.6	56703.8	50698.3	74662.6	46099.8	43564.7	104809	38524.1	45158.5	46372.3	2447.11	31575.1	34551.9	83377.6
M_1792	Gly-Lys	C8 H17 N3 O3	203.126	1.349	1281.25	1238.76	1408.13	1292.45	1814.15	1402.92	1317.35	1326.91	1012.08	1133.13	1156.59	1338.85	1148.43	104773	4495.37	22338.4	7850.53
M_1793	1,1,1-Trifluoroacetylacetone	C5 H5 F3 O2	154.025	2.773	58797.2	32607.3	83291.1	29638.7	27135.3	104423	36856.1	4217.14	7556.02	32943.2	36580.4	45188.3	62354.2	89893.4	9096.44	2571.96	47911.8
M_1794	3-Vinyl-1,2,3-dioxaborolane	C4 H7 B O2	98.0542	1.068	3699.22	4396.84	4103.5	3903.59	3919.02	3761.18	5170.42	4541.55	3867.52	5714.08	5379.39	3951.06	3722.34	25853.2	104300	3507.5	7491.72
M_1795	Ritipenem	C10 H12 N2 O6 S	288.042	3.497	100262	79575	104068	45771.4	77781.1	78784.6	66156.5	84664	47254	37276.8	39374	89108.3	36012.3	17481.9	26637.6	38562.2	44674
M_1796	Leu-Val	C11 H22 N2 O3	230.163	2.933	104065	84825.3	102063	82265.5	20685.3	48050.8	58568.2	33741.7	2564.63	40142.6	13070.9	57735.8	46147.8	2569.67	2111.04	2082.61	2150.75
M_1797	N~2~,N~2~,N~4~,N~4~,N~6~-Pentaethyl-1,3,5-triazine-2,4,6-triamine	C13 H26 N6	266.222	9.633	1029.58	4709.9	104063	2542.52	1832.47	1253.49	1263.47	1924.37	6880.64	4875.08	2251.03	1706.18	1570.42	4214.41	2342.6	692.347	4619.75
M_1798	N,N-Bis(aminomethyl)methanediamine	C3 H12 N4	104.106	1.077	66622.1	73924.6	49014.3	61223.1	61831.3	56998.4	7472.38	73533.8	61515.2	75087.9	65549.2	64666.2	62904.4	55953.2	103814	56511	71292
M_1799	Indole	C8 H7 N	117.058	7.392	10262.2	13304.3	12811.3	14446.8	8094.07	12250.8	10568.7	5417.32	5782.95	4387.95	1555.86	7330.27	1256.01	3775.76	1131.81	3077.69	1198.7
M_1800	2-Hydroxy-3-(phosphonooxy)propyl myristate	C17 H35 O7 P	382.212	8.898	1621.02	44358.9	1136.31	3115.76	8674.58	1716.83	596.916	811.923	703.231	1443.1	1258.38	554.362	1187.1	103794	3719.03	682.907	2250.58
M_1801	1-Cyclohexyl-3-(2-hydroxyethyl)thiourea	C9 H18 N2 O S	202.115	1.479	2937.07	2985.67	4473.67	2834.92	3877.76	5561.15	4646.43	2902.64	3287.15	8842.48	4196.46	3336.33	2023.35	103749	34811	3874.76	25706.1
M_1802	1-[(8Z,11Z,14Z)-icosatrienoyl]-sn-glycero-3-phosphocholine	C28 H52 N O7 P	545.346	9.856	59500.1	48213.7	52164.6	103572	44825.7	62406.7	46901.8	87076.1	40285.5	72881.5	50537.5	40113.6	37058.9	1130.83	37731.4	2967.2	30603.4
M_1803	p-Cresol	C7 H8 O	108.058	0.67	63841.5	6960.94	9779.18	4095.4	4062.71	18263.4	27267.5	18497.9	20740.2	20781.8	29033.5	9662.76	22283.2	7677.72	6766.9	30044.9	20803.8
M_1804	2-Chloro-1,3,2-oxathiaphospholane	C2 H4 Cl O P S	141.941	1.906	63161.8	98866.1	89231.7	102984	26597.5	77176.8	36120.8	26212.1	33503.7	43485.5	26736.3	27095.6	50981.1	82636.3	21744.3	19599.1	20294.2
M_1805	2-(4-Chlorophenyl)-2-oxoethyl 3-methoxybenzoate	C16 H13 Cl O4	304.05	0.83	38069	34749.6	62650.6	28099.3	13499.8	34152.5	13272.1	10799.5	5297.78	9006.14	8818.3	20688.3	10474.7	102699	18902.3	25892.4	17264.3
M_1806	SKF-91488	C7 H17 N3 S	175.115	1.253	40998.5	37916.6	64170.3	63634.2	50349.9	96505.3	101663	53575.2	27013.8	87264.9	88160.3	102662	41918.5	45685.9	67515.6	25410	54807.9
M_1807	3-Methyl-N~7~-nitro[1,2,4]triazolo[4,3-a][1,3,5]triazine-5,7-diamine	C5 H6 N8 O2	210.062	1.507	30251.8	930.817	27284.9	39784.5	23286	41173.3	31389.9	21985.2	21731.9	25224.4	102489	28568.8	26049.7	7772.07	6129.41	9215.58	28030
M_1808	N-(2-Hydroxypropyl) methacrylamide	C7 H13 N O2	143.095	1.077	2161.87	4474.25	2047.13	2304.35	1860.14	1763.42	1902.67	16103.2	5112.51	30857.3	6402.91	21833.6	2067.33	2821.61	1998.64	102205	14097.5
M_1809	N-(Phosphonomethyl)-D-glutamine	C6 H13 N2 O6 P	240.051	1.764	102104	83655.6	84420.6	95488.1	5662.17	2545.14	788.423	37997.1	2754.65	47017.4	31971.1	7100.8	921.663	44206	2968.71	5796.21	2980.7
M_1810	Spirostan-3-yl acetate	C29 H46 O4	458.339	9.064	6796.48	8456.14	6172.4	6454.35	6113.74	5310.8	5830.15	6867.41	6008.45	5921.48	5314.35	5561.55	5577.13	18911.7	24669.8	52945.8	102100
M_1811	g-Butyrobetaine	C7 H15 N O2	145.11	2.74	38740.1	36346.7	49049	30572.9	25294.6	76187.6	44311.9	47010.6	31236.8	42783.4	48040.4	101885	99081.2	29949.6	40251	29654.4	78611.6
M_1812	glas#16	C22 H40 O11	480.255	6.573	47081.2	101042	55241.7	57903	41457.9	43591.9	55286.2	65441.9	91213.9	35062.3	29713.3	40481	48375.1	40884.8	21302.8	48208.3	39223.2
M_1813	2450705	C8 H15 N O4 S	221.072	3.397	13601.8	19467.5	21503.5	46546.1	25163.1	19571.2	25775.7	45449.1	15239.8	22993.6	32884.1	8308.14	23252.3	101032	22626.8	55651.1	61830.6
M_1814	Phenolate	C6 H5 O	93.0346	2.445	71193.9	59564.9	100953	49618.3	73947.3	77783.6	87260.8	56287.2	30876.7	41407.3	44115.4	44545.1	39346.7	67014.4	57461.7	65794.8	90294.5
M_1815	N~2~-(tert-Butoxycarbonyl)-N~6~-formyl-L-lysine	C12 H22 N2 O5	274.153	5.273	34533.5	35590.9	31864.6	100898	49098.1	2817.99	34467.4	2549.76	39834.7	2686.99	2779.89	2709.19	2705.9	2866	2771.64	2903.27	2838.24
M_1816	4-(2,5-Diethoxy-4-nitrophenyl)morpholine	C14 H20 N2 O5	296.137	2.161	2303	3453.75	2363.88	2834.06	2575.63	2312.8	3826.41	2512.27	2437.1	2383.21	2595.29	2370.23	2280.56	49194.6	100646	2719.99	3107.62
M_1817	(2R)-3-Hydroxy-2-{[(5Z,8Z,11R,12E,14Z)-11-hydroxy-5,8,12,14-icosatetraenoyl]oxy}propyl 2-(trimethylammonio)ethyl phosphate	C28 H50 N O8 P	559.328	8.843	7715.46	11200.1	11497.1	37277	7029.3	7716.75	12173.9	28765.7	44758.4	100590	9077.74	19527.8	16393.1	4434.41	29340.2	10924.7	17023.5
M_1818	(2-Amino-3-hydroxybutanoyl)oxonium	C4 H10 N O3	120.065	2.392	45275.9	42933.5	26576.6	39162.9	46346.2	36645.2	43679.2	2669.69	60478.5	50060.4	59705.5	61276.2	10329.1	14167.4	100481	39755.2	66331.5
M_1819	(2S)-2-({N-[(2S)-2-Ammoniopropanoyl]-L-leucyl}amino)propanoate	C12 H23 N3 O4	273.169	2.4	100369	5307.08	6654.95	9748.27	5618.97	6855.95	5989.01	4750.46	4281.14	5066.31	4235.45	5849.97	4672	9524.51	6143.12	9835.28	6673.41
M_1820	(2E)-2-(methylthiomethyl)-3-phenyl-2-propenal	C11 H12 O S	192.061	5.023	553.613	863.949	543.104	497.493	638.616	533.919	577.844	517.478	499.205	1739.98	991.337	892.777	670.996	11161.9	2837.08	1623.08	1891.21
