# Supplementary material for: Age-dependent remodeling of gut microbiome and host serum metabolome in mice
Source: Aging (Albany NY). 2021 Feb 17;13(5):6330–45. doi: 10.18632/aging.202525 (PMC7993679; doi:10.18632/aging.202525)
Supplement: Supplementary Table 2 [file aging-13-202525-s002.xls]

## Sheet: Anova
Supplementary Table 2. List of metabolite features that were significantly altered in the 4 age groups.
Peak	Name	m.z	RT [min]	p.value	t.score	FDR	Tukey's HSD
M_0001	(1,5-Cyclohexadien-1-ylsulfonyl)benzene	220.056	1.13	0.0084881	6.0089	0.032183	28M-03M; 28M-12M; 28M-18M
M_0003	2,4,6-tricyclohexyloxy-1,3,5-triazine	375.252	8.425	0.00015726	15.123	0.0018347	28M-03M; 28M-12M; 28M-18M
M_0011	1H-1,2,4-triazolo[4,3-b][1,2,4]triazole-3,6-diamine	139.061	1.144	0.0093348	5.8518	0.034391	28M-03M; 28M-12M
M_0012	(2-Amino-3-hydroxybutanoyl)oxonium	120.065	1.195	0.00022926	14.006	0.0023245	28M-03M; 28M-12M; 28M-18M
M_0026	Acetophenone	120.058	1.333	0.010727	5.626	0.037739	28M-12M; 28M-18M
M_0027	aloxistatin	342.217	9.094	5.2796e-05	18.745	0.00081432	28M-03M; 28M-12M; 28M-18M
M_0028	quinapyramine	310.191	9.1	5.3344e-05	18.708	0.00081492	28M-03M; 28M-12M; 28M-18M
M_0034	Υ-Aminobutyric acid (GABA)	103.064	1.061	0.00023229	13.968	0.0023357	28M-03M; 28M-12M; 28M-18M
M_0039	16(R)-HETE	302.224	9.094	1.6334e-05	23.379	0.00034567	28M-03M; 28M-12M; 28M-18M
M_0041	1-arachidonoyl-sn-glycero-3-phosphocholine	543.333	9.785	0.0022322	8.4709	0.011542	28M-12M; 28M-18M
M_0045	D-PANTOTHENIC ACID	219.111	3.322	6.2805e-07	41.629	3.2149e-05	12M-03M; 28M-03M; 28M-12M; 28M-18M
M_0048	N-methylethanolamine phosphate	155.035	1.149	0.0020591	8.6363	0.010831	12M-03M; 18M-03M; 28M-03M
M_0072	Choline	103.1	10.459	0.0012912	9.6327	0.0077539	28M-03M; 28M-12M; 28M-18M
M_0074	1H-1,2,4-triazolo[4,3-b][1,2,4]triazole-3,6-diamine	139.061	1.357	0.0083508	6.0361	0.031862	28M-03M; 28M-12M; 28M-18M
M_0076	Spermidine	145.158	0.817	8.8943e-05	16.939	0.0011816	12M-03M; 18M-03M; 28M-03M
M_0080	Acetyl-L-carnitine	203.116	1.096	7.5585e-05	17.487	0.0010447	12M-03M; 18M-03M; 28M-03M; 28M-12M; 28M-18M
M_0082	N-methylethanolamine phosphate	155.035	1.254	0.0033811	7.6519	0.015778	28M-03M; 28M-18M
M_0117	4-Hydroxyisoleucine	147.09	1.206	0.00013158	15.674	0.0016073	28M-03M; 28M-12M; 28M-18M
M_0120	g-Butyrobetaine	145.11	1.246	2.1746e-05	22.171	0.00043585	28M-03M; 28M-12M; 28M-18M
M_0124	Nicotinamide	122.048	1.386	1.8705e-05	22.8	0.0003825	28M-03M; 28M-12M; 28M-18M
M_0130	(1R,4aS)-7-(2-Hydroxypropan-2-yl)-1,4a-dimethyl-9-oxo-3,4,10,10a-tetrahydro-2H-phenanthrene-1-carboxylic acid	330.181	8.762	0.0033302	7.681	0.015581	12M-03M; 18M-03M; 28M-03M
M_0139	Caprolactam	113.084	4.426	0.00054136	11.688	0.0041927	12M-03M; 18M-03M; 28M-12M; 28M-18M
M_0141	(2-Amino-3-hydroxybutanoyl)oxonium	120.065	1.422	0.0098478	5.7643	0.035567	28M-12M; 28M-18M
M_0154	(E)-p-coumaric acid	164.047	1.239	0.0074736	6.2229	0.029064	18M-03M; 28M-03M
M_0158	Diethoxyethylamine	133.11	1.07	0.0026037	8.1613	0.013127	28M-03M; 28M-12M; 28M-18M
M_0159	Trimethylamine N-oxide	75.0684	1.079	0.00036618	12.705	0.0031289	28M-03M; 28M-12M; 28M-18M
M_0161	D-(+)-Pyroglutamic Acid	129.043	1.309	0.015156	5.0843	0.049257	28M-12M; 28M-18M
M_0162	2,6-Dimethylpyrazine	108.069	0.804	0.0016379	9.116	0.009305	28M-03M; 28M-12M; 28M-18M
M_0169	N-Methylhistamine	125.096	0.806	0.0017686	8.9532	0.0097882	28M-03M; 28M-12M; 28M-18M
M_0171	DL-Arginine	174.112	0.863	0.0087195	5.9643	0.032897	12M-03M; 18M-03M; 28M-03M
M_0173	4-Nitro-N-(tetrahydro-2-furanylmethyl)benzamide	250.095	6.379	9.0511e-06	26.046	0.00022261	28M-03M; 28M-12M; 28M-18M
M_0194	Inosine-5'-monophosphate (IMP)	348.047	2.671	0.00025612	13.689	0.0024535	12M-03M; 28M-03M; 28M-12M; 28M-18M
M_0195	Dimethylphosphoramidocyanidic acid	134.025	0.792	0.00018881	14.573	0.0020645	12M-03M; 18M-03M; 28M-12M; 28M-18M
M_0202	2,4,7-Pteridinetriamine	177.076	7.465	0.0016567	9.0917	0.009364	28M-03M; 28M-12M; 28M-18M
M_0206	Allantoin	158.044	1.176	8.6248e-06	26.274	0.00021844	28M-03M; 28M-12M; 28M-18M
M_0208	Indole-3-lactic acid	205.074	7.262	5.3731e-05	18.682	0.00081492	28M-03M; 28M-12M; 28M-18M
M_0214	Muscimol	114.043	1.295	0.0092833	5.8609	0.034271	28M-18M
M_0217	3,5-Dimethylpyrazole	96.069	0.798	0.00020692	14.303	0.002152	12M-03M; 18M-03M; 28M-12M; 28M-18M
M_0222	trans,trans-2,4-Heptadienal	110.074	8.27	0.0010364	10.127	0.006786	28M-12M; 28M-18M
M_0223	1-(3-Azido-2,3-dideoxypentofuranosyl)-5-methyl-2,4(1H,3H)-pyrimidinedione	267.097	1.61	0.00030138	13.235	0.0027426	12M-03M; 18M-03M; 28M-03M
M_0225	Isatin	147.032	4.898	0.0071455	6.2993	0.027847	12M-03M; 18M-03M
M_0227	Acetyl-L-carnitine	203.116	1.422	0.0039775	7.3452	0.01776	12M-03M; 28M-03M
M_0228	Diethylpyrocarbonate	162.053	1.145	0.0057396	6.6797	0.023795	28M-03M; 28M-12M; 28M-18M
M_0236	N4-(2,2-DIMETHYL-1-METHYLCARBAMOYL-PROPYL)-2,N1-DIHYDROXY-3-ISOBUTYL-SUCCINAMIDE	331.211	4.266	0.0016412	9.1118	0.009305	12M-03M; 18M-03M; 28M-03M
M_0241	Trigonelline	137.048	1.159	5.943e-06	28.099	0.0001664	28M-03M; 28M-12M; 28M-18M
M_0242	4H-Benzotriazol-4-one	133.028	0.79	0.0002347	13.938	0.002347	12M-03M; 18M-03M; 28M-12M; 28M-18M
M_0244	5-(Nitroimino)hexahydroimidazo[4,5-d]imidazol-2(1H)-one	186.05	1.197	0.00020364	14.35	0.0021424	18M-03M; 28M-03M; 28M-12M; 28M-18M
M_0248	octyl methoxycinnamate	290.188	8.767	0.0077447	6.1626	0.029863	12M-03M; 18M-03M; 28M-03M
M_0258	butyl acrylate	128.084	7.763	0.002013	8.683	0.010681	12M-03M; 18M-03M
M_0260	L-Glutamic acid	147.053	1.109	0.0064637	6.4719	0.02563	28M-03M
M_0270	1-[2-Hydroxy-3-(phenylthio)propyl]piperidine-4-carboxamide	294.144	8.327	0.001786	8.9326	0.0098201	28M-03M; 28M-12M; 28M-18M
M_0276	Adenosine	267.097	1.433	0.0003406	12.9	0.0030092	12M-03M; 18M-03M; 28M-03M
M_0281	N-[(2S,3S)-5-[(2S)-1-hydroxypropan-2-yl]-3-methyl-2-(methylaminomethyl)-6-oxo-2,3,4,7-tetrahydro-1,5-benzoxazonin-9-yl]cyclopropanecarboxamide	389.231	8.981	0.00010312	16.452	0.0013033	28M-03M; 28M-12M; 28M-18M
M_0285	5-Hydroxyindole-3-acetic acid	191.058	2.211	6.4629e-06	27.679	0.00017822	28M-03M; 28M-12M; 28M-18M
M_0292	Creatine	131.07	1.324	0.0060588	6.5846	0.024606	18M-03M; 28M-03M
M_0294	N6,N6,N6-Trimethyl-L-lysine	188.153	1.071	0.00068633	11.1	0.0050037	12M-03M; 18M-03M; 28M-03M
M_0297	L-Kynurenine	208.085	2.207	5.6161e-06	28.385	0.00016224	28M-03M; 28M-12M; 28M-18M
M_0300	2-Methoxyestradiol	302.186	8.778	7.1908e-05	17.658	0.0010224	28M-03M; 28M-12M; 28M-18M
M_0303	2,3-Dimethyl-benzothiazol-3-ium	164.054	0.792	0.00027312	13.508	0.0025491	12M-03M; 18M-03M; 28M-12M; 28M-18M
M_0304	2-(14,15-Epoxyeicosatrienoyl) glycerol	372.288	9.049	0.0048123	6.9949	0.020754	12M-03M; 18M-03M; 28M-03M
M_0305	tin(ii) hydride	121.917	1.054	0.0010309	10.139	0.006786	12M-03M; 18M-03M; 28M-03M
M_0308	Glycidyl Stearate	340.298	10.522	0.0013665	9.5079	0.0080746	28M-03M; 28M-12M; 28M-18M
M_0324	2,5,8,11-Tetraoxanonadecane	276.23	8.923	0.002325	8.3883	0.011853	28M-03M; 28M-12M; 28M-18M
M_0329	4-Indolecarbaldehyde	145.053	7.397	3.5429e-05	20.228	0.00060478	28M-03M; 28M-12M; 28M-18M
M_0330	1,1-Dimethyl-3-(2H-tetrazol-5-yl)urea	156.076	3.519	0.0015839	9.1877	0.0090652	28M-03M; 28M-12M; 28M-18M
M_0332	Inosine-5'-monophosphate (IMP)	348.047	2.764	9.6742e-05	16.661	0.0012487	12M-03M; 18M-03M; 28M-03M; 28M-12M; 28M-18M
M_0338	CAPROYL SARCOSINE	243.183	8.289	0.0021727	8.5261	0.011298	28M-12M; 28M-18M
M_0339	N-[2-(1-Cyclohexen-1-yl)ethyl]-4,6-di(4-morpholinyl)-1,3,5-triazin-2-amine	374.243	9.356	0.00024196	13.851	0.0023933	12M-03M; 18M-03M; 28M-03M
M_0345	p-Decyloxybenzaldehyde	262.193	8.777	9.7022e-06	25.719	0.00023214	28M-03M; 28M-12M; 28M-18M
M_0346	Ethyl 3-isopropyl-1H-pyrazole-5-carboxylate	182.106	2.441	0.0037528	7.4541	0.017138	28M-12M; 28M-18M
M_0352	5-O-methyl embelin	308.198	8.746	0.0012609	9.6852	0.0076403	12M-03M; 18M-03M; 28M-03M
M_0353	Pregabalin	159.126	5.121	0.00013592	15.572	0.0016492	12M-03M; 18M-03M; 28M-12M; 28M-18M
M_0354	3H-1,2,3-triazolo[4,5-d]pyrimidine-5,7-diamine	151.061	1.099	0.0091128	5.8914	0.033795	28M-12M; 28M-18M
M_0360	N-Methyl-N-(1,2,2,6,6-pentamethyl-piperidin-4-yl)-4-tetrazol-1-yl-benzamide	356.233	9.402	0.00050605	11.859	0.0040044	12M-03M; 18M-03M
M_0363	1-(3-Chloro-2-fluorophenyl)-3-(dimethylamino)prop-2-en-1-one	227.056	7.262	0.00021705	14.164	0.0022269	28M-03M; 28M-12M; 28M-18M
M_0368	procodazole	190.074	2.414	9.8838e-07	38.51	4.0883e-05	28M-03M; 28M-12M; 28M-18M
M_0369	monomethyl phosphate	111.993	1.73	2.6932e-05	21.302	0.00052145	12M-03M; 18M-03M; 28M-03M; 28M-12M; 28M-18M
M_0370	2-[2-(2,6-Dimethylmorpholino)-2-oxoethoxy]phenyl N,N-dimethylcarbamate	336.17	8.972	5.1174e-08	63.411	4.6568e-06	28M-03M; 28M-12M; 28M-18M
M_0378	3-[1,3,3-Tris(allyloxy)propoxy]-1-propene	268.167	8.565	0.012005	5.4465	0.040839	28M-03M; 28M-18M
M_0386	mephenesin	182.094	7.763	6.3502e-05	18.089	0.00092459	28M-03M; 28M-12M; 28M-18M
M_0387	1-Linoleoyl glycerol	354.277	9.644	0.010741	5.6238	0.037739	12M-03M; 18M-03M
M_0400	1-Methyl-1H-purin-1-ium	135.066	4.426	0.00048134	11.987	0.0038592	12M-03M; 18M-03M; 28M-12M; 28M-18M
M_0402	Creatinine	113.059	1.155	5.24e-05	18.773	0.00081432	28M-03M; 28M-12M; 28M-18M
M_0404	1-carboxy-3-hydroxyadamantane	196.11	7.785	0.0012753	9.66	0.0076858	18M-03M; 28M-12M; 28M-18M
M_0408	Phosphoramidocyanidic acid	105.994	0.792	0.00034305	12.881	0.0030162	12M-03M; 18M-03M; 28M-12M; 28M-18M
M_0417	Tris(((2-aminoethyl)amino)methyl)phenol	310.248	9.428	0.014299	5.1736	0.047134	18M-03M; 18M-12M
M_0421	Leu-Val	230.163	2.61	6.2347e-11	186.41	1.4184e-08	12M-03M; 18M-03M; 28M-03M
M_0427	(E)-di-tert-butyl diazene-1,2-dicarboxylate	230.127	3.166	1.3094e-05	24.349	0.00029062	12M-03M; 28M-03M; 28M-12M; 28M-18M
M_0428	5-Hydroxydecanoic acid	188.141	8.184	0.0011103	9.9703	0.0070902	12M-03M; 28M-03M
M_0429	4,6-Bis(ethylamino)-1,3,5-triazine-2-carboxamide	210.123	8.197	0.00012812	15.757	0.0015756	12M-03M; 28M-03M; 28M-12M; 28M-18M
M_0438	(1Z,5Z)-1,5-Cyclooctadiene	108.094	8.284	0.0043657	7.1727	0.019146	12M-03M; 18M-12M; 28M-12M
M_0447	3-Hydroxy-L-proline	131.058	2.019	8.0433e-07	39.9	3.4854e-05	28M-03M; 28M-12M; 28M-18M
M_0452	bendiocarb	223.084	4.827	0.010252	5.699	0.036514	28M-18M
M_0455	Cumene	120.094	7.817	0.0051104	6.8865	0.02148	12M-03M; 28M-12M; 28M-18M
M_0464	Trigonelline	96.0214	1.419	0.015228	5.077	0.049316	28M-03M; 28M-12M; 28M-18M
M_0470	3-(imidazol-4-yl)-2-oxopropyl dihydrogen phosphate	220.026	4.193	0.00019258	14.514	0.0020645	18M-03M; 28M-12M; 28M-18M
M_0476	metharbital	198.1	2.792	0.0027058	8.085	0.013529	28M-03M; 28M-12M; 28M-18M
M_0477	Cinnamoylglycine	205.074	7.497	0.011019	5.5829	0.038417	28M-03M
M_0478	N-Methyl-2-pyrrolidone	99.0689	3.253	0.0061381	6.5618	0.024782	18M-03M; 28M-03M
M_0481	[4-[1-(1-cyclopentyl-5-tetrazolyl)propyl]-1-piperazinyl]-(2-furanyl)methanone	358.212	8.881	1.3976e-05	24.06	0.00030281	28M-03M; 28M-12M; 28M-18M
M_0485	Imidazosagatriazinone	290.173	8.169	0.00033789	12.922	0.0029998	28M-03M; 28M-12M; 28M-18M
M_0486	Thieno[3,4-d]-1,3-dithiol-2-thione	189.905	0.974	0.00086502	10.546	0.0059634	12M-03M; 18M-03M; 28M-03M
M_0488	2-(4-Chlorophenyl)-1,3-dithiolane	215.983	8.4	5.6561e-05	18.498	0.00085076	12M-03M; 18M-12M; 28M-12M
M_0491	6-Methylnicotinamide	136.064	1.08	0.015112	5.0887	0.049203	28M-03M
M_0493	Vigabatrin	129.079	0.849	0.00083027	10.643	0.0058027	12M-03M; 18M-03M; 28M-03M
M_0503	DL-Tryptophan	204.09	2.946	3.0697e-06	31.604	9.9766e-05	28M-03M; 28M-12M; 28M-18M
M_0504	7-ketodeoxycholic acid	406.272	8.591	0.0031554	7.7847	0.015074	28M-12M
M_0507	4-Amino-3-hydroxybenzoic acid	153.043	2.335	0.0090776	5.8977	0.033795	28M-03M; 28M-18M
M_0515	Thiomalic acid	149.998	7.531	0.0037239	7.4687	0.017072	28M-12M; 28M-18M
M_0523	g-Butyrobetaine	145.11	2.955	7.4795e-05	17.523	0.0010447	12M-03M; 28M-03M; 28M-12M; 28M-18M
M_0528	Guanosine monophosphate	363.058	2.252	0.010222	5.7037	0.03648	28M-03M
M_0530	2-Butoxyethanol acetate	160.11	8.12	0.0032028	7.7559	0.015101	28M-03M; 28M-12M; 28M-18M
M_0532	Choline Alfoscerate	257.103	1.419	0.011997	5.4476	0.040839	28M-03M; 28M-12M; 28M-18M
M_0533	1-Boc-4-piperidinol	201.136	8.126	0.0044744	7.1276	0.019528	28M-03M; 28M-12M; 28M-18M
M_0537	glycyclamide	296.119	4.32	6.112e-10	129.84	1.0113e-07	12M-03M; 18M-03M; 28M-03M
M_0538	1',3'-Dimethyl-1,4':5',1''-terimidazolidine-2,2',2''-trione	282.144	8.121	0.0012463	9.7111	0.0076062	28M-03M; 28M-12M; 28M-18M
M_0539	bis(tetrazolyl)amine	153.051	1.305	1.3829e-05	24.107	0.00030281	28M-03M; 28M-12M; 28M-18M
M_0541	Eicosapentaenoic acid methyl ester	316.24	9.402	0.0001974	14.441	0.002101	12M-03M; 18M-03M
M_0551	AC-VAL-OH	159.09	3.26	0.0011692	9.8537	0.0072629	18M-03M; 28M-03M; 18M-12M
M_0553	Arsonate	123.916	0.983	0.00017509	14.798	0.001955	12M-03M; 18M-03M; 28M-03M
M_0560	monomethyl phosphate	111.993	1.455	7.9166e-07	40.009	3.4854e-05	12M-03M; 18M-03M; 28M-03M; 28M-12M; 28M-18M
M_0567	2-Indolylformic acid	161.048	4.897	0.0051383	6.8767	0.021548	28M-03M; 28M-12M; 28M-18M
M_0569	4-Morpholino-1,3,5-triazin-2-amine	181.096	1.742	0.0010731	10.048	0.0069255	28M-03M; 28M-12M; 28M-18M
M_0572	tert-Butyl N-[1-(aminocarbonyl)-3-methylbutyl]carbamate	230.163	2.31	8.1625e-09	85.617	1.238e-06	12M-03M; 18M-03M; 28M-03M
M_0574	Thieno[3,4-d]-1,3-dithiol-2-thione	189.905	1.055	0.00090169	10.449	0.0061695	12M-03M; 18M-03M; 28M-03M
M_0582	5-Hydroxy-DL-tryptophan	220.085	2.783	0.00028835	13.357	0.0026505	28M-03M; 28M-12M; 28M-18M
M_0583	Gly-Lys	203.127	1.223	5.0929e-05	18.876	0.00079906	28M-03M; 28M-12M; 28M-18M
M_0587	N-Acetylornithine	174.1	1.144	1.1713e-08	80.739	1.4211e-06	12M-03M; 18M-03M; 28M-03M; 28M-12M; 28M-18M
M_0588	lactide	144.042	1.149	0.0013235	9.578	0.0078978	28M-03M; 28M-12M; 28M-18M
M_0595	2-[1-Hydroxy-2-(trimethylammonio)ethyl]-3-oxododecanoat	315.241	9.398	9.2408e-05	16.812	0.0012099	12M-03M; 18M-03M; 28M-03M
M_0597	Boc-Gln-Oh	246.121	2.523	0.0001275	15.773	0.0015756	12M-03M; 28M-03M; 28M-12M; 28M-18M
M_0601	Butyl O-phosphonoserinate	241.072	1.098	1.0811e-07	56.014	7.5679e-06	12M-03M; 18M-03M; 28M-03M; 28M-12M; 28M-18M
M_0605	2'-Deoxy-5'-O-phosphonatocytidine	305.04	1.163	0.0002492	13.767	0.0024362	28M-03M; 28M-12M; 28M-18M
M_0607	Norethindrone	298.193	8.707	6.9998e-07	40.863	3.3525e-05	18M-03M; 28M-03M; 28M-12M; 28M-18M
M_0609	Methyl palmitate	287.282	7.761	0.014887	5.1117	0.048731	28M-12M; 28M-18M
M_0611	L-Glutamic acid	147.053	1.283	0.0089472	5.9216	0.033506	12M-03M; 28M-03M
M_0612	trans-beta-Nitrostyrene	149.048	4.599	0.00051445	11.817	0.0040533	12M-03M; 28M-03M; 28M-18M
M_0614	6-Methyl[1,2,4]triazolo[4,3-b]pyridazin-8-ol	150.054	2.325	0.00088366	10.496	0.0060689	12M-03M; 18M-03M
M_0618	1-(2-Methyl-2-propanyl)-1,3-cyclopentadiene	122.11	7.826	0.0026907	8.0961	0.01349	28M-03M; 28M-12M; 28M-18M
M_0620	Indole	117.058	7.536	0.0024435	8.2882	0.012422	28M-03M; 28M-12M; 28M-18M
M_0623	Oxprenolol	265.165	8.291	0.00050314	11.874	0.0039988	28M-12M; 28M-18M
M_0624	Methyl isonicotinate	137.048	1.44	0.0084336	6.0197	0.032111	28M-03M; 28M-12M; 28M-18M
M_0625	Sorbic acid	112.053	0.709	0.0002419	13.852	0.0023933	12M-03M; 28M-03M; 18M-12M
M_0629	gamma-Glu-gln	275.112	1.156	0.0035951	7.5351	0.016607	12M-03M; 18M-03M; 28M-03M
M_0631	cyclandelate	276.172	8.804	0.0031877	7.765	0.015101	18M-03M; 28M-03M
M_0633	Nithiazide	216.031	6.415	0.00030989	13.158	0.0027921	28M-03M; 28M-12M; 28M-18M
M_0636	Ethyl 2-oxocyclohexanecarboxylate	170.094	7.812	0.0063355	6.5067	0.025342	12M-03M; 28M-03M
M_0640	4-Vinylpyridine	105.058	2.777	0.0098494	5.7641	0.035567	28M-03M
M_0650	[4-(Phenylsulfanyl)phenyl]methanol	216.061	1.215	4.7157e-05	19.156	0.00074631	28M-03M; 28M-12M; 28M-18M
M_0652	2,4a,9-Trimethyl-2,3,4,4a,9,9a-hexahydro[1,2]oxazino[6,5-b]indol-6-yl octylcarbamate	389.268	8.526	0.00047969	11.996	0.0038592	28M-03M; 28M-12M; 28M-18M
M_0657	2-Isopropyl-5-methylbenzoic acid	178.099	8.426	0.004167	7.2587	0.018452	18M-03M; 28M-12M; 28M-18M
M_0661	1,3-Dihydro[1,2,5]oxadiazolo[3,4-b]pyrido[2',3':5,6]pyrazino[2,3-e]pyrazine	227.056	7.495	0.0075744	6.2002	0.029393	28M-03M
M_0662	Bucillamine	223.034	6.039	0.0032448	7.7308	0.01526	12M-03M
M_0675	Desaminotyrosine	166.063	7.773	0.001505	9.2977	0.0087791	18M-03M; 28M-12M; 28M-18M
M_0677	Diethylol dimethyl hydantoin	216.111	2.395	6.962e-07	40.901	3.3525e-05	28M-03M; 28M-12M; 28M-18M
M_0681	Dimethyl-3,3'-dithiobispropionimidate	234.049	0.975	0.0047272	7.0273	0.020484	18M-03M; 28M-03M
M_0685	5-cyanouracil	137.023	0.793	0.00025031	13.755	0.0024362	12M-03M; 18M-03M; 28M-12M; 28M-18M
M_0688	2,2'-[(6-Anilino-1,3,5-triazine-2,4-diyl)diimino]diethanol	290.149	8.513	0.0038418	7.4101	0.01735	12M-03M; 18M-03M; 28M-12M; 28M-18M
M_0694	N-Acetoxy-2-(3-nitro-4,5-dihydro-1H-pyrazol-1-yl)acetamide	230.065	1.919	0.0050792	6.8975	0.021448	12M-03M; 18M-03M; 28M-03M
M_0695	(2E)-4,4,4-Trifluoro-2-butenal	124.014	1.81	0.00037801	12.62	0.0031704	12M-03M; 18M-03M; 28M-03M
M_0696	1-heptadecanoyl-sn-glycero-3-phosphocholine	509.349	10.608	0.0060017	6.6012	0.024546	18M-12M; 28M-12M
M_0698	Gly-Lys	203.127	1.189	3.2394e-05	20.574	0.00057781	28M-03M; 28M-12M; 28M-18M
M_0699	3-Oxalomalic acid	206.007	1.08	0.0015748	9.2001	0.0090415	12M-03M; 28M-03M
M_0702	Butoxytriglycol	206.152	7.431	0.00052449	11.768	0.0041145	28M-03M; 28M-12M; 28M-18M
M_0708	5,7-Dihydroxytryptamine	192.09	4.912	0.0039494	7.3584	0.017704	12M-03M; 28M-12M
M_0710	Eicosatetraynoic acid	314.188	8.389	4.5009e-11	196.23	1.3987e-08	28M-03M; 28M-12M; 28M-18M
M_0714	12-HHTrE	280.203	8.863	0.0094616	5.8297	0.034788	28M-03M
M_0716	Boc-4-piperidone	199.121	7.97	2.3101e-06	33.225	7.8119e-05	28M-03M; 28M-12M; 28M-18M
M_0717	3-Hydroxy-L-proline	131.058	1.792	0.003031	7.8626	0.014594	28M-03M; 28M-12M
M_0718	Alphenal	244.085	3.77	0.00035732	12.771	0.0030967	12M-03M; 18M-03M; 28M-03M
M_0720	Azanidazole	246.087	8.141	0.0011411	9.9085	0.0071863	28M-03M; 28M-12M; 28M-18M
M_0722	(9aR,9bS)-9a-Hydroxy-6,9-dimethyl-3-methylene-3,3a,4,5,9a,9b-hexahydroazuleno[4,5-b]furan-2,7-dione	238.12	8.187	0.0098032	5.7717	0.035567	28M-12M; 28M-18M
M_0725	Trigonelline	137.048	5.129	0.0012496	9.7052	0.0076062	28M-03M; 28M-12M; 28M-18M
M_0726	L-Aspartic acid β-benzyl ester	245.066	4.828	0.0065706	6.4435	0.025953	28M-18M
M_0739	Ethyl 4-fluoro-3-nitrobenzoate	213.044	1.118	0.0017274	9.003	0.0096439	28M-12M; 28M-18M
M_0740	(9aR,9bS)-9a-Hydroxy-6,9-dimethyl-3-methylene-3,3a,4,5,9a,9b-hexahydroazuleno[4,5-b]furan-2,7-dione	260.102	8.188	0.0051693	6.8659	0.021628	28M-12M; 28M-18M
M_0751	leucoline	129.058	3.501	6.4909e-05	18.013	0.00093019	12M-03M; 18M-03M; 28M-12M; 28M-18M
M_0755	Pro-Leu	228.147	1.478	0.0064243	6.4825	0.025585	12M-03M; 28M-12M
M_0757	4-Aminobenzoic acid	137.048	1.247	0.01298	5.3238	0.043828	28M-03M; 28M-12M; 28M-18M
M_0759	Propofol	178.136	8.948	0.013586	5.2527	0.045285	12M-03M; 18M-03M; 28M-03M
M_0760	Dihydrothymine	128.059	1.102	0.0053128	6.8169	0.022177	18M-03M; 28M-03M
M_0762	Bohemine	340.201	9.13	0.00067488	11.141	0.0049527	28M-03M; 28M-12M; 28M-18M
M_0766	tert-Butyl hydrazodiformate	232.142	1.922	4.2481e-05	19.542	0.00069653	12M-03M; 18M-03M; 28M-03M
M_0768	5-Indolol	133.053	8.521	0.0028726	7.9673	0.014169	28M-03M; 28M-12M; 28M-18M
M_0769	SSR161421	408.155	8.325	0.0098873	5.7578	0.035633	28M-03M; 28M-12M
M_0770	Leu-Leu	244.179	3.947	2.2803e-06	33.301	7.8119e-05	12M-03M; 18M-03M; 28M-03M
M_0771	N4-(2,2-DIMETHYL-1-METHYLCARBAMOYL-PROPYL)-2,N1-DIHYDROXY-3-ISOBUTYL-SUCCINAMIDE	331.211	2.415	0.0021089	8.5872	0.010997	12M-03M; 18M-03M; 28M-03M
M_0784	N-{3-[Acetyl(2-cyanoethyl)amino]propyl}-N-[3-(13-oxoazacyclotridecan-2-yl)propyl]acetamide	448.341	8.441	0.013219	5.2952	0.044554	28M-03M
M_0786	2,3-Dihydroxypropyl 3-sulfanylpropanoate	180.046	1.586	0.0019119	8.7899	0.010314	12M-03M; 18M-03M; 28M-03M
M_0791	BOC-ARG-OH	274.164	1.258	0.0017694	8.9523	0.0097882	12M-03M; 18M-03M; 28M-03M
M_0793	1,2-Dioxin	84.0214	1.131	0.0031639	7.7795	0.015074	28M-03M; 28M-12M; 28M-18M
M_0794	Acetic propanoic anhydride	116.048	1.143	0.0031639	7.7795	0.015074	28M-03M; 28M-12M; 28M-18M
M_0796	fMet	177.046	3.377	0.010001	5.7393	0.035889	28M-03M
M_0798	1-O-palmitoyl-2-O-(5-oxovaleryl)-sn-glycero-3-phosphocholine	593.37	9.976	0.0049804	6.9328	0.021179	12M-03M; 18M-03M; 28M-03M
M_0800	Cafestol	316.203	8.913	0.013287	5.2873	0.044698	28M-12M; 28M-18M
M_0805	(2E)-4,4,4-Trifluoro-2-butenal	124.014	1.885	0.00025662	13.684	0.0024535	12M-03M; 18M-03M; 28M-03M
M_0811	N-Benzoyl-DL-alanine	193.074	6.501	0.00020649	14.309	0.002152	28M-03M; 28M-12M; 28M-18M
M_0814	N-[3-(3,5-Dimethyl-1H-pyrazol-1-yl)-5-ethyl-4H-1,2,4-triazol-4-yl]acetamide	248.139	8.588	0.0028333	7.9943	0.014122	28M-03M; 28M-12M; 28M-18M
M_0821	pyrrolizidine	111.105	0.812	1.0807e-05	25.219	0.00024585	12M-03M; 18M-03M; 28M-03M
M_0825	Tamsulosin	408.167	8.604	0.0011304	9.9298	0.0071432	12M-03M; 18M-03M; 28M-03M
M_0829	1,1-Dimethyl-3-(2H-tetrazol-5-yl)urea	156.076	3.892	0.008769	5.9549	0.032974	28M-12M
M_0831	Nonylthiol	160.129	1.101	0.0053561	6.8024	0.022307	28M-18M
M_0832	Aminomethyl dihydrogen phosphate	127.004	1.071	0.0010576	10.081	0.0068498	12M-03M; 18M-03M; 28M-03M
M_0835	5-(1-Phenyl-1H-tetrazol-5-yl)-1,3,4-oxadiazol-2-amine	229.071	7.159	0.0028554	7.9791	0.014122	18M-12M; 28M-18M
M_0836	2-Benzylthiophene	174.05	1.131	8.418e-05	17.123	0.0011433	28M-03M; 28M-12M; 28M-18M
M_0842	2-(14,15-Epoxyeicosatrienoyl) glycerol	416.254	8.372	0.002982	7.8943	0.014473	28M-12M
M_0843	9-(2-Azido-2,3-dideoxypentofuranosyl)-9H-purin-6-amine	276.108	1.161	0.00032216	13.051	0.0028742	28M-03M; 28M-12M; 28M-18M
M_0845	Osthol	244.11	8.329	2.0983e-06	33.789	7.8119e-05	12M-03M; 18M-03M; 28M-03M; 28M-12M; 28M-18M
M_0849	1-Methyl-4-nitro-1H-imidazole-5-sulfonamide	206.01	2.504	0.0061409	6.561	0.024782	18M-03M; 28M-03M
M_0860	dimethyl-L-arginine	202.143	1.084	0.014975	5.1026	0.048843	28M-12M; 28M-18M
M_0862	Methyl [1-(sulfanylmethyl)cyclopropyl]acetate	160.056	0.598	0.0098217	5.7686	0.035567	12M-03M
M_0864	4-(4-Morpholinyl)-6-(4-morpholinylmethyl)-1,3,5-triazin-2-amine	280.165	8.088	2.7871e-05	21.165	0.00053254	12M-03M; 18M-03M; 28M-03M
M_0866	3,6-Dinitro-1,4-dihydropyrazolo[4,3-c]pyrazole	198.014	1.326	0.0030914	7.8243	0.014845	28M-03M; 28M-12M; 28M-18M
M_0868	Nonyl N-[(allyloxy)carbonyl]-N-methylglycyl-N-methylglycinate	370.249	9.327	0.0050651	6.9025	0.021438	28M-03M; 28M-12M; 28M-18M
M_0872	2-O-Phosphonohexose	260.03	1.404	3.2046e-05	20.616	0.00057781	12M-03M; 18M-03M; 28M-03M; 28M-12M; 28M-18M
M_0874	1,17'-Dihydroxy-10',11a,13',13a-tetramethyl-2,3,3a,3b,4,4',5,5',5a,6,6',7',8',9,9',10,10',11,11',11a,11b,12,12',13,13',13a,14',15',16',17'-triacontahydro-1H-spiro[cyclopenta[5,6]naphtho[1,2-g]chromene -8,2'-cyclopenta[a]phenanthren]-3'(1'H)-one	604.45	9.093	0.00019106	14.538	0.0020645	28M-03M; 28M-12M; 28M-18M
M_0875	Eicosapentaenoic acid	302.226	9.09	0.00013914	15.5	0.001677	28M-03M; 28M-12M; 28M-18M
M_0876	2-Amino-9-(2-deoxypentofuranosyl)-7,9-dihydro-3H-purine-6,8-dione	283.092	2.269	1.0456e-08	82.243	1.4211e-06	12M-03M; 18M-03M; 28M-03M; 28M-12M; 28M-18M
M_0878	Rabenzazole	212.105	7.806	3.27e-05	20.537	0.00057781	12M-03M; 18M-03M; 28M-12M; 28M-18M
M_0885	N6,N6,N6-Trimethyl-L-lysine	188.152	1.293	0.0014984	9.3072	0.0087777	12M-03M; 18M-03M; 28M-03M
M_0890	Temozolomide	194.056	7.418	3.2039e-05	20.617	0.00057781	28M-03M; 28M-12M; 28M-18M
M_0900	N4-(2,2-DIMETHYL-1-METHYLCARBAMOYL-PROPYL)-2,N1-DIHYDROXY-3-ISOBUTYL-SUCCINAMIDE	331.211	3.544	3.0896e-05	20.758	0.00057378	12M-03M; 18M-03M; 28M-03M
M_0901	Indoline	119.074	7.174	0.0031834	7.7676	0.015101	28M-03M; 28M-12M; 28M-18M
M_0907	4-Morpholinylacetic acid	145.074	2.256	0.0021889	8.5109	0.01135	28M-03M; 28M-12M; 28M-18M
M_0911	AMOZ	201.111	1.236	0.0018741	8.8316	0.010212	28M-03M; 28M-12M; 28M-18M
M_0920	2-Oxo-4-pentenoate	113.025	1.065	0.001221	9.7568	0.007533	12M-03M; 28M-12M
M_0924	Glycerol (1-(12-Hydroxystearate))	374.304	9.067	0.0011032	9.9848	0.0070782	12M-03M; 18M-03M; 28M-03M
M_0928	D-Serine	105.043	1.259	0.011263	5.5478	0.039046	28M-03M; 28M-12M
M_0932	Thymine	126.043	2.903	0.0091173	5.8905	0.033795	28M-03M; 28M-18M
M_0933	3,4-Dihydroxyphenylglycol O-sulfate	250.015	7.123	0.0081157	6.0839	0.031096	28M-03M; 28M-12M; 28M-18M
M_0936	3-Methoxy-5-(methylsulfonyl)-4-isothiazolecarbonitrile	217.982	1.179	0.00078258	10.783	0.0055636	12M-03M; 28M-12M; 28M-18M
M_0945	Olomoucine	298.154	8.611	1.6934e-06	35.079	6.5575e-05	12M-03M; 18M-03M; 28M-03M; 28M-12M; 28M-18M
M_0947	Butyl O-phosphonoserinate	241.071	1.305	0.010874	5.6042	0.038058	28M-03M
M_0950	Eicosatetraynoic acid	296.177	8.39	1.3258e-10	165.48	2.681e-08	28M-03M; 28M-12M; 28M-18M
M_0952	3H-1,2,4-Triazol-3-one	83.012	1.197	0.011323	5.5394	0.039177	28M-03M
M_0954	Z-ORN-OH	266.127	2.636	3.7685e-06	30.477	0.00011431	12M-03M; 18M-03M; 28M-03M
M_0961	PTA	157.077	3.549	0.0043609	7.1747	0.019146	12M-03M; 18M-03M; 28M-03M
M_0964	4-Morpholinylacetic acid	145.074	1.244	0.00026965	13.544	0.0025297	18M-03M; 28M-03M; 18M-12M; 28M-12M
M_0966	(+)-Alantolactone	232.146	8.575	0.0050333	6.9138	0.021353	12M-03M; 28M-03M; 28M-18M
M_0969	ACETYL PROLINE	157.074	3.254	0.0080069	6.1065	0.030744	28M-03M; 28M-18M
M_0970	phenacetin	179.095	2.669	3.5556e-05	20.215	0.00060478	12M-03M; 18M-03M; 28M-03M; 28M-12M; 28M-18M
M_0984	3-Acetyl-4-thiazolidinecarboxylic acid	175.03	6.038	0.0020341	8.6614	0.010731	12M-03M
M_0994	Thiamine	264.104	0.813	3.7361e-06	30.524	0.00011431	12M-03M; 18M-03M; 28M-03M; 28M-12M; 28M-18M
M_0998	17α-Methyl-androstan-3-hydroxyimine-17β-ol	319.249	9.153	0.003648	7.5076	0.016808	12M-03M; 18M-12M; 28M-12M
M_1000	Hydroxyacetylaminofluorene	239.095	2.706	4.5796e-05	19.264	0.00073113	28M-03M; 28M-12M; 28M-18M
M_1003	Tetrafluoro(selenoxo)molybdenum	253.816	1.354	0.00068732	11.096	0.0050037	28M-03M; 28M-12M; 28M-18M
M_1007	4,5-Difluoro-1,2-benzenediol	146.018	0.787	0.00020958	14.266	0.0021673	12M-03M; 18M-03M; 28M-12M; 28M-18M
M_1008	1-(4,6-Diaminopyrimidin-5-yl)guanidine	167.092	1.219	3.5766e-06	30.761	0.0001142	28M-03M; 28M-12M; 28M-18M
M_1010	hexahydropyridazine-3-phosphonic acid	166.051	0.793	9.8703e-05	16.595	0.0012651	12M-03M; 18M-03M; 28M-12M; 28M-18M
M_1011	all-cis-4,7,10,13,16-Docosapentaenoic acid	330.256	9.328	0.011432	5.5241	0.03948	28M-03M; 28M-12M
M_1019	Olomoucine	298.154	8.801	0.0004584	12.113	0.003729	12M-03M; 18M-03M; 28M-03M; 28M-12M
M_1020	4-Methyl-2,6,7-trioxa-1-phosphabicyclo[2.2.2]octane 1-sulfide	180.001	1.213	1.7299e-07	51.782	1.1661e-05	12M-03M; 18M-03M; 28M-03M; 28M-18M
M_1023	Vorinostat	264.147	3.515	7.3624e-07	40.511	3.4358e-05	12M-03M; 18M-03M; 28M-03M
M_1032	Eugenol	164.084	7.812	0.0039814	7.3433	0.01776	28M-03M; 28M-12M; 28M-18M
M_1040	2-(2-(2-(2-(4-nonylphenoxy)ethoxy)ethoxy)ethoxy)ethanol	396.286	9.062	0.0029507	7.9149	0.014359	12M-03M; 18M-03M; 28M-03M
M_1042	1,11-Diamino-3,6,9-trioxaundecane	192.147	1.131	1.6584e-05	23.313	0.00034693	28M-03M; 28M-12M; 28M-18M
M_1043	MFCD03701570	178.044	0.789	0.00037399	12.648	0.0031512	12M-03M; 18M-03M; 28M-12M; 28M-18M
M_1049	MFCD01656717	241.993	7.769	0.0035072	7.5821	0.016242	28M-12M; 28M-18M
M_1053	MFCD00266981	289.074	8.41	0.013716	5.2379	0.045553	28M-03M; 28M-12M
M_1054	Hexyl N-(methoxycarbonyl)methioninate	291.15	8.277	8.8993e-06	26.126	0.00022187	28M-03M; 28M-12M; 28M-18M
M_1055	D-Sphingosine	299.282	7.998	0.001986	8.7109	0.010575	28M-03M
M_1059	DO0750000	236.178	9.096	0.0023127	8.399	0.011823	28M-03M; 28M-12M; 28M-18M
M_1064	Heptyl (9Z)-12-hydroxy-9-octadecenoate	396.361	10.376	0.0020859	8.6097	0.010909	18M-03M; 28M-03M
M_1068	Docosahexaenoic acid	328.24	9.198	0.0071185	6.3058	0.027802	28M-03M; 28M-12M; 28M-18M
M_1069	Trigonelline	137.048	1.591	0.013318	5.2836	0.044722	28M-03M
M_1070	L-Alanyl-L-glutamine	217.106	1.572	0.0060514	6.5867	0.024606	28M-03M; 28M-12M; 28M-18M
M_1078	4-Nitro-2,1,3-benzoxadiazole	165.018	0.795	0.00014445	15.384	0.0017069	12M-03M; 18M-03M; 28M-12M; 28M-18M
M_1080	(13E)-1,11,16-Trihydroxy-16-methylprost-13-en-9-one	354.277	9.045	0.0049787	6.9335	0.021179	12M-03M; 18M-03M; 28M-03M
M_1081	4-Acetamidobenzoic acid	179.058	6.337	0.0015503	9.2338	0.0089571	28M-12M; 28M-18M
M_1083	DL-Histidine	155.07	1.103	0.0054121	6.7839	0.022488	28M-03M; 28M-12M
M_1085	Dihydroxyphenylglycine	183.053	4.926	4.5791e-08	64.584	4.6153e-06	12M-03M; 18M-03M; 28M-03M; 28M-12M; 28M-18M
M_1087	Propyl dibutylcarbamodithioate	247.142	1.136	0.0097853	5.7747	0.035567	12M-03M; 28M-03M
M_1088	Dimethyl N-octanoylglutamate	301.189	3.684	0.0010128	10.18	0.0067031	28M-03M; 28M-12M; 28M-18M
M_1092	MFCD00055819	175.059	1.307	0.0011963	9.8024	0.0074058	12M-03M; 18M-03M; 28M-03M
M_1094	2,3-Dihydroxypropyl 3-sulfanylpropanoate	180.046	1.633	0.00083656	10.625	0.0058112	28M-03M; 28M-12M
M_1097	3-Oxoestra-4,9,11-trien-17-yl acetate	312.173	8.363	5.7874e-07	42.214	3.1918e-05	28M-03M; 28M-12M; 28M-18M
M_1101	Nicotinamide	122.048	1.808	3.0105e-07	47.172	1.8263e-05	12M-03M; 18M-03M; 28M-03M; 28M-12M; 28M-18M
M_1102	methyprylon	183.126	7.884	0.00034914	12.833	0.003055	12M-03M; 28M-12M; 28M-18M
M_1104	tert-Butyl 3-[(methylsulfonyl)oxy]-1-piperidinecarboxylate	279.114	6.877	8.652e-08	58.129	6.2986e-06	28M-03M; 28M-12M; 28M-18M
M_1113	MFCD00674100	165.054	0.793	0.00064559	11.249	0.0048553	12M-03M; 18M-03M
M_1118	Gly-Leu	188.116	1.193	0.0008075	10.709	0.0056963	28M-03M; 28M-12M; 28M-18M
M_1123	Gly-Lys	203.127	1.307	0.0011045	9.9821	0.0070782	28M-03M; 28M-12M; 28M-18M
M_1124	NPPB	300.111	7.757	1.7543e-05	23.072	0.00036282	18M-03M; 28M-03M; 28M-12M; 28M-18M
M_1125	7-Methylguanosine	297.107	2.741	5.7376e-05	18.448	0.00085594	28M-03M; 28M-12M; 28M-18M
M_1128	N-Acetylanthranilic acid	179.058	7.711	4.0343e-05	19.736	0.00067362	12M-03M; 18M-03M; 28M-03M; 28M-12M; 28M-18M
M_1143	18-acetoxy-1alpha,25-dihydroxyvitamin D3	474.335	8.719	3.3538e-05	20.439	0.00058133	28M-03M; 28M-12M; 28M-18M
M_1144	(+/-)12-HpETE	318.219	8.89	0.00017335	14.828	0.0019475	28M-03M; 28M-12M; 28M-18M
M_1146	Linoleyl alcohol	266.261	10.467	0.012059	5.4394	0.040947	18M-03M; 28M-03M
M_1147	1-stearoyl-sn-glycero-3-phosphoethanolamine	481.317	9.843	0.004801	6.9991	0.020754	28M-12M
M_1149	Avocadyne 1-acetate	316.204	8.25	0.0028419	7.9884	0.014122	28M-03M; 28M-18M
M_1150	Xanthurenic acid	205.037	5.034	0.0015894	9.1803	0.0090681	28M-03M; 28M-12M; 28M-18M
M_1151	CAPROYL SARCOSINE	243.183	7.563	0.010336	5.6859	0.036597	28M-03M
M_1152	Valerophenone	162.105	8.232	0.0017067	9.0285	0.0095575	28M-12M; 28M-18M
M_1153	1-(tert-Butylamino)-3-((5,6,7,8-tetrahydro-cis-6,7-dihydroxy-1-naphthyl)oxy)-2-propanol	309.194	7.096	1.1344e-15	1019.5	2.0647e-12	28M-03M; 28M-12M; 28M-18M
M_1158	2-Indolylformic acid	161.048	6.495	0.00039491	12.504	0.0032769	28M-03M; 28M-12M; 28M-18M
M_1159	Palmitoyl ethanolamide	299.282	9.686	0.00082173	10.667	0.0057743	18M-03M; 28M-03M; 28M-12M
M_1162	tranexamic acid	157.11	3.794	0.00025495	13.702	0.0024535	12M-03M; 18M-03M; 28M-03M
M_1165	Rosoxacin	294.101	3.807	2.1175e-07	50.054	1.3764e-05	12M-03M; 18M-03M; 28M-03M
M_1166	Diethylene glycol	106.063	7.54	0.00066277	11.185	0.0048836	28M-03M; 28M-12M; 28M-18M
M_1167	Propylparaben	180.079	7.792	0.00012191	15.915	0.0015301	12M-03M; 18M-03M; 28M-12M; 28M-18M
M_1171	procodazole	190.074	1.191	0.0019094	8.7927	0.010314	12M-03M; 18M-03M; 28M-03M
M_1172	3,4,5-Trifluorobenzonitrile	157.014	1.078	0.00020347	14.352	0.0021424	12M-03M; 18M-03M; 28M-03M
M_1173	Homocitric acid	206.043	0.96	0.0019871	8.7098	0.010575	12M-03M; 18M-03M; 28M-03M
M_1175	Tetrahydroisoquinoline-3-carboxylic acid	177.079	7.311	8.2801e-05	17.178	0.0011331	12M-03M; 18M-03M; 28M-03M; 28M-12M
M_1179	2-(Amidinoamidino)Hydrazide Isonicotinic Acid	221.103	7.974	9.8384e-07	38.541	4.0883e-05	28M-03M; 28M-12M; 28M-18M
M_1180	Hypotaurine	109.02	1.122	0.011145	5.5647	0.03871	28M-03M; 28M-12M; 28M-18M
M_1190	α-Aspartylphenylalanine	280.106	4.337	0.0038164	7.4226	0.017321	28M-03M; 28M-12M; 28M-18M
M_1191	1,4-Dinitrotetrahydroimidazo[4,5-d]imidazole-2,5(1H,3H)-dione	232.019	1.401	0.012168	5.4253	0.041238	28M-12M; 28M-18M
M_1195	2-O-{(2E)-3-[4-(beta-D-Glucopyranosyloxy)-3-methoxyphenyl]-2-propenoyl}-1-O-[(3beta,5xi,9xi,16alpha)-3-(beta-D-glucopyranuronosyloxy)-16-hydroxy-28-oxoolean-12-en-28-yl]-alpha-L-arabinopyranose	1118.53	4.014	0.0019154	8.7861	0.010314	12M-03M; 18M-03M; 28M-03M
M_1197	3,4-Diethoxyphenylacetic acid	224.104	7.764	4.8182e-08	64.044	4.6153e-06	12M-03M; 18M-03M; 28M-03M; 28M-12M; 28M-18M
M_1205	2,5-Dioxo-2,5-dihydro-1H-pyrrole-3,4-dicarbonitrile	147.007	0.789	0.00014537	15.364	0.0017069	12M-03M; 18M-03M; 28M-12M; 28M-18M
M_1206	MFCD00091818	179.033	0.791	0.00010008	16.55	0.0012737	12M-03M; 18M-03M; 28M-18M
M_1208	(+/-)-cis-3-Methyl thiofentanyl	356.196	8.967	0.0081553	6.0757	0.031182	28M-12M; 28M-18M
M_1209	N~6~-Cycloheptyl-N~2~-phenyl-7H-purine-2,6-diamine	322.191	9.207	0.010789	5.6167	0.037835	18M-03M
M_1210	Nitrosoiminodiacetic acid	162.027	4.198	0.0020817	8.6138	0.010909	28M-12M; 28M-18M
M_1214	PTA	157.077	3.425	0.00063837	11.277	0.0048209	12M-03M; 18M-03M; 28M-03M
M_1218	Gly-Lys	203.127	1.418	3.3218e-05	20.476	0.00058132	12M-03M; 28M-03M; 28M-12M; 28M-18M
M_1226	(2-PHENYL-1,3-THIAZOL-4-YL)METHANOL	191.04	4.026	2.2505e-06	33.377	7.8119e-05	12M-03M; 18M-03M; 18M-12M; 28M-12M; 28M-18M
M_1229	Benzoxazole	119.037	7.711	0.00030422	13.209	0.0027547	12M-03M; 28M-03M; 28M-18M
M_1230	Tanaproget	297.094	1.161	0.0016633	9.0833	0.0093721	12M-03M; 18M-03M; 28M-03M
M_1231	1,3-Adamantanediacetic acid	252.135	8.766	0.0033098	7.6927	0.015525	12M-03M; 18M-03M
M_1233	Dimethyl N-octanoylglutamate	301.189	3.895	0.0007418	10.911	0.00531	28M-03M; 28M-12M; 28M-18M
M_1236	5,8-Dimethoxy-6-[4-diethylamino-1-methylbutylamino]quinazoline	346.235	8.257	0.0011275	9.9355	0.0071432	28M-03M; 28M-12M; 28M-18M
M_1237	dihydroxyphenylalanine	197.069	6.694	1.1444e-06	37.548	4.6284e-05	12M-03M; 18M-03M; 28M-03M
M_1240	6-Methylnicotinamide	136.061	1.017	0.0022623	8.4438	0.011664	28M-12M; 28M-18M
M_1241	2207	172.11	7.764	0.00018978	14.558	0.0020645	28M-03M; 28M-12M; 28M-18M
M_1245	4-[(6-Hydroxyhexyl)oxy]benzoic acid	238.12	7.808	0.0039153	7.3747	0.017594	12M-03M; 18M-03M; 28M-12M
M_1247	Ethyl L-methioninate	177.082	3.157	0.0011189	9.9528	0.0071205	12M-03M; 28M-12M; 28M-18M
M_1248	1-[7-(1-Hydroxyethyl)-1-benzofuran-2-yl]-2-[(2-methyl-2-propanyl)amino]ethanol	277.168	7.84	0.0088712	5.9357	0.03329	12M-03M; 18M-03M; 28M-03M
M_1249	N-hydroxyhexahomomethionine	249.14	7.47	2.2986e-06	33.254	7.8119e-05	28M-03M; 28M-12M; 28M-18M
M_1251	L-Threonyl-L-seryl-L-lysine	334.185	0.799	0.011474	5.5183	0.03955	12M-03M; 18M-03M
M_1256	2361	170.131	7.954	0.0009949	10.221	0.0066326	12M-03M; 28M-03M; 18M-12M
M_1260	2,3-Dideoxy-3-nitropentarate	191.007	1.071	0.0046862	7.0431	0.020355	12M-03M; 18M-03M; 28M-03M
M_1264	p-Hexyloxybenzoic Acid	222.126	7.787	0.00016712	14.938	0.0019229	12M-03M; 18M-03M; 28M-12M; 28M-18M
M_1265	1-Benzenesulfinylpiperidine	209.088	2.163	2.9495e-05	20.941	0.00055342	28M-03M; 28M-12M; 28M-18M
M_1266	1,4-Dimethyl-N-nitro-1,4-dihydro-5H-tetrazol-5-imine	158.055	1.21	0.001528	9.265	0.0088846	28M-03M; 28M-12M
M_1267	3,5-Diamino-N-carbamimidoyl-2-pyrazinecarboxamide	195.087	6.431	0.010995	5.5864	0.038407	28M-12M; 28M-18M
M_1269	1-(4,6-Dimethyl-2-pyrimidinyl)-3-[3-(2-oxo-1-pyrrolidinyl)propyl]guanidine	290.186	8.872	0.0062054	6.5428	0.024931	28M-03M
M_1271	aldehydo-D-glucosamine 6-phosphate	259.046	1.184	0.0012952	9.6259	0.0077539	12M-03M; 18M-03M; 28M-03M
M_1273	Gallic acid	170.022	2.214	8.7397e-05	16.997	0.0011696	28M-03M; 28M-12M; 28M-18M
M_1275	aloin A	418.127	7.704	1.0734e-13	503.96	9.7677e-11	28M-03M; 28M-12M; 28M-18M
M_1277	N~2~,N~6~-Dioctanoyl-L-lysine	398.315	9.278	0.01345	5.2683	0.04508	18M-03M
M_1278	Pentahydroxyphosphorane	115.988	1.413	0.0095652	5.8118	0.035027	18M-03M; 28M-03M
M_1281	Piperonylonitrile	147.032	7.458	0.00070274	11.042	0.0050956	12M-03M; 18M-03M; 28M-03M
M_1283	1957290	254.151	8.622	0.012368	5.3995	0.04184	28M-03M; 28M-12M
M_1284	2,2,2-Trifluoroethyl	83.0109	1.193	0.003012	7.8748	0.014579	18M-03M; 28M-03M
M_1286	6-(1-Azepanyl)-N-(2,3-dimethylphenyl)[1,2,5]oxadiazolo[3,4-b]pyrazin-5-amine	338.186	8.842	0.00037272	12.658	0.0031512	28M-03M; 28M-12M; 28M-18M
M_1288	gamma-Aminobutyric acid	103.064	1.195	0.00045515	12.132	0.003729	28M-03M; 28M-12M; 28M-18M
M_1294	Gly-Lys	203.127	1.446	0.0001849	14.635	0.0020395	12M-03M; 18M-03M; 28M-03M; 28M-12M; 28M-18M
M_1295	N-methylethanolamine phosphate	155.035	1.6	0.013585	5.2528	0.045285	18M-03M; 28M-03M
M_1299	Homocitrulline	189.111	1.119	0.0022855	8.423	0.011717	18M-03M; 28M-03M; 18M-12M; 28M-12M
M_1300	2,2'-Thenil	221.981	1.077	0.0013478	9.538	0.0079903	12M-03M; 18M-03M; 28M-03M
M_1301	4-[(6-Hydroxyhexyl)oxy]benzoic acid	238.12	7.709	0.00078639	10.772	0.005569	12M-03M; 18M-03M; 28M-12M; 28M-18M
M_1302	Propylparaben	180.079	7.827	0.010313	5.6894	0.036588	18M-03M; 28M-18M
M_1303	BOC-L-PHENYLALANINOL	251.152	8.518	2.809e-05	21.134	0.00053254	28M-03M; 28M-12M; 28M-18M
M_1310	(4S)-4-Cyclohexyl-L-proline	197.142	7.889	0.00015897	15.09	0.0018428	12M-03M; 28M-12M; 28M-18M
M_1313	OB4520000	159.068	7.263	0.00055922	11.606	0.0042945	28M-12M; 28M-18M
M_1314	L-(+)-Leucine	131.095	1.095	0.00065888	11.199	0.0048836	28M-03M; 28M-12M; 28M-18M
M_1319	Loratadine impurity H	171.09	3.644	1.6817e-06	35.121	6.5575e-05	12M-03M; 28M-03M; 28M-12M; 28M-18M
M_1320	[(Dicyclohexylamino)sulfanyl](dimethylamino)methanethione	300.17	8.783	0.004855	6.9789	0.020874	12M-03M; 18M-03M
M_1324	[4-(Phenylsulfanyl)phenyl]methanol	216.061	1.127	0.00014508	15.37	0.0017069	28M-03M; 28M-12M; 28M-18M
M_1328	(1-Oxido-2,6,7-trioxa-1-phosphabicyclo[2.2.2]oct-4-yl)methanol	180.019	1.845	1.2395e-05	24.595	0.00027851	12M-03M; 18M-03M; 28M-03M; 28M-18M
M_1329	tioxolone	167.988	0.837	0.0025424	8.2087	0.012871	12M-03M; 18M-03M; 28M-18M
M_1331	Asarone	208.11	7.737	0.00083215	10.637	0.0058027	12M-03M; 18M-03M; 28M-12M; 28M-18M
M_1346	1-Butyl-4-isothiocyanatobenzene	191.077	2.42	0.010297	5.6919	0.036588	28M-03M; 28M-18M
M_1347	Demethylphosphinothricin	167.035	7.392	8.1042e-06	26.572	0.00021376	18M-03M; 28M-03M; 18M-12M; 28M-12M; 28M-18M
M_1349	C8-HSL	227.152	8.507	0.00098952	10.233	0.006621	28M-03M; 28M-12M; 28M-18M
M_1350	C7-HSL	213.137	7.931	0.00028519	13.388	0.0026482	28M-03M; 28M-12M; 28M-18M
M_1353	Methohexital	262.132	5.21	0.0048631	6.9759	0.020874	12M-03M; 18M-03M
M_1363	D-Erythritol 4-phosphate	202.024	1.196	0.0037572	7.4519	0.017138	12M-03M; 18M-03M
M_1368	2-Amino-6-propoxybenzothiazole	208.067	4.024	2.3178e-06	33.205	7.8119e-05	12M-03M; 18M-03M; 28M-12M; 28M-18M
M_1369	Glufosinate	181.051	7.887	0.00049024	11.94	0.0039133	12M-03M; 18M-03M; 28M-03M; 28M-12M
M_1373	6-(1-Azepanyl)-N-(2,3-dimethylphenyl)[1,2,5]oxadiazolo[3,4-b]pyrazin-5-amine	338.186	8.933	0.00036356	12.724	0.0031211	28M-03M; 28M-12M; 28M-18M
M_1377	N-Dodecanoyl-L-serine	287.21	7.123	0.0098477	5.7643	0.035567	28M-03M; 28M-18M
M_1379	3,6-Difluoro-2-methoxyphenol	160.033	1.175	0.0012492	9.7059	0.0076062	28M-03M; 28M-12M; 28M-18M
M_1385	1-(4,6-Diaminopyrimidin-5-yl)guanidine	167.093	0.798	0.0058117	6.6577	0.024039	12M-03M; 18M-03M; 28M-03M
M_1388	3-Nitro-1H-1,2,4-triazole-1,5-diamine	144.04	1.142	5.8554e-05	18.375	0.00086641	28M-03M; 28M-12M; 28M-18M
M_1391	2,2'-Bipyridine	156.069	3.518	0.0058394	6.6494	0.024099	12M-03M; 18M-03M; 28M-03M
M_1394	Leu-Leu	244.179	3.574	5.7373e-08	62.224	4.7463e-06	12M-03M; 18M-03M; 28M-03M
M_1397	Isothiazole-4-carbonitrile, 5-ethylsulfanyl-3-methoxy-	200.009	1.148	7.5464e-06	26.917	0.00020198	12M-03M; 18M-03M; 28M-03M
M_1398	Safingol	301.298	8.046	0.00045895	12.11	0.003729	12M-03M; 18M-03M; 28M-03M
M_1400	2,1,3-Benzoxadiazole-5-carbonitrile 3-oxide	161.023	0.789	4.4467e-05	19.373	0.00071619	12M-03M; 18M-03M; 28M-03M; 28M-18M
M_1408	2,2'-Methylenebis(4,6-bis(1,1-dimethylpropyl)phenol)	480.395	10.45	0.0016829	9.0584	0.0094531	18M-03M; 28M-03M
M_1413	3,4-Diethoxyphenylacetic acid	224.105	7.799	6.4752e-05	18.021	0.00093019	12M-03M; 18M-03M; 28M-12M; 28M-18M
M_1414	DO0750000	236.178	9.192	0.0018236	8.8888	0.0099968	12M-03M; 28M-03M
M_1419	4149853	371.303	9.645	0.0069114	6.3563	0.02711	12M-03M; 18M-03M
M_1423	2616	225.136	6.58	0.0051014	6.8896	0.02148	28M-03M
M_1430	2,2'-(1H-1,2,4-Triazole-3,5-diyl)dipyrazine	225.077	1.859	0.00037179	12.664	0.0031512	12M-03M; 28M-03M; 28M-18M
M_1433	2,7-Dimethoxynaphthalene	188.084	8.141	0.004345	7.1814	0.019146	28M-03M; 28M-12M
M_1434	N-1H-Tetrazol-5-Yl-Guanidine	127.061	0.952	0.0041159	7.2816	0.018271	12M-03M; 18M-03M; 28M-03M
M_1435	L-Histidine	155.07	1.4	0.002916	7.938	0.014239	18M-03M; 28M-18M
M_1436	[(2R,3R,4R,5S,6R)-3-acetamido-5-[(2S,3R,4R,5S,6R)-3-acetamido-4-hydroxy-6-(hydroxymethyl)-5-[[(2R)-2-hydroxy-3-[oxido-[(2S,3R,4R)-2,3,4,5-tetrahydroxypentoxy]phosphoryl]oxy-propoxy]-oxido-phosphoryl]oxy-tetrahydropyran-2-yl]oxy-4-hydroxy-6-(hydroxymethyl)tetrahydropyran-2-yl] [oxido-[(2Z,6Z,10Z,14Z,18Z,22Z,26Z,30Z,34E,38E)-3,7,11,15,19,23,27,31,35,39,43-undecamethyltetratetraconta-2,6,10,14,18,22…	1696.78	4.617	0.00017239	14.844	0.0019475	12M-03M; 18M-03M; 28M-12M
M_1443	hodgkinsine	518.318	10.75	0.011521	5.5118	0.039636	12M-03M; 18M-03M
M_1447	Octahydro-1,2,8-indolizinetriol	173.105	6.433	0.0028509	7.9822	0.014122	28M-12M; 28M-18M
M_1448	val-val-ile-ala	400.269	6.502	0.0011651	9.8616	0.0072629	12M-03M; 18M-03M; 28M-03M
M_1450	(Dimethylamino)methyl dimethylcarbamodithioate	178.061	3.864	5.1384e-06	28.84	0.00015331	12M-03M; 18M-03M; 28M-12M; 28M-18M
M_1457	Norharman	168.069	4.009	6.3592e-07	41.54	3.2149e-05	12M-03M; 18M-03M; 28M-03M; 28M-12M; 28M-18M
M_1466	MFCD00041564	202.157	8.797	0.0038377	7.4121	0.01735	28M-03M; 28M-12M; 28M-18M
M_1471	1422990	173.142	1.207	8.6417e-06	26.265	0.00021844	12M-03M; 18M-03M; 28M-03M
M_1477	Indole-3-lactic acid	205.074	5.127	2.3265e-05	21.893	0.00046024	12M-03M; 18M-03M; 28M-03M; 28M-18M
M_1479	Z-Asn-Oh	266.09	5.158	0.0014897	9.3198	0.0087744	28M-03M; 28M-12M; 28M-18M
M_1480	Nicotinuric acid	180.054	4.603	0.0045508	7.0966	0.019814	28M-12M; 28M-18M
M_1487	methylthiomethyllithium	68.027	1.152	0.001155	9.8813	0.0072485	28M-03M; 28M-12M; 28M-18M
M_1488	DPTH	268.067	1.219	0.0010403	10.118	0.006786	28M-03M; 28M-12M
M_1492	Bis[(2-isopropyl-5-methylcyclohexyl)oxy](2-methoxyphenyl)phenylsilane	522.352	10.333	0.00046792	12.06	0.003785	28M-03M; 28M-12M; 28M-18M
M_1493	GX1529000	113.121	8.125	0.0062471	6.5311	0.025043	28M-03M; 28M-12M; 28M-18M
M_1499	2,4-Bis(dimethylamino)-6-nitro-1,3,5-triazine	212.103	7.55	0.015185	5.0814	0.049263	28M-18M
M_1500	1-[(Boc)amino] cyclopanecarboxylic acid	201.1	3.316	9.6844e-06	25.728	0.00023214	12M-03M; 18M-03M; 28M-03M; 28M-12M; 28M-18M
M_1501	3-Phenylpyrazole-4-carbaldehyde	172.064	2.005	0.010676	5.6336	0.037657	28M-03M
M_1504	4-Aminopyrazolo[5,1-c][1,2,4]triazine-3-carbohydrazide	193.072	3.66	2.5815e-07	48.412	1.6201e-05	12M-03M; 28M-03M; 28M-12M; 28M-18M
M_1510	N.pi.-Methyl-L-histidine	169.085	1.396	3.2559e-05	20.554	0.00057781	12M-03M; 18M-03M; 28M-12M; 28M-18M
M_1517	3420	190.136	8.568	0.013862	5.2215	0.045872	18M-03M
M_1519	5-Indolol	133.053	8.33	0.0076854	6.1756	0.029761	28M-03M; 28M-12M
M_1520	3-(5,6-Dimethoxy-2-methyl-1,3-benzothiazol-3-ium-3-yl)-1-propanesulfonate	331.054	5.012	0.0037998	7.4307	0.017289	28M-03M; 28M-12M; 28M-18M
M_1526	leu-leu-asp	359.206	5.909	3.5777e-07	45.814	2.1004e-05	12M-03M; 18M-03M; 28M-03M
M_1528	Gly-Lys	203.126	1.527	0.000737	10.927	0.0053017	28M-03M; 28M-12M; 28M-18M
M_1529	3-Amino-3-[4-amino-6-(dimethylamino)-1,3,5-triazin-2-yl]-1-propanol	212.139	7.343	0.0017449	8.9817	0.0097115	28M-03M; 28M-12M
M_1530	2-(Dibutylamino)ethanethiol	189.156	0.863	0.00039611	12.496	0.0032769	12M-03M; 18M-03M; 28M-03M
M_1531	trans-3-Indoleacrylic acid	187.063	7.244	0.0015591	9.2216	0.0089798	12M-03M; 18M-03M; 28M-12M; 28M-18M
M_1534	5-Methyl-1H-pyrrole-2-carboxylate	124.041	0.793	0.00035387	12.797	0.0030815	12M-03M; 18M-03M; 28M-18M
M_1542	CU5250000	131.037	6.538	0.011047	5.5788	0.038444	12M-03M; 28M-03M
M_1544	Valyllysine	245.174	0.834	0.0010023	10.204	0.0066575	12M-03M; 18M-03M; 28M-03M
M_1548	Phenylphosphanide	109.021	1.107	0.0049478	6.9447	0.021138	12M-03M; 18M-03M
M_1551	methylthiomethyllithium	68.027	0.975	0.00092442	10.391	0.0062777	12M-03M; 18M-03M; 28M-03M
M_1563	N-Benzoyl-DL-alanine	193.074	8.268	0.00018045	14.708	0.0020026	12M-03M; 28M-03M; 28M-18M
M_1566	Benzoic acid	122.037	6.062	0.0010515	10.094	0.0068347	18M-03M; 28M-03M
M_1568	6-Amino-1-ethyl-3-propyl-2,4(1H,3H)-pyrimidinedione	197.116	1.453	0.0084761	6.0113	0.032183	28M-03M
M_1569	N-(2,1,3-Benzothiadiazol-4-yl)-2-thiophenecarboxamide	261.002	1.215	0.010017	5.7366	0.035889	12M-03M; 18M-03M
M_1571	3854	120.061	0.906	0.00028782	13.362	0.0026505	12M-03M; 18M-03M; 28M-03M
M_1572	Crocetin	328.167	8.424	6.7668e-08	60.548	5.3546e-06	28M-03M; 28M-12M; 28M-18M
M_1573	argininamide	173.128	0.812	0.00104	10.119	0.006786	12M-03M; 18M-03M; 28M-03M
M_1574	Aniracetam	219.09	7.494	9.8968e-06	25.626	0.00023214	12M-03M; 18M-03M; 28M-03M
M_1576	terpendole E	437.291	9.685	0.002024	8.6717	0.010708	28M-03M; 28M-12M; 28M-18M
M_1578	Hypusine	233.174	0.792	1.0955e-08	81.623	1.4211e-06	12M-03M; 18M-03M; 28M-03M
M_1580	Guanine	151.049	2.252	0.0064439	6.4772	0.025607	28M-03M; 28M-12M; 28M-18M
M_1584	Gly-Lys	203.127	1.399	0.00072289	10.974	0.0052209	28M-03M; 28M-12M; 28M-18M
M_1588	(+)-Nootkatone	218.167	9.326	0.009962	5.7456	0.035832	12M-03M; 18M-03M; 28M-03M
M_1589	1H-Imidazole-4,5-dicarbohydrazide	184.071	3.118	0.0013392	9.5521	0.0079653	12M-03M; 18M-03M; 28M-03M
M_1594	6-aminohexyl phosphate	197.082	1.237	0.0043583	7.1759	0.019146	12M-03M; 18M-03M
M_1600	4-{[5-({4-[(5-Aminopentyl)(hydroxy)amino]-4-oxobutanoyl}amino)pentyl](hydroxy)amino}-4-oxobutanoic acid	418.243	2.296	0.00038826	12.549	0.0032414	12M-03M; 18M-03M; 28M-03M
M_1602	Timonacic	133.02	6.043	0.0030298	7.8633	0.014594	12M-03M; 28M-03M
M_1607	1H-Imidazole-4-carboxamide, 5- (3-butyl-3-methyl-1-triazenyl)-	224.139	8.795	0.0065738	6.4426	0.025953	28M-03M; 28M-12M; 28M-18M
M_1610	4-(2,3-dihydroindol-1-yl)-N-[3-(N-ethyl-3-methylanilino)propyl]-3-(1-imidazolyl)-4-oxobutanamide	459.263	8.537	0.00091488	10.415	0.0062363	28M-03M; 28M-12M; 28M-18M
M_1611	tranexamic acid	157.11	1.151	0.00012354	15.872	0.0015401	28M-03M; 28M-12M; 28M-18M
M_1616	(±)-Equol	242.094	7.697	8.2469e-13	367.02	5.0031e-10	28M-03M; 28M-12M; 28M-18M
M_1617	Glycylglycyl-L-valine	231.122	2.42	0.013653	5.245	0.045427	28M-03M; 28M-12M; 28M-18M
M_1618	4-[3-(Diphenylmethylene)cyclopentyl]-2-butanone	304.182	7.762	5.3602e-11	190.91	1.3987e-08	12M-03M; 18M-03M; 28M-12M; 28M-18M
M_1619	amino-(3,4-dihydroxyphenyl)methylphosphonic acid	219.03	1.235	0.00054113	11.689	0.0041927	12M-03M; 18M-03M; 28M-03M
M_1622	Propane-1,2,3-triyl tris((3-isocyanatomethylphenyl)carbamate)	614.178	7.857	6.1913e-05	18.178	0.00090873	28M-03M; 28M-12M; 28M-18M
M_1624	Ribose 5-phosphate	230.019	1.421	0.0036881	7.4869	0.01695	28M-12M; 28M-18M
M_1625	1-[(4-Nitrobenzyl)sulfonyl]pyrrolidine	270.067	1.93	0.0091092	5.892	0.033795	12M-03M; 28M-03M
M_1628	CHEIROLIN	179.007	1.647	0.0019713	8.7263	0.010552	12M-03M; 18M-03M; 28M-03M
M_1629	DL-Tryptophan	204.09	1.993	0.0028893	7.956	0.014174	28M-03M; 28M-18M
M_1630	(2,5-Dimethyl-1,4-phenylene)bis(methylene) bis(N-carbamimidoylcarbamimidothioate)	366.143	2.177	0.0026502	8.1261	0.013324	28M-12M; 28M-18M
M_1632	2-trimethylammonioethyl methylphosphonofluoridate	184.091	1.309	0.0018392	8.8709	0.010052	12M-03M; 18M-03M; 28M-12M
M_1633	4,4'-Methylenebis[2-tert-butyl-6-(.alpha.-methylbenzyl)phenol]	520.336	10.379	0.011705	5.4866	0.040119	12M-03M; 18M-03M; 28M-03M
M_1637	2-Methyl-2-propanyl (2,4,6-triamino-5-pyrimidinyl)carbamate	240.134	7.419	0.0049412	6.9471	0.021138	28M-03M; 28M-12M
M_1638	9-Butyl-6-thioguanine	225.106	7.973	0.0034556	7.6103	0.016085	12M-03M; 28M-03M
M_1640	Glycerate	105.019	1.301	0.00053263	11.729	0.0041605	12M-03M; 18M-03M
M_1641	4,6-Bis(ethylamino)-1,3,5-triazine-2-carboxamide	210.124	8.082	0.00032089	13.062	0.0028742	18M-03M; 28M-03M; 28M-12M
M_1643	Valpromide	143.131	8.158	0.0018966	8.8067	0.010304	18M-12M; 28M-12M
M_1644	1-(Phenylthioxomethyl)piperidine	205.093	2.949	5.7833e-06	28.236	0.00016446	28M-03M; 28M-12M; 28M-18M
M_1645	D-Erythrose 4-phosphate	200.009	1.219	0.00029796	13.266	0.0027251	12M-03M; 18M-03M; 28M-03M
M_1649	Precocene II	220.11	8.609	5.2254e-06	28.754	0.00015339	12M-03M; 18M-03M; 28M-03M; 28M-12M
M_1652	2,2'-Bipyridine	156.069	7.67	0.0087304	5.9622	0.032897	28M-03M; 28M-12M
M_1653	Lys-Trp	332.186	8.777	0.0012636	9.6805	0.0076403	12M-03M; 18M-03M; 28M-03M
M_1654	trans-3-Indoleacrylic acid	187.063	7.306	0.0002299	13.998	0.0023245	28M-03M; 28M-12M; 28M-18M
M_1655	1-Benzosuberone	160.089	8.143	0.0060705	6.5812	0.024606	28M-03M; 28M-12M
M_1658	4-Acetamido-1,2,3-cyclohexanetriyl triacetate	315.132	7.686	2.1851e-10	152.89	3.9769e-08	28M-03M; 28M-12M; 28M-18M
M_1662	noradrenaline	169.074	3.726	0.0031949	7.7607	0.015101	12M-03M; 18M-03M; 28M-03M
M_1663	Gly-Lys	203.126	1.482	2.3755e-05	21.808	0.00046489	12M-03M; 28M-03M; 28M-12M; 28M-18M
M_1664	P,P-Bis(1-aziridinyl)-N,N-dimethylphosphinic amide	175.087	1.502	0.0063968	6.4899	0.025531	28M-03M; 28M-12M; 28M-18M
M_1676	6-Amino-1-ethyl-3-propyl-2,4(1H,3H)-pyrimidinedione	197.117	1.42	0.011594	5.5018	0.039812	28M-12M
M_1678	Arsenic acid	141.925	1.932	0.014113	5.1938	0.046615	28M-12M; 28M-18M
M_1685	AM9627000	165.043	4.917	3.7185e-08	66.837	3.9809e-06	12M-03M; 18M-03M; 28M-03M; 28M-18M
M_1692	4-[(2-Methyl-4,6-dinitro-1H-benzimidazol-5-yl)amino]phenol	329.074	4.7	0.0017828	8.9364	0.0098201	28M-03M; 28M-12M; 28M-18M
M_1693	C8-HSL	227.152	8.373	0.00057168	11.551	0.0043534	12M-03M; 28M-03M; 28M-18M
M_1696	Benzoxazole	119.037	4.629	0.0011656	9.8607	0.0072629	28M-03M; 28M-12M; 28M-18M
M_1698	glu-thr	248.101	1.216	0.014534	5.1485	0.047746	12M-03M; 18M-03M; 28M-03M
M_1705	2'-Deoxyadenosine	251.102	1.607	0.0002178	14.154	0.0022269	12M-03M; 18M-03M; 28M-12M; 28M-18M
M_1707	Leu-ala	202.132	1.877	4.7713e-11	194.44	1.3987e-08	12M-03M; 18M-03M; 28M-03M
M_1709	3,11,17,21-Tetrahydroxypregnan-20-one	366.241	8.259	0.0090903	5.8954	0.033795	28M-03M
M_1712	1H-1,2,4-triazole-3-sulfonic acid	148.99	0.597	0.00016799	14.922	0.0019229	12M-03M; 18M-12M; 28M-12M
M_1714	2,4,6-Triisopropylbenzophenone	308.214	9.382	0.010209	5.7058	0.03648	28M-03M; 28M-12M; 28M-18M
M_1716	3-(2-Thioxo-2,3-dihydro-1H-imidazol-4-yl)-2-(trimethylammonio)propanoate	229.088	1.422	0.010569	5.6498	0.037351	28M-03M; 28M-12M
M_1717	7,13-Dimethyl-1,4,10-trioxa-7,13-diazacyclopentadecane-2,6,14-trione	288.132	6.285	9.9488e-06	25.602	0.00023214	28M-03M; 28M-12M; 28M-18M
M_1721	1-Cyano-3-(2-{[(3-methoxy-2-pyridinyl)methyl]sulfanyl}ethyl)-2-methylguanidine	279.115	6.837	0.00045767	12.117	0.003729	28M-03M; 28M-12M; 28M-18M
M_1724	Dimethyl 4-morpholinylphosphonate	195.066	1.236	0.0066503	6.4226	0.026198	12M-03M; 18M-03M
M_1726	N-(2-oxolanylmethyl)-2-[7-oxo-3-(phenylmethyl)-6-triazolo[4,5-d]pyrimidinyl]acetamide	368.16	8.423	2.1355e-06	33.686	7.8119e-05	28M-03M; 28M-12M; 28M-18M
M_1728	MFCD01580212	243.039	6.687	4.3452e-05	19.458	0.0007061	12M-03M; 18M-03M; 28M-12M; 28M-18M
M_1739	1-(4-Nitrophenyl)piperidine	206.105	1.237	0.0070219	6.3291	0.027484	28M-03M; 28M-12M; 28M-18M
M_1740	[4-[1-(1-cyclopentyl-5-tetrazolyl)propyl]-1-piperazinyl]-(2-furanyl)methanone	358.212	8.501	0.0002647	13.596	0.0024961	28M-03M; 28M-12M; 28M-18M
M_1744	D-Erythrose 4-phosphate	200.009	1.133	0.00054903	11.652	0.004234	12M-03M; 18M-03M; 28M-03M
M_1745	4-Nitrophenyl (2E)-3-(2-thienyl)acrylate	275.024	7.817	0.0077119	6.1697	0.0298	28M-12M
M_1749	3,18-diethyl-2,7,13,17-tetramethyl-1,19-dioxo-1,2,3,4,5,15,16,17,18,19,22,24-dodecahydro-21H-biline-8,12-dipropanoic acid	594.341	10.723	0.00084125	10.612	0.0058216	12M-03M; 18M-03M; 28M-12M; 28M-18M
M_1754	N-(Phosphonomethyl)-D-glutamine	240.051	1.843	0.015448	5.0552	0.049938	12M-03M
M_1767	foscolic acid	242.019	1.413	0.0006625	11.186	0.0048836	12M-03M; 18M-03M; 28M-03M
M_1776	1,3-Dioxolane, 2-(2,4,6-trimethylcyclohex-3-enyl)-4-(1-piperidylmethyl)-	293.235	8.76	0.0019437	8.7556	0.010435	28M-12M
M_1777	adrenaline	183.09	3.32	0.00074398	10.904	0.00531	28M-03M; 28M-12M; 28M-18M
M_1780	LYSINOALANINE, (S,R)-	233.137	0.802	5.3797e-11	190.8	1.3987e-08	12M-03M; 18M-03M; 28M-03M; 28M-12M; 28M-18M
M_1781	(E)-p-coumaric acid	164.047	4.014	5.3788e-08	62.891	4.6617e-06	28M-03M; 28M-12M; 28M-18M
M_1784	2,2'-(5,5',10,10'-Tetrahydroxy-1,1'-dimethyl-6,6',9,9'-tetraoxo-3,3',4,4',6,6',9,9'-octahydro-1H,1'H-8,8'-bibenzo[g]isochromene-3,3'-diyl)diacetic acid	634.134	1.208	0.0038602	7.4012	0.01739	28M-03M
M_1792	Gly-Lys	203.126	1.349	0.00017205	14.85	0.0019475	28M-03M; 28M-12M; 28M-18M
M_1795	Ritipenem	288.042	3.497	0.0092537	5.8661	0.034231	28M-03M; 28M-12M
M_1796	Leu-Val	230.163	2.933	9.4887e-05	16.724	0.0012335	28M-03M; 28M-12M; 28M-18M
M_1799	Indole	117.058	7.392	0.00094826	10.332	0.0063684	18M-03M; 28M-03M; 28M-12M
M_1801	1-Cyclohexyl-3-(2-hydroxyethyl)thiourea	202.115	1.479	0.0058692	6.6404	0.024167	28M-03M; 28M-12M; 28M-18M
M_1810	Spirostan-3-yl acetate	458.339	9.064	1.0609e-05	25.304	0.0002444	28M-03M; 28M-12M; 28M-18M
M_1815	N~2~-(tert-Butoxycarbonyl)-N~6~-formyl-L-lysine	274.153	5.273	0.0012335	9.734	0.0075846	18M-03M; 28M-03M
M_1820	(2E)-2-(methylthiomethyl)-3-phenyl-2-propenal	192.061	5.023	0.00056661	11.573	0.0043329	28M-03M; 28M-12M; 28M-18M
